# Supplementary material for: Microarray analysis of Pseudomonas aeruginosa reveals induction of pyocin genes in response to hydrogen peroxide
Source: PubMed Central journal article supplement (PMC1250226; doi:10.1186/1471-2164-6-115), 2005-09-08
Supplement: 1471-2164-6-115-S1.pdf [file 1471-2164-6-115-S1.pdf]

**Supplementary Table 1. Probe set signal data for experimental and control samples**

| Affymetrix probe set name | Average signal of experimentals | Average signal of controls | p-value | Fold change* |
|---------------------------|---------------------------------|----------------------------|---------|--------------|
| PA0001_dnaA_at            | 516.62                          | 499.28                     | 0.238   | 1.03         |
| PA0002_dnaN_at            | 1337.60                         | 1278.28                    | 0.817   | 1.05         |
| PA0003_recF_at            | 364.18                          | 430.35                     | 0.048   | -1.18        |
| PA0004_gyrB_at            | 349.56                          | 461.25                     | 0.024   | -1.32        |
| PA0005_at                 | 115.16                          | 146.85                     | 0.024   | -1.28        |
| PA0006_at                 | 68.08                           | 92.10                      | 0.008   | -1.35        |
| PA0007_at                 | 5.30                            | 23.38                      | 0.008   | -4.41        |
| PA0008_glyS_at            | 346.64                          | 430.80                     | 0.087   | -1.24        |
| PA0009_glyQ_at            | 586.04                          | 675.40                     | 0.238   | -1.15        |
| PA0010_tag_at             | 29.24                           | 25.47                      | 0.817   | 1.15         |
| PA0011_at                 | 78.84                           | 110.55                     | 0.008   | -1.40        |
| PA0012_at                 | 44.20                           | 53.90                      | 0.048   | -1.22        |
| PA0013_at                 | 14.52                           | 33.00                      | 0.008   | -2.27        |
| PA0014_at                 | 13.04                           | 13.35                      | 0.817   | -1.02        |
| PA0015_at                 | 46.68                           | 64.45                      | 0.048   | -1.38        |
| PA0016_trkA_at            | 101.30                          | 180.60                     | 0.008   | -1.78        |
| PA0017_at                 | 141.50                          | 214.80                     | 0.087   | -1.52        |
| PA0018_fmt_at             | 256.22                          | 325.40                     | 0.087   | -1.27        |
| PA0019_def_at             | 575.64                          | 745.38                     | 0.008   | -1.29        |
| PA0020_at                 | 369.02                          | 335.20                     | 0.151   | 1.10         |
| PA0021_at                 | 8.14                            | 8.98                       | 0.484   | -1.10        |
| PA0022_at                 | 33.12                           | 48.97                      | 0.008   | -1.48        |
| PA0023_qor_at             | 92.56                           | 79.77                      | 0.238   | 1.16         |
| PA0024_hemF_at            | 190.28                          | 254.68                     | 0.048   | -1.34        |
| PA0025_aroE_at            | 59.64                           | 58.55                      | 1.000   | 1.02         |
| PA0026_at                 | 252.96                          | 193.48                     | 0.087   | 1.31         |
| PA0027_at                 | 65.14                           | 47.40                      | 0.087   | 1.37         |
| PA0028_at                 | 55.00                           | 40.47                      | 0.238   | 1.36         |
| PA0029_at                 | 9.90                            | 23.72                      | 0.151   | -2.40        |
| PA0030_at                 | 14.78                           | 16.45                      | 0.349   | -1.11        |
| PA0031_betC_at            | 9.46                            | 8.55                       | 0.817   | 1.11         |
| PA0032_at                 | 38.90                           | 42.50                      | 0.643   | -1.09        |
| PA0033_at                 | 29.50                           | 31.98                      | 0.484   | -1.08        |
| PA0034_at                 | 46.10                           | 55.35                      | 0.238   | -1.20        |
| PA0035_trpA_at            | 99.16                           | 122.65                     | 0.087   | -1.24        |
| PA0036_trpB_at            | 199.56                          | 192.08                     | 0.643   | 1.04         |
| PA0037_trpI_at            | 27.90                           | 36.45                      | 0.151   | -1.31        |
| PA0038_at                 | 46.62                           | 60.95                      | 0.151   | -1.31        |
| PA0039_at                 | 283.56                          | 435.22                     | 0.048   | -1.53        |
| PA0040_s_at               | 208.78                          | 214.35                     | 0.643   | -1.03        |
| PA0041_at                 | 27.98                           | 45.55                      | 0.048   | -1.63        |
| PA0042_at                 | 88.92                           | 124.25                     | 0.048   | -1.40        |
| PA0043_at                 | 15.70                           | 27.30                      | 0.008   | -1.74        |
| PA0044_exoT_at            | 82.96                           | 75.55                      | 0.238   | 1.10         |
| PA0045_at                 | 973.22                          | 1156.63                    | 0.024   | -1.19        |
| PA0046_at                 | 669.38                          | 917.28                     | 0.024   | -1.37        |

## Supplementary Table 1. Probe set signal data for experimental and control samples

|                |         |         |       |       |
|----------------|---------|---------|-------|-------|
| PA0047_at      | 230.96  | 311.42  | 0.024 | -1.35 |
| PA0048_at      | 31.00   | 37.00   | 0.484 | -1.19 |
| PA0049_at      | 182.86  | 113.55  | 0.008 | 1.61  |
| PA0050_r_at    | 52.54   | 67.70   | 0.238 | -1.29 |
| PA0051_at      | 17.74   | 21.77   | 0.643 | -1.23 |
| PA0052_at      | 18.54   | 11.98   | 0.484 | 1.55  |
| PA0053_at      | 40.14   | 40.33   | 0.730 | -1.00 |
| PA0054_at      | 52.16   | 52.30   | 0.643 | -1.00 |
| PA0055_at      | 525.16  | 449.48  | 0.024 | 1.17  |
| PA0056_at      | 22.60   | 20.92   | 0.484 | 1.08  |
| PA0057_at      | 36.02   | 33.78   | 0.643 | 1.07  |
| PA0058_at      | 14.40   | 24.88   | 0.087 | -1.73 |
| PA0059_osmC_at | 27.98   | 21.02   | 0.087 | 1.33  |
| PA0060_at      | 159.12  | 177.25  | 0.484 | -1.11 |
| PA0061_at      | 8.80    | 6.42    | 0.643 | 1.37  |
| PA0062_at      | 19.06   | 18.65   | 1.000 | 1.02  |
| PA0063_at      | 52.04   | 43.78   | 0.238 | 1.19  |
| PA0064_at      | 92.68   | 105.10  | 0.087 | -1.13 |
| PA0065_at      | 225.44  | 272.15  | 0.008 | -1.21 |
| PA0066_at      | 223.02  | 239.13  | 0.349 | -1.07 |
| PA0067_prfC_at | 1204.98 | 867.25  | 0.008 | 1.39  |
| PA0068_at      | 350.44  | 318.42  | 0.349 | 1.10  |
| PA0069_at      | 45.14   | 17.60   | 0.008 | 2.56  |
| PA0070_at      | 2113.70 | 1860.70 | 0.238 | 1.14  |
| PA0071_at      | 96.40   | 129.58  | 0.151 | -1.34 |
| PA0072_at      | 50.42   | 64.35   | 0.087 | -1.28 |
| PA0073_at      | 169.40  | 197.35  | 0.238 | -1.16 |
| PA0074_ppkA_at | 186.36  | 235.07  | 0.087 | -1.26 |
| PA0075_at      | 322.20  | 450.83  | 0.048 | -1.40 |
| PA0076_at      | 156.16  | 157.95  | 0.817 | -1.01 |
| PA0077_at      | 321.08  | 345.10  | 0.349 | -1.07 |
| PA0078_at      | 358.28  | 393.55  | 0.349 | -1.10 |
| PA0079_at      | 419.46  | 376.70  | 0.349 | 1.11  |
| PA0080_at      | 115.84  | 182.65  | 0.024 | -1.58 |
| PA0081_at      | 409.10  | 395.10  | 0.643 | 1.04  |
| PA0082_at      | 178.76  | 278.58  | 0.008 | -1.56 |
| PA0083_at      | 1486.66 | 1763.73 | 0.151 | -1.19 |
| PA0084_at      | 962.20  | 1282.50 | 0.024 | -1.33 |
| PA0085_at      | 1234.78 | 1551.17 | 0.238 | -1.26 |
| PA0086_at      | 611.84  | 622.13  | 1.000 | -1.02 |
| PA0087_at      | 285.88  | 316.40  | 0.643 | -1.11 |
| PA0088_at      | 166.14  | 216.47  | 0.087 | -1.30 |
| PA0089_at      | 189.04  | 239.55  | 0.151 | -1.27 |
| PA0090_at      | 654.06  | 668.85  | 1.000 | -1.02 |
| PA0091_at      | 126.42  | 174.55  | 0.151 | -1.38 |
| PA0092_at      | 73.58   | 117.50  | 0.008 | -1.60 |
| PA0093_at      | 297.36  | 227.45  | 0.048 | 1.31  |
| PA0094_at      | 537.82  | 486.48  | 0.151 | 1.11  |
| PA0095_at      | 148.04  | 129.13  | 0.238 | 1.15  |
| PA0096_at      | 66.34   | 59.65   | 0.484 | 1.11  |
| PA0097_at      | 79.30   | 77.35   | 1.000 | 1.03  |

**Supplementary Table 1. Probe set signal data for experimental and control samples**

|                 |         |         |       |       |
|-----------------|---------|---------|-------|-------|
| PA0098_at       | 58.54   | 43.18   | 0.024 | 1.36  |
| PA0099_at       | 65.18   | 55.60   | 0.484 | 1.17  |
| PA0100_at       | 172.58  | 174.03  | 1.000 | -1.01 |
| PA0101_at       | 127.74  | 116.70  | 1.000 | 1.09  |
| PA0102_at       | 391.64  | 415.50  | 0.643 | -1.06 |
| PA0103_at       | 55.54   | 65.05   | 0.238 | -1.17 |
| PA0104_at       | 15.18   | 16.27   | 0.643 | -1.07 |
| PA0105_coxB_at  | 17.18   | 9.40    | 0.087 | 1.83  |
| PA0106_coxA_at  | 15.00   | 13.75   | 0.643 | 1.09  |
| PA0107_at       | 14.94   | 11.35   | 0.484 | 1.32  |
| PA0108_collI_at | 21.98   | 14.98   | 0.238 | 1.47  |
| PA0109_at       | 8.40    | 6.78    | 0.817 | 1.24  |
| PA0110_at       | 29.54   | 36.08   | 0.175 | -1.22 |
| PA0111_at       | 9.74    | 12.52   | 0.238 | -1.29 |
| PA0112_at       | 30.86   | 28.82   | 0.643 | 1.07  |
| PA0113_at       | 40.36   | 36.75   | 0.817 | 1.10  |
| PA0114_at       | 153.04  | 166.32  | 0.349 | -1.09 |
| PA0115_at       | 90.34   | 88.57   | 0.643 | 1.02  |
| PA0116_at       | 48.16   | 60.58   | 0.087 | -1.26 |
| PA0117_at       | 74.76   | 72.95   | 0.817 | 1.02  |
| PA0118_at       | 31.52   | 31.18   | 0.817 | 1.01  |
| PA0119_at       | 34.04   | 27.38   | 0.643 | 1.24  |
| PA0120_at       | 38.78   | 39.15   | 1.000 | -1.01 |
| PA0121_at       | 40.14   | 44.13   | 0.349 | -1.10 |
| PA0122_at       | 84.56   | 74.00   | 0.349 | 1.14  |
| PA0123_at       | 58.38   | 52.25   | 0.087 | 1.12  |
| PA0124_at       | 131.68  | 144.43  | 0.151 | -1.10 |
| PA0125_at       | 108.76  | 144.05  | 0.048 | -1.32 |
| PA0126_at       | 565.20  | 708.40  | 0.048 | -1.25 |
| PA0127_at       | 29.18   | 31.83   | 0.817 | -1.09 |
| PA0128_at       | 43.12   | 97.80   | 0.008 | -2.27 |
| PA0129_gabP_at  | 108.38  | 82.25   | 0.151 | 1.32  |
| PA0130_at       | 223.60  | 158.93  | 0.008 | 1.41  |
| PA0131_at       | 91.00   | 133.80  | 0.151 | -1.47 |
| PA0132_at       | 262.30  | 302.65  | 0.238 | -1.15 |
| PA0133_at       | 61.68   | 47.75   | 0.048 | 1.29  |
| PA0134_at       | 31.02   | 30.95   | 0.817 | 1.00  |
| PA0135_at       | 10.08   | 11.23   | 0.817 | -1.11 |
| PA0136_at       | 3.56    | 11.43   | 0.024 | -3.21 |
| PA0137_at       | 10.84   | 17.83   | 0.151 | -1.64 |
| PA0138_at       | 8.24    | 8.30    | 1.000 | -1.01 |
| PA0139_ahpC_at  | 2937.08 | 2478.05 | 0.238 | 1.19  |
| PA0140_ahpF_at  | 126.76  | 162.30  | 0.087 | -1.28 |
| PA0141_at       | 110.68  | 98.50   | 0.238 | 1.12  |
| PA0142_at       | 44.14   | 31.07   | 0.151 | 1.42  |
| PA0143_at       | 111.68  | 177.93  | 0.008 | -1.59 |
| PA0144_at       | 12.52   | 27.00   | 0.024 | -2.16 |
| PA0145_i_at     | 7.70    | 18.35   | 0.024 | -2.38 |
| PA0146_at       | 17.90   | 30.28   | 0.151 | -1.69 |
| PA0147_at       | 57.34   | 38.42   | 0.008 | 1.49  |
| PA0148_at       | 118.10  | 142.48  | 0.048 | -1.21 |

### Supplementary Table 1. Probe set signal data for experimental and control samples

|                 |        |        |       |       |
|-----------------|--------|--------|-------|-------|
| PA0149_at       | 28.40  | 20.90  | 0.087 | 1.36  |
| PA0150_at       | 46.14  | 40.90  | 0.238 | 1.13  |
| PA0151_at       | 22.66  | 31.40  | 0.024 | -1.39 |
| PA0152_pcaQ_at  | 31.88  | 38.97  | 0.087 | -1.22 |
| PA0153_pcaH_at  | 41.50  | 47.45  | 0.484 | -1.14 |
| PA0154_pcaG_at  | 60.14  | 45.05  | 0.087 | 1.33  |
| PA0155_pcaR_at  | 154.14 | 159.95 | 0.484 | -1.04 |
| PA0156_at       | 244.32 | 205.88 | 0.048 | 1.19  |
| PA0157_at       | 106.78 | 108.68 | 1.000 | -1.02 |
| PA0158_at       | 47.76  | 78.95  | 0.008 | -1.65 |
| PA0159_at       | 73.70  | 83.55  | 0.349 | -1.13 |
| PA0160_at       | 47.26  | 91.85  | 0.008 | -1.94 |
| PA0161_at       | 21.42  | 36.90  | 0.008 | -1.72 |
| PA0162_at       | 128.78 | 278.10 | 0.008 | -2.16 |
| PA0163_at       | 28.86  | 24.17  | 0.484 | 1.19  |
| PA0164_at       | 24.44  | 21.50  | 0.817 | 1.14  |
| PA0165_at       | 608.40 | 784.38 | 0.008 | -1.29 |
| PA0166_at       | 2.68   | 10.85  | 0.008 | -4.05 |
| PA0167_at       | 271.22 | 187.98 | 0.048 | 1.44  |
| PA0168_at       | 112.48 | 58.00  | 0.008 | 1.94  |
| PA0169_at       | 55.60  | 94.08  | 0.024 | -1.69 |
| PA0170_at       | 109.48 | 169.83 | 0.024 | -1.55 |
| PA0171_at       | 223.64 | 396.85 | 0.008 | -1.77 |
| PA0172_at       | 101.14 | 113.28 | 0.349 | -1.12 |
| PA0173_at       | 11.82  | 7.73   | 0.349 | 1.53  |
| PA0174_at       | 23.60  | 25.35  | 0.817 | -1.07 |
| PA0175_at       | 24.96  | 27.40  | 0.484 | -1.10 |
| PA0176_at       | 73.78  | 60.22  | 0.008 | 1.23  |
| PA0177_at       | 10.88  | 15.63  | 0.087 | -1.44 |
| PA0178_at       | 36.78  | 30.33  | 0.151 | 1.21  |
| PA0179_at       | 113.64 | 93.47  | 0.008 | 1.22  |
| PA0180_at       | 61.40  | 65.15  | 0.643 | -1.06 |
| PA0181_at       | 54.50  | 50.63  | 0.643 | 1.08  |
| PA0182_at       | 181.04 | 26.83  | 0.024 | 6.75  |
| PA0183_atsA_at  | 46.70  | 38.80  | 0.643 | 1.20  |
| PA0184_at       | 10.28  | 8.52   | 0.643 | 1.21  |
| PA0185_at       | 30.64  | 27.10  | 0.349 | 1.13  |
| PA0186_at       | 3.14   | 13.82  | 0.024 | -4.40 |
| PA0187_at       | 10.40  | 16.67  | 0.238 | -1.60 |
| PA0188_at       | 22.16  | 15.88  | 0.349 | 1.40  |
| PA0189_at       | 31.46  | 18.17  | 0.008 | 1.73  |
| PA0190_at       | 7.36   | 6.37   | 0.643 | 1.16  |
| PA0191_at       | 13.54  | 15.50  | 0.643 | -1.14 |
| PA0192_at       | 17.00  | 21.23  | 0.349 | -1.25 |
| PA0193_at       | 30.74  | 31.80  | 0.556 | -1.03 |
| PA0194_at       | 30.34  | 39.15  | 0.151 | -1.29 |
| PA0195_pntA_at  | 68.94  | 74.72  | 0.484 | -1.08 |
| PA0196_pntB_at  | 24.68  | 29.65  | 0.238 | -1.20 |
| PA0197_at       | 32.86  | 23.80  | 0.048 | 1.38  |
| PA0198_exbB1_at | 6.88   | 4.13   | 0.643 | 1.67  |
| PA0199_exbD1_at | 10.80  | 25.00  | 0.024 | -2.31 |

**Supplementary Table 1. Probe set signal data for experimental and control samples**

|                 |       |       |       |       |
|-----------------|-------|-------|-------|-------|
| PA0200_i_at     | 23.62 | 33.85 | 0.349 | -1.43 |
| PA0201_at       | 52.12 | 71.38 | 0.413 | -1.37 |
| PA0202_at       | 20.16 | 18.95 | 0.817 | 1.06  |
| PA0203_at       | 14.50 | 10.75 | 0.151 | 1.35  |
| PA0204_at       | 13.16 | 12.95 | 0.817 | 1.02  |
| PA0205_at       | 26.00 | 28.20 | 0.413 | -1.08 |
| PA0206_at       | 34.32 | 27.97 | 0.349 | 1.23  |
| PA0207_at       | 60.10 | 48.03 | 0.087 | 1.25  |
| PA0208_mdcA_at  | 15.20 | 13.25 | 1.000 | 1.15  |
| PA0209_at       | 19.88 | 17.83 | 0.817 | 1.11  |
| PA0210_mdcC_at  | 22.02 | 14.35 | 0.024 | 1.53  |
| PA0211_mdcD_at  | 10.04 | 18.67 | 0.008 | -1.86 |
| PA0212_mdcE_at  | 5.48  | 15.35 | 0.048 | -2.80 |
| PA0213_at       | 12.08 | 8.40  | 0.151 | 1.44  |
| PA0214_at       | 7.70  | 17.55 | 0.048 | -2.28 |
| PA0215_at       | 27.00 | 21.10 | 0.238 | 1.28  |
| PA0216_at       | 6.78  | 11.07 | 0.349 | -1.63 |
| PA0217_at       | 18.16 | 30.10 | 0.008 | -1.66 |
| PA0218_at       | 29.58 | 30.63 | 0.817 | -1.04 |
| PA0219_at       | 19.68 | 22.10 | 0.817 | -1.12 |
| PA0220_at       | 21.96 | 27.25 | 0.349 | -1.24 |
| PA0221_at       | 19.78 | 18.40 | 0.413 | 1.08  |
| PA0222_at       | 3.20  | 5.43  | 0.238 | -1.70 |
| PA0223_at       | 25.60 | 30.85 | 0.048 | -1.21 |
| PA0224_at       | 36.36 | 40.15 | 0.349 | -1.10 |
| PA0225_at       | 46.48 | 75.25 | 0.008 | -1.62 |
| PA0226_at       | 21.42 | 26.33 | 0.349 | -1.23 |
| PA0227_at       | 30.58 | 36.13 | 0.151 | -1.18 |
| PA0228_pcaF_at  | 16.60 | 17.05 | 0.817 | -1.03 |
| PA0229_pcaT_at  | 13.08 | 15.72 | 0.484 | -1.20 |
| PA0230_pcaB_at  | 92.92 | 67.22 | 0.048 | 1.38  |
| PA0231_pcaD_at  | 97.10 | 69.27 | 0.008 | 1.40  |
| PA0232_pcaC_at  | 40.80 | 38.73 | 0.484 | 1.05  |
| PA0233_at       | 57.68 | 33.60 | 0.024 | 1.72  |
| PA0234_at       | 15.54 | 16.55 | 0.349 | -1.06 |
| PA0235_pcaK_at  | 35.20 | 34.03 | 0.484 | 1.03  |
| PA0236_at       | 85.34 | 88.30 | 0.643 | -1.03 |
| PA0237_at       | 18.76 | 28.80 | 0.143 | -1.54 |
| PA0238_at       | 21.48 | 22.75 | 0.817 | -1.06 |
| PA0239_at       | 36.72 | 34.45 | 0.643 | 1.07  |
| PA0240_at       | 5.24  | 13.42 | 0.048 | -2.56 |
| PA0241_at       | 35.40 | 33.08 | 0.484 | 1.07  |
| PA0242_at       | 17.42 | 20.85 | 0.238 | -1.20 |
| PA0243_at       | 59.66 | 51.20 | 0.817 | 1.17  |
| PA0244_at       | 20.82 | 22.17 | 1.000 | -1.06 |
| PA0245_aroQ2_at | 24.12 | 31.08 | 0.286 | -1.29 |
| PA0246_at       | 41.62 | 41.95 | 1.000 | -1.01 |
| PA0247_pobA_at  | 28.38 | 23.10 | 0.349 | 1.23  |
| PA0248_at       | 38.36 | 30.33 | 0.151 | 1.26  |
| PA0249_at       | 29.40 | 31.58 | 0.817 | -1.07 |
| PA0250_at       | 35.24 | 45.43 | 0.238 | -1.29 |

## Supplementary Table 1. Probe set signal data for experimental and control samples

|                  |         |         |       |       |
|------------------|---------|---------|-------|-------|
| PA0251_at        | 10.60   | 7.90    | 0.349 | 1.34  |
| PA0252_at        | 24.18   | 27.40   | 0.349 | -1.13 |
| PA0253_at        | 43.38   | 57.35   | 0.048 | -1.32 |
| PA0254_at        | 31.18   | 38.20   | 0.238 | -1.23 |
| PA0255_at        | 54.38   | 48.73   | 0.643 | 1.12  |
| PA0256_at        | 20.36   | 9.98    | 0.024 | 2.04  |
| PA0257_at        | 19.18   | 15.63   | 0.349 | 1.23  |
| PA0258_at        | 25.24   | 28.10   | 0.484 | -1.11 |
| PA0259_at        | 102.08  | 88.18   | 0.151 | 1.16  |
| PA0260_at        | 146.78  | 136.23  | 0.349 | 1.08  |
| PA0261_at        | 79.16   | 73.10   | 0.238 | 1.08  |
| PA0262_at        | 22.50   | 33.63   | 0.024 | -1.49 |
| PA0263_hcpC_s_at | 83.90   | 122.20  | 0.151 | -1.46 |
| PA0264_at        | 12.68   | 16.80   | 0.643 | -1.32 |
| PA0265_gabD_at   | 710.50  | 616.82  | 0.087 | 1.15  |
| PA0266_gabT_at   | 1059.68 | 626.83  | 0.008 | 1.69  |
| PA0267_at        | 39.38   | 57.28   | 0.008 | -1.45 |
| PA0268_at        | 22.46   | 20.48   | 0.921 | 1.10  |
| PA0269_at        | 85.98   | 70.88   | 0.151 | 1.21  |
| PA0270_at        | 84.50   | 53.13   | 0.008 | 1.59  |
| PA0271_at        | 60.82   | 43.52   | 0.024 | 1.40  |
| PA0272_at        | 41.64   | 41.40   | 0.817 | 1.01  |
| PA0273_at        | 13.04   | 7.80    | 0.349 | 1.67  |
| PA0274_at        | 17.74   | 16.48   | 0.817 | 1.08  |
| PA0275_at        | 60.34   | 43.53   | 0.151 | 1.39  |
| PA0276_at        | 10.54   | 8.67    | 0.817 | 1.22  |
| PA0277_at        | 837.66  | 992.20  | 0.643 | -1.18 |
| PA0278_at        | 22.84   | 17.38   | 0.484 | 1.31  |
| PA0279_at        | 33.82   | 25.10   | 0.151 | 1.35  |
| PA0280_cysA_at   | 29.82   | 86.92   | 0.024 | -2.91 |
| PA0281_cysW_at   | 54.02   | 151.23  | 0.008 | -2.80 |
| PA0282_cysT_at   | 60.56   | 148.45  | 0.008 | -2.45 |
| PA0283_sbp_at    | 105.10  | 213.42  | 0.008 | -2.03 |
| PA0284_at        | 292.34  | 657.47  | 0.048 | -2.25 |
| PA0285_at        | 113.10  | 117.47  | 0.643 | -1.04 |
| PA0286_at        | 217.80  | 205.53  | 0.151 | 1.06  |
| PA0287_at        | 4.26    | 6.43    | 0.484 | -1.51 |
| PA0288_speB1_at  | 16.64   | 10.25   | 0.238 | 1.62  |
| PA0289_at        | 46.06   | 34.95   | 0.024 | 1.32  |
| PA0290_at        | 23.22   | 20.38   | 1.000 | 1.14  |
| PA0291_oprE_at   | 1385.40 | 1142.18 | 0.024 | 1.21  |
| PA0292_at        | 383.24  | 357.45  | 0.484 | 1.07  |
| PA0293_at        | 82.74   | 142.92  | 0.008 | -1.73 |
| PA0294_at        | 72.26   | 66.68   | 0.349 | 1.08  |
| PA0295_at        | 86.82   | 61.88   | 0.048 | 1.40  |
| PA0296_s_at      | 453.72  | 326.70  | 0.048 | 1.39  |
| PA0297_at        | 46.14   | 43.10   | 0.817 | 1.07  |
| PA0298_at        | 216.56  | 187.27  | 0.238 | 1.16  |
| PA0299_at        | 805.18  | 536.53  | 0.008 | 1.50  |
| PA0300_potF2_at  | 597.60  | 564.63  | 0.349 | 1.06  |
| PA0301_potF3_at  | 262.76  | 271.58  | 0.643 | -1.03 |

### Supplementary Table 1. Probe set signal data for experimental and control samples

|                 |        |        |       |       |
|-----------------|--------|--------|-------|-------|
| PA0302_potG_at  | 423.12 | 316.17 | 0.048 | 1.34  |
| PA0303_potH_at  | 403.22 | 312.65 | 0.008 | 1.29  |
| PA0304_potI_at  | 46.52  | 68.90  | 0.024 | -1.48 |
| PA0305_at       | 75.00  | 56.10  | 0.087 | 1.34  |
| PA0306_at       | 31.74  | 25.00  | 0.024 | 1.27  |
| PA0307_at       | 36.46  | 37.40  | 0.484 | -1.03 |
| PA0308_at       | 113.54 | 83.18  | 0.024 | 1.36  |
| PA0309_at       | 97.02  | 113.18 | 0.349 | -1.17 |
| PA0310_at       | 51.30  | 60.30  | 0.151 | -1.18 |
| PA0311_at       | 22.72  | 37.45  | 0.087 | -1.65 |
| PA0312_at       | 123.86 | 81.73  | 0.008 | 1.52  |
| PA0313_at       | 50.02  | 58.72  | 0.087 | -1.17 |
| PA0314_at       | 167.20 | 128.92 | 0.024 | 1.30  |
| PA0315_at       | 374.88 | 259.17 | 0.048 | 1.45  |
| PA0316_serA_at  | 425.04 | 594.08 | 0.024 | -1.40 |
| PA0317_at       | 507.52 | 461.78 | 0.048 | 1.10  |
| PA0318_at       | 249.22 | 227.48 | 0.349 | 1.10  |
| PA0319_at       | 189.72 | 194.38 | 0.643 | -1.02 |
| PA0320_at       | 34.04  | 74.35  | 0.008 | -2.18 |
| PA0321_at       | 20.12  | 9.25   | 0.008 | 2.18  |
| PA0322_at       | 9.76   | 9.53   | 1.000 | 1.02  |
| PA0323_at       | 4.18   | 6.03   | 0.238 | -1.44 |
| PA0324_at       | 5.40   | 8.35   | 0.238 | -1.55 |
| PA0325_at       | 23.32  | 19.92  | 0.556 | 1.17  |
| PA0326_at       | 32.06  | 29.35  | 0.484 | 1.09  |
| PA0327_at       | 8.94   | 9.40   | 0.484 | -1.05 |
| PA0328_at       | 120.52 | 99.05  | 0.087 | 1.22  |
| PA0329_at       | 117.58 | 120.42 | 0.817 | -1.02 |
| PA0330_rpiA_at  | 302.12 | 367.80 | 0.048 | -1.22 |
| PA0331_ilvA1_at | 223.58 | 263.60 | 0.087 | -1.18 |
| PA0332_at       | 101.38 | 100.18 | 0.817 | 1.01  |
| PA0333_at       | 63.52  | 64.58  | 0.643 | -1.02 |
| PA0334_at       | 44.30  | 44.10  | 0.643 | 1.00  |
| PA0335_at       | 428.52 | 217.65 | 0.008 | 1.97  |
| PA0336_at       | 819.72 | 747.27 | 0.643 | 1.10  |
| PA0337_ptsP_at  | 310.54 | 237.00 | 0.008 | 1.31  |
| PA0338_at       | 19.52  | 27.47  | 0.087 | -1.41 |
| PA0339_at       | 41.40  | 34.05  | 0.238 | 1.22  |
| PA0340_at       | 110.70 | 113.77 | 0.643 | -1.03 |
| PA0341_lgt_at   | 82.46  | 111.55 | 0.008 | -1.35 |
| PA0342_thyA_at  | 498.66 | 502.85 | 0.817 | -1.01 |
| PA0343_at       | 19.16  | 25.58  | 0.087 | -1.34 |
| PA0344_at       | 50.42  | 46.35  | 0.349 | 1.09  |
| PA0345_at       | 112.90 | 83.57  | 0.008 | 1.35  |
| PA0346_at       | 39.76  | 29.67  | 0.087 | 1.34  |
| PA0347_glpQ_at  | 31.98  | 31.70  | 0.643 | 1.01  |
| PA0348_at       | 21.56  | 22.88  | 1.000 | -1.06 |
| PA0349_at       | 9.32   | 10.03  | 0.643 | -1.08 |
| PA0350_folA_at  | 129.10 | 105.30 | 0.008 | 1.23  |
| PA0351_at       | 96.32  | 84.80  | 0.190 | 1.14  |
| PA0352_at       | 69.84  | 149.63 | 0.008 | -2.14 |

### Supplementary Table 1. Probe set signal data for experimental and control samples

|                |         |        |       |       |
|----------------|---------|--------|-------|-------|
| PA0353_ilvD_at | 167.44  | 154.97 | 0.817 | 1.08  |
| PA0354_at      | 177.06  | 231.02 | 0.024 | -1.30 |
| PA0355_pfpI_at | 33.44   | 27.63  | 0.151 | 1.21  |
| PA0356_at      | 76.50   | 120.65 | 0.008 | -1.58 |
| PA0357_mutM_at | 129.70  | 106.92 | 0.151 | 1.21  |
| PA0358_at      | 122.58  | 125.47 | 0.643 | -1.02 |
| PA0359_at      | 202.38  | 206.05 | 0.484 | -1.02 |
| PA0360_at      | 77.90   | 66.88  | 0.349 | 1.16  |
| PA0361_at      | 79.48   | 61.40  | 0.024 | 1.29  |
| PA0362_fdx1_at | 183.82  | 290.55 | 0.008 | -1.58 |
| PA0363_coaD_at | 237.86  | 339.42 | 0.008 | -1.43 |
| PA0364_at      | 17.92   | 12.57  | 0.286 | 1.43  |
| PA0365_at      | 65.82   | 55.50  | 0.349 | 1.19  |
| PA0366_at      | 50.86   | 63.20  | 0.048 | -1.24 |
| PA0367_at      | 40.20   | 48.00  | 0.151 | -1.19 |
| PA0368_at      | 57.42   | 49.97  | 0.151 | 1.15  |
| PA0369_at      | 60.94   | 85.20  | 0.024 | -1.40 |
| PA0370_at      | 257.16  | 260.47 | 0.817 | -1.01 |
| PA0371_at      | 223.60  | 228.55 | 0.484 | -1.02 |
| PA0372_at      | 392.10  | 435.10 | 0.151 | -1.11 |
| PA0373_ftsY_at | 329.74  | 346.40 | 0.087 | -1.05 |
| PA0374_ftsE_at | 351.52  | 371.35 | 0.817 | -1.06 |
| PA0375_ftsX_at | 282.84  | 312.83 | 0.349 | -1.11 |
| PA0376_rpoH_at | 1061.68 | 955.80 | 0.238 | 1.11  |
| PA0377_at      | 90.76   | 92.97  | 0.905 | -1.02 |
| PA0378_at      | 51.56   | 40.40  | 0.151 | 1.28  |
| PA0379_at      | 102.38  | 121.20 | 0.413 | -1.18 |
| PA0380_i_at    | 385.98  | 499.10 | 0.008 | -1.29 |
| PA0381_thiG_at | 340.16  | 491.43 | 0.008 | -1.44 |
| PA0382_micA_at | 134.78  | 221.97 | 0.008 | -1.65 |
| PA0383_at      | 17.00   | 18.18  | 0.817 | -1.07 |
| PA0384_at      | 37.10   | 48.97  | 0.008 | -1.32 |
| PA0385_at      | 44.84   | 95.57  | 0.008 | -2.13 |
| PA0386_at      | 149.04  | 144.73 | 0.349 | 1.03  |
| PA0387_at      | 374.82  | 367.08 | 0.817 | 1.02  |
| PA0388_at      | 167.86  | 264.83 | 0.008 | -1.58 |
| PA0389_at      | 157.12  | 203.10 | 0.008 | -1.29 |
| PA0390_metX_at | 300.74  | 384.28 | 0.008 | -1.28 |
| PA0391_at      | 120.40  | 102.60 | 0.087 | 1.17  |
| PA0392_at      | 388.52  | 384.08 | 0.643 | 1.01  |
| PA0393_proC_at | 456.68  | 350.70 | 0.024 | 1.30  |
| PA0394_at      | 477.90  | 465.17 | 0.643 | 1.03  |
| PA0395_pilT_at | 262.18  | 202.80 | 0.008 | 1.29  |
| PA0396_pilU_at | 155.24  | 146.42 | 0.238 | 1.06  |
| PA0397_at      | 21.08   | 22.33  | 0.730 | -1.06 |
| PA0398_at      | 58.24   | 71.45  | 0.087 | -1.23 |
| PA0399_at      | 349.54  | 337.33 | 0.349 | 1.04  |
| PA0400_at      | 229.68  | 260.27 | 0.349 | -1.13 |
| PA0401_at      | 159.94  | 174.07 | 0.151 | -1.09 |
| PA0402_pyrB_at | 442.96  | 394.85 | 0.238 | 1.12  |
| PA0403_pyrR_at | 200.56  | 221.75 | 0.238 | -1.11 |



## Supplementary Table 1. Probe set signal data for experimental and control samples

|                |         |         |       |       |
|----------------|---------|---------|-------|-------|
| PA0404_i_at    | 386.02  | 281.42  | 0.008 | 1.37  |
| PA0405_at      | 372.60  | 272.20  | 0.008 | 1.37  |
| PA0406_at      | 231.58  | 201.40  | 0.484 | 1.15  |
| PA0407_gshB_at | 265.62  | 244.25  | 0.643 | 1.09  |
| PA0408_pilG_at | 587.52  | 745.75  | 0.048 | -1.27 |
| PA0409_pilH_at | 1800.62 | 1501.50 | 0.087 | 1.20  |
| PA0410_pill_at | 322.24  | 340.22  | 0.817 | -1.06 |
| PA0411_pilJ_at | 512.10  | 452.40  | 0.008 | 1.13  |
| PA0412_pilK_at | 78.74   | 92.13   | 0.151 | -1.17 |
| PA0413_at      | 432.94  | 311.53  | 0.008 | 1.39  |
| PA0414_at      | 136.46  | 105.52  | 0.008 | 1.29  |
| PA0415_at      | 146.84  | 128.13  | 0.349 | 1.15  |
| PA0416_at      | 26.52   | 33.78   | 0.087 | -1.27 |
| PA0417_at      | 26.12   | 30.47   | 0.349 | -1.17 |
| PA0418_at      | 58.86   | 43.70   | 0.048 | 1.35  |
| PA0419_at      | 138.28  | 150.22  | 0.087 | -1.09 |
| PA0420_bioA_at | 267.50  | 280.42  | 0.484 | -1.05 |
| PA0421_at      | 210.24  | 246.80  | 0.024 | -1.17 |
| PA0422_at      | 951.18  | 541.92  | 0.008 | 1.76  |
| PA0423_at      | 224.52  | 187.63  | 0.349 | 1.20  |
| PA0424_mexR_at | 109.88  | 138.85  | 0.238 | -1.26 |
| PA0425_mexA_at | 1221.46 | 877.78  | 0.008 | 1.39  |
| PA0426_mexB_at | 882.80  | 593.47  | 0.008 | 1.49  |
| PA0427_oprM_at | 793.90  | 605.08  | 0.008 | 1.31  |
| PA0428_at      | 457.98  | 577.10  | 0.048 | -1.26 |
| PA0429_at      | 294.96  | 358.70  | 0.087 | -1.22 |
| PA0430_metF_at | 473.98  | 672.47  | 0.008 | -1.42 |
| PA0431_at      | 764.92  | 850.28  | 0.087 | -1.11 |
| PA0432_sahH_at | 1644.50 | 1510.13 | 0.087 | 1.09  |
| PA0433_at      | 96.78   | 80.10   | 0.087 | 1.21  |
| PA0434_at      | 30.06   | 41.18   | 0.087 | -1.37 |
| PA0435_at      | 39.50   | 20.45   | 0.024 | 1.93  |
| PA0436_at      | 69.44   | 111.40  | 0.008 | -1.60 |
| PA0437_codA_at | 236.64  | 285.80  | 0.111 | -1.21 |
| PA0438_codB_at | 122.02  | 119.50  | 0.643 | 1.02  |
| PA0439_at      | 8.58    | 6.45    | 0.643 | 1.33  |
| PA0440_at      | 5.66    | 3.25    | 0.643 | 1.74  |
| PA0441_at      | 6.66    | 10.40   | 0.349 | -1.56 |
| PA0442_r_at    | 3.90    | 0.00    | 0.008 |       |
| PA0443_at      | 9.88    | 11.10   | 1.000 | -1.12 |
| PA0444_at      | 12.26   | 19.88   | 0.286 | -1.62 |
| PA0445_s_at    | 90.40   | 94.07   | 0.730 | -1.04 |
| PA0446_at      | 116.10  | 74.10   | 0.024 | 1.57  |
| PA0447_gcdH_at | 328.46  | 150.43  | 0.008 | 2.18  |
| PA0448_at      | 48.74   | 44.10   | 0.087 | 1.11  |
| PA0449_at      | 143.90  | 200.50  | 0.024 | -1.39 |
| PA0450_at      | 10.64   | 5.13    | 0.151 | 2.07  |
| PA0451_at      | 21.16   | 16.45   | 0.238 | 1.29  |
| PA0452_at      | 4.26    | 13.57   | 0.024 | -3.19 |
| PA0453_at      | 5.02    | 14.15   | 0.048 | -2.82 |
| PA0454_at      | 78.76   | 61.47   | 0.024 | 1.28  |

### Supplementary Table 1. Probe set signal data for experimental and control samples

|                |        |         |       |       |
|----------------|--------|---------|-------|-------|
| PA0455_dbpA_at | 89.74  | 89.50   | 0.817 | 1.00  |
| PA0456_at      | 936.44 | 1206.55 | 0.024 | -1.29 |
| PA0457_at      | 83.70  | 97.63   | 0.063 | -1.17 |
| PA0458_at      | 69.54  | 69.70   | 1.000 | -1.00 |
| PA0459_at      | 39.88  | 35.57   | 0.349 | 1.12  |
| PA0460_at      | 46.44  | 52.63   | 0.817 | -1.13 |
| PA0461_at      | 193.56 | 146.38  | 0.087 | 1.32  |
| PA0462_at      | 66.94  | 51.82   | 0.349 | 1.29  |
| PA0463_creB_at | 142.62 | 110.52  | 0.087 | 1.29  |
| PA0464_creC_at | 44.40  | 40.95   | 1.000 | 1.08  |
| PA0465_creD_at | 5.72   | 10.35   | 0.087 | -1.81 |
| PA0466_at      | 9.80   | 10.80   | 0.643 | -1.10 |
| PA0467_at      | 189.36 | 161.02  | 0.024 | 1.18  |
| PA0468_at      | 88.82  | 63.72   | 0.008 | 1.39  |
| PA0469_at      | 125.68 | 97.80   | 0.048 | 1.29  |
| PA0470_at      | 46.50  | 47.47   | 1.000 | -1.02 |
| PA0471_at      | 29.22  | 40.20   | 0.087 | -1.38 |
| PA0472_at      | 39.90  | 52.25   | 0.087 | -1.31 |
| PA0473_at      | 115.58 | 89.98   | 0.238 | 1.28  |
| PA0474_at      | 12.62  | 5.85    | 0.238 | 2.16  |
| PA0475_at      | 28.36  | 15.70   | 0.008 | 1.81  |
| PA0476_at      | 17.60  | 6.10    | 0.048 | 2.89  |
| PA0477_at      | 23.46  | 25.50   | 0.349 | -1.09 |
| PA0478_at      | 37.04  | 43.30   | 0.238 | -1.17 |
| PA0479_at      | 25.18  | 17.23   | 0.048 | 1.46  |
| PA0480_at      | 8.46   | 4.45    | 0.087 | 1.90  |
| PA0481_at      | 41.76  | 48.32   | 0.413 | -1.16 |
| PA0482_glcB_at | 633.70 | 581.60  | 0.151 | 1.09  |
| PA0483_at      | 20.42  | 17.70   | 0.817 | 1.15  |
| PA0484_at      | 20.22  | 19.48   | 1.000 | 1.04  |
| PA0485_at      | 55.86  | 54.00   | 0.817 | 1.03  |
| PA0486_at      | 93.14  | 71.22   | 0.024 | 1.31  |
| PA0487_at      | 84.70  | 72.40   | 0.349 | 1.17  |
| PA0488_at      | 47.38  | 42.67   | 0.817 | 1.11  |
| PA0489_at      | 12.78  | 10.55   | 0.992 | 1.21  |
| PA0490_at      | 37.56  | 35.28   | 1.000 | 1.06  |
| PA0491_at      | 31.46  | 42.72   | 0.238 | -1.36 |
| PA0492_at      | 420.24 | 210.28  | 0.024 | 2.00  |
| PA0493_at      | 510.12 | 248.20  | 0.008 | 2.06  |
| PA0494_at      | 497.00 | 219.90  | 0.008 | 2.26  |
| PA0495_at      | 723.76 | 352.55  | 0.008 | 2.05  |
| PA0496_at      | 127.28 | 68.20   | 0.008 | 1.87  |
| PA0497_at      | 12.58  | 7.22    | 0.087 | 1.74  |
| PA0498_at      | 7.92   | 3.80    | 0.286 | 2.08  |
| PA0499_at      | 13.02  | 11.40   | 0.484 | 1.14  |
| PA0500_bioB_at | 230.88 | 286.15  | 0.087 | -1.24 |
| PA0501_bioF_at | 135.70 | 150.48  | 0.484 | -1.11 |
| PA0502_at      | 107.50 | 117.97  | 0.238 | -1.10 |
| PA0503_at      | 68.88  | 81.52   | 0.349 | -1.18 |
| PA0504_bioD_at | 38.28  | 43.05   | 0.643 | -1.12 |
| PA0505_at      | 84.44  | 86.27   | 0.484 | -1.02 |

## Supplementary Table 1. Probe set signal data for experimental and control samples

|                |         |         |       |       |
|----------------|---------|---------|-------|-------|
| PA0506_at      | 130.80  | 178.78  | 0.048 | -1.37 |
| PA0507_at      | 35.86   | 24.65   | 0.008 | 1.45  |
| PA0508_at      | 38.76   | 44.03   | 0.238 | -1.14 |
| PA0509_nirN_at | 33.14   | 50.03   | 0.008 | -1.51 |
| PA0510_at      | 25.12   | 18.02   | 0.349 | 1.39  |
| PA0511_nirJ_at | 34.80   | 48.10   | 0.151 | -1.38 |
| PA0512_at      | 23.46   | 20.10   | 0.484 | 1.17  |
| PA0513_at      | 22.82   | 22.20   | 0.349 | 1.03  |
| PA0514_nirL_at | 29.40   | 19.23   | 0.048 | 1.53  |
| PA0515_at      | 51.78   | 43.58   | 0.643 | 1.19  |
| PA0516_nirF_at | 44.34   | 35.58   | 0.238 | 1.25  |
| PA0517_nirC_at | 66.06   | 59.13   | 0.349 | 1.12  |
| PA0518_nirM_at | 64.74   | 96.10   | 0.151 | -1.48 |
| PA0519_nirS_at | 74.70   | 89.90   | 0.817 | -1.20 |
| PA0520_nirQ_at | 41.10   | 34.18   | 0.349 | 1.20  |
| PA0521_at      | 12.86   | 13.53   | 0.905 | -1.05 |
| PA0522_r_at    | 84.42   | 104.90  | 0.238 | -1.24 |
| PA0523_norC_at | 11.80   | 8.15    | 0.087 | 1.45  |
| PA0524_norB_at | 10.40   | 5.33    | 0.111 | 1.95  |
| PA0525_at      | 5.90    | 11.02   | 0.087 | -1.87 |
| PA0526_at      | 16.02   | 26.83   | 0.008 | -1.67 |
| PA0527_dnr_at  | 73.30   | 128.78  | 0.008 | -1.76 |
| PA0528_at      | 8.70    | 31.52   | 0.008 | -3.62 |
| PA0529_at      | 36.50   | 20.73   | 0.008 | 1.76  |
| PA0530_at      | 24.78   | 17.98   | 0.230 | 1.38  |
| PA0531_at      | 4.26    | 6.35    | 0.151 | -1.49 |
| PA0532_at      | 12.84   | 20.23   | 0.151 | -1.58 |
| PA0533_at      | 28.36   | 24.08   | 0.484 | 1.18  |
| PA0534_at      | 16.18   | 17.95   | 0.730 | -1.11 |
| PA0535_at      | 27.26   | 26.35   | 0.817 | 1.03  |
| PA0536_at      | 130.66  | 165.35  | 0.008 | -1.27 |
| PA0537_at      | 481.70  | 593.03  | 0.151 | -1.23 |
| PA0538_dsbB_at | 73.86   | 78.60   | 0.484 | -1.06 |
| PA0539_at      | 14.48   | 7.07    | 0.190 | 2.05  |
| PA0540_at      | 15.98   | 14.52   | 0.643 | 1.10  |
| PA0541_at      | 170.82  | 240.30  | 0.024 | -1.41 |
| PA0542_at      | 215.32  | 242.88  | 0.087 | -1.13 |
| PA0543_at      | 10.32   | 17.80   | 0.087 | -1.72 |
| PA0544_at      | 56.38   | 62.75   | 0.484 | -1.11 |
| PA0545_at      | 25.76   | 32.25   | 0.151 | -1.25 |
| PA0546_metK_at | 1382.82 | 979.47  | 0.024 | 1.41  |
| PA0547_at      | 419.16  | 287.50  | 0.008 | 1.46  |
| PA0548_tktA_at | 609.36  | 819.50  | 0.008 | -1.34 |
| PA0549_at      | 89.90   | 146.40  | 0.008 | -1.63 |
| PA0550_at      | 41.00   | 28.35   | 0.048 | 1.45  |
| PA0551_epd_at  | 592.42  | 538.05  | 0.349 | 1.10  |
| PA0552_pgk_at  | 480.08  | 490.22  | 0.349 | -1.02 |
| PA0553_at      | 499.72  | 457.00  | 0.484 | 1.09  |
| PA0554_at      | 691.80  | 852.55  | 0.008 | -1.23 |
| PA0555_fda_at  | 1564.84 | 1615.27 | 0.484 | -1.03 |
| PA0556_at      | 38.90   | 54.33   | 0.151 | -1.40 |

**Supplementary Table 1. Probe set signal data for experimental and control samples**

|                |         |         |       |       |
|----------------|---------|---------|-------|-------|
| PA0557_at      | 10.28   | 11.62   | 0.817 | -1.13 |
| PA0558_at      | 49.44   | 30.60   | 0.024 | 1.62  |
| PA0559_at      | 93.12   | 130.10  | 0.008 | -1.40 |
| PA0560_at      | 39.22   | 49.72   | 0.048 | -1.27 |
| PA0561_at      | 14.32   | 17.38   | 0.643 | -1.21 |
| PA0562_at      | 168.70  | 172.10  | 0.484 | -1.02 |
| PA0563_at      | 442.30  | 715.25  | 0.008 | -1.62 |
| PA0564_at      | 51.38   | 44.25   | 0.230 | 1.16  |
| PA0565_at      | 23.36   | 20.40   | 0.413 | 1.15  |
| PA0566_at      | 60.92   | 59.50   | 0.817 | 1.02  |
| PA0567_i_at    | 22.18   | 15.00   | 0.349 | 1.48  |
| PA0568_at      | 50.60   | 53.70   | 0.817 | -1.06 |
| PA0569_at      | 45.90   | 86.40   | 0.008 | -1.88 |
| PA0570_at      | 79.10   | 80.78   | 0.817 | -1.02 |
| PA0571_at      | 101.48  | 121.38  | 0.151 | -1.20 |
| PA0572_at      | 60.98   | 47.62   | 0.008 | 1.28  |
| PA0573_at      | 5.98    | 3.45    | 0.087 | 1.73  |
| PA0574_at      | 66.12   | 74.00   | 0.484 | -1.12 |
| PA0575_at      | 6.78    | 9.00    | 0.484 | -1.33 |
| PA0576_rpoD_at | 1462.74 | 1552.15 | 0.238 | -1.06 |
| PA0577_dnaG_at | 370.00  | 265.08  | 0.008 | 1.40  |
| PA0578_at      | 774.74  | 648.95  | 0.349 | 1.19  |
| PA0579_rpsU_at | 857.38  | 1630.68 | 0.008 | -1.90 |
| PA0580_gcp_at  | 89.92   | 130.23  | 0.008 | -1.45 |
| PA0581_i_at    | 51.16   | 52.13   | 0.484 | -1.02 |
| PA0582_folB_at | 27.72   | 66.15   | 0.008 | -2.39 |
| PA0583_at      | 30.58   | 45.72   | 0.008 | -1.50 |
| PA0584_cca_at  | 35.02   | 32.38   | 0.230 | 1.08  |
| PA0585_at      | 5.38    | 5.97    | 0.484 | -1.11 |
| PA0586_at      | 62.10   | 26.38   | 0.008 | 2.35  |
| PA0587_at      | 43.36   | 16.88   | 0.008 | 2.57  |
| PA0588_at      | 195.20  | 113.10  | 0.008 | 1.73  |
| PA0589_at      | 146.04  | 161.57  | 0.151 | -1.11 |
| PA0590_apaH_at | 465.70  | 314.27  | 0.008 | 1.48  |
| PA0591_at      | 343.38  | 308.13  | 0.048 | 1.11  |
| PA0592_ksgA_at | 358.84  | 341.45  | 0.817 | 1.05  |
| PA0593_pdxA_at | 220.72  | 201.68  | 0.643 | 1.09  |
| PA0594_surA_at | 788.90  | 696.83  | 0.008 | 1.13  |
| PA0595_ostA_at | 1869.20 | 1460.27 | 0.008 | 1.28  |
| PA0596_at      | 157.58  | 195.23  | 0.048 | -1.24 |
| PA0597_at      | 53.88   | 64.65   | 0.063 | -1.20 |
| PA0598_at      | 70.78   | 84.88   | 0.048 | -1.20 |
| PA0599_at      | 60.62   | 60.20   | 1.000 | 1.01  |
| PA0600_at      | 25.56   | 20.30   | 0.151 | 1.26  |
| PA0601_at      | 49.58   | 50.72   | 0.643 | -1.02 |
| PA0602_at      | 42.18   | 24.58   | 0.008 | 1.72  |
| PA0603_at      | 34.32   | 45.07   | 0.008 | -1.31 |
| PA0604_at      | 25.42   | 20.65   | 0.151 | 1.23  |
| PA0605_at      | 24.32   | 14.58   | 0.024 | 1.67  |
| PA0606_at      | 12.84   | 13.33   | 0.349 | -1.04 |
| PA0607_rpe_at  | 191.16  | 213.10  | 0.024 | -1.11 |

## Supplementary Table 1. Probe set signal data for experimental and control samples

|                |         |        |       |       |
|----------------|---------|--------|-------|-------|
| PA0608_at      | 408.62  | 465.38 | 0.151 | -1.14 |
| PA0609_trpE_at | 92.86   | 117.15 | 0.008 | -1.26 |
| PA0610_prtN_at | 103.66  | 72.15  | 0.151 | 1.44  |
| PA0611_prtR_at | 147.18  | 109.20 | 0.008 | 1.35  |
| PA0612_i_at    | 941.52  | 177.77 | 0.008 | 5.30  |
| PA0613_at      | 220.38  | 96.13  | 0.008 | 2.29  |
| PA0614_at      | 635.46  | 220.03 | 0.008 | 2.89  |
| PA0615_at      | 707.96  | 169.10 | 0.008 | 4.19  |
| PA0616_at      | 1177.10 | 336.00 | 0.008 | 3.50  |
| PA0617_at      | 708.94  | 211.50 | 0.008 | 3.35  |
| PA0618_at      | 1085.44 | 350.05 | 0.008 | 3.10  |
| PA0619_at      | 1189.22 | 392.45 | 0.008 | 3.03  |
| PA0620_at      | 1328.84 | 313.42 | 0.008 | 4.24  |
| PA0621_at      | 1909.64 | 742.50 | 0.008 | 2.57  |
| PA0622_at      | 2536.46 | 833.83 | 0.008 | 3.04  |
| PA0623_at      | 2053.48 | 740.50 | 0.008 | 2.77  |
| PA0624_at      | 960.46  | 382.80 | 0.008 | 2.51  |
| PA0625_at      | 537.44  | 159.45 | 0.008 | 3.37  |
| PA0626_at      | 633.52  | 272.57 | 0.008 | 2.32  |
| PA0627_at      | 630.28  | 270.02 | 0.008 | 2.33  |
| PA0628_at      | 652.18  | 297.42 | 0.008 | 2.19  |
| PA0629_at      | 407.90  | 154.82 | 0.008 | 2.63  |
| PA0630_at      | 416.12  | 211.90 | 0.008 | 1.96  |
| PA0631_at      | 294.56  | 128.25 | 0.008 | 2.30  |
| PA0632_at      | 270.78  | 143.80 | 0.008 | 1.88  |
| PA0633_at      | 1979.86 | 596.63 | 0.008 | 3.32  |
| PA0634_at      | 589.38  | 169.75 | 0.008 | 3.47  |
| PA0635_at      | 836.88  | 232.25 | 0.008 | 3.60  |
| PA0636_at      | 1278.80 | 380.55 | 0.008 | 3.36  |
| PA0637_at      | 589.80  | 178.42 | 0.008 | 3.31  |
| PA0638_at      | 908.58  | 283.90 | 0.008 | 3.20  |
| PA0639_at      | 617.88  | 209.70 | 0.008 | 2.95  |
| PA0640_at      | 141.98  | 55.60  | 0.008 | 2.55  |
| PA0641_at      | 509.66  | 102.02 | 0.008 | 5.00  |
| PA0642_at      | 45.10   | 16.23  | 0.008 | 2.78  |
| PA0643_at      | 135.54  | 65.72  | 0.008 | 2.06  |
| PA0644_at      | 210.30  | 119.28 | 0.008 | 1.76  |
| PA0645_at      | 222.88  | 88.80  | 0.008 | 2.51  |
| PA0646_at      | 158.00  | 64.23  | 0.008 | 2.46  |
| PA0647_at      | 50.84   | 39.95  | 0.341 | 1.27  |
| PA0648_at      | 143.44  | 94.75  | 0.024 | 1.51  |
| PA0649_trpG_at | 414.22  | 353.92 | 0.151 | 1.17  |
| PA0650_trpD_at | 270.24  | 251.15 | 0.643 | 1.08  |
| PA0651_trpC_at | 310.02  | 190.35 | 0.008 | 1.63  |
| PA0652_vfr_at  | 940.92  | 783.53 | 0.048 | 1.20  |
| PA0653_at      | 62.44   | 113.20 | 0.008 | -1.81 |
| PA0654_speD_at | 416.94  | 804.38 | 0.008 | -1.93 |
| PA0655_at      | 210.64  | 182.10 | 0.008 | 1.16  |
| PA0656_at      | 33.50   | 34.00  | 0.817 | -1.01 |
| PA0657_at      | 69.14   | 55.63  | 0.087 | 1.24  |
| PA0658_at      | 114.56  | 109.98 | 0.643 | 1.04  |

## Supplementary Table 1. Probe set signal data for experimental and control samples

|                 |        |        |       |       |
|-----------------|--------|--------|-------|-------|
| PA0659_at       | 581.30 | 411.33 | 0.008 | 1.41  |
| PA0660_at       | 212.32 | 135.38 | 0.008 | 1.57  |
| PA0661_at       | 401.74 | 390.92 | 1.000 | 1.03  |
| PA0662_argC_at  | 163.60 | 181.77 | 0.087 | -1.11 |
| PA0663_at       | 132.40 | 194.13 | 0.008 | -1.47 |
| PA0664_at       | 136.98 | 161.02 | 0.349 | -1.18 |
| PA0665_at       | 122.40 | 171.88 | 0.024 | -1.40 |
| PA0666_at       | 102.18 | 89.85  | 0.349 | 1.14  |
| PA0667_at       | 345.88 | 416.77 | 0.151 | -1.20 |
| PA0668_tyrZ_at  | 262.62 | 334.98 | 0.008 | -1.28 |
| PA0669_at       | 59.36  | 20.92  | 0.008 | 2.84  |
| PA0670_at       | 107.54 | 11.42  | 0.008 | 9.42  |
| PA0671_at       | 127.50 | 25.42  | 0.008 | 5.02  |
| PA0672_at       | 30.46  | 38.20  | 0.349 | -1.25 |
| PA0673_at       | 23.54  | 16.97  | 0.484 | 1.39  |
| PA0674_at       | 12.20  | 9.30   | 0.643 | 1.31  |
| PA0675_at       | 15.36  | 15.75  | 0.643 | -1.03 |
| PA0676_at       | 15.02  | 10.60  | 0.151 | 1.42  |
| PA0677_at       | 2.90   | 5.52   | 0.087 | -1.90 |
| PA0678_i_at     | 11.44  | 4.82   | 0.151 | 2.37  |
| PA0679_at       | 16.40  | 14.23  | 0.238 | 1.15  |
| PA0680_at       | 8.42   | 10.90  | 0.556 | -1.29 |
| PA0681_at       | 14.80  | 10.60  | 0.151 | 1.40  |
| PA0682_at       | 15.98  | 13.73  | 0.817 | 1.16  |
| PA0683_at       | 9.78   | 5.85   | 0.349 | 1.67  |
| PA0684_at       | 20.98  | 11.80  | 0.151 | 1.78  |
| PA0685_at       | 5.74   | 5.35   | 0.817 | 1.07  |
| PA0686_at       | 13.10  | 11.17  | 0.413 | 1.17  |
| PA0687_at       | 15.96  | 4.80   | 0.063 | 3.32  |
| PA0688_at       | 8.58   | 4.98   | 0.238 | 1.72  |
| PA0689_at       | 14.94  | 11.90  | 0.484 | 1.26  |
| PA0690_at       | 4.20   | 1.50   | 0.063 | 2.80  |
| PA0691_at       | 13.66  | 9.75   | 0.238 | 1.40  |
| PA0692_at       | 22.86  | 10.60  | 0.008 | 2.16  |
| PA0693_exbB2_at | 11.82  | 11.43  | 0.817 | 1.03  |
| PA0694_exbD2_at | 24.88  | 30.88  | 0.643 | -1.24 |
| PA0695_at       | 6.62   | 4.15   | 0.817 | 1.60  |
| PA0696_at       | 11.90  | 2.35   | 0.087 | 5.06  |
| PA0697_at       | 7.42   | 11.80  | 0.151 | -1.59 |
| PA0698_at       | 11.96  | 13.38  | 1.000 | -1.12 |
| PA0699_at       | 16.34  | 21.30  | 0.048 | -1.30 |
| PA0700_at       | 10.44  | 18.25  | 0.151 | -1.75 |
| PA0701_at       | 3.24   | 4.65   | 0.643 | -1.44 |
| PA0702_at       | 7.74   | 7.27   | 0.817 | 1.06  |
| PA0703_at       | 39.60  | 42.00  | 0.643 | -1.06 |
| PA0704_at       | 32.36  | 29.90  | 0.349 | 1.08  |
| PA0705_at       | 402.62 | 342.02 | 0.151 | 1.18  |
| PA0706_cat_at   | 123.90 | 164.20 | 0.016 | -1.33 |
| PA0707_toxR_at  | 32.18  | 24.52  | 0.024 | 1.31  |
| PA0708_at       | 69.66  | 71.30  | 1.000 | -1.02 |
| PA0709_at       | 12.72  | 16.75  | 0.238 | -1.32 |

### Supplementary Table 1. Probe set signal data for experimental and control samples

|                 |         |        |       |       |
|-----------------|---------|--------|-------|-------|
| PA0710_gloA2_at | 8.50    | 9.15   | 0.643 | -1.08 |
| PA0711_at       | 14.56   | 13.32  | 0.730 | 1.09  |
| PA0712_at       | 41.68   | 31.55  | 0.048 | 1.32  |
| PA0713_at       | 24.38   | 21.27  | 0.413 | 1.15  |
| PA0714_at       | 4.68    | 3.10   | 0.730 | 1.51  |
| PA0715_at       | 26.84   | 12.50  | 0.087 | 2.15  |
| PA0716_at       | 6.32    | 3.03   | 0.484 | 2.09  |
| PA0717_at       | 5788.04 | 349.48 | 0.087 | 16.56 |
| PA0718_at       | 5242.88 | 334.15 | 0.151 | 15.69 |
| PA0719_at       | 4110.20 | 215.20 | 0.151 | 19.10 |
| PA0720_at       | 7289.32 | 751.30 | 0.151 | 9.70  |
| PA0721_r_at     | 4921.56 | 252.35 | 0.151 | 19.50 |
| PA0722_at       | 7302.12 | 954.47 | 0.151 | 7.65  |
| PA0723_coaB_at  | 6924.28 | 602.40 | 0.087 | 11.49 |
| PA0724_at       | 3359.20 | 98.75  | 0.087 | 34.02 |
| PA0725_at       | 859.52  | 34.30  | 0.151 | 25.06 |
| PA0726_at       | 2952.62 | 104.85 | 0.087 | 28.16 |
| PA0727_at       | 2308.50 | 106.72 | 0.151 | 21.63 |
| PA0728_at       | 453.36  | 26.07  | 0.048 | 17.39 |
| PA0729_at       | 256.82  | 89.28  | 0.151 | 2.88  |
| PA0730_at       | 351.64  | 347.65 | 0.643 | 1.01  |
| PA0731_at       | 49.42   | 54.78  | 0.151 | -1.11 |
| PA0732_at       | 37.92   | 44.05  | 0.643 | -1.16 |
| PA0733_at       | 76.06   | 85.07  | 0.349 | -1.12 |
| PA0734_i_at     | 149.12  | 141.65 | 0.817 | 1.05  |
| PA0735_at       | 119.76  | 122.80 | 0.817 | -1.03 |
| PA0736_at       | 93.12   | 78.53  | 0.024 | 1.19  |
| PA0737_at       | 7.86    | 6.00   | 0.349 | 1.31  |
| PA0738_at       | 20.54   | 15.42  | 0.286 | 1.33  |
| PA0739_at       | 33.26   | 35.13  | 0.484 | -1.06 |
| PA0740_at       | 8.12    | 10.35  | 0.556 | -1.27 |
| PA0741_at       | 7.92    | 20.60  | 0.008 | -2.60 |
| PA0742_at       | 15.40   | 25.38  | 0.048 | -1.65 |
| PA0743_at       | 9.40    | 9.90   | 0.817 | -1.05 |
| PA0744_at       | 246.50  | 137.40 | 0.008 | 1.79  |
| PA0745_at       | 513.24  | 168.75 | 0.008 | 3.04  |
| PA0746_at       | 121.86  | 39.78  | 0.008 | 3.06  |
| PA0747_at       | 68.10   | 28.17  | 0.008 | 2.42  |
| PA0748_at       | 3.74    | 6.35   | 0.238 | -1.70 |
| PA0749_at       | 53.52   | 68.05  | 0.048 | -1.27 |
| PA0750_ung_at   | 124.18  | 148.13 | 0.024 | -1.19 |
| PA0751_at       | 22.72   | 21.72  | 0.484 | 1.05  |
| PA0752_at       | 36.06   | 34.80  | 1.000 | 1.04  |
| PA0753_at       | 19.66   | 14.27  | 0.151 | 1.38  |
| PA0754_at       | 50.46   | 51.47  | 0.643 | -1.02 |
| PA0755_at       | 29.64   | 29.92  | 0.817 | -1.01 |
| PA0756_at       | 86.28   | 73.50  | 0.151 | 1.17  |
| PA0757_at       | 82.78   | 74.70  | 0.238 | 1.11  |
| PA0758_at       | 117.08  | 196.27 | 0.048 | -1.68 |
| PA0759_at       | 151.12  | 148.98 | 0.810 | 1.01  |
| PA0760_at       | 86.58   | 138.48 | 0.008 | -1.60 |

### Supplementary Table 1. Probe set signal data for experimental and control samples

|                |         |         |       |       |
|----------------|---------|---------|-------|-------|
| PA0761_nadB_at | 142.28  | 152.75  | 0.087 | -1.07 |
| PA0762_algU_at | 864.06  | 837.63  | 0.643 | 1.03  |
| PA0763_mucA_at | 752.78  | 587.60  | 0.008 | 1.28  |
| PA0764_mucB_at | 203.10  | 142.07  | 0.008 | 1.43  |
| PA0765_mucC_at | 231.00  | 263.05  | 0.087 | -1.14 |
| PA0766_mucD_at | 338.40  | 512.15  | 0.008 | -1.51 |
| PA0767_lepA_at | 279.86  | 371.05  | 0.008 | -1.33 |
| PA0768_lepB_at | 340.76  | 464.05  | 0.008 | -1.36 |
| PA0769_at      | 210.62  | 338.33  | 0.008 | -1.61 |
| PA0770_rnc_at  | 334.28  | 454.40  | 0.048 | -1.36 |
| PA0771_era_at  | 287.58  | 350.65  | 0.087 | -1.22 |
| PA0772_recO_at | 39.32   | 39.95   | 0.817 | -1.02 |
| PA0773_pdxJ_at | 68.24   | 99.75   | 0.008 | -1.46 |
| PA0774_at      | 46.42   | 76.30   | 0.048 | -1.64 |
| PA0775_at      | 151.66  | 174.08  | 0.087 | -1.15 |
| PA0776_at      | 21.86   | 11.32   | 0.087 | 1.93  |
| PA0777_at      | 114.40  | 53.47   | 0.024 | 2.14  |
| PA0778_at      | 171.88  | 158.60  | 0.087 | 1.08  |
| PA0779_at      | 489.82  | 459.05  | 0.817 | 1.07  |
| PA0780_at      | 78.88   | 59.05   | 0.008 | 1.34  |
| PA0781_at      | 40.34   | 38.70   | 0.643 | 1.04  |
| PA0782_putA_at | 3614.68 | 2152.15 | 0.008 | 1.68  |
| PA0783_putP_at | 2126.62 | 1222.43 | 0.008 | 1.74  |
| PA0784_at      | 72.48   | 52.70   | 0.008 | 1.38  |
| PA0785_at      | 14.14   | 19.15   | 0.048 | -1.35 |
| PA0786_at      | 7.90    | 7.60    | 1.000 | 1.04  |
| PA0787_at      | 73.14   | 64.20   | 0.151 | 1.14  |
| PA0788_at      | 29.34   | 28.23   | 0.817 | 1.04  |
| PA0789_at      | 371.96  | 499.85  | 0.151 | -1.34 |
| PA0790_at      | 7.96    | 6.75    | 1.000 | 1.18  |
| PA0791_at      | 40.16   | 43.52   | 0.238 | -1.08 |
| PA0792_prpD_at | 84.80   | 73.25   | 0.484 | 1.16  |
| PA0793_at      | 447.26  | 301.88  | 0.151 | 1.48  |
| PA0794_at      | 343.54  | 239.43  | 0.151 | 1.43  |
| PA0795_prpC_at | 1137.02 | 809.10  | 0.087 | 1.41  |
| PA0796_prpB_at | 758.96  | 496.38  | 0.087 | 1.53  |
| PA0797_at      | 372.34  | 317.23  | 0.643 | 1.17  |
| PA0798_at      | 16.04   | 13.12   | 1.000 | 1.22  |
| PA0799_at      | 44.80   | 57.47   | 0.151 | -1.28 |
| PA0800_at      | 24.26   | 32.35   | 0.048 | -1.33 |
| PA0801_at      | 63.54   | 68.02   | 0.484 | -1.07 |
| PA0802_i_at    | 46.42   | 43.73   | 1.000 | 1.06  |
| PA0803_at      | 8.20    | 17.52   | 0.008 | -2.14 |
| PA0804_at      | 49.82   | 59.97   | 0.024 | -1.20 |
| PA0805_at      | 136.64  | 54.77   | 0.151 | 2.49  |
| PA0806_i_at    | 12.72   | 13.13   | 0.643 | -1.03 |
| PA0807_at      | 82.70   | 74.38   | 0.484 | 1.11  |
| PA0808_at      | 15.60   | 10.05   | 0.151 | 1.55  |
| PA0809_at      | 22.00   | 17.73   | 0.413 | 1.24  |
| PA0810_at      | 45.64   | 31.65   | 0.008 | 1.44  |
| PA0811_at      | 4.94    | 3.23    | 1.000 | 1.53  |



### Supplementary Table 1. Probe set signal data for experimental and control samples

|                 |        |        |       |       |
|-----------------|--------|--------|-------|-------|
| PA0812_at       | 21.84  | 17.73  | 0.063 | 1.23  |
| PA0813_at       | 19.64  | 27.75  | 0.048 | -1.41 |
| PA0814_i_at     | 14.82  | 16.40  | 0.643 | -1.11 |
| PA0815_at       | 35.66  | 28.78  | 0.238 | 1.24  |
| PA0816_at       | 26.06  | 24.02  | 0.817 | 1.08  |
| PA0817_at       | 34.98  | 29.50  | 0.484 | 1.19  |
| PA0818_at       | 30.06  | 30.38  | 1.000 | -1.01 |
| PA0819_f_at     | 20.40  | 34.28  | 0.238 | -1.68 |
| PA0820_at       | 51.22  | 76.82  | 0.008 | -1.50 |
| PA0821_at       | 34.12  | 34.40  | 0.643 | -1.01 |
| PA0822_at       | 15.84  | 16.50  | 0.817 | -1.04 |
| PA0823_at       | 5.46   | 7.58   | 0.556 | -1.39 |
| PA0824_at       | 16.90  | 16.70  | 0.643 | 1.01  |
| PA0825_at       | 3.66   | 5.05   | 0.413 | -1.38 |
| PA0826_at       | 26.20  | 23.45  | 0.484 | 1.12  |
| PA0827_at       | 66.48  | 58.93  | 0.048 | 1.13  |
| PA0828_at       | 19.40  | 19.17  | 0.817 | 1.01  |
| PA0829_at       | 16.16  | 13.63  | 0.817 | 1.19  |
| PA0830_at       | 42.48  | 32.80  | 0.048 | 1.30  |
| PA0831_oruR_at  | 285.58 | 147.73 | 0.008 | 1.93  |
| PA0832_at       | 188.44 | 187.98 | 0.817 | 1.00  |
| PA0833_at       | 385.64 | 395.00 | 0.817 | -1.02 |
| PA0834_at       | 49.72  | 68.15  | 0.048 | -1.37 |
| PA0835_pta_at   | 228.62 | 178.85 | 0.087 | 1.28  |
| PA0836_at       | 315.28 | 245.17 | 0.087 | 1.29  |
| PA0837_slyD_at  | 359.32 | 588.30 | 0.008 | -1.64 |
| PA0838_at       | 131.34 | 163.38 | 0.349 | -1.24 |
| PA0839_at       | 45.24  | 35.45  | 0.341 | 1.28  |
| PA0840_at       | 40.40  | 41.85  | 0.905 | -1.04 |
| PA0841_at       | 80.84  | 49.15  | 0.024 | 1.64  |
| PA0842_at       | 13.66  | 17.35  | 0.238 | -1.27 |
| PA0843_plcR_at  | 14.26  | 11.73  | 0.905 | 1.22  |
| PA0844_plcH_at  | 8.06   | 7.48   | 0.643 | 1.08  |
| PA0845_at       | 3.74   | 6.20   | 0.413 | -1.66 |
| PA0846_at       | 60.88  | 46.07  | 0.048 | 1.32  |
| PA0847_at       | 35.90  | 12.85  | 0.008 | 2.79  |
| PA0848_at       | 75.80  | 115.07 | 0.008 | -1.52 |
| PA0849_trxB2_at | 51.08  | 77.88  | 0.024 | -1.52 |
| PA0850_at       | 19.60  | 13.20  | 0.048 | 1.48  |
| PA0851_at       | 49.36  | 36.05  | 0.008 | 1.37  |
| PA0852_cpbD_at  | 154.68 | 174.85 | 0.484 | -1.13 |
| PA0853_at       | 83.76  | 73.85  | 0.484 | 1.13  |
| PA0854_fumC2_at | 108.46 | 91.20  | 0.151 | 1.19  |
| PA0855_at       | 160.50 | 153.00 | 0.817 | 1.05  |
| PA0856_at       | 690.50 | 860.92 | 0.008 | -1.25 |
| PA0857_bolA_at  | 313.88 | 378.63 | 0.151 | -1.21 |
| PA0858_at       | 179.06 | 277.92 | 0.008 | -1.55 |
| PA0859_at       | 93.96  | 82.65  | 0.238 | 1.14  |
| PA0860_at       | 72.98  | 65.68  | 0.556 | 1.11  |
| PA0861_at       | 49.58  | 32.63  | 0.008 | 1.52  |
| PA0862_at       | 191.40 | 133.05 | 0.024 | 1.44  |

### Supplementary Table 1. Probe set signal data for experimental and control samples

|                 |         |         |       |       |
|-----------------|---------|---------|-------|-------|
| PA0863_at       | 2.90    | 4.18    | 0.349 | -1.44 |
| PA0864_at       | 25.10   | 24.18   | 0.484 | 1.04  |
| PA0865_hpd_at   | 2186.32 | 1528.60 | 0.008 | 1.43  |
| PA0866_aroP2_at | 780.40  | 343.60  | 0.008 | 2.27  |
| PA0867_at       | 263.38  | 247.77  | 0.817 | 1.06  |
| PA0868_at       | 55.20   | 47.38   | 0.087 | 1.17  |
| PA0869_pbpG_at  | 214.06  | 184.20  | 0.008 | 1.16  |
| PA0870_phhC_at  | 2953.46 | 2060.13 | 0.008 | 1.43  |
| PA0871_phhB_at  | 2395.84 | 1881.25 | 0.008 | 1.27  |
| PA0872_phhA_at  | 2831.98 | 1935.43 | 0.008 | 1.46  |
| PA0873_phhR_at  | 40.60   | 17.38   | 0.008 | 2.34  |
| PA0874_at       | 19.44   | 8.53    | 0.048 | 2.28  |
| PA0875_at       | 11.88   | 12.50   | 0.643 | -1.05 |
| PA0876_at       | 99.82   | 97.62   | 1.000 | 1.02  |
| PA0877_at       | 13.70   | 32.30   | 0.024 | -2.36 |
| PA0878_at       | 11.60   | 12.75   | 0.643 | -1.10 |
| PA0879_at       | 2.84    | 3.15    | 0.484 | -1.11 |
| PA0880_at       | 15.44   | 10.63   | 0.349 | 1.45  |
| PA0881_at       | 14.46   | 16.63   | 0.484 | -1.15 |
| PA0882_at       | 19.98   | 8.05    | 0.024 | 2.48  |
| PA0883_at       | 5.22    | 7.30    | 0.349 | -1.40 |
| PA0884_at       | 10.48   | 9.73    | 0.730 | 1.08  |
| PA0885_at       | 6.24    | 1.97    | 0.349 | 3.17  |
| PA0886_at       | 7.46    | 8.73    | 0.556 | -1.17 |
| PA0887_acsA_at  | 1639.96 | 803.35  | 0.024 | 2.04  |
| PA0888_aotJ_at  | 925.60  | 882.88  | 0.643 | 1.05  |
| PA0889_aotQ_at  | 276.76  | 237.57  | 0.151 | 1.16  |
| PA0890_aotM_at  | 319.10  | 342.15  | 0.151 | -1.07 |
| PA0891_at       | 432.24  | 376.83  | 0.048 | 1.15  |
| PA0892_aotP_at  | 633.78  | 703.35  | 0.238 | -1.11 |
| PA0893_argR_at  | 249.86  | 210.25  | 0.087 | 1.19  |
| PA0894_at       | 15.22   | 11.47   | 0.151 | 1.33  |
| PA0895_aruC_at  | 912.64  | 609.38  | 0.008 | 1.50  |
| PA0896_aruF_at  | 291.12  | 402.58  | 0.024 | -1.38 |
| PA0897_aruG_at  | 345.70  | 324.00  | 0.349 | 1.07  |
| PA0898_aruD_at  | 359.72  | 317.75  | 0.087 | 1.13  |
| PA0899_aruB_at  | 442.84  | 443.55  | 1.000 | -1.00 |
| PA0900_at       | 1497.06 | 1346.63 | 0.048 | 1.11  |
| PA0901_aruE_at  | 292.96  | 288.83  | 0.643 | 1.01  |
| PA0902_at       | 129.66  | 117.88  | 0.643 | 1.10  |
| PA0903_alaS_at  | 334.98  | 373.28  | 0.238 | -1.11 |
| PA0904_lysC_at  | 468.76  | 625.98  | 0.008 | -1.34 |
| PA0905_csrA_at  | 124.68  | 315.30  | 0.008 | -2.53 |
| PA0906_at       | 72.76   | 44.03   | 0.087 | 1.65  |
| PA0907_at       | 43.68   | 29.40   | 0.048 | 1.49  |
| PA0908_at       | 23.12   | 20.45   | 0.643 | 1.13  |
| PA0909_i_at     | 30.96   | 38.85   | 0.087 | -1.25 |
| PA0910_at       | 66.52   | 65.97   | 0.643 | 1.01  |
| PA0911_at       | 95.74   | 83.90   | 0.238 | 1.14  |
| PA0912_at       | 12.72   | 19.90   | 0.349 | -1.56 |
| PA0913_mgtE_at  | 323.94  | 310.60  | 0.643 | 1.04  |

## Supplementary Table 1. Probe set signal data for experimental and control samples

|                |         |         |       |       |
|----------------|---------|---------|-------|-------|
| PA0914_at      | 18.16   | 41.78   | 0.008 | -2.30 |
| PA0915_at      | 79.78   | 155.77  | 0.008 | -1.95 |
| PA0916_at      | 145.50  | 313.15  | 0.008 | -2.15 |
| PA0917_kup_at  | 81.78   | 116.63  | 0.008 | -1.43 |
| PA0918_at      | 78.38   | 120.33  | 0.008 | -1.54 |
| PA0919_at      | 112.10  | 102.85  | 0.151 | 1.09  |
| PA0920_at      | 61.90   | 62.98   | 1.000 | -1.02 |
| PA0921_at      | 103.28  | 173.20  | 0.008 | -1.68 |
| PA0922_at      | 431.28  | 115.50  | 0.008 | 3.73  |
| PA0923_dinP_at | 94.28   | 71.07   | 0.048 | 1.33  |
| PA0924_at      | 24.92   | 30.47   | 0.484 | -1.22 |
| PA0925_at      | 152.38  | 142.35  | 0.484 | 1.07  |
| PA0926_at      | 262.22  | 233.30  | 0.349 | 1.12  |
| PA0927_ldhA_at | 155.80  | 105.23  | 0.008 | 1.48  |
| PA0928_at      | 53.62   | 51.92   | 0.817 | 1.03  |
| PA0929_at      | 38.22   | 53.30   | 0.008 | -1.39 |
| PA0930_at      | 24.28   | 21.98   | 0.643 | 1.10  |
| PA0931_at      | 21.58   | 17.53   | 0.643 | 1.23  |
| PA0932_cysM_at | 409.10  | 410.33  | 0.484 | -1.00 |
| PA0933_ygcA_at | 200.20  | 231.48  | 0.048 | -1.16 |
| PA0934_relA_at | 262.68  | 346.97  | 0.008 | -1.32 |
| PA0935_at      | 122.58  | 125.82  | 0.643 | -1.03 |
| PA0936_at      | 69.56   | 104.15  | 0.008 | -1.50 |
| PA0937_at      | 299.58  | 558.22  | 0.008 | -1.86 |
| PA0938_at      | 147.72  | 266.43  | 0.008 | -1.80 |
| PA0939_at      | 2.74    | 4.13    | 0.349 | -1.51 |
| PA0940_at      | 29.82   | 35.25   | 0.238 | -1.18 |
| PA0941_at      | 31.02   | 28.48   | 0.817 | 1.09  |
| PA0942_at      | 35.48   | 39.72   | 0.643 | -1.12 |
| PA0943_at      | 623.12  | 801.55  | 0.024 | -1.29 |
| PA0944_purN_at | 250.88  | 286.45  | 0.238 | -1.14 |
| PA0945_purM_at | 464.96  | 614.35  | 0.024 | -1.32 |
| PA0946_at      | 160.60  | 108.00  | 0.008 | 1.49  |
| PA0947_at      | 126.54  | 156.15  | 0.048 | -1.23 |
| PA0948_at      | 114.62  | 115.35  | 1.000 | -1.01 |
| PA0949_wrbA_at | 295.64  | 300.48  | 0.817 | -1.02 |
| PA0950_at      | 351.22  | 435.80  | 0.008 | -1.24 |
| PA0951_at      | 37.68   | 25.52   | 0.024 | 1.48  |
| PA0952_at      | 44.18   | 36.10   | 0.238 | 1.22  |
| PA0953_at      | 65.02   | 64.35   | 0.817 | 1.01  |
| PA0954_at      | 18.50   | 20.27   | 0.905 | -1.10 |
| PA0955_at      | 219.16  | 254.97  | 0.238 | -1.16 |
| PA0956_proS_at | 740.78  | 719.55  | 0.643 | 1.03  |
| PA0957_at      | 13.82   | 9.30    | 0.151 | 1.49  |
| PA0958_oprD_at | 1913.82 | 1684.07 | 0.087 | 1.14  |
| PA0959_at      | 113.10  | 126.22  | 0.151 | -1.12 |
| PA0960_at      | 186.20  | 186.48  | 0.643 | -1.00 |
| PA0961_at      | 200.48  | 256.88  | 0.024 | -1.28 |
| PA0962_at      | 707.78  | 662.75  | 1.000 | 1.07  |
| PA0963_aspS_at | 695.76  | 817.58  | 0.008 | -1.18 |
| PA0964_at      | 472.84  | 815.55  | 0.008 | -1.72 |

### Supplementary Table 1. Probe set signal data for experimental and control samples

|                 |         |         |       |       |
|-----------------|---------|---------|-------|-------|
| PA0965_ruvC_at  | 334.04  | 507.45  | 0.008 | -1.52 |
| PA0966_ruvA_at  | 196.46  | 319.50  | 0.008 | -1.63 |
| PA0967_ruvB_at  | 172.60  | 234.53  | 0.008 | -1.36 |
| PA0968_at       | 342.24  | 538.92  | 0.008 | -1.57 |
| PA0969_tolQ_at  | 604.54  | 822.65  | 0.008 | -1.36 |
| PA0970_tolR_at  | 359.44  | 548.08  | 0.008 | -1.52 |
| PA0971_tolA_at  | 393.68  | 477.85  | 0.024 | -1.21 |
| PA0972_tolB_at  | 890.60  | 1035.60 | 0.048 | -1.16 |
| PA0973_oprL_at  | 1211.02 | 1406.47 | 0.087 | -1.16 |
| PA0974_at       | 663.62  | 585.70  | 0.238 | 1.13  |
| PA0975_at       | 125.78  | 299.52  | 0.008 | -2.38 |
| PA0976_at       | 51.60   | 137.65  | 0.008 | -2.67 |
| PA0977_at       | 2.12    | 7.05    | 0.008 | -3.33 |
| PA0978_s_at     | 31.18   | 28.45   | 0.817 | 1.10  |
| PA0979_s_at     | 9.20    | 20.70   | 0.008 | -2.25 |
| PA0980_at       | 18.88   | 15.15   | 0.643 | 1.25  |
| PA0981_at       | 2.52    | 6.37    | 0.008 | -2.53 |
| PA0982_at       | 25.90   | 21.90   | 0.349 | 1.18  |
| PA0983_at       | 39.92   | 20.13   | 0.024 | 1.98  |
| PA0984_at       | 3.12    | 1.30    | 0.349 | 2.40  |
| PA0985_at       | 86.90   | 45.15   | 0.024 | 1.92  |
| PA0986_i_at     | 4.48    | 0.57    | 0.024 | 7.86  |
| PA0987_at       | 7.92    | 8.80    | 0.817 | -1.11 |
| PA0988_at       | 33.36   | 27.13   | 0.484 | 1.23  |
| PA0989_at       | 24.52   | 40.22   | 0.008 | -1.64 |
| PA0990_at       | 6.00    | 6.13    | 0.635 | -1.02 |
| PA0991_at       | 8.26    | 8.00    | 0.817 | 1.03  |
| PA0992_at       | 21.00   | 36.45   | 0.087 | -1.74 |
| PA0993_at       | 5.50    | 4.60    | 1.000 | 1.20  |
| PA0994_at       | 11.04   | 14.55   | 0.349 | -1.32 |
| PA0995_ogt_at   | 24.94   | 21.88   | 0.349 | 1.14  |
| PA0996_at       | 214.58  | 430.15  | 0.008 | -2.00 |
| PA0997_at       | 476.72  | 820.50  | 0.008 | -1.72 |
| PA0998_at       | 319.06  | 607.78  | 0.008 | -1.90 |
| PA0999_fabH1_at | 434.04  | 770.02  | 0.008 | -1.77 |
| PA1000_at       | 130.58  | 315.80  | 0.008 | -2.42 |
| PA1001_phnA_at  | 129.32  | 257.05  | 0.008 | -1.99 |
| PA1002_phnB_at  | 57.76   | 123.38  | 0.008 | -2.14 |
| PA1003_at       | 71.20   | 115.53  | 0.008 | -1.62 |
| PA1004_nadA_at  | 598.70  | 587.08  | 0.817 | 1.02  |
| PA1005_at       | 173.98  | 135.93  | 0.048 | 1.28  |
| PA1006_at       | 73.74   | 60.95   | 0.643 | 1.21  |
| PA1007_at       | 27.14   | 31.38   | 0.151 | -1.16 |
| PA1008_bcp_at   | 726.58  | 715.65  | 0.643 | 1.02  |
| PA1009_at       | 875.66  | 795.17  | 0.087 | 1.10  |
| PA1010_dapA_at  | 987.14  | 825.70  | 0.024 | 1.20  |
| PA1011_at       | 631.26  | 604.53  | 0.349 | 1.04  |
| PA1012_at       | 71.68   | 118.60  | 0.008 | -1.65 |
| PA1013_purC_at  | 357.62  | 653.95  | 0.008 | -1.83 |
| PA1014_at       | 90.22   | 87.65   | 0.817 | 1.03  |
| PA1015_at       | 101.30  | 90.15   | 0.349 | 1.12  |

### Supplementary Table 1. Probe set signal data for experimental and control samples

|                 |         |         |       |       |
|-----------------|---------|---------|-------|-------|
| PA1016_at       | 55.16   | 45.63   | 0.238 | 1.21  |
| PA1017_pauA_at  | 18.32   | 22.90   | 0.413 | -1.25 |
| PA1018_at       | 29.14   | 26.10   | 0.643 | 1.12  |
| PA1019_muckK_at | 8.48    | 5.08    | 0.349 | 1.67  |
| PA1020_at       | 31.78   | 25.23   | 0.151 | 1.26  |
| PA1021_at       | 25.54   | 21.18   | 0.349 | 1.21  |
| PA1022_at       | 85.16   | 65.38   | 0.087 | 1.30  |
| PA1023_at       | 38.36   | 34.83   | 0.151 | 1.10  |
| PA1024_at       | 28.06   | 43.47   | 0.087 | -1.55 |
| PA1025_at       | 9.98    | 8.68    | 0.817 | 1.15  |
| PA1026_at       | 58.34   | 61.00   | 0.643 | -1.05 |
| PA1027_at       | 32.80   | 34.42   | 0.817 | -1.05 |
| PA1028_at       | 14.92   | 21.55   | 0.048 | -1.44 |
| PA1029_at       | 109.70  | 96.80   | 0.484 | 1.13  |
| PA1030_at       | 56.94   | 45.05   | 0.151 | 1.26  |
| PA1031_at       | 106.26  | 94.78   | 0.413 | 1.12  |
| PA1032_at       | 54.60   | 76.07   | 0.008 | -1.39 |
| PA1033_at       | 136.64  | 130.52  | 0.643 | 1.05  |
| PA1034_at       | 24.34   | 44.17   | 0.008 | -1.81 |
| PA1035_at       | 82.30   | 91.48   | 0.484 | -1.11 |
| PA1036_at       | 74.60   | 59.67   | 0.048 | 1.25  |
| PA1037_at       | 38.22   | 49.15   | 0.087 | -1.29 |
| PA1038_at       | 23.96   | 29.57   | 0.484 | -1.23 |
| PA1039_at       | 125.00  | 88.97   | 0.008 | 1.40  |
| PA1040_at       | 138.36  | 82.53   | 0.008 | 1.68  |
| PA1041_at       | 43.86   | 19.10   | 0.008 | 2.30  |
| PA1042_at       | 53.32   | 54.75   | 0.643 | -1.03 |
| PA1043_at       | 135.40  | 116.07  | 0.048 | 1.17  |
| PA1044_at       | 81.46   | 42.17   | 0.008 | 1.93  |
| PA1045_at       | 201.88  | 136.38  | 0.008 | 1.48  |
| PA1046_at       | 58.72   | 35.42   | 0.024 | 1.66  |
| PA1047_at       | 214.92  | 176.25  | 0.008 | 1.22  |
| PA1048_at       | 319.44  | 399.48  | 0.008 | -1.25 |
| PA1049_pdxH_at  | 178.86  | 186.95  | 0.238 | -1.05 |
| PA1050_at       | 41.78   | 46.03   | 0.349 | -1.10 |
| PA1051_at       | 14.54   | 57.75   | 0.817 | -3.97 |
| PA1052_at       | 10.32   | 21.02   | 0.349 | -2.04 |
| PA1053_at       | 2926.70 | 2130.95 | 0.024 | 1.37  |
| PA1054_at       | 86.60   | 80.30   | 0.349 | 1.08  |
| PA1055_at       | 104.20  | 97.88   | 0.643 | 1.06  |
| PA1056_at       | 79.48   | 70.28   | 0.238 | 1.13  |
| PA1057_at       | 135.52  | 129.05  | 0.484 | 1.05  |
| PA1058_at       | 103.50  | 124.52  | 0.151 | -1.20 |
| PA1059_at       | 74.08   | 86.02   | 0.238 | -1.16 |
| PA1060_at       | 41.70   | 42.22   | 1.000 | -1.01 |
| PA1061_at       | 98.28   | 97.45   | 0.817 | 1.01  |
| PA1062_at       | 50.48   | 57.20   | 0.151 | -1.13 |
| PA1063_at       | 22.54   | 22.17   | 0.817 | 1.02  |
| PA1064_at       | 259.02  | 256.38  | 1.000 | 1.01  |
| PA1065_at       | 18.10   | 18.00   | 0.817 | 1.01  |
| PA1066_at       | 4.00    | 1.75    | 0.151 | 2.29  |

### Supplementary Table 1. Probe set signal data for experimental and control samples

|                |         |         |       |       |
|----------------|---------|---------|-------|-------|
| PA1067_at      | 27.34   | 20.52   | 0.008 | 1.33  |
| PA1068_at      | 546.20  | 395.87  | 0.008 | 1.38  |
| PA1069_at      | 234.26  | 260.35  | 0.484 | -1.11 |
| PA1070_braG_at | 209.40  | 229.38  | 0.643 | -1.10 |
| PA1071_braF_at | 655.00  | 569.92  | 0.238 | 1.15  |
| PA1072_braE_at | 351.78  | 259.85  | 0.048 | 1.35  |
| PA1073_braD_at | 369.24  | 381.50  | 0.817 | -1.03 |
| PA1074_braC_at | 1529.06 | 1154.25 | 0.048 | 1.32  |
| PA1075_at      | 98.34   | 118.32  | 0.024 | -1.20 |
| PA1076_at      | 68.60   | 93.10   | 0.048 | -1.36 |
| PA1077_flgB_at | 386.80  | 246.63  | 0.151 | 1.57  |
| PA1078_flgC_at | 356.34  | 325.90  | 0.087 | 1.09  |
| PA1079_flgD_at | 418.94  | 390.40  | 0.349 | 1.07  |
| PA1080_flgE_at | 879.50  | 771.50  | 0.024 | 1.14  |
| PA1081_flgF_at | 198.14  | 174.05  | 0.349 | 1.14  |
| PA1082_flgG_at | 448.26  | 428.47  | 0.817 | 1.05  |
| PA1083_flgH_at | 164.26  | 158.53  | 0.817 | 1.04  |
| PA1084_flgI_at | 142.30  | 138.02  | 0.817 | 1.03  |
| PA1085_flgJ_at | 171.94  | 149.18  | 0.087 | 1.15  |
| PA1086_flgK_at | 235.80  | 231.30  | 0.817 | 1.02  |
| PA1087_flgL_at | 356.38  | 328.73  | 0.151 | 1.08  |
| PA1088_at      | 117.04  | 145.07  | 0.008 | -1.24 |
| PA1089_at      | 155.80  | 126.13  | 0.048 | 1.24  |
| PA1090_at      | 106.20  | 105.83  | 0.817 | 1.00  |
| PA1091_at      | 118.30  | 125.47  | 0.238 | -1.06 |
| PA1092_fliC_at | 3375.92 | 2972.55 | 0.008 | 1.14  |
| PA1093_at      | 728.88  | 834.47  | 0.087 | -1.14 |
| PA1094_fliD_at | 499.20  | 655.78  | 0.008 | -1.31 |
| PA1095_at      | 467.48  | 675.00  | 0.024 | -1.44 |
| PA1096_at      | 968.54  | 928.30  | 0.643 | 1.04  |
| PA1097_fleQ_at | 325.12  | 289.72  | 0.643 | 1.12  |
| PA1098_fleS_at | 234.46  | 157.57  | 0.008 | 1.49  |
| PA1099_fleR_at | 193.90  | 159.95  | 0.008 | 1.21  |
| PA1100_fliE_at | 263.40  | 220.45  | 0.151 | 1.19  |
| PA1101_fliF_at | 280.92  | 289.60  | 0.643 | -1.03 |
| PA1102_fliG_at | 574.26  | 487.80  | 0.024 | 1.18  |
| PA1103_at      | 288.64  | 234.80  | 0.048 | 1.23  |
| PA1104_fliI_at | 109.62  | 109.93  | 1.000 | -1.00 |
| PA1105_fliJ_at | 40.22   | 38.72   | 0.817 | 1.04  |
| PA1106_at      | 57.00   | 35.98   | 0.008 | 1.58  |
| PA1107_at      | 10.36   | 10.50   | 0.817 | -1.01 |
| PA1108_at      | 8.62    | 8.63    | 0.817 | -1.00 |
| PA1109_at      | 0.86    | 1.00    | 0.270 | -1.16 |
| PA1110_at      | 22.00   | 19.95   | 0.817 | 1.10  |
| PA1111_at      | 12.88   | 17.75   | 0.087 | -1.38 |
| PA1112_at      | 58.56   | 23.25   | 0.008 | 2.52  |
| PA1113_at      | 20.56   | 16.55   | 0.349 | 1.24  |
| PA1114_at      | 44.76   | 49.75   | 0.484 | -1.11 |
| PA1115_at      | 67.90   | 54.30   | 0.087 | 1.25  |
| PA1116_at      | 88.26   | 135.33  | 0.008 | -1.53 |
| PA1117_at      | 37.32   | 54.10   | 0.008 | -1.45 |

### Supplementary Table 1. Probe set signal data for experimental and control samples

|                |         |         |       |       |
|----------------|---------|---------|-------|-------|
| PA1118_at      | 11.94   | 16.83   | 0.151 | -1.41 |
| PA1119_at      | 108.72  | 129.73  | 0.484 | -1.19 |
| PA1120_at      | 34.80   | 30.75   | 0.238 | 1.13  |
| PA1121_at      | 53.88   | 51.12   | 0.905 | 1.05  |
| PA1122_at      | 114.22  | 104.07  | 0.484 | 1.10  |
| PA1123_at      | 18.92   | 34.47   | 0.048 | -1.82 |
| PA1124_dgt_at  | 46.56   | 30.92   | 0.024 | 1.51  |
| PA1125_at      | 49.86   | 39.15   | 0.048 | 1.27  |
| PA1126_at      | 106.42  | 176.10  | 0.008 | -1.65 |
| PA1127_at      | 122.10  | 118.78  | 0.484 | 1.03  |
| PA1128_at      | 50.74   | 60.78   | 0.024 | -1.20 |
| PA1129_at      | 11.36   | 14.45   | 0.341 | -1.27 |
| PA1130_at      | 18.14   | 22.52   | 0.413 | -1.24 |
| PA1131_at      | 22.70   | 20.35   | 0.484 | 1.12  |
| PA1132_at      | 147.42  | 114.23  | 0.024 | 1.29  |
| PA1133_at      | 2.92    | 6.00    | 0.151 | -2.05 |
| PA1134_at      | 21.94   | 22.32   | 1.000 | -1.02 |
| PA1135_at      | 35.94   | 32.05   | 0.238 | 1.12  |
| PA1136_at      | 9.46    | 13.60   | 0.238 | -1.44 |
| PA1137_at      | 14.28   | 14.95   | 1.000 | -1.05 |
| PA1138_at      | 23.18   | 22.47   | 0.817 | 1.03  |
| PA1139_at      | 31.94   | 25.60   | 0.008 | 1.25  |
| PA1140_at      | 61.36   | 67.13   | 0.048 | -1.09 |
| PA1141_at      | 50.12   | 53.50   | 0.643 | -1.07 |
| PA1142_at      | 56.24   | 46.72   | 0.238 | 1.20  |
| PA1143_at      | 10.02   | 15.83   | 0.238 | -1.58 |
| PA1144_at      | 2.10    | 5.07    | 0.048 | -2.41 |
| PA1145_at      | 29.44   | 26.07   | 0.230 | 1.13  |
| PA1146_at      | 28.44   | 15.13   | 0.008 | 1.88  |
| PA1147_at      | 24.20   | 16.35   | 0.151 | 1.48  |
| PA1148_toxA_at | 21.46   | 20.47   | 0.484 | 1.05  |
| PA1149_at      | 51.92   | 61.22   | 0.151 | -1.18 |
| PA1150_pys2_at | 359.30  | 123.93  | 0.008 | 2.90  |
| PA1151_imm2_at | 34.88   | 71.58   | 0.008 | -2.05 |
| PA1152_at      | 17.00   | 18.50   | 0.484 | -1.09 |
| PA1153_at      | 35.92   | 30.03   | 0.151 | 1.20  |
| PA1154_at      | 19.10   | 11.70   | 0.048 | 1.63  |
| PA1155_nrdB_at | 2162.86 | 1895.00 | 0.087 | 1.14  |
| PA1156_nrdA_at | 1371.28 | 1106.53 | 0.048 | 1.24  |
| PA1157_at      | 157.14  | 112.18  | 0.008 | 1.40  |
| PA1158_at      | 37.42   | 31.22   | 0.087 | 1.20  |
| PA1159_at      | 752.46  | 1119.18 | 0.048 | -1.49 |
| PA1160_at      | 117.88  | 135.23  | 0.238 | -1.15 |
| PA1161_rrmA_at | 99.34   | 105.13  | 0.349 | -1.06 |
| PA1162_dapE_at | 276.58  | 273.48  | 0.817 | 1.01  |
| PA1163_at      | 24.58   | 33.43   | 0.048 | -1.36 |
| PA1164_at      | 84.04   | 79.93   | 0.643 | 1.05  |
| PA1165_at      | 46.44   | 75.03   | 0.008 | -1.62 |
| PA1166_at      | 24.68   | 12.35   | 0.008 | 2.00  |
| PA1167_at      | 39.50   | 34.47   | 0.238 | 1.15  |
| PA1168_at      | 3.60    | 14.13   | 0.008 | -3.93 |

### Supplementary Table 1. Probe set signal data for experimental and control samples

|                |         |         |       |       |
|----------------|---------|---------|-------|-------|
| PA1169_at      | 7.40    | 1.55    | 0.024 | 4.77  |
| PA1170_at      | 24.92   | 28.72   | 0.643 | -1.15 |
| PA1171_at      | 74.56   | 75.55   | 0.817 | -1.01 |
| PA1172_napC_at | 11.62   | 19.92   | 0.349 | -1.71 |
| PA1173_napB_at | 30.16   | 15.45   | 0.008 | 1.95  |
| PA1174_napA_at | 27.76   | 26.05   | 0.817 | 1.07  |
| PA1175_napD_at | 39.20   | 32.30   | 0.143 | 1.21  |
| PA1176_napF_at | 19.32   | 12.70   | 0.024 | 1.52  |
| PA1177_napE_at | 12.00   | 5.10    | 0.024 | 2.35  |
| PA1178_oprH_at | 2710.64 | 2888.25 | 0.484 | -1.07 |
| PA1179_phoP_at | 681.22  | 602.28  | 0.048 | 1.13  |
| PA1180_phoQ_at | 319.92  | 279.93  | 0.024 | 1.14  |
| PA1181_at      | 48.44   | 59.07   | 0.048 | -1.22 |
| PA1182_at      | 62.70   | 60.38   | 0.817 | 1.04  |
| PA1183_dctA_at | 22.70   | 15.92   | 0.048 | 1.43  |
| PA1184_at      | 19.40   | 14.43   | 0.643 | 1.34  |
| PA1185_at      | 11.92   | 13.75   | 0.349 | -1.15 |
| PA1186_at      | 7.82    | 8.43    | 0.484 | -1.08 |
| PA1187_at      | 16.12   | 18.98   | 0.484 | -1.18 |
| PA1188_at      | 22.00   | 16.52   | 0.048 | 1.33  |
| PA1189_at      | 55.62   | 61.58   | 0.484 | -1.11 |
| PA1190_at      | 5.68    | 10.05   | 0.008 | -1.77 |
| PA1191_at      | 17.72   | 24.63   | 0.087 | -1.39 |
| PA1192_at      | 329.52  | 360.13  | 0.151 | -1.09 |
| PA1193_at      | 114.00  | 174.73  | 0.008 | -1.53 |
| PA1194_at      | 12.22   | 12.70   | 0.817 | -1.04 |
| PA1195_at      | 17.62   | 20.35   | 0.349 | -1.15 |
| PA1196_at      | 19.84   | 25.20   | 0.349 | -1.27 |
| PA1197_at      | 27.90   | 29.77   | 0.817 | -1.07 |
| PA1198_at      | 1111.94 | 1274.80 | 0.008 | -1.15 |
| PA1199_at      | 235.98  | 376.13  | 0.008 | -1.59 |
| PA1200_at      | 39.86   | 68.45   | 0.008 | -1.72 |
| PA1201_at      | 56.20   | 60.83   | 0.643 | -1.08 |
| PA1202_at      | 116.10  | 130.70  | 0.048 | -1.13 |
| PA1203_at      | 150.96  | 139.20  | 0.484 | 1.08  |
| PA1204_at      | 49.10   | 26.70   | 0.008 | 1.84  |
| PA1205_at      | 65.16   | 41.35   | 0.024 | 1.58  |
| PA1206_at      | 195.40  | 238.35  | 0.087 | -1.22 |
| PA1207_kefB_at | 38.46   | 58.22   | 0.024 | -1.51 |
| PA1208_at      | 15.80   | 18.52   | 0.413 | -1.17 |
| PA1209_at      | 35.78   | 26.03   | 0.024 | 1.37  |
| PA1210_at      | 8.86    | 5.20    | 0.048 | 1.70  |
| PA1211_at      | 8.84    | 4.10    | 0.151 | 2.16  |
| PA1212_at      | 5.80    | 10.73   | 0.048 | -1.85 |
| PA1213_at      | 19.06   | 19.80   | 0.817 | -1.04 |
| PA1214_at      | 23.70   | 17.95   | 0.151 | 1.32  |
| PA1215_at      | 3.90    | 4.00    | 0.643 | -1.03 |
| PA1216_at      | 18.84   | 24.45   | 0.087 | -1.30 |
| PA1217_at      | 8.50    | 14.88   | 0.087 | -1.75 |
| PA1218_at      | 6.94    | 9.63    | 0.349 | -1.39 |
| PA1219_at      | 9.64    | 22.95   | 0.048 | -2.38 |



**Supplementary Table 1. Probe set signal data for experimental and control samples**

|                |        |        |       |       |
|----------------|--------|--------|-------|-------|
| PA1220_at      | 18.14  | 16.68  | 0.413 | 1.09  |
| PA1221_at      | 24.04  | 33.17  | 0.151 | -1.38 |
| PA1222_at      | 101.14 | 103.03 | 0.905 | -1.02 |
| PA1223_at      | 12.78  | 13.77  | 0.817 | -1.08 |
| PA1224_at      | 45.44  | 43.88  | 0.484 | 1.04  |
| PA1225_at      | 22.20  | 26.02  | 0.349 | -1.17 |
| PA1226_at      | 40.02  | 53.30  | 0.238 | -1.33 |
| PA1227_at      | 13.26  | 25.47  | 0.008 | -1.92 |
| PA1228_at      | 184.56 | 509.92 | 0.008 | -2.76 |
| PA1229_at      | 40.56  | 39.18  | 1.000 | 1.04  |
| PA1230_at      | 15.62  | 11.18  | 0.484 | 1.40  |
| PA1231_at      | 15.18  | 10.25  | 0.238 | 1.48  |
| PA1232_at      | 12.86  | 6.72   | 0.087 | 1.91  |
| PA1233_at      | 17.46  | 24.03  | 0.024 | -1.38 |
| PA1234_at      | 45.56  | 40.97  | 0.484 | 1.11  |
| PA1235_at      | 46.86  | 25.48  | 0.008 | 1.84  |
| PA1236_at      | 5.54   | 6.95   | 0.817 | -1.25 |
| PA1237_at      | 21.36  | 25.45  | 0.238 | -1.19 |
| PA1238_at      | 13.64  | 9.13   | 0.817 | 1.49  |
| PA1239_at      | 12.94  | 14.73  | 0.643 | -1.14 |
| PA1240_at      | 15.64  | 14.85  | 1.000 | 1.05  |
| PA1241_at      | 45.14  | 43.13  | 0.484 | 1.05  |
| PA1242_at      | 11.80  | 8.77   | 0.817 | 1.35  |
| PA1243_at      | 73.46  | 63.15  | 0.151 | 1.16  |
| PA1244_at      | 564.76 | 524.70 | 0.190 | 1.08  |
| PA1245_at      | 87.82  | 68.18  | 0.087 | 1.29  |
| PA1246_aprD_at | 31.32  | 22.13  | 0.087 | 1.42  |
| PA1247_aprE_at | 42.28  | 34.95  | 0.151 | 1.21  |
| PA1248_aprF_at | 47.74  | 29.67  | 0.024 | 1.61  |
| PA1249_aprA_at | 17.42  | 16.48  | 0.817 | 1.06  |
| PA1250_aprI_at | 55.20  | 82.85  | 0.008 | -1.50 |
| PA1251_at      | 16.44  | 17.38  | 0.817 | -1.06 |
| PA1252_at      | 25.16  | 21.70  | 0.238 | 1.16  |
| PA1253_at      | 16.34  | 18.17  | 0.484 | -1.11 |
| PA1254_at      | 12.76  | 10.90  | 0.484 | 1.17  |
| PA1255_at      | 23.88  | 23.70  | 0.817 | 1.01  |
| PA1256_at      | 8.70   | 15.55  | 0.238 | -1.79 |
| PA1257_at      | 5.54   | 7.32   | 0.643 | -1.32 |
| PA1258_at      | 11.84  | 8.88   | 0.238 | 1.33  |
| PA1259_at      | 7.94   | 7.02   | 1.000 | 1.13  |
| PA1260_at      | 4.58   | 15.25  | 0.008 | -3.33 |
| PA1261_at      | 28.84  | 20.83  | 0.008 | 1.38  |
| PA1262_at      | 8.06   | 5.50   | 0.484 | 1.47  |
| PA1263_at      | 55.98  | 53.95  | 0.817 | 1.04  |
| PA1264_at      | 10.84  | 13.57  | 0.643 | -1.25 |
| PA1265_at      | 9.14   | 17.45  | 0.008 | -1.91 |
| PA1266_at      | 17.08  | 12.35  | 0.349 | 1.38  |
| PA1267_at      | 5.74   | 8.25   | 0.476 | -1.44 |
| PA1268_at      | 11.48  | 19.47  | 0.048 | -1.70 |
| PA1269_at      | 74.30  | 100.32 | 0.024 | -1.35 |
| PA1270_at      | 10.74  | 15.30  | 0.238 | -1.42 |

## Supplementary Table 1. Probe set signal data for experimental and control samples

|                |         |         |       |       |
|----------------|---------|---------|-------|-------|
| PA1271_at      | 212.60  | 188.55  | 0.484 | 1.13  |
| PA1272_cobO_at | 329.86  | 404.47  | 0.048 | -1.23 |
| PA1273_cobB_at | 124.04  | 142.98  | 0.151 | -1.15 |
| PA1274_at      | 107.40  | 132.13  | 0.024 | -1.23 |
| PA1275_cobD_at | 85.12   | 79.75   | 0.484 | 1.07  |
| PA1276_cobC_at | 88.44   | 104.38  | 0.024 | -1.18 |
| PA1277_cobQ_at | 101.46  | 103.98  | 0.817 | -1.02 |
| PA1278_cobP_at | 157.14  | 165.13  | 0.484 | -1.05 |
| PA1279_cobU_at | 53.98   | 90.05   | 0.008 | -1.67 |
| PA1280_at      | 66.16   | 72.85   | 0.349 | -1.10 |
| PA1281_cobV_at | 43.68   | 60.92   | 0.024 | -1.39 |
| PA1282_at      | 11.64   | 8.60    | 0.643 | 1.35  |
| PA1283_at      | 32.50   | 37.47   | 0.484 | -1.15 |
| PA1284_at      | 15.94   | 6.60    | 0.087 | 2.42  |
| PA1285_at      | 39.66   | 42.20   | 0.817 | -1.06 |
| PA1286_at      | 21.22   | 13.55   | 0.048 | 1.57  |
| PA1287_at      | 35.50   | 42.60   | 0.238 | -1.20 |
| PA1288_at      | 2134.64 | 1963.05 | 0.349 | 1.09  |
| PA1289_at      | 23.98   | 20.02   | 0.349 | 1.20  |
| PA1290_at      | 32.72   | 39.45   | 0.238 | -1.21 |
| PA1291_at      | 24.14   | 20.40   | 0.484 | 1.18  |
| PA1292_at      | 157.90  | 129.75  | 0.087 | 1.22  |
| PA1293_at      | 305.38  | 251.38  | 0.008 | 1.21  |
| PA1294_rnd_at  | 224.36  | 239.70  | 0.484 | -1.07 |
| PA1295_at      | 59.38   | 96.00   | 0.008 | -1.62 |
| PA1296_at      | 108.54  | 73.18   | 0.008 | 1.48  |
| PA1297_at      | 26.76   | 31.05   | 0.349 | -1.16 |
| PA1298_i_at    | 20.16   | 9.15    | 0.048 | 2.20  |
| PA1299_at      | 63.94   | 95.35   | 0.008 | -1.49 |
| PA1300_at      | 51.96   | 42.38   | 0.238 | 1.23  |
| PA1301_at      | 24.12   | 28.67   | 0.230 | -1.19 |
| PA1302_at      | 14.12   | 17.13   | 0.484 | -1.21 |
| PA1303_at      | 19.32   | 23.50   | 0.151 | -1.22 |
| PA1304_at      | 62.50   | 61.93   | 0.817 | 1.01  |
| PA1305_at      | 256.70  | 243.08  | 0.643 | 1.06  |
| PA1306_at      | 102.72  | 79.40   | 0.048 | 1.29  |
| PA1307_at      | 165.26  | 156.52  | 0.238 | 1.06  |
| PA1308_at      | 108.48  | 83.03   | 0.016 | 1.31  |
| PA1309_at      | 13.58   | 19.13   | 0.111 | -1.41 |
| PA1310_phnW_at | 8.40    | 7.63    | 0.905 | 1.10  |
| PA1311_phnX_at | 12.26   | 9.98    | 0.643 | 1.23  |
| PA1312_at      | 17.40   | 15.08   | 0.643 | 1.15  |
| PA1313_at      | 8.18    | 6.78    | 0.484 | 1.21  |
| PA1314_at      | 16.92   | 27.20   | 0.238 | -1.61 |
| PA1315_at      | 42.22   | 35.70   | 0.238 | 1.18  |
| PA1316_at      | 8.30    | 11.87   | 0.238 | -1.43 |
| PA1317_cyoA_at | 70.46   | 159.85  | 0.048 | -2.27 |
| PA1318_cyoB_at | 34.58   | 81.80   | 0.008 | -2.37 |
| PA1319_cyoC_at | 22.46   | 46.55   | 0.008 | -2.07 |
| PA1320_cyoD_at | 8.98    | 17.05   | 0.087 | -1.90 |
| PA1321_cyoE_at | 18.12   | 33.05   | 0.048 | -1.82 |

**Supplementary Table 1. Probe set signal data for experimental and control samples**

|                 |         |         |       |       |
|-----------------|---------|---------|-------|-------|
| PA1322_at       | 11.32   | 7.50    | 0.190 | 1.51  |
| PA1323_at       | 122.78  | 77.15   | 0.008 | 1.59  |
| PA1324_at       | 97.74   | 87.47   | 0.349 | 1.12  |
| PA1325_at       | 18.88   | 16.75   | 0.484 | 1.13  |
| PA1326_ilvA2_at | 45.64   | 51.70   | 0.484 | -1.13 |
| PA1327_at       | 9.94    | 22.13   | 0.008 | -2.23 |
| PA1328_at       | 9.12    | 8.53    | 0.643 | 1.07  |
| PA1329_at       | 29.22   | 28.42   | 0.643 | 1.03  |
| PA1330_at       | 60.08   | 48.10   | 0.048 | 1.25  |
| PA1331_at       | 65.38   | 51.50   | 0.087 | 1.27  |
| PA1332_at       | 27.84   | 12.77   | 0.024 | 2.18  |
| PA1333_r_at     | 138.26  | 141.00  | 0.817 | -1.02 |
| PA1334_at       | 19.24   | 22.50   | 0.484 | -1.17 |
| PA1335_at       | 87.20   | 93.40   | 0.484 | -1.07 |
| PA1336_at       | 190.04  | 169.82  | 0.087 | 1.12  |
| PA1337_ansB_at  | 993.76  | 809.42  | 0.087 | 1.23  |
| PA1338_ggt_at   | 916.20  | 635.30  | 0.048 | 1.44  |
| PA1339_at       | 1394.56 | 1132.80 | 0.048 | 1.23  |
| PA1340_at       | 993.86  | 687.18  | 0.048 | 1.45  |
| PA1341_at       | 920.80  | 784.73  | 0.151 | 1.17  |
| PA1342_at       | 3897.76 | 2791.82 | 0.008 | 1.40  |
| PA1343_at       | 119.66  | 111.10  | 0.484 | 1.08  |
| PA1344_at       | 46.38   | 48.28   | 0.349 | -1.04 |
| PA1345_at       | 10.48   | 8.88    | 0.817 | 1.18  |
| PA1346_at       | 3.86    | 1.67    | 0.016 | 2.31  |
| PA1347_at       | 9.78    | 10.40   | 1.000 | -1.06 |
| PA1348_at       | 17.36   | 12.40   | 0.190 | 1.40  |
| PA1349_at       | 21.04   | 14.30   | 0.349 | 1.47  |
| PA1350_at       | 16.98   | 15.83   | 0.484 | 1.07  |
| PA1351_at       | 12.18   | 14.10   | 0.349 | -1.16 |
| PA1352_at       | 19.74   | 14.52   | 0.238 | 1.36  |
| PA1353_at       | 17.52   | 16.63   | 0.643 | 1.05  |
| PA1354_at       | 41.82   | 25.70   | 0.024 | 1.63  |
| PA1355_at       | 1.36    | 3.32    | 0.341 | -2.44 |
| PA1356_at       | 30.70   | 19.35   | 0.087 | 1.59  |
| PA1357_at       | 41.02   | 55.83   | 0.087 | -1.36 |
| PA1358_at       | 21.14   | 17.80   | 0.349 | 1.19  |
| PA1359_at       | 23.20   | 26.82   | 0.349 | -1.16 |
| PA1360_at       | 23.22   | 32.18   | 0.151 | -1.39 |
| PA1361_at       | 21.02   | 22.20   | 0.238 | -1.06 |
| PA1362_i_at     | 25.48   | 32.90   | 0.238 | -1.29 |
| PA1363_at       | 48.10   | 71.32   | 0.008 | -1.48 |
| PA1364_at       | 23.04   | 16.10   | 0.048 | 1.43  |
| PA1365_at       | 100.86  | 63.30   | 0.016 | 1.59  |
| PA1366_at       | 23.84   | 33.25   | 0.048 | -1.39 |
| PA1367_at       | 26.00   | 33.85   | 0.087 | -1.30 |
| PA1368_at       | 18.30   | 24.63   | 0.111 | -1.35 |
| PA1369_at       | 13.66   | 11.32   | 1.000 | 1.21  |
| PA1370_at       | 31.18   | 27.15   | 0.484 | 1.15  |
| PA1371_at       | 9.50    | 20.60   | 0.024 | -2.17 |
| PA1372_at       | 22.86   | 48.13   | 0.008 | -2.11 |

## Supplementary Table 1. Probe set signal data for experimental and control samples

|                 |        |        |       |       |
|-----------------|--------|--------|-------|-------|
| PA1373_fabF2_at | 56.18  | 67.40  | 0.087 | -1.20 |
| PA1374_at       | 26.58  | 26.38  | 0.817 | 1.01  |
| PA1375_pdxB_at  | 205.60 | 143.00 | 0.008 | 1.44  |
| PA1376_aceK_at  | 124.70 | 82.78  | 0.008 | 1.51  |
| PA1377_at       | 84.12  | 82.63  | 0.905 | 1.02  |
| PA1378_at       | 27.88  | 15.95  | 0.008 | 1.75  |
| PA1379_at       | 8.98   | 14.52  | 0.024 | -1.62 |
| PA1380_at       | 5.48   | 9.77   | 0.151 | -1.78 |
| PA1381_at       | 4.72   | 6.50   | 0.238 | -1.38 |
| PA1382_at       | 16.40  | 19.95  | 0.087 | -1.22 |
| PA1383_at       | 27.30  | 33.90  | 0.079 | -1.24 |
| PA1384_galE_at  | 5.26   | 2.75   | 0.643 | 1.91  |
| PA1385_at       | 1.24   | 4.47   | 0.087 | -3.60 |
| PA1386_at       | 11.62  | 4.22   | 0.048 | 2.75  |
| PA1387_at       | 15.74  | 15.13  | 0.484 | 1.04  |
| PA1388_at       | 11.52  | 14.40  | 0.341 | -1.25 |
| PA1389_at       | 10.30  | 12.15  | 0.341 | -1.18 |
| PA1390_at       | 13.34  | 8.65   | 0.286 | 1.54  |
| PA1391_at       | 20.80  | 9.93   | 0.024 | 2.09  |
| PA1392_at       | 8.48   | 9.73   | 0.484 | -1.15 |
| PA1393_cysC_at  | 1.34   | 5.75   | 0.008 | -4.29 |
| PA1394_at       | 63.32  | 90.65  | 0.048 | -1.43 |
| PA1395_at       | 62.72  | 81.78  | 0.151 | -1.30 |
| PA1396_at       | 27.76  | 45.95  | 0.008 | -1.66 |
| PA1397_at       | 65.96  | 64.57  | 0.151 | 1.02  |
| PA1398_at       | 48.90  | 58.18  | 0.048 | -1.19 |
| PA1399_at       | 24.72  | 21.42  | 1.000 | 1.15  |
| PA1400_at       | 21.00  | 17.10  | 0.238 | 1.23  |
| PA1401_at       | 30.36  | 42.60  | 0.151 | -1.40 |
| PA1402_at       | 26.84  | 23.43  | 0.484 | 1.15  |
| PA1403_at       | 19.20  | 18.82  | 0.643 | 1.02  |
| PA1404_at       | 77.06  | 49.68  | 0.024 | 1.55  |
| PA1405_at       | 29.02  | 25.97  | 0.349 | 1.12  |
| PA1406_at       | 11.84  | 11.32  | 0.817 | 1.05  |
| PA1407_at       | 59.56  | 68.85  | 0.817 | -1.16 |
| PA1408_at       | 39.58  | 19.08  | 0.008 | 2.07  |
| PA1409_aphA_at  | 97.70  | 54.35  | 0.008 | 1.80  |
| PA1410_at       | 68.56  | 42.43  | 0.008 | 1.62  |
| PA1411_at       | 59.84  | 51.45  | 0.087 | 1.16  |
| PA1412_at       | 7.94   | 10.68  | 0.238 | -1.35 |
| PA1413_at       | 22.52  | 28.88  | 0.151 | -1.28 |
| PA1414_at       | 103.24 | 303.30 | 0.024 | -2.94 |
| PA1415_at       | 21.66  | 20.05  | 0.643 | 1.08  |
| PA1416_at       | 20.28  | 18.07  | 0.484 | 1.12  |
| PA1417_at       | 39.36  | 45.52  | 0.484 | -1.16 |
| PA1418_at       | 38.84  | 41.38  | 0.817 | -1.07 |
| PA1419_at       | 12.32  | 15.17  | 0.730 | -1.23 |
| PA1420_at       | 28.66  | 31.43  | 0.817 | -1.10 |
| PA1421_speB2_at | 41.10  | 61.72  | 0.484 | -1.50 |
| PA1422_at       | 95.44  | 102.70 | 0.643 | -1.08 |
| PA1423_at       | 29.40  | 29.65  | 1.000 | -1.01 |

**Supplementary Table 1. Probe set signal data for experimental and control samples**

|                |        |        |       |       |
|----------------|--------|--------|-------|-------|
| PA1424_at      | 21.06  | 15.00  | 0.349 | 1.40  |
| PA1425_at      | 20.48  | 19.05  | 0.643 | 1.08  |
| PA1426_at      | 12.90  | 8.93   | 0.484 | 1.44  |
| PA1427_at      | 14.72  | 18.60  | 0.484 | -1.26 |
| PA1428_at      | 8.84   | 5.48   | 0.190 | 1.61  |
| PA1429_at      | 40.06  | 43.53  | 0.151 | -1.09 |
| PA1430_lasR_at | 135.98 | 123.55 | 0.817 | 1.10  |
| PA1431_rsaL_at | 327.98 | 414.42 | 0.484 | -1.26 |
| PA1432_lasI_at | 217.34 | 439.25 | 0.008 | -2.02 |
| PA1433_at      | 25.02  | 29.42  | 0.349 | -1.18 |
| PA1434_at      | 34.82  | 30.33  | 0.238 | 1.15  |
| PA1435_at      | 28.56  | 18.35  | 0.151 | 1.56  |
| PA1436_at      | 21.14  | 17.20  | 0.643 | 1.23  |
| PA1437_at      | 23.86  | 25.77  | 0.643 | -1.08 |
| PA1438_at      | 34.60  | 24.77  | 0.048 | 1.40  |
| PA1439_at      | 60.22  | 56.13  | 0.817 | 1.07  |
| PA1440_at      | 709.08 | 656.28 | 0.484 | 1.08  |
| PA1441_at      | 377.86 | 350.95 | 0.048 | 1.08  |
| PA1442_at      | 278.80 | 324.83 | 0.024 | -1.17 |
| PA1443_fliM_at | 241.38 | 269.63 | 0.151 | -1.12 |
| PA1444_fliN_at | 80.24  | 88.15  | 0.349 | -1.10 |
| PA1445_fliO_at | 59.62  | 79.63  | 0.048 | -1.34 |
| PA1446_fliP_at | 81.90  | 75.03  | 0.238 | 1.09  |
| PA1447_fliQ_at | 51.08  | 66.88  | 0.024 | -1.31 |
| PA1448_fliR_at | 24.92  | 31.65  | 0.151 | -1.27 |
| PA1449_flhB_at | 17.54  | 17.33  | 0.817 | 1.01  |
| PA1450_at      | 28.60  | 23.10  | 0.151 | 1.24  |
| PA1451_at      | 39.18  | 43.28  | 0.151 | -1.10 |
| PA1452_flhA_at | 90.08  | 76.57  | 0.349 | 1.18  |
| PA1453_flhF_at | 332.14 | 212.05 | 0.008 | 1.57  |
| PA1454_at      | 654.46 | 471.55 | 0.008 | 1.39  |
| PA1455_fliA_at | 390.62 | 306.15 | 0.008 | 1.28  |
| PA1456_cheY_at | 347.40 | 420.52 | 0.024 | -1.21 |
| PA1457_cheZ_at | 334.14 | 421.58 | 0.008 | -1.26 |
| PA1458_at      | 321.66 | 335.65 | 0.238 | -1.04 |
| PA1459_at      | 414.98 | 356.83 | 0.238 | 1.16  |
| PA1460_at      | 117.82 | 100.28 | 0.087 | 1.17  |
| PA1461_at      | 78.54  | 58.10  | 0.024 | 1.35  |
| PA1462_at      | 260.56 | 218.63 | 0.024 | 1.19  |
| PA1463_at      | 202.58 | 144.20 | 0.008 | 1.40  |
| PA1464_at      | 599.74 | 662.70 | 0.087 | -1.10 |
| PA1465_at      | 91.98  | 99.05  | 0.143 | -1.08 |
| PA1466_at      | 277.02 | 17.27  | 0.008 | 16.04 |
| PA1467_at      | 59.32  | 58.50  | 0.817 | 1.01  |
| PA1468_at      | 19.22  | 21.83  | 0.238 | -1.14 |
| PA1469_at      | 34.94  | 18.17  | 0.008 | 1.92  |
| PA1470_at      | 15.20  | 17.30  | 0.484 | -1.14 |
| PA1471_at      | 56.38  | 44.90  | 0.151 | 1.26  |
| PA1472_at      | 57.02  | 49.50  | 0.349 | 1.15  |
| PA1473_at      | 44.98  | 48.95  | 0.484 | -1.09 |
| PA1474_at      | 132.04 | 123.97 | 0.484 | 1.07  |

### Supplementary Table 1. Probe set signal data for experimental and control samples

|                 |        |        |       |       |
|-----------------|--------|--------|-------|-------|
| PA1475_ccmA_at  | 143.90 | 133.43 | 0.238 | 1.08  |
| PA1476_ccmB_at  | 78.68  | 64.30  | 0.048 | 1.22  |
| PA1477_ccmC_at  | 49.68  | 69.45  | 0.008 | -1.40 |
| PA1478_at       | 183.74 | 205.10 | 0.484 | -1.12 |
| PA1479_ccmE_at  | 314.64 | 379.00 | 0.048 | -1.20 |
| PA1480_ccmF_at  | 131.74 | 167.00 | 0.008 | -1.27 |
| PA1481_ccmG_at  | 120.08 | 120.50 | 0.643 | -1.00 |
| PA1482_ccmH_at  | 247.24 | 319.75 | 0.024 | -1.29 |
| PA1483_cycH_at  | 140.58 | 150.48 | 0.238 | -1.07 |
| PA1484_at       | 32.90  | 24.52  | 0.008 | 1.34  |
| PA1485_at       | 15.10  | 14.50  | 0.817 | 1.04  |
| PA1486_at       | 10.14  | 13.95  | 0.484 | -1.38 |
| PA1487_at       | 46.14  | 53.15  | 0.484 | -1.15 |
| PA1488_at       | 48.86  | 42.28  | 0.238 | 1.16  |
| PA1489_at       | 35.92  | 32.72  | 0.484 | 1.10  |
| PA1490_at       | 38.84  | 41.78  | 0.817 | -1.08 |
| PA1491_at       | 10.36  | 9.52   | 0.817 | 1.09  |
| PA1492_at       | 9.26   | 22.25  | 0.087 | -2.40 |
| PA1493_cysP_at  | 836.38 | 765.10 | 0.087 | 1.09  |
| PA1494_at       | 300.32 | 254.65 | 0.151 | 1.18  |
| PA1495_at       | 60.86  | 53.35  | 0.484 | 1.14  |
| PA1496_at       | 20.76  | 20.97  | 0.643 | -1.01 |
| PA1497_at       | 12.80  | 11.43  | 0.643 | 1.12  |
| PA1498_pykF_at  | 12.10  | 10.10  | 0.484 | 1.20  |
| PA1499_at       | 23.50  | 30.72  | 0.048 | -1.31 |
| PA1500_at       | 20.10  | 26.35  | 0.048 | -1.31 |
| PA1501_at       | 11.00  | 16.55  | 0.087 | -1.50 |
| PA1502_gcl_at   | 12.22  | 27.23  | 0.024 | -2.23 |
| PA1503_at       | 2.32   | 10.68  | 0.024 | -4.60 |
| PA1504_at       | 241.10 | 300.22 | 0.008 | -1.25 |
| PA1505_moaA2_at | 137.26 | 116.13 | 0.238 | 1.18  |
| PA1506_at       | 30.28  | 29.55  | 0.817 | 1.02  |
| PA1507_at       | 43.48  | 22.63  | 0.008 | 1.92  |
| PA1508_at       | 23.78  | 23.00  | 0.817 | 1.03  |
| PA1509_at       | 25.24  | 28.35  | 0.349 | -1.12 |
| PA1510_at       | 13.22  | 13.02  | 0.817 | 1.02  |
| PA1511_at       | 39.26  | 40.67  | 0.817 | -1.04 |
| PA1513_at       | 68.54  | 56.28  | 0.151 | 1.22  |
| PA1514_at       | 30.00  | 49.75  | 0.008 | -1.66 |
| PA1515_alc_at   | 44.80  | 56.50  | 0.238 | -1.26 |
| PA1516_at       | 38.16  | 36.27  | 0.817 | 1.05  |
| PA1517_at       | 144.72 | 130.80 | 0.643 | 1.11  |
| PA1518_at       | 32.78  | 44.80  | 0.048 | -1.37 |
| PA1519_at       | 11.96  | 4.75   | 0.238 | 2.52  |
| PA1520_at       | 183.06 | 227.98 | 0.008 | -1.25 |
| PA1521_at       | 53.00  | 63.55  | 0.238 | -1.20 |
| PA1522_at       | 61.78  | 56.95  | 0.817 | 1.08  |
| PA1523_xdhB_at  | 20.26  | 22.73  | 0.817 | -1.12 |
| PA1524_xdhA_at  | 39.06  | 32.53  | 0.349 | 1.20  |
| PA1525_at       | 20.04  | 14.13  | 0.143 | 1.42  |
| PA1526_at       | 118.86 | 129.73 | 0.349 | -1.09 |

**Supplementary Table 1. Probe set signal data for experimental and control samples**

|                |         |         |       |       |
|----------------|---------|---------|-------|-------|
| PA1527_at      | 246.68  | 209.70  | 0.024 | 1.18  |
| PA1528_zipA_at | 633.86  | 662.55  | 0.484 | -1.05 |
| PA1529_lig_at  | 104.38  | 129.23  | 0.008 | -1.24 |
| PA1530_at      | 54.08   | 94.65   | 0.008 | -1.75 |
| PA1531_at      | 3.76    | 8.35    | 0.143 | -2.22 |
| PA1532_dnaX_at | 558.36  | 408.75  | 0.008 | 1.37  |
| PA1533_at      | 624.88  | 666.00  | 0.151 | -1.07 |
| PA1534_recR_at | 85.54   | 68.20   | 0.087 | 1.25  |
| PA1535_at      | 47.00   | 37.25   | 0.048 | 1.26  |
| PA1536_at      | 26.56   | 19.05   | 0.048 | 1.39  |
| PA1537_at      | 21.74   | 8.63    | 0.024 | 2.52  |
| PA1538_at      | 25.66   | 22.78   | 0.817 | 1.13  |
| PA1539_at      | 34.38   | 42.20   | 0.151 | -1.23 |
| PA1540_at      | 11.38   | 8.10    | 0.238 | 1.40  |
| PA1541_at      | 5.70    | 1.88    | 0.111 | 3.03  |
| PA1542_at      | 10.76   | 15.65   | 0.238 | -1.45 |
| PA1543_apr_at  | 270.36  | 290.63  | 0.151 | -1.07 |
| PA1544_anr_at  | 778.80  | 865.85  | 0.413 | -1.11 |
| PA1545_at      | 100.90  | 114.25  | 0.484 | -1.13 |
| PA1546_hemN_at | 131.58  | 181.18  | 0.151 | -1.38 |
| PA1547_at      | 44.12   | 33.53   | 0.087 | 1.32  |
| PA1548_at      | 40.08   | 31.17   | 0.413 | 1.29  |
| PA1549_at      | 45.72   | 53.15   | 0.484 | -1.16 |
| PA1550_at      | 135.58  | 194.98  | 0.048 | -1.44 |
| PA1551_at      | 112.74  | 127.80  | 0.349 | -1.13 |
| PA1552_at      | 729.48  | 1023.95 | 0.008 | -1.40 |
| PA1553_at      | 1532.64 | 1918.82 | 0.087 | -1.25 |
| PA1554_at      | 2379.04 | 2795.95 | 0.151 | -1.18 |
| PA1555_at      | 329.42  | 394.48  | 0.484 | -1.20 |
| PA1556_at      | 332.44  | 547.17  | 0.238 | -1.65 |
| PA1557_at      | 288.40  | 486.55  | 0.238 | -1.69 |
| PA1558_at      | 49.36   | 38.40   | 0.048 | 1.29  |
| PA1559_at      | 225.68  | 159.43  | 0.151 | 1.42  |
| PA1560_at      | 79.86   | 70.45   | 0.349 | 1.13  |
| PA1561_aer_at  | 214.64  | 338.77  | 0.024 | -1.58 |
| PA1562_acnA_at | 40.80   | 33.47   | 0.063 | 1.22  |
| PA1563_at      | 51.38   | 61.65   | 0.087 | -1.20 |
| PA1564_at      | 91.22   | 141.60  | 0.008 | -1.55 |
| PA1565_at      | 35.06   | 39.60   | 0.730 | -1.13 |
| PA1566_at      | 35.98   | 42.75   | 0.484 | -1.19 |
| PA1567_at      | 10.80   | 9.33    | 0.643 | 1.16  |
| PA1568_at      | 5.18    | 12.32   | 0.238 | -2.38 |
| PA1569_at      | 9.88    | 2.85    | 0.024 | 3.47  |
| PA1570_at      | 31.62   | 30.95   | 0.643 | 1.02  |
| PA1571_at      | 72.80   | 69.65   | 0.468 | 1.05  |
| PA1572_at      | 75.96   | 62.30   | 0.151 | 1.22  |
| PA1573_at      | 62.42   | 48.55   | 0.024 | 1.29  |
| PA1574_at      | 112.52  | 268.60  | 0.008 | -2.39 |
| PA1575_at      | 16.78   | 19.72   | 0.413 | -1.18 |
| PA1576_at      | 47.02   | 31.28   | 0.008 | 1.50  |
| PA1577_at      | 32.02   | 45.42   | 0.024 | -1.42 |

**Supplementary Table 1. Probe set signal data for experimental and control samples**

|                |         |         |       |       |
|----------------|---------|---------|-------|-------|
| PA1578_at      | 14.76   | 13.22   | 0.643 | 1.12  |
| PA1579_at      | 429.48  | 409.17  | 0.817 | 1.05  |
| PA1580_gltA_at | 2277.70 | 2253.77 | 0.817 | 1.01  |
| PA1581_sdhC_at | 1863.34 | 2079.05 | 0.087 | -1.12 |
| PA1582_sdhD_at | 2547.78 | 2420.17 | 0.643 | 1.05  |
| PA1583_sdhA_at | 1993.26 | 2014.45 | 0.151 | -1.01 |
| PA1584_sdhB_at | 1555.30 | 1819.38 | 0.151 | -1.17 |
| PA1585_sucA_at | 1174.80 | 1086.13 | 0.643 | 1.08  |
| PA1586_sucB_at | 2924.20 | 2385.45 | 0.048 | 1.23  |
| PA1587_lpdG_at | 1084.46 | 1171.65 | 0.484 | -1.08 |
| PA1588_sucC_at | 4972.62 | 4064.10 | 0.008 | 1.22  |
| PA1589_sucD_at | 3158.34 | 3620.13 | 0.087 | -1.15 |
| PA1590_braB_at | 84.52   | 90.23   | 0.817 | -1.07 |
| PA1591_at      | 33.72   | 48.63   | 0.008 | -1.44 |
| PA1592_i_at    | 716.62  | 1529.30 | 0.008 | -2.13 |
| PA1593_at      | 98.94   | 110.78  | 0.238 | -1.12 |
| PA1594_at      | 47.06   | 56.17   | 0.087 | -1.19 |
| PA1595_at      | 33.42   | 32.60   | 1.000 | 1.03  |
| PA1596_htpG_at | 880.12  | 1252.07 | 0.008 | -1.42 |
| PA1597_at      | 62.38   | 52.10   | 0.238 | 1.20  |
| PA1598_at      | 4.18    | 6.13    | 0.817 | -1.47 |
| PA1599_at      | 23.62   | 17.08   | 0.024 | 1.38  |
| PA1600_at      | 45.94   | 43.08   | 0.817 | 1.07  |
| PA1601_at      | 38.06   | 38.58   | 1.000 | -1.01 |
| PA1602_at      | 49.34   | 54.30   | 0.238 | -1.10 |
| PA1603_at      | 42.44   | 35.65   | 0.349 | 1.19  |
| PA1604_at      | 55.14   | 48.25   | 0.492 | 1.14  |
| PA1605_at      | 25.94   | 20.80   | 0.349 | 1.25  |
| PA1606_at      | 17.88   | 27.77   | 0.024 | -1.55 |
| PA1607_at      | 44.36   | 43.60   | 0.643 | 1.02  |
| PA1608_at      | 82.16   | 76.27   | 0.817 | 1.08  |
| PA1609_fabB_at | 485.60  | 752.25  | 0.008 | -1.55 |
| PA1610_fabA_at | 864.70  | 1337.43 | 0.024 | -1.55 |
| PA1611_at      | 52.86   | 63.88   | 0.008 | -1.21 |
| PA1612_at      | 50.10   | 56.92   | 0.151 | -1.14 |
| PA1613_at      | 84.84   | 64.30   | 0.087 | 1.32  |
| PA1614_gpsA_at | 310.56  | 308.63  | 1.000 | 1.01  |
| PA1615_at      | 124.90  | 142.70  | 0.151 | -1.14 |
| PA1616_at      | 147.50  | 174.43  | 0.349 | -1.18 |
| PA1617_at      | 39.36   | 21.63   | 0.008 | 1.82  |
| PA1618_at      | 165.26  | 96.97   | 0.008 | 1.70  |
| PA1619_at      | 64.00   | 59.55   | 0.643 | 1.07  |
| PA1620_at      | 18.16   | 23.63   | 0.556 | -1.30 |
| PA1621_at      | 129.50  | 92.88   | 0.008 | 1.39  |
| PA1622_at      | 49.26   | 49.60   | 1.000 | -1.01 |
| PA1623_at      | 97.22   | 89.73   | 0.484 | 1.08  |
| PA1624_at      | 89.32   | 64.40   | 0.151 | 1.39  |
| PA1625_at      | 17.98   | 14.05   | 0.238 | 1.28  |
| PA1626_at      | 31.86   | 41.38   | 0.079 | -1.30 |
| PA1627_at      | 52.70   | 54.28   | 0.817 | -1.03 |
| PA1628_at      | 12.96   | 16.10   | 1.000 | -1.24 |



### Supplementary Table 1. Probe set signal data for experimental and control samples

|                 |        |        |       |       |
|-----------------|--------|--------|-------|-------|
| PA1629_at       | 29.42  | 29.25  | 0.730 | 1.01  |
| PA1630_at       | 43.44  | 45.72  | 0.643 | -1.05 |
| PA1631_at       | 9.70   | 13.05  | 0.484 | -1.35 |
| PA1632_kdpF_at  | 11.28  | 32.02  | 0.008 | -2.84 |
| PA1633_kdpA_at  | 19.44  | 45.63  | 0.008 | -2.35 |
| PA1634_kdpB_at  | 25.72  | 58.48  | 0.008 | -2.27 |
| PA1635_kdpC_at  | 18.28  | 34.53  | 0.024 | -1.89 |
| PA1636_kdpD_at  | 21.22  | 27.58  | 0.048 | -1.30 |
| PA1637_kdpE_at  | 14.54  | 9.73   | 0.151 | 1.49  |
| PA1638_at       | 50.00  | 68.45  | 0.008 | -1.37 |
| PA1639_at       | 74.44  | 93.10  | 0.151 | -1.25 |
| PA1640_at       | 137.70 | 86.28  | 0.008 | 1.60  |
| PA1641_at       | 60.50  | 54.83  | 0.349 | 1.10  |
| PA1642_selD_at  | 148.64 | 146.00 | 0.817 | 1.02  |
| PA1643_at       | 40.52  | 65.82  | 0.008 | -1.62 |
| PA1644_at       | 92.80  | 83.05  | 0.151 | 1.12  |
| PA1645_at       | 58.22  | 53.53  | 0.484 | 1.09  |
| PA1646_at       | 19.10  | 18.50  | 0.643 | 1.03  |
| PA1647_at       | 28.22  | 26.03  | 0.643 | 1.08  |
| PA1648_at       | 11.66  | 11.27  | 0.643 | 1.03  |
| PA1649_at       | 18.34  | 18.60  | 0.730 | -1.01 |
| PA1650_at       | 17.44  | 9.50   | 0.151 | 1.84  |
| PA1651_at       | 56.96  | 46.10  | 0.008 | 1.24  |
| PA1652_at       | 42.48  | 26.72  | 0.008 | 1.59  |
| PA1653_at       | 41.30  | 36.42  | 0.643 | 1.13  |
| PA1654_at       | 268.14 | 166.45 | 0.008 | 1.61  |
| PA1655_at       | 69.34  | 58.27  | 0.238 | 1.19  |
| PA1656_at       | 121.48 | 103.63 | 0.238 | 1.17  |
| PA1657_at       | 166.72 | 255.63 | 0.087 | -1.53 |
| PA1658_at       | 124.30 | 176.70 | 0.048 | -1.42 |
| PA1659_at       | 74.16  | 123.05 | 0.024 | -1.66 |
| PA1660_at       | 46.70  | 54.25  | 0.349 | -1.16 |
| PA1661_at       | 48.82  | 58.88  | 0.087 | -1.21 |
| PA1662_at       | 49.62  | 56.53  | 0.349 | -1.14 |
| PA1663_at       | 85.52  | 90.77  | 0.817 | -1.06 |
| PA1664_at       | 122.10 | 141.73 | 0.643 | -1.16 |
| PA1665_at       | 49.80  | 83.43  | 0.008 | -1.68 |
| PA1666_at       | 43.34  | 73.07  | 0.008 | -1.69 |
| PA1667_at       | 62.22  | 106.15 | 0.048 | -1.71 |
| PA1668_at       | 41.20  | 61.35  | 0.087 | -1.49 |
| PA1669_at       | 43.72  | 63.35  | 0.238 | -1.45 |
| PA1670_stp1_at  | 42.24  | 42.70  | 1.000 | -1.01 |
| PA1671_stk1_at  | 21.18  | 21.95  | 1.000 | -1.04 |
| PA1672_at       | 18.04  | 13.82  | 0.349 | 1.31  |
| PA1673_at       | 93.12  | 181.40 | 0.048 | -1.95 |
| PA1674_folE2_at | 145.92 | 280.55 | 0.008 | -1.92 |
| PA1675_at       | 140.22 | 150.70 | 0.349 | -1.07 |
| PA1676_at       | 74.46  | 77.43  | 0.643 | -1.04 |
| PA1677_at       | 420.20 | 451.35 | 0.238 | -1.07 |
| PA1678_at       | 117.50 | 146.98 | 0.024 | -1.25 |
| PA1679_at       | 93.20  | 68.00  | 0.008 | 1.37  |

## Supplementary Table 1. Probe set signal data for experimental and control samples

|                  |        |        |       |       |
|------------------|--------|--------|-------|-------|
| PA1680_at        | 38.56  | 25.75  | 0.008 | 1.50  |
| PA1681_aroC_at   | 190.54 | 236.25 | 0.024 | -1.24 |
| PA1682_at        | 36.00  | 33.60  | 0.484 | 1.07  |
| PA1683_at        | 117.82 | 107.02 | 0.143 | 1.10  |
| PA1684_at        | 199.40 | 219.60 | 0.238 | -1.10 |
| PA1685_masA_at   | 94.46  | 99.23  | 0.643 | -1.05 |
| PA1686_alkA_at   | 88.50  | 68.48  | 0.048 | 1.29  |
| PA1687_speE_at   | 77.78  | 204.80 | 0.008 | -2.63 |
| PA1688_at        | 165.30 | 145.35 | 0.151 | 1.14  |
| PA1689_at        | 132.68 | 155.50 | 0.087 | -1.17 |
| PA1690_pscU_at   | 17.72  | 12.17  | 0.048 | 1.46  |
| PA1691_pscT_at   | 31.72  | 21.73  | 0.087 | 1.46  |
| PA1692_at        | 72.18  | 59.00  | 0.151 | 1.22  |
| PA1693_pscR_at   | 33.58  | 32.57  | 0.556 | 1.03  |
| PA1694_pscQ_at   | 102.66 | 89.55  | 0.238 | 1.15  |
| PA1695_pscP_at   | 44.04  | 32.72  | 0.087 | 1.35  |
| PA1696_pscO_at   | 54.16  | 36.15  | 0.087 | 1.50  |
| PA1697_at        | 96.90  | 63.60  | 0.008 | 1.52  |
| PA1698_popN_at   | 42.16  | 38.08  | 0.484 | 1.11  |
| PA1699_at        | 34.50  | 32.80  | 0.643 | 1.05  |
| PA1700_at        | 62.84  | 62.10  | 0.556 | 1.01  |
| PA1701_at        | 92.76  | 73.72  | 0.048 | 1.26  |
| PA1702_i_at      | 11.00  | 17.60  | 0.238 | -1.60 |
| PA1703_pcrD_at   | 48.56  | 41.90  | 0.643 | 1.16  |
| PA1704_pcrR_at   | 17.92  | 18.77  | 1.000 | -1.05 |
| PA1705_pcrG_i_at | 42.42  | 34.78  | 0.238 | 1.22  |
| PA1706_pcrV_at   | 48.54  | 47.83  | 0.817 | 1.01  |
| PA1707_pcrH_at   | 52.98  | 64.47  | 0.087 | -1.22 |
| PA1708_popB_at   | 128.20 | 123.07 | 0.151 | 1.04  |
| PA1709_popD_at   | 52.88  | 67.90  | 0.024 | -1.28 |
| PA1710_exsC_at   | 178.78 | 164.55 | 0.643 | 1.09  |
| PA1711_at        | 257.48 | 162.38 | 0.008 | 1.59  |
| PA1712_exsB_at   | 56.04  | 61.80  | 0.484 | -1.10 |
| PA1713_exsA_at   | 75.58  | 73.17  | 0.484 | 1.03  |
| PA1714_at        | 155.08 | 119.97 | 0.087 | 1.29  |
| PA1715_pscB_at   | 27.06  | 20.98  | 0.151 | 1.29  |
| PA1716_pscC_at   | 91.58  | 70.20  | 0.484 | 1.30  |
| PA1717_pscD_at   | 46.26  | 37.42  | 0.349 | 1.24  |
| PA1718_pscE_at   | 75.72  | 128.42 | 0.008 | -1.70 |
| PA1719_pscF_at   | 57.94  | 91.28  | 0.048 | -1.58 |
| PA1720_pscG_at   | 44.32  | 53.10  | 0.087 | -1.20 |
| PA1721_pscH_at   | 36.18  | 39.67  | 0.643 | -1.10 |
| PA1722_pscI_at   | 92.58  | 91.38  | 0.643 | 1.01  |
| PA1723_pscJ_at   | 42.26  | 47.07  | 0.349 | -1.11 |
| PA1724_pscK_at   | 38.60  | 37.92  | 1.000 | 1.02  |
| PA1725_pscL_at   | 16.46  | 21.38  | 0.087 | -1.30 |
| PA1726_bglX_at   | 341.14 | 257.55 | 0.024 | 1.32  |
| PA1727_at        | 89.06  | 82.40  | 0.151 | 1.08  |
| PA1728_at        | 31.84  | 29.13  | 0.484 | 1.09  |
| PA1729_at        | 46.94  | 39.33  | 0.151 | 1.19  |
| PA1730_at        | 18.88  | 24.27  | 0.151 | -1.29 |

## Supplementary Table 1. Probe set signal data for experimental and control samples

|                |         |         |       |       |
|----------------|---------|---------|-------|-------|
| PA1731_at      | 26.92   | 24.13   | 0.817 | 1.12  |
| PA1732_at      | 39.00   | 31.40   | 0.349 | 1.24  |
| PA1733_at      | 33.22   | 37.42   | 0.905 | -1.13 |
| PA1734_at      | 47.84   | 32.80   | 0.008 | 1.46  |
| PA1735_at      | 17.50   | 20.40   | 0.341 | -1.17 |
| PA1736_at      | 20.26   | 21.05   | 0.643 | -1.04 |
| PA1737_at      | 44.46   | 29.05   | 0.008 | 1.53  |
| PA1738_at      | 37.74   | 26.15   | 0.151 | 1.44  |
| PA1739_at      | 11.64   | 15.20   | 0.349 | -1.31 |
| PA1740_at      | 12.44   | 4.23    | 0.024 | 2.94  |
| PA1741_at      | 48.54   | 87.13   | 0.008 | -1.80 |
| PA1742_at      | 169.08  | 132.98  | 0.008 | 1.27  |
| PA1743_at      | 3.66    | 9.83    | 0.024 | -2.69 |
| PA1744_at      | 14.04   | 10.02   | 0.238 | 1.40  |
| PA1745_at      | 14.24   | 19.00   | 0.484 | -1.33 |
| PA1746_at      | 23.72   | 38.60   | 0.048 | -1.63 |
| PA1747_at      | 15.28   | 22.05   | 0.238 | -1.44 |
| PA1748_at      | 128.70  | 138.20  | 0.643 | -1.07 |
| PA1749_at      | 75.74   | 85.40   | 0.151 | -1.13 |
| PA1750_at      | 455.28  | 445.85  | 0.817 | 1.02  |
| PA1751_at      | 50.72   | 38.23   | 0.024 | 1.33  |
| PA1752_at      | 147.50  | 109.65  | 0.008 | 1.35  |
| PA1753_at      | 52.62   | 62.82   | 0.151 | -1.19 |
| PA1754_cysB_at | 348.70  | 407.03  | 0.008 | -1.17 |
| PA1755_at      | 32.72   | 39.10   | 0.087 | -1.19 |
| PA1756_cysH_at | 83.30   | 126.63  | 0.048 | -1.52 |
| PA1757_thrH_at | 304.10  | 359.55  | 0.087 | -1.18 |
| PA1758_pabB_at | 57.72   | 61.42   | 0.484 | -1.06 |
| PA1759_at      | 181.54  | 77.60   | 0.008 | 2.34  |
| PA1760_at      | 143.22  | 51.27   | 0.008 | 2.79  |
| PA1761_at      | 173.78  | 120.92  | 0.008 | 1.44  |
| PA1762_at      | 34.18   | 14.22   | 0.008 | 2.40  |
| PA1763_at      | 32.80   | 20.00   | 0.008 | 1.64  |
| PA1764_at      | 7.02    | 7.53    | 1.000 | -1.07 |
| PA1765_at      | 13.72   | 13.70   | 0.905 | 1.00  |
| PA1766_at      | 200.62  | 267.23  | 0.024 | -1.33 |
| PA1767_at      | 274.42  | 401.25  | 0.008 | -1.46 |
| PA1768_at      | 576.64  | 667.10  | 0.087 | -1.16 |
| PA1769_at      | 91.64   | 151.32  | 0.008 | -1.65 |
| PA1770_ppsA_at | 867.68  | 937.72  | 0.238 | -1.08 |
| PA1771_at      | 57.68   | 69.65   | 0.238 | -1.21 |
| PA1772_at      | 185.58  | 209.63  | 0.151 | -1.13 |
| PA1773_at      | 74.10   | 84.52   | 0.151 | -1.14 |
| PA1774_at      | 93.90   | 108.82  | 0.048 | -1.16 |
| PA1775_at      | 153.42  | 161.18  | 0.349 | -1.05 |
| PA1776_at      | 358.12  | 722.53  | 0.008 | -2.02 |
| PA1777_oprF_at | 1752.26 | 1914.50 | 0.643 | -1.09 |
| PA1778_cobA_at | 1.32    | 5.25    | 0.008 | -3.98 |
| PA1779_at      | 4.74    | 4.22    | 0.484 | 1.12  |
| PA1780_nirD_at | 6.14    | 8.98    | 0.349 | -1.46 |
| PA1781_nirB_at | 2.16    | 3.13    | 0.222 | -1.45 |

### Supplementary Table 1. Probe set signal data for experimental and control samples

|                |         |         |       |       |
|----------------|---------|---------|-------|-------|
| PA1782_at      | 23.62   | 16.90   | 0.048 | 1.40  |
| PA1783_nasA_at | 8.50    | 4.55    | 0.151 | 1.87  |
| PA1784_at      | 34.26   | 29.55   | 0.484 | 1.16  |
| PA1785_at      | 4.10    | 7.28    | 0.151 | -1.78 |
| PA1786_at      | 23.60   | 23.90   | 0.817 | -1.01 |
| PA1787_acnB_at | 1908.38 | 1854.45 | 1.000 | 1.03  |
| PA1788_at      | 44.92   | 59.88   | 0.087 | -1.33 |
| PA1789_at      | 101.32  | 102.40  | 1.000 | -1.01 |
| PA1790_at      | 26.20   | 75.47   | 0.008 | -2.88 |
| PA1791_at      | 337.36  | 361.67  | 0.151 | -1.07 |
| PA1792_at      | 538.00  | 363.02  | 0.008 | 1.48  |
| PA1793_ppiB_at | 822.76  | 1207.43 | 0.048 | -1.47 |
| PA1794_glnS_at | 604.10  | 632.57  | 0.484 | -1.05 |
| PA1795_cysS_at | 468.84  | 473.77  | 0.643 | -1.01 |
| PA1796_folD_at | 373.84  | 463.25  | 0.024 | -1.24 |
| PA1797_at      | 27.78   | 16.15   | 0.024 | 1.72  |
| PA1798_at      | 87.16   | 90.57   | 0.817 | -1.04 |
| PA1799_at      | 285.10  | 300.05  | 0.643 | -1.05 |
| PA1800_tig_at  | 1822.92 | 1921.43 | 0.484 | -1.05 |
| PA1801_clpP_at | 1149.28 | 1265.93 | 0.087 | -1.10 |
| PA1802_clpX_at | 712.98  | 961.65  | 0.008 | -1.35 |
| PA1803_lon_at  | 359.38  | 515.08  | 0.024 | -1.43 |
| PA1804_hupB_at | 1187.16 | 1279.38 | 0.643 | -1.08 |
| PA1805_ppiD_at | 563.94  | 657.17  | 0.008 | -1.17 |
| PA1806_fabI_at | 290.50  | 152.85  | 0.008 | 1.90  |
| PA1807_at      | 103.44  | 111.03  | 0.817 | -1.07 |
| PA1808_at      | 126.84  | 87.72   | 0.008 | 1.45  |
| PA1809_at      | 88.54   | 79.65   | 0.349 | 1.11  |
| PA1810_at      | 40.92   | 37.90   | 0.817 | 1.08  |
| PA1811_at      | 65.68   | 69.93   | 0.484 | -1.06 |
| PA1812_mltD_at | 755.06  | 731.03  | 0.643 | 1.03  |
| PA1813_at      | 177.08  | 152.30  | 0.349 | 1.16  |
| PA1814_at      | 155.08  | 121.68  | 0.024 | 1.27  |
| PA1815_rnhA_at | 190.22  | 226.25  | 0.024 | -1.19 |
| PA1816_dnaQ_at | 149.64  | 149.77  | 0.643 | -1.00 |
| PA1817_at      | 7.60    | 10.18   | 0.151 | -1.34 |
| PA1818_at      | 942.34  | 516.90  | 0.008 | 1.82  |
| PA1819_at      | 69.20   | 45.47   | 0.008 | 1.52  |
| PA1820_nhaB_at | 38.76   | 26.90   | 0.008 | 1.44  |
| PA1821_at      | 278.02  | 291.67  | 0.817 | -1.05 |
| PA1822_at      | 137.12  | 119.38  | 0.484 | 1.15  |
| PA1823_at      | 103.48  | 117.68  | 0.151 | -1.14 |
| PA1824_at      | 26.66   | 30.10   | 0.484 | -1.13 |
| PA1825_at      | 30.84   | 27.80   | 0.817 | 1.11  |
| PA1826_at      | 20.42   | 12.35   | 0.087 | 1.65  |
| PA1827_at      | 18.32   | 20.38   | 0.817 | -1.11 |
| PA1828_at      | 77.32   | 65.55   | 0.151 | 1.18  |
| PA1829_at      | 140.70  | 101.10  | 0.008 | 1.39  |
| PA1830_at      | 146.84  | 218.90  | 0.024 | -1.49 |
| PA1831_at      | 46.94   | 51.65   | 0.817 | -1.10 |
| PA1832_at      | 64.44   | 106.63  | 0.008 | -1.65 |

### Supplementary Table 1. Probe set signal data for experimental and control samples

|                |        |        |       |       |
|----------------|--------|--------|-------|-------|
| PA1833_at      | 93.14  | 87.93  | 0.349 | 1.06  |
| PA1834_at      | 20.20  | 22.48  | 0.349 | -1.11 |
| PA1835_at      | 61.06  | 64.40  | 0.817 | -1.05 |
| PA1836_at      | 11.10  | 23.62  | 0.008 | -2.13 |
| PA1837_at      | 188.30 | 386.17 | 0.008 | -2.05 |
| PA1838_cysl_at | 328.54 | 582.15 | 0.008 | -1.77 |
| PA1839_at      | 33.92  | 56.65  | 0.008 | -1.67 |
| PA1840_at      | 98.96  | 132.03 | 0.048 | -1.33 |
| PA1841_at      | 39.66  | 49.63  | 0.087 | -1.25 |
| PA1842_at      | 41.22  | 50.85  | 0.151 | -1.23 |
| PA1843_metH_at | 80.12  | 75.55  | 0.484 | 1.06  |
| PA1844_at      | 25.56  | 27.63  | 0.484 | -1.08 |
| PA1845_at      | 36.78  | 83.60  | 0.008 | -2.27 |
| PA1846_cti_at  | 74.50  | 76.25  | 0.635 | -1.02 |
| PA1847_at      | 232.44 | 290.17 | 0.087 | -1.25 |
| PA1848_at      | 9.38   | 8.07   | 0.643 | 1.16  |
| PA1849_at      | 2.24   | 6.60   | 0.008 | -2.95 |
| PA1850_at      | 37.98  | 24.40  | 0.024 | 1.56  |
| PA1851_at      | 12.54  | 11.80  | 0.635 | 1.06  |
| PA1852_at      | 117.92 | 239.65 | 0.048 | -2.03 |
| PA1853_at      | 78.32  | 75.40  | 0.817 | 1.04  |
| PA1854_at      | 3.40   | 17.52  | 0.008 | -5.15 |
| PA1855_r_at    | 10.72  | 7.20   | 0.643 | 1.49  |
| PA1856_at      | 12.48  | 8.13   | 0.484 | 1.54  |
| PA1857_at      | 198.82 | 202.20 | 0.643 | -1.02 |
| PA1858_str_at  | 42.12  | 40.20  | 0.817 | 1.05  |
| PA1859_at      | 41.18  | 33.50  | 0.151 | 1.23  |
| PA1860_at      | 17.14  | 18.40  | 0.817 | -1.07 |
| PA1861_modC_at | 65.08  | 44.72  | 0.008 | 1.46  |
| PA1862_modB_at | 78.56  | 73.45  | 0.349 | 1.07  |
| PA1863_modA_at | 91.46  | 83.63  | 0.238 | 1.09  |
| PA1864_at      | 18.94  | 13.60  | 0.349 | 1.39  |
| PA1865_at      | 120.46 | 38.72  | 0.008 | 3.11  |
| PA1866_at      | 73.60  | 47.57  | 0.048 | 1.55  |
| PA1867_at      | 13.40  | 9.93   | 0.151 | 1.35  |
| PA1868_xqhA_at | 26.78  | 33.08  | 0.349 | -1.24 |
| PA1869_at      | 171.24 | 203.48 | 0.349 | -1.19 |
| PA1870_at      | 13.12  | 15.40  | 0.643 | -1.17 |
| PA1871_lasA_at | 36.88  | 24.90  | 0.349 | 1.48  |
| PA1872_at      | 50.86  | 33.25  | 0.008 | 1.53  |
| PA1873_at      | 18.50  | 20.77  | 1.000 | -1.12 |
| PA1874_at      | 52.56  | 32.50  | 0.024 | 1.62  |
| PA1875_at      | 7.54   | 10.60  | 0.349 | -1.41 |
| PA1876_at      | 8.28   | 13.38  | 0.349 | -1.62 |
| PA1877_at      | 16.14  | 19.13  | 0.817 | -1.19 |
| PA1878_at      | 35.24  | 44.83  | 0.238 | -1.27 |
| PA1879_at      | 27.54  | 30.58  | 1.000 | -1.11 |
| PA1880_at      | 36.40  | 36.42  | 0.817 | -1.00 |
| PA1881_at      | 56.96  | 27.90  | 0.008 | 2.04  |
| PA1882_at      | 26.84  | 14.02  | 0.024 | 1.91  |
| PA1883_at      | 18.40  | 15.50  | 0.817 | 1.19  |

## Supplementary Table 1. Probe set signal data for experimental and control samples

|                |        |        |       |       |
|----------------|--------|--------|-------|-------|
| PA1884_at      | 16.34  | 19.33  | 0.151 | -1.18 |
| PA1885_at      | 26.60  | 20.13  | 0.238 | 1.32  |
| PA1886_polB_at | 37.12  | 27.90  | 0.016 | 1.33  |
| PA1887_at      | 8.02   | 2.82   | 0.087 | 2.84  |
| PA1888_at      | 3.70   | 12.10  | 0.008 | -3.27 |
| PA1889_at      | 25.32  | 21.50  | 0.151 | 1.18  |
| PA1890_at      | 49.54  | 56.35  | 0.238 | -1.14 |
| PA1891_at      | 16.64  | 20.00  | 0.484 | -1.20 |
| PA1892_at      | 20.94  | 20.65  | 1.000 | 1.01  |
| PA1893_at      | 53.78  | 49.38  | 0.817 | 1.09  |
| PA1894_at      | 112.60 | 119.52 | 0.643 | -1.06 |
| PA1895_at      | 99.08  | 105.10 | 0.349 | -1.06 |
| PA1896_at      | 62.86  | 78.72  | 0.643 | -1.25 |
| PA1897_at      | 118.20 | 129.55 | 0.484 | -1.10 |
| PA1898_at      | 41.88  | 29.55  | 0.024 | 1.42  |
| PA1901_s_at    | 111.12 | 90.10  | 0.151 | 1.23  |
| PA1902_s_at    | 13.78  | 18.58  | 0.349 | -1.35 |
| PA1903_s_at    | 66.56  | 78.45  | 0.238 | -1.18 |
| PA1904_s_at    | 24.34  | 28.63  | 0.484 | -1.18 |
| PA1905_s_at    | 67.38  | 57.47  | 0.484 | 1.17  |
| PA1906_at      | 31.46  | 21.90  | 0.087 | 1.44  |
| PA1907_at      | 11.90  | 6.65   | 0.151 | 1.79  |
| PA1908_at      | 7.88   | 8.05   | 0.349 | -1.02 |
| PA1909_at      | 7.94   | 12.88  | 0.238 | -1.62 |
| PA1910_at      | 24.46  | 16.95  | 0.143 | 1.44  |
| PA1911_at      | 24.96  | 21.60  | 0.643 | 1.16  |
| PA1912_at      | 42.56  | 36.53  | 0.349 | 1.17  |
| PA1913_at      | 120.12 | 122.53 | 0.817 | -1.02 |
| PA1914_at      | 7.30   | 7.53   | 0.817 | -1.03 |
| PA1915_at      | 16.74  | 11.50  | 0.238 | 1.46  |
| PA1916_at      | 4.42   | 8.45   | 0.349 | -1.91 |
| PA1917_at      | 5.58   | 6.15   | 1.000 | -1.10 |
| PA1918_at      | 12.44  | 14.22  | 0.635 | -1.14 |
| PA1919_at      | 6.22   | 2.92   | 0.238 | 2.13  |
| PA1920_at      | 23.50  | 24.42  | 1.000 | -1.04 |
| PA1921_at      | 3.44   | 6.27   | 0.151 | -1.82 |
| PA1922_at      | 13.22  | 7.38   | 0.484 | 1.79  |
| PA1923_at      | 14.66  | 19.67  | 0.484 | -1.34 |
| PA1924_at      | 11.36  | 11.88  | 0.817 | -1.05 |
| PA1925_at      | 14.80  | 14.88  | 0.643 | -1.01 |
| PA1926_at      | 66.62  | 83.85  | 0.024 | -1.26 |
| PA1927_metE_at | 6.14   | 9.47   | 0.238 | -1.54 |
| PA1928_rimJ_at | 30.56  | 49.25  | 0.048 | -1.61 |
| PA1929_i_at    | 29.40  | 24.32  | 0.484 | 1.21  |
| PA1930_at      | 12.98  | 13.15  | 0.905 | -1.01 |
| PA1931_at      | 20.78  | 16.25  | 0.484 | 1.28  |
| PA1932_at      | 18.80  | 20.25  | 0.643 | -1.08 |
| PA1933_at      | 19.36  | 17.20  | 0.349 | 1.13  |
| PA1934_at      | 34.58  | 38.52  | 0.151 | -1.11 |
| PA1935_at      | 18.72  | 12.48  | 0.008 | 1.50  |
| PA1936_at      | 7.88   | 9.98   | 0.730 | -1.27 |

### Supplementary Table 1. Probe set signal data for experimental and control samples

|                |         |         |       |       |
|----------------|---------|---------|-------|-------|
| PA1939_at      | 70.86   | 87.17   | 0.151 | -1.23 |
| PA1940_at      | 100.16  | 93.03   | 0.238 | 1.08  |
| PA1941_at      | 152.84  | 149.68  | 0.817 | 1.02  |
| PA1942_at      | 7.18    | 15.45   | 0.151 | -2.15 |
| PA1943_at      | 37.42   | 42.60   | 0.349 | -1.14 |
| PA1944_at      | 30.48   | 30.52   | 1.000 | -1.00 |
| PA1945_at      | 23.24   | 18.92   | 0.238 | 1.23  |
| PA1946_rbsB_at | 159.68  | 58.97   | 0.008 | 2.71  |
| PA1947_rbsA_at | 60.90   | 33.47   | 0.048 | 1.82  |
| PA1948_rbsC_at | 56.58   | 49.50   | 0.413 | 1.14  |
| PA1949_rbsR_at | 193.04  | 111.63  | 0.008 | 1.73  |
| PA1950_rbsK_at | 125.80  | 80.22   | 0.024 | 1.57  |
| PA1951_at      | 3.88    | 5.83    | 0.151 | -1.50 |
| PA1952_at      | 13.70   | 9.23    | 0.643 | 1.48  |
| PA1953_at      | 2.16    | 1.45    | 0.048 | 1.49  |
| PA1954_at      | 16.24   | 17.00   | 1.000 | -1.05 |
| PA1955_at      | 10.28   | 5.28    | 0.286 | 1.95  |
| PA1956_at      | 10.60   | 11.70   | 0.817 | -1.10 |
| PA1957_at      | 30.28   | 29.58   | 0.643 | 1.02  |
| PA1958_at      | 60.70   | 64.72   | 0.286 | -1.07 |
| PA1959_bacA_at | 89.00   | 119.53  | 0.151 | -1.34 |
| PA1960_at      | 29.78   | 29.07   | 0.817 | 1.02  |
| PA1961_at      | 7.38    | 17.60   | 0.008 | -2.38 |
| PA1962_at      | 8.08    | 11.15   | 0.905 | -1.38 |
| PA1963_at      | 29.08   | 31.05   | 0.817 | -1.07 |
| PA1964_at      | 180.36  | 219.18  | 0.349 | -1.22 |
| PA1965_at      | 44.64   | 59.32   | 0.008 | -1.33 |
| PA1966_at      | 15.70   | 59.38   | 0.008 | -3.78 |
| PA1967_at      | 50.02   | 73.00   | 0.008 | -1.46 |
| PA1968_at      | 77.82   | 92.28   | 0.048 | -1.19 |
| PA1969_at      | 193.24  | 150.52  | 0.151 | 1.28  |
| PA1970_at      | 10.52   | 18.20   | 0.151 | -1.73 |
| PA1971_braZ_at | 8.90    | 40.60   | 0.008 | -4.56 |
| PA1972_at      | 2.30    | 0.85    | 0.063 | 2.71  |
| PA1973_pqqF_at | 33.30   | 25.90   | 0.008 | 1.29  |
| PA1974_at      | 15.16   | 9.00    | 0.349 | 1.68  |
| PA1975_at      | 24.72   | 22.58   | 0.341 | 1.09  |
| PA1976_at      | 16.78   | 5.55    | 0.048 | 3.02  |
| PA1977_at      | 19.28   | 18.65   | 0.643 | 1.03  |
| PA1978_at      | 65.40   | 45.13   | 0.087 | 1.45  |
| PA1979_at      | 2.28    | 2.07    | 0.492 | 1.10  |
| PA1980_at      | 4.96    | 2.55    | 0.286 | 1.95  |
| PA1981_at      | 20.72   | 10.80   | 0.151 | 1.92  |
| PA1982_exaA_at | 13.40   | 10.43   | 0.349 | 1.28  |
| PA1983_exaB_at | 6.28    | 1.92    | 0.087 | 3.27  |
| PA1984_s_at    | 2858.00 | 1650.05 | 0.008 | 1.73  |
| PA1985_pqqA_at | 18.38   | 28.55   | 0.048 | -1.55 |
| PA1986_pqqB_at | 70.54   | 42.97   | 0.008 | 1.64  |
| PA1987_pqqC_at | 44.24   | 37.30   | 0.238 | 1.19  |
| PA1988_pqqD_at | 49.40   | 43.72   | 0.484 | 1.13  |
| PA1989_pqqE_at | 41.70   | 36.33   | 0.643 | 1.15  |

### Supplementary Table 1. Probe set signal data for experimental and control samples

|                  |         |         |       |       |
|------------------|---------|---------|-------|-------|
| PA1990_at        | 10.60   | 9.45    | 0.643 | 1.12  |
| PA1991_at        | 54.04   | 34.70   | 0.087 | 1.56  |
| PA1992_at        | 19.48   | 18.95   | 1.000 | 1.03  |
| PA1993_at        | 13.92   | 18.65   | 0.413 | -1.34 |
| PA1994_at        | 26.94   | 26.33   | 0.817 | 1.02  |
| PA1995_i_at      | 90.68   | 106.55  | 0.087 | -1.18 |
| PA1996_ppiC1_at  | 58.04   | 69.22   | 0.151 | -1.19 |
| PA1997_at        | 64.22   | 62.53   | 0.817 | 1.03  |
| PA1998_at        | 34.34   | 29.73   | 0.349 | 1.16  |
| PA1999_at        | 1642.54 | 966.73  | 0.024 | 1.70  |
| PA2000_at        | 918.10  | 806.10  | 0.349 | 1.14  |
| PA2001_atoB_at   | 751.48  | 579.20  | 0.048 | 1.30  |
| PA2002_at        | 53.46   | 40.20   | 0.048 | 1.33  |
| PA2003_bdhA_at   | 138.22  | 125.00  | 1.000 | 1.11  |
| PA2004_at        | 74.56   | 46.13   | 0.008 | 1.62  |
| PA2005_at        | 54.02   | 37.58   | 0.008 | 1.44  |
| PA2006_at        | 348.16  | 164.65  | 0.008 | 2.11  |
| PA2007_maiA_i_at | 952.56  | 483.58  | 0.008 | 1.97  |
| PA2008_fahA_at   | 3275.64 | 1511.10 | 0.008 | 2.17  |
| PA2009_hmgA_at   | 2244.54 | 1003.97 | 0.008 | 2.24  |
| PA2010_at        | 30.40   | 34.28   | 0.643 | -1.13 |
| PA2011_at        | 261.96  | 151.43  | 0.008 | 1.73  |
| PA2012_at        | 192.64  | 97.03   | 0.024 | 1.99  |
| PA2013_at        | 282.32  | 183.17  | 0.024 | 1.54  |
| PA2014_at        | 519.84  | 285.88  | 0.008 | 1.82  |
| PA2015_at        | 1473.12 | 775.63  | 0.008 | 1.90  |
| PA2016_at        | 543.34  | 392.15  | 0.087 | 1.39  |
| PA2017_at        | 16.66   | 16.45   | 1.000 | 1.01  |
| PA2018_at        | 38.54   | 26.60   | 0.079 | 1.45  |
| PA2019_at        | 174.56  | 95.43   | 0.024 | 1.83  |
| PA2020_at        | 68.54   | 57.20   | 0.238 | 1.20  |
| PA2021_at        | 9.92    | 8.70    | 1.000 | 1.14  |
| PA2022_at        | 18.66   | 14.67   | 0.643 | 1.27  |
| PA2023_galU_at   | 454.38  | 583.38  | 0.008 | -1.28 |
| PA2024_at        | 16.54   | 13.95   | 0.349 | 1.19  |
| PA2025_gor_at    | 139.06  | 110.05  | 0.024 | 1.26  |
| PA2026_at        | 17.82   | 26.58   | 0.024 | -1.49 |
| PA2027_at        | 19.10   | 21.75   | 0.151 | -1.14 |
| PA2028_at        | 25.22   | 45.43   | 0.008 | -1.80 |
| PA2029_i_at      | 16.86   | 29.10   | 0.008 | -1.73 |
| PA2030_at        | 30.44   | 53.70   | 0.008 | -1.76 |
| PA2031_i_at      | 165.60  | 168.93  | 0.817 | -1.02 |
| PA2032_at        | 20.26   | 17.67   | 0.484 | 1.15  |
| PA2033_at        | 15.54   | 17.07   | 0.817 | -1.10 |
| PA2034_at        | 2.04    | 12.40   | 0.008 | -6.08 |
| PA2035_at        | 17.34   | 13.72   | 0.238 | 1.26  |
| PA2036_at        | 5.66    | 8.58    | 0.238 | -1.52 |
| PA2037_at        | 7.08    | 13.25   | 0.024 | -1.87 |
| PA2038_at        | 45.32   | 49.82   | 1.000 | -1.10 |
| PA2039_at        | 55.06   | 45.63   | 0.087 | 1.21  |
| PA2041_at        | 43.52   | 34.55   | 0.024 | 1.26  |



### Supplementary Table 1. Probe set signal data for experimental and control samples

|                 |        |        |       |       |
|-----------------|--------|--------|-------|-------|
| PA2042_at       | 605.10 | 649.40 | 0.349 | -1.07 |
| PA2043_at       | 18.10  | 21.13  | 0.817 | -1.17 |
| PA2044_at       | 174.36 | 171.28 | 0.643 | 1.02  |
| PA2045_at       | 134.02 | 171.73 | 0.008 | -1.28 |
| PA2046_at       | 1.66   | 1.48   | 0.643 | 1.12  |
| PA2047_at       | 37.14  | 28.50  | 0.151 | 1.30  |
| PA2048_at       | 8.88   | 10.05  | 0.643 | -1.13 |
| PA2049_at       | 66.28  | 65.82  | 0.817 | 1.01  |
| PA2050_at       | 17.34  | 21.45  | 0.349 | -1.24 |
| PA2051_at       | 8.86   | 9.23   | 0.817 | -1.04 |
| PA2052_cynS_at  | 36.60  | 34.03  | 1.000 | 1.08  |
| PA2053_cynT_at  | 17.12  | 18.77  | 0.643 | -1.10 |
| PA2054_cynR_at  | 23.52  | 22.63  | 0.905 | 1.04  |
| PA2055_at       | 16.60  | 8.63   | 0.048 | 1.92  |
| PA2056_at       | 20.80  | 15.05  | 0.048 | 1.38  |
| PA2057_at       | 2.16   | 1.35   | 0.048 | 1.60  |
| PA2058_at       | 4.54   | 9.63   | 0.032 | -2.12 |
| PA2059_at       | 16.92  | 10.70  | 0.349 | 1.58  |
| PA2060_at       | 10.74  | 9.07   | 0.484 | 1.18  |
| PA2061_at       | 9.64   | 3.22   | 0.008 | 2.99  |
| PA2062_at       | 27.26  | 38.95  | 0.238 | -1.43 |
| PA2063_at       | 75.32  | 84.95  | 0.048 | -1.13 |
| PA2064_pcoB_at  | 13.26  | 15.52  | 0.643 | -1.17 |
| PA2065_pcoA_at  | 4.12   | 10.48  | 0.087 | -2.54 |
| PA2066_at       | 28.72  | 30.25  | 0.817 | -1.05 |
| PA2067_at       | 25.44  | 23.90  | 0.817 | 1.06  |
| PA2068_at       | 13.22  | 11.45  | 0.349 | 1.15  |
| PA2069_at       | 23.24  | 24.97  | 0.643 | -1.07 |
| PA2070_at       | 2.62   | 2.63   | 0.643 | -1.00 |
| PA2071_fusA2_at | 22.30  | 21.88  | 0.349 | 1.02  |
| PA2072_at       | 3.48   | 10.25  | 0.048 | -2.95 |
| PA2073_at       | 3.56   | 2.58   | 0.905 | 1.38  |
| PA2074_at       | 16.80  | 16.45  | 0.817 | 1.02  |
| PA2075_at       | 20.30  | 22.62  | 0.817 | -1.11 |
| PA2076_at       | 49.82  | 57.85  | 0.151 | -1.16 |
| PA2077_at       | 15.44  | 12.05  | 0.238 | 1.28  |
| PA2078_at       | 4.54   | 3.72   | 0.643 | 1.22  |
| PA2079_at       | 24.38  | 52.28  | 0.151 | -2.14 |
| PA2080_at       | 353.14 | 391.72 | 0.238 | -1.11 |
| PA2081_at       | 224.40 | 288.70 | 0.048 | -1.29 |
| PA2082_at       | 19.18  | 40.15  | 0.024 | -2.09 |
| PA2083_at       | 18.32  | 28.50  | 0.048 | -1.56 |
| PA2084_at       | 9.88   | 15.80  | 0.151 | -1.60 |
| PA2085_at       | 18.00  | 14.15  | 0.484 | 1.27  |
| PA2086_at       | 12.82  | 14.72  | 0.484 | -1.15 |
| PA2087_at       | 9.84   | 5.33   | 0.151 | 1.85  |
| PA2088_at       | 1.32   | 2.30   | 0.008 | -1.74 |
| PA2089_at       | 17.52  | 17.85  | 0.349 | -1.02 |
| PA2090_at       | 6.24   | 9.05   | 0.151 | -1.45 |
| PA2091_at       | 2.26   | 4.93   | 0.349 | -2.18 |
| PA2092_at       | 12.34  | 9.95   | 0.349 | 1.24  |

**Supplementary Table 1. Probe set signal data for experimental and control samples**

|               |        |        |       |       |
|---------------|--------|--------|-------|-------|
| PA2093_at     | 5.38   | 16.20  | 0.008 | -3.01 |
| PA2094_at     | 17.48  | 22.65  | 0.238 | -1.30 |
| PA2095_at     | 10.72  | 7.80   | 0.349 | 1.37  |
| PA2096_at     | 23.02  | 19.55  | 0.238 | 1.18  |
| PA2097_at     | 17.80  | 13.05  | 0.087 | 1.36  |
| PA2098_at     | 19.32  | 25.95  | 0.151 | -1.34 |
| PA2099_at     | 8.56   | 8.50   | 0.484 | 1.01  |
| PA2100_at     | 17.78  | 23.02  | 0.349 | -1.29 |
| PA2101_at     | 13.50  | 10.50  | 0.238 | 1.29  |
| PA2102_at     | 17.90  | 13.98  | 0.484 | 1.28  |
| PA2103_at     | 41.84  | 31.85  | 0.079 | 1.31  |
| PA2104_at     | 34.86  | 30.72  | 0.817 | 1.13  |
| PA2105_at     | 35.22  | 35.83  | 0.817 | -1.02 |
| PA2106_at     | 25.92  | 19.95  | 0.238 | 1.30  |
| PA2107_at     | 27.24  | 28.10  | 0.643 | -1.03 |
| PA2108_at     | 8.72   | 18.17  | 0.048 | -2.08 |
| PA2109_at     | 67.72  | 59.87  | 0.484 | 1.13  |
| PA2110_at     | 372.20 | 225.00 | 0.008 | 1.65  |
| PA2111_at     | 408.60 | 388.40 | 0.643 | 1.05  |
| PA2112_at     | 867.66 | 585.90 | 0.024 | 1.48  |
| PA2113_at     | 677.46 | 432.72 | 0.024 | 1.57  |
| PA2114_at     | 304.26 | 242.43 | 0.349 | 1.26  |
| PA2115_at     | 45.26  | 49.80  | 0.484 | -1.10 |
| PA2116_at     | 70.28  | 66.57  | 0.643 | 1.06  |
| PA2117_at     | 40.70  | 41.55  | 0.556 | -1.02 |
| PA2118_ada_at | 12.20  | 23.38  | 0.008 | -1.92 |
| PA2119_at     | 30.06  | 47.28  | 0.151 | -1.57 |
| PA2120_at     | 12.32  | 14.88  | 0.643 | -1.21 |
| PA2121_at     | 26.30  | 25.25  | 0.643 | 1.04  |
| PA2122_at     | 2.84   | 2.95   | 0.611 | -1.04 |
| PA2123_at     | 29.22  | 22.18  | 0.238 | 1.32  |
| PA2124_at     | 6.82   | 7.35   | 0.905 | -1.08 |
| PA2125_at     | 21.78  | 25.78  | 0.643 | -1.18 |
| PA2126_at     | 33.32  | 41.72  | 0.087 | -1.25 |
| PA2127_at     | 85.56  | 69.95  | 0.238 | 1.22  |
| PA2128_at     | 29.76  | 26.10  | 0.817 | 1.14  |
| PA2129_at     | 4.72   | 5.88   | 0.730 | -1.25 |
| PA2130_at     | 14.48  | 16.92  | 0.484 | -1.17 |
| PA2131_at     | 20.00  | 14.25  | 0.087 | 1.40  |
| PA2132_at     | 13.56  | 10.85  | 0.817 | 1.25  |
| PA2133_at     | 2.94   | 4.72   | 0.556 | -1.61 |
| PA2134_at     | 28.54  | 32.20  | 0.817 | -1.13 |
| PA2135_at     | 12.82  | 9.32   | 0.111 | 1.38  |
| PA2136_at     | 10.14  | 3.73   | 0.349 | 2.72  |
| PA2137_at     | 3.96   | 6.68   | 0.190 | -1.69 |
| PA2138_at     | 7.40   | 5.88   | 0.349 | 1.26  |
| PA2139_r_at   | 4.82   | 11.40  | 0.151 | -2.37 |
| PA2140_at     | 6.04   | 15.50  | 0.032 | -2.57 |
| PA2141_at     | 4.40   | 3.30   | 0.817 | 1.33  |
| PA2142_at     | 5.62   | 10.47  | 0.151 | -1.86 |
| PA2143_at     | 4.90   | 2.45   | 0.230 | 2.00  |

### Supplementary Table 1. Probe set signal data for experimental and control samples

|                |        |        |       |       |
|----------------|--------|--------|-------|-------|
| PA2144_glgP_at | 5.14   | 17.52  | 0.008 | -3.41 |
| PA2145_at      | 35.80  | 13.40  | 0.008 | 2.67  |
| PA2146_i_at    | 8.80   | 16.50  | 0.151 | -1.88 |
| PA2147_katE_at | 1.42   | 1.70   | 0.635 | -1.20 |
| PA2148_at      | 10.54  | 16.17  | 0.238 | -1.53 |
| PA2149_at      | 18.48  | 21.73  | 0.643 | -1.18 |
| PA2150_at      | 2.32   | 4.90   | 0.556 | -2.11 |
| PA2151_at      | 2.16   | 1.80   | 0.794 | 1.20  |
| PA2152_at      | 14.34  | 14.57  | 0.817 | -1.02 |
| PA2153_glgB_at | 6.88   | 10.70  | 0.087 | -1.56 |
| PA2154_at      | 1.82   | 6.47   | 0.024 | -3.55 |
| PA2155_at      | 2.90   | 3.57   | 1.000 | -1.23 |
| PA2156_at      | 0.86   | 0.70   | 0.817 | 1.23  |
| PA2157_at      | 18.22  | 16.27  | 0.643 | 1.12  |
| PA2158_at      | 5.12   | 6.43   | 0.341 | -1.26 |
| PA2159_at      | 11.48  | 13.45  | 0.349 | -1.17 |
| PA2160_at      | 28.00  | 19.58  | 0.087 | 1.43  |
| PA2161_at      | 2.52   | 2.22   | 0.905 | 1.14  |
| PA2162_at      | 7.90   | 13.68  | 0.151 | -1.73 |
| PA2163_at      | 9.08   | 9.23   | 0.643 | -1.02 |
| PA2164_at      | 19.04  | 14.52  | 0.238 | 1.31  |
| PA2165_at      | 12.60  | 11.25  | 0.238 | 1.12  |
| PA2166_at      | 17.86  | 15.02  | 0.484 | 1.19  |
| PA2167_at      | 2.00   | 5.63   | 0.032 | -2.82 |
| PA2168_at      | 22.06  | 25.20  | 0.817 | -1.14 |
| PA2169_at      | 18.46  | 22.28  | 0.643 | -1.21 |
| PA2170_at      | 5.80   | 6.28   | 0.905 | -1.08 |
| PA2171_at      | 21.16  | 11.98  | 0.087 | 1.77  |
| PA2172_at      | 10.44  | 12.20  | 0.349 | -1.17 |
| PA2173_at      | 11.38  | 10.02  | 0.817 | 1.14  |
| PA2174_at      | 15.62  | 10.27  | 0.349 | 1.52  |
| PA2175_at      | 10.96  | 18.50  | 0.048 | -1.69 |
| PA2176_at      | 5.16   | 3.10   | 0.992 | 1.66  |
| PA2177_at      | 25.50  | 22.88  | 0.643 | 1.11  |
| PA2178_at      | 12.74  | 12.77  | 1.000 | -1.00 |
| PA2179_at      | 6.04   | 1.80   | 0.349 | 3.36  |
| PA2180_at      | 13.18  | 15.60  | 0.643 | -1.18 |
| PA2181_at      | 14.32  | 12.45  | 1.000 | 1.15  |
| PA2182_at      | 5.74   | 7.80   | 0.349 | -1.36 |
| PA2183_at      | 5.62   | 2.60   | 0.151 | 2.16  |
| PA2184_at      | 14.88  | 16.40  | 0.643 | -1.10 |
| PA2185_at      | 2.60   | 8.32   | 0.048 | -3.20 |
| PA2186_r_at    | 13.56  | 20.32  | 0.349 | -1.50 |
| PA2187_at      | 18.58  | 9.13   | 0.008 | 2.04  |
| PA2188_at      | 4.90   | 6.25   | 0.643 | -1.28 |
| PA2189_at      | 9.56   | 10.02  | 0.817 | -1.05 |
| PA2190_at      | 3.18   | 3.50   | 0.643 | -1.10 |
| PA2191_exoY_at | 14.14  | 11.92  | 1.000 | 1.19  |
| PA2192_at      | 1.40   | 2.25   | 0.730 | -1.61 |
| PA2193_hcnA_at | 198.68 | 344.17 | 0.008 | -1.73 |
| PA2194_hcnB_at | 301.64 | 354.07 | 0.484 | -1.17 |

### Supplementary Table 1. Probe set signal data for experimental and control samples

|                |        |        |       |       |
|----------------|--------|--------|-------|-------|
| PA2195_hcnC_at | 125.72 | 121.22 | 0.643 | 1.04  |
| PA2196_at      | 39.58  | 46.13  | 0.087 | -1.17 |
| PA2197_at      | 136.82 | 112.27 | 0.048 | 1.22  |
| PA2198_at      | 58.16  | 67.43  | 0.151 | -1.16 |
| PA2199_at      | 59.36  | 93.50  | 0.008 | -1.58 |
| PA2200_at      | 23.94  | 28.20  | 0.817 | -1.18 |
| PA2201_at      | 45.34  | 32.00  | 0.048 | 1.42  |
| PA2202_at      | 9.52   | 18.85  | 0.087 | -1.98 |
| PA2203_at      | 28.08  | 34.13  | 0.643 | -1.22 |
| PA2204_at      | 142.84 | 312.98 | 0.151 | -2.19 |
| PA2205_at      | 35.60  | 32.58  | 0.643 | 1.09  |
| PA2206_at      | 26.44  | 19.70  | 0.024 | 1.34  |
| PA2207_at      | 8.78   | 9.60   | 0.643 | -1.09 |
| PA2208_at      | 14.76  | 8.23   | 0.087 | 1.79  |
| PA2209_at      | 6.76   | 9.57   | 0.190 | -1.42 |
| PA2210_at      | 17.16  | 17.77  | 0.817 | -1.04 |
| PA2211_at      | 5.34   | 12.23  | 0.024 | -2.29 |
| PA2212_at      | 25.06  | 36.22  | 0.087 | -1.45 |
| PA2213_at      | 5.84   | 5.80   | 0.817 | 1.01  |
| PA2214_at      | 6.90   | 6.00   | 0.817 | 1.15  |
| PA2215_at      | 4.02   | 3.88   | 0.730 | 1.04  |
| PA2216_at      | 32.30  | 27.05  | 0.349 | 1.19  |
| PA2217_at      | 2.86   | 2.52   | 0.817 | 1.13  |
| PA2218_at      | 24.26  | 31.88  | 0.087 | -1.31 |
| PA2219_opdE_at | 16.00  | 15.02  | 0.349 | 1.07  |
| PA2220_at      | 32.08  | 31.35  | 0.643 | 1.02  |
| PA2221_at      | 12.38  | 5.98   | 0.151 | 2.07  |
| PA2222_at      | 8.54   | 11.05  | 0.238 | -1.29 |
| PA2223_at      | 17.02  | 19.80  | 0.238 | -1.16 |
| PA2224_at      | 3.00   | 1.68   | 0.111 | 1.79  |
| PA2225_at      | 10.48  | 13.30  | 0.817 | -1.27 |
| PA2226_at      | 4.54   | 6.20   | 0.151 | -1.37 |
| PA2227_at      | 11.18  | 7.25   | 0.111 | 1.54  |
| PA2228_at      | 3.00   | 0.60   | 0.008 | 5.00  |
| PA2229_at      | 64.02  | 65.80  | 0.817 | -1.03 |
| PA2230_at      | 59.30  | 58.15  | 0.817 | 1.02  |
| PA2231_at      | 122.86 | 126.80 | 0.817 | -1.03 |
| PA2232_at      | 153.24 | 171.30 | 0.151 | -1.12 |
| PA2233_at      | 138.84 | 115.70 | 0.349 | 1.20  |
| PA2234_at      | 253.86 | 330.00 | 0.079 | -1.30 |
| PA2235_at      | 178.74 | 204.85 | 0.151 | -1.15 |
| PA2236_at      | 146.98 | 196.38 | 0.024 | -1.34 |
| PA2237_at      | 76.00  | 90.32  | 0.238 | -1.19 |
| PA2238_at      | 49.96  | 57.30  | 0.349 | -1.15 |
| PA2239_at      | 45.32  | 55.57  | 0.048 | -1.23 |
| PA2240_at      | 38.62  | 42.82  | 0.349 | -1.11 |
| PA2241_at      | 24.56  | 29.10  | 0.151 | -1.18 |
| PA2242_at      | 78.58  | 86.52  | 0.643 | -1.10 |
| PA2243_at      | 22.66  | 14.70  | 0.349 | 1.54  |
| PA2244_at      | 10.98  | 8.82   | 0.349 | 1.24  |
| PA2245_at      | 2.76   | 3.30   | 0.643 | -1.20 |

## Supplementary Table 1. Probe set signal data for experimental and control samples

|                 |         |         |       |       |
|-----------------|---------|---------|-------|-------|
| PA2246_bkdR_at  | 47.88   | 46.20   | 0.484 | 1.04  |
| PA2247_bkdA1_at | 2145.82 | 1002.33 | 0.008 | 2.14  |
| PA2248_bkdA2_at | 1414.54 | 575.22  | 0.008 | 2.46  |
| PA2249_bkdB_at  | 676.44  | 415.92  | 0.008 | 1.63  |
| PA2250_lpdV_at  | 537.80  | 338.30  | 0.024 | 1.59  |
| PA2251_at       | 10.76   | 25.27   | 0.008 | -2.35 |
| PA2252_at       | 30.02   | 274.73  | 0.238 | -9.15 |
| PA2253_ansA_at  | 68.54   | 143.88  | 0.643 | -2.10 |
| PA2254_pvcA_at  | 8.98    | 5.50    | 0.484 | 1.63  |
| PA2255_pvcB_at  | 2.36    | 3.35    | 0.349 | -1.42 |
| PA2256_pvcC_at  | 9.86    | 13.07   | 0.643 | -1.33 |
| PA2257_pvcD_at  | 14.02   | 10.10   | 0.643 | 1.39  |
| PA2258_ptxR_at  | 2.82    | 3.38    | 0.643 | -1.20 |
| PA2259_ptxS_at  | 115.62  | 83.68   | 0.238 | 1.38  |
| PA2260_at       | 29.56   | 25.13   | 0.484 | 1.18  |
| PA2261_at       | 8.98    | 7.17    | 0.349 | 1.25  |
| PA2262_at       | 12.68   | 9.80    | 0.190 | 1.29  |
| PA2263_at       | 20.50   | 20.92   | 0.984 | -1.02 |
| PA2264_at       | 84.14   | 115.05  | 0.008 | -1.37 |
| PA2265_at       | 113.18  | 126.05  | 0.238 | -1.11 |
| PA2266_at       | 82.08   | 64.90   | 0.024 | 1.26  |
| PA2267_at       | 43.06   | 46.67   | 0.484 | -1.08 |
| PA2268_at       | 18.50   | 14.13   | 0.230 | 1.31  |
| PA2269_at       | 23.94   | 26.42   | 0.643 | -1.10 |
| PA2270_at       | 248.52  | 208.20  | 0.024 | 1.19  |
| PA2271_i_at     | 79.98   | 68.45   | 0.048 | 1.17  |
| PA2272_pbpC_at  | 13.90   | 15.85   | 0.817 | -1.14 |
| PA2273_at       | 17.44   | 29.97   | 0.048 | -1.72 |
| PA2274_at       | 23.30   | 21.22   | 0.643 | 1.10  |
| PA2275_at       | 14.48   | 16.63   | 0.349 | -1.15 |
| PA2276_at       | 10.08   | 8.93    | 1.000 | 1.13  |
| PA2277_arsR_at  | 32.10   | 36.63   | 0.238 | -1.14 |
| PA2278_arsB_at  | 22.72   | 24.67   | 0.349 | -1.09 |
| PA2279_arsC_at  | 42.40   | 59.60   | 0.008 | -1.41 |
| PA2280_at       | 23.76   | 32.95   | 0.151 | -1.39 |
| PA2281_at       | 65.30   | 72.18   | 0.484 | -1.11 |
| PA2282_at       | 32.64   | 29.12   | 0.635 | 1.12  |
| PA2283_at       | 14.30   | 15.35   | 0.817 | -1.07 |
| PA2284_at       | 3.78    | 10.07   | 0.008 | -2.66 |
| PA2285_at       | 31.30   | 59.17   | 0.008 | -1.89 |
| PA2286_at       | 27.42   | 35.28   | 0.048 | -1.29 |
| PA2287_at       | 13.64   | 13.55   | 0.817 | 1.01  |
| PA2288_r_at     | 449.34  | 43.72   | 0.008 | 10.28 |
| PA2289_at       | 25.22   | 27.65   | 0.468 | -1.10 |
| PA2290_gcd_at   | 168.82  | 195.55  | 0.484 | -1.16 |
| PA2292_at       | 3.26    | 13.50   | 0.008 | -4.14 |
| PA2293_at       | 3.64    | 4.93    | 0.151 | -1.35 |
| PA2294_at       | 20.32   | 19.05   | 0.817 | 1.07  |
| PA2295_at       | 8.64    | 12.02   | 0.286 | -1.39 |
| PA2296_at       | 17.50   | 10.63   | 0.341 | 1.65  |
| PA2297_at       | 35.96   | 31.73   | 0.643 | 1.13  |

## Supplementary Table 1. Probe set signal data for experimental and control samples

|                |        |        |       |       |
|----------------|--------|--------|-------|-------|
| PA2298_at      | 30.14  | 37.83  | 0.238 | -1.26 |
| PA2299_at      | 29.68  | 28.45  | 1.000 | 1.04  |
| PA2300_chiC_at | 19.88  | 26.45  | 0.484 | -1.33 |
| PA2301_at      | 23.82  | 33.97  | 0.087 | -1.43 |
| PA2302_at      | 39.18  | 28.77  | 0.008 | 1.36  |
| PA2303_at      | 23.74  | 33.75  | 0.349 | -1.42 |
| PA2304_at      | 75.28  | 61.68  | 0.151 | 1.22  |
| PA2305_at      | 100.06 | 100.32 | 0.643 | -1.00 |
| PA2306_at      | 71.82  | 61.75  | 0.151 | 1.16  |
| PA2307_at      | 10.04  | 4.22   | 0.349 | 2.38  |
| PA2308_at      | 1.88   | 5.03   | 0.024 | -2.68 |
| PA2309_at      | 8.64   | 9.02   | 0.643 | -1.04 |
| PA2310_at      | 3.04   | 8.73   | 0.024 | -2.87 |
| PA2311_r_at    | 49.18  | 59.23  | 0.349 | -1.20 |
| PA2312_at      | 17.08  | 21.20  | 0.484 | -1.24 |
| PA2313_at      | 8.14   | 7.32   | 0.817 | 1.11  |
| PA2314_at      | 8.14   | 3.98   | 0.024 | 2.05  |
| PA2315_at      | 9.78   | 13.83  | 0.484 | -1.41 |
| PA2316_at      | 23.44  | 20.17  | 0.643 | 1.16  |
| PA2317_at      | 27.14  | 34.92  | 0.151 | -1.29 |
| PA2318_at      | 37.96  | 55.55  | 0.024 | -1.46 |
| PA2320_gntR_at | 86.06  | 70.80  | 0.349 | 1.22  |
| PA2321_at      | 61.24  | 93.45  | 0.111 | -1.53 |
| PA2322_at      | 43.62  | 53.90  | 0.484 | -1.24 |
| PA2323_at      | 184.44 | 128.68 | 0.008 | 1.43  |
| PA2324_at      | 10.78  | 8.10   | 0.484 | 1.33  |
| PA2325_at      | 12.60  | 21.00  | 0.087 | -1.67 |
| PA2326_at      | 8.46   | 19.90  | 0.008 | -2.35 |
| PA2327_at      | 19.56  | 12.55  | 0.151 | 1.56  |
| PA2328_at      | 30.34  | 26.52  | 0.643 | 1.14  |
| PA2329_at      | 25.32  | 20.28  | 0.087 | 1.25  |
| PA2330_at      | 26.16  | 28.30  | 0.349 | -1.08 |
| PA2331_at      | 46.24  | 38.15  | 0.484 | 1.21  |
| PA2332_at      | 83.26  | 72.18  | 0.349 | 1.15  |
| PA2333_at      | 7.96   | 12.38  | 0.238 | -1.56 |
| PA2334_at      | 5.18   | 23.02  | 0.008 | -4.44 |
| PA2335_at      | 8.92   | 6.20   | 0.643 | 1.44  |
| PA2336_at      | 28.08  | 14.57  | 0.048 | 1.93  |
| PA2337_mtlR_at | 23.78  | 17.77  | 0.238 | 1.34  |
| PA2338_at      | 28.50  | 13.63  | 0.008 | 2.09  |
| PA2339_at      | 11.12  | 6.22   | 0.238 | 1.79  |
| PA2340_at      | 5.70   | 10.95  | 0.151 | -1.92 |
| PA2341_at      | 16.96  | 28.23  | 0.151 | -1.66 |
| PA2342_mtlD_at | 6.70   | 10.35  | 0.151 | -1.54 |
| PA2343_mtlY_at | 11.14  | 13.13  | 0.810 | -1.18 |
| PA2344_mtlZ_at | 48.04  | 54.90  | 0.238 | -1.14 |
| PA2345_at      | 20.18  | 36.28  | 0.008 | -1.80 |
| PA2346_at      | 5.98   | 8.85   | 0.484 | -1.48 |
| PA2347_at      | 4.56   | 8.60   | 0.087 | -1.89 |
| PA2348_at      | 9.02   | 6.63   | 0.643 | 1.36  |
| PA2349_at      | 28.86  | 24.20  | 0.341 | 1.19  |

## Supplementary Table 1. Probe set signal data for experimental and control samples

|                |        |        |       |       |
|----------------|--------|--------|-------|-------|
| PA2350_at      | 10.52  | 21.98  | 0.063 | -2.09 |
| PA2351_at      | 18.62  | 15.55  | 0.817 | 1.20  |
| PA2352_at      | 59.02  | 80.90  | 0.024 | -1.37 |
| PA2353_at      | 28.64  | 21.38  | 0.008 | 1.34  |
| PA2354_at      | 14.42  | 9.30   | 0.032 | 1.55  |
| PA2355_at      | 9.28   | 8.95   | 0.643 | 1.04  |
| PA2356_msuD_at | 4.98   | 5.25   | 1.000 | -1.05 |
| PA2357_msuE_at | 7.32   | 9.60   | 0.556 | -1.31 |
| PA2358_at      | 36.90  | 34.65  | 0.643 | 1.06  |
| PA2359_at      | 4.98   | 12.20  | 0.008 | -2.45 |
| PA2360_at      | 31.18  | 31.03  | 1.000 | 1.00  |
| PA2361_at      | 20.26  | 12.55  | 0.008 | 1.61  |
| PA2362_at      | 19.08  | 8.73   | 0.151 | 2.19  |
| PA2363_at      | 31.90  | 19.48  | 0.008 | 1.64  |
| PA2364_at      | 39.86  | 27.33  | 0.008 | 1.46  |
| PA2365_at      | 40.82  | 23.85  | 0.008 | 1.71  |
| PA2366_at      | 18.18  | 30.58  | 0.008 | -1.68 |
| PA2367_at      | 18.26  | 16.02  | 0.349 | 1.14  |
| PA2368_i_at    | 23.74  | 32.13  | 0.087 | -1.35 |
| PA2369_at      | 19.60  | 28.73  | 0.087 | -1.47 |
| PA2370_at      | 24.72  | 12.72  | 0.008 | 1.94  |
| PA2371_at      | 16.12  | 14.53  | 0.817 | 1.11  |
| PA2372_at      | 16.40  | 2.90   | 0.008 | 5.66  |
| PA2373_at      | 13.80  | 30.45  | 0.008 | -2.21 |
| PA2374_at      | 9.14   | 13.00  | 0.349 | -1.42 |
| PA2375_i_at    | 10.40  | 8.88   | 0.643 | 1.17  |
| PA2376_at      | 19.68  | 18.23  | 0.349 | 1.08  |
| PA2377_at      | 12.00  | 12.15  | 1.000 | -1.01 |
| PA2378_at      | 259.12 | 141.05 | 0.008 | 1.84  |
| PA2379_at      | 209.24 | 188.60 | 0.817 | 1.11  |
| PA2380_at      | 33.36  | 50.15  | 0.024 | -1.50 |
| PA2381_at      | 138.68 | 102.00 | 0.151 | 1.36  |
| PA2382_ildA_at | 24.36  | 17.73  | 0.341 | 1.37  |
| PA2383_at      | 51.64  | 45.42  | 0.484 | 1.14  |
| PA2384_at      | 10.56  | 41.92  | 0.008 | -3.97 |
| PA2385_at      | 21.26  | 31.88  | 0.151 | -1.50 |
| PA2386_pvdA_at | 17.92  | 53.20  | 0.048 | -2.97 |
| PA2387_at      | 25.40  | 40.53  | 0.024 | -1.60 |
| PA2388_at      | 151.92 | 183.67 | 0.024 | -1.21 |
| PA2389_at      | 49.78  | 77.25  | 0.008 | -1.55 |
| PA2390_at      | 56.48  | 73.55  | 0.151 | -1.30 |
| PA2391_at      | 33.32  | 54.42  | 0.008 | -1.63 |
| PA2392_at      | 14.66  | 16.88  | 0.238 | -1.15 |
| PA2393_at      | 10.22  | 29.70  | 0.024 | -2.91 |
| PA2394_at      | 24.36  | 40.58  | 0.151 | -1.67 |
| PA2395_at      | 13.30  | 46.43  | 0.024 | -3.49 |
| PA2396_at      | 17.86  | 30.53  | 0.048 | -1.71 |
| PA2397_pvdE_at | 17.22  | 24.75  | 0.349 | -1.44 |
| PA2398_fpvA_at | 99.54  | 566.10 | 0.008 | -5.69 |
| PA2399_pvdD_at | 27.88  | 29.13  | 0.817 | -1.04 |
| PA2400_at      | 14.78  | 8.33   | 0.413 | 1.77  |

**Supplementary Table 1. Probe set signal data for experimental and control samples**

|                 |         |        |       |       |
|-----------------|---------|--------|-------|-------|
| PA2401_at       | 14.06   | 12.98  | 1.000 | 1.08  |
| PA2402_at       | 22.78   | 27.63  | 0.484 | -1.21 |
| PA2403_at       | 53.66   | 173.75 | 0.008 | -3.24 |
| PA2404_at       | 45.56   | 138.13 | 0.008 | -3.03 |
| PA2405_at       | 46.90   | 181.08 | 0.008 | -3.86 |
| PA2406_at       | 61.44   | 113.25 | 0.008 | -1.84 |
| PA2407_at       | 91.84   | 300.93 | 0.008 | -3.28 |
| PA2408_at       | 35.82   | 103.70 | 0.008 | -2.90 |
| PA2409_at       | 50.86   | 188.55 | 0.008 | -3.71 |
| PA2410_at       | 38.20   | 94.38  | 0.008 | -2.47 |
| PA2411_at       | 6.42    | 35.63  | 0.024 | -5.55 |
| PA2412_at       | 7.06    | 47.28  | 0.024 | -6.70 |
| PA2413_at       | 12.26   | 29.88  | 0.048 | -2.44 |
| PA2414_at       | 16.32   | 9.05   | 0.087 | 1.80  |
| PA2415_at       | 41.18   | 22.88  | 0.151 | 1.80  |
| PA2416_treA_at  | 20.00   | 28.38  | 0.238 | -1.42 |
| PA2417_at       | 15.68   | 11.50  | 0.079 | 1.36  |
| PA2418_at       | 14.04   | 11.67  | 0.484 | 1.20  |
| PA2419_at       | 7.10    | 6.53   | 0.643 | 1.09  |
| PA2420_at       | 13.34   | 8.68   | 0.484 | 1.54  |
| PA2421_at       | 17.06   | 13.70  | 0.484 | 1.25  |
| PA2422_at       | 13.06   | 17.52  | 0.286 | -1.34 |
| PA2423_at       | 39.46   | 54.72  | 0.048 | -1.39 |
| PA2424_at       | 9.20    | 13.95  | 0.238 | -1.52 |
| PA2425_at       | 8.98    | 16.27  | 0.238 | -1.81 |
| PA2426_pvdS_at  | 21.00   | 62.95  | 0.024 | -3.00 |
| PA2427_at       | 6.14    | 13.90  | 0.008 | -2.26 |
| PA2428_at       | 24.78   | 16.67  | 0.151 | 1.49  |
| PA2429_at       | 12.08   | 10.20  | 1.000 | 1.18  |
| PA2430_at       | 16.18   | 21.05  | 0.341 | -1.30 |
| PA2431_at       | 21.06   | 17.90  | 0.087 | 1.18  |
| PA2432_at       | 50.08   | 36.40  | 0.008 | 1.38  |
| PA2433_at       | 30.88   | 28.35  | 0.643 | 1.09  |
| PA2434_at       | 36.90   | 20.07  | 0.008 | 1.84  |
| PA2435_at       | 19.52   | 14.35  | 0.151 | 1.36  |
| PA2436_at       | 53.44   | 62.13  | 0.238 | -1.16 |
| PA2437_at       | 28.62   | 21.35  | 0.048 | 1.34  |
| PA2438_at       | 4.54    | 8.15   | 0.238 | -1.80 |
| PA2439_at       | 2.92    | 2.47   | 0.730 | 1.18  |
| PA2440_at       | 31.30   | 26.85  | 0.349 | 1.17  |
| PA2441_at       | 6.10    | 9.55   | 0.286 | -1.57 |
| PA2442_gcvT2_at | 152.58  | 160.48 | 1.000 | -1.05 |
| PA2443_sdaA_at  | 154.80  | 170.65 | 0.643 | -1.10 |
| PA2444_glyA2_at | 145.42  | 221.80 | 0.048 | -1.53 |
| PA2445_gcvP2_at | 1095.08 | 818.52 | 0.008 | 1.34  |
| PA2446_gcvH2_at | 694.42  | 564.15 | 0.238 | 1.23  |
| PA2447_at       | 37.88   | 22.58  | 0.087 | 1.68  |
| PA2448_at       | 23.68   | 23.03  | 0.992 | 1.03  |
| PA2449_at       | 51.76   | 43.77  | 0.238 | 1.18  |
| PA2450_at       | 111.44  | 90.05  | 0.151 | 1.24  |
| PA2451_at       | 31.48   | 24.15  | 0.151 | 1.30  |



**Supplementary Table 1. Probe set signal data for experimental and control samples**

|                |        |        |       |       |
|----------------|--------|--------|-------|-------|
| PA2452_at      | 17.64  | 27.83  | 0.151 | -1.58 |
| PA2453_at      | 198.12 | 390.38 | 0.008 | -1.97 |
| PA2454_at      | 79.88  | 108.30 | 0.087 | -1.36 |
| PA2455_at      | 51.04  | 63.00  | 0.087 | -1.23 |
| PA2456_at      | 24.86  | 33.08  | 0.024 | -1.33 |
| PA2457_at      | 27.68  | 42.40  | 0.087 | -1.53 |
| PA2458_at      | 9.44   | 9.83   | 1.000 | -1.04 |
| PA2459_at      | 20.04  | 24.87  | 0.349 | -1.24 |
| PA2460_i_at    | 58.90  | 90.07  | 0.008 | -1.53 |
| PA2461_at      | 9.08   | 16.50  | 0.151 | -1.82 |
| PA2462_at      | 151.72 | 142.23 | 0.151 | 1.07  |
| PA2464_at      | 329.84 | 267.55 | 0.024 | 1.23  |
| PA2465_at      | 12.32  | 3.90   | 0.024 | 3.16  |
| PA2466_at      | 15.74  | 8.50   | 0.008 | 1.85  |
| PA2467_at      | 25.66  | 30.35  | 0.349 | -1.18 |
| PA2468_at      | 22.00  | 17.02  | 0.238 | 1.29  |
| PA2469_at      | 22.94  | 27.15  | 0.817 | -1.18 |
| PA2470_gtdA_at | 17.42  | 17.15  | 1.000 | 1.02  |
| PA2471_at      | 5.72   | 6.75   | 0.817 | -1.18 |
| PA2472_at      | 7.66   | 5.35   | 0.413 | 1.43  |
| PA2473_at      | 14.54  | 8.23   | 0.087 | 1.77  |
| PA2474_at      | 16.20  | 10.33  | 0.556 | 1.57  |
| PA2475_at      | 36.20  | 16.75  | 0.008 | 2.16  |
| PA2476_dsbG_at | 112.70 | 109.80 | 0.643 | 1.03  |
| PA2477_at      | 33.96  | 31.10  | 0.484 | 1.09  |
| PA2478_at      | 19.50  | 19.15  | 1.000 | 1.02  |
| PA2479_at      | 46.10  | 47.68  | 0.643 | -1.03 |
| PA2480_at      | 10.16  | 13.43  | 0.484 | -1.32 |
| PA2481_at      | 265.12 | 233.88 | 0.238 | 1.13  |
| PA2482_at      | 297.22 | 288.15 | 0.817 | 1.03  |
| PA2483_at      | 85.26  | 93.30  | 0.151 | -1.09 |
| PA2484_at      | 51.74  | 57.95  | 0.349 | -1.12 |
| PA2485_at      | 22.16  | 15.10  | 0.151 | 1.47  |
| PA2486_at      | 7.66   | 6.10   | 0.817 | 1.26  |
| PA2487_i_at    | 28.30  | 15.22  | 0.008 | 1.86  |
| PA2488_at      | 29.36  | 40.83  | 0.024 | -1.39 |
| PA2489_at      | 26.58  | 18.02  | 0.143 | 1.48  |
| PA2490_at      | 14.22  | 17.45  | 0.063 | -1.23 |
| PA2491_at      | 108.50 | 92.82  | 0.087 | 1.17  |
| PA2492_mexT_at | 94.08  | 87.40  | 0.484 | 1.08  |
| PA2493_mexE_at | 9.20   | 3.08   | 0.040 | 2.99  |
| PA2494_mexF_at | 7.20   | 10.85  | 0.151 | -1.51 |
| PA2495_oprN_at | 20.06  | 15.85  | 0.349 | 1.27  |
| PA2496_at      | 34.44  | 29.60  | 0.238 | 1.16  |
| PA2497_at      | 16.16  | 17.75  | 0.817 | -1.10 |
| PA2498_at      | 28.78  | 34.88  | 0.151 | -1.21 |
| PA2499_at      | 17.32  | 9.10   | 0.484 | 1.90  |
| PA2500_at      | 8.32   | 9.93   | 0.484 | -1.19 |
| PA2501_at      | 81.40  | 150.73 | 0.048 | -1.85 |
| PA2502_at      | 35.88  | 53.85  | 0.008 | -1.50 |
| PA2503_at      | 157.66 | 142.55 | 0.349 | 1.11  |

## Supplementary Table 1. Probe set signal data for experimental and control samples

|                |        |        |       |       |
|----------------|--------|--------|-------|-------|
| PA2504_at      | 24.12  | 27.42  | 0.111 | -1.14 |
| PA2505_at      | 15.64  | 11.97  | 0.238 | 1.31  |
| PA2506_at      | 23.72  | 23.98  | 0.476 | -1.01 |
| PA2507_catA_at | 14.88  | 13.90  | 0.484 | 1.07  |
| PA2508_catC_at | 16.14  | 13.70  | 0.817 | 1.18  |
| PA2509_catB_at | 10.48  | 2.57   | 0.048 | 4.08  |
| PA2510_catR_at | 55.70  | 45.42  | 0.024 | 1.23  |
| PA2511_at      | 14.36  | 13.77  | 0.817 | 1.04  |
| PA2512_antA_at | 7.46   | 3.38   | 0.087 | 2.21  |
| PA2513_antB_at | 14.68  | 14.80  | 0.817 | -1.01 |
| PA2514_antC_at | 8.30   | 10.90  | 0.349 | -1.31 |
| PA2515_xylL_at | 4.36   | 6.63   | 0.238 | -1.52 |
| PA2516_xylZ_at | 5.58   | 4.38   | 0.643 | 1.27  |
| PA2517_xylY_at | 22.40  | 11.10  | 0.008 | 2.02  |
| PA2518_xylX_at | 1.54   | 2.75   | 0.484 | -1.79 |
| PA2519_xylS_at | 20.38  | 13.27  | 0.087 | 1.54  |
| PA2520_czcA_at | 11.46  | 16.73  | 0.238 | -1.46 |
| PA2521_czcB_at | 27.96  | 21.92  | 0.643 | 1.28  |
| PA2522_czcC_at | 3.28   | 2.67   | 0.817 | 1.23  |
| PA2523_at      | 59.30  | 29.88  | 0.048 | 1.98  |
| PA2524_at      | 45.72  | 32.53  | 0.151 | 1.41  |
| PA2525_at      | 63.90  | 50.83  | 0.238 | 1.26  |
| PA2526_at      | 53.32  | 36.00  | 0.008 | 1.48  |
| PA2527_at      | 46.24  | 36.72  | 0.238 | 1.26  |
| PA2528_at      | 113.06 | 74.42  | 0.008 | 1.52  |
| PA2529_at      | 143.96 | 88.30  | 0.008 | 1.63  |
| PA2530_at      | 143.90 | 112.98 | 0.048 | 1.27  |
| PA2531_at      | 15.20  | 23.30  | 0.151 | -1.53 |
| PA2532_tpx_at  | 264.32 | 231.20 | 0.484 | 1.14  |
| PA2533_at      | 265.58 | 186.95 | 0.024 | 1.42  |
| PA2534_at      | 12.92  | 19.45  | 0.238 | -1.51 |
| PA2535_at      | 27.94  | 25.15  | 0.817 | 1.11  |
| PA2536_at      | 71.20  | 92.28  | 0.151 | -1.30 |
| PA2537_at      | 156.70 | 199.52 | 0.048 | -1.27 |
| PA2538_at      | 168.14 | 146.15 | 0.349 | 1.15  |
| PA2539_at      | 61.68  | 49.82  | 0.484 | 1.24  |
| PA2540_at      | 205.26 | 170.80 | 0.643 | 1.20  |
| PA2541_at      | 120.90 | 147.65 | 0.048 | -1.22 |
| PA2542_at      | 35.00  | 30.77  | 0.151 | 1.14  |
| PA2543_at      | 49.90  | 43.70  | 0.643 | 1.14  |
| PA2544_at      | 29.94  | 20.05  | 0.008 | 1.49  |
| PA2545_xthA_at | 250.54 | 258.33 | 0.349 | -1.03 |
| PA2546_at      | 3.28   | 20.78  | 0.008 | -6.34 |
| PA2547_at      | 20.82  | 22.55  | 0.817 | -1.08 |
| PA2548_at      | 5.68   | 8.90   | 0.151 | -1.57 |
| PA2549_at      | 35.08  | 25.92  | 0.238 | 1.35  |
| PA2550_at      | 21.44  | 19.00  | 0.484 | 1.13  |
| PA2551_at      | 148.08 | 86.30  | 0.008 | 1.72  |
| PA2552_at      | 350.40 | 155.27 | 0.008 | 2.26  |
| PA2553_at      | 442.80 | 181.02 | 0.008 | 2.45  |
| PA2554_at      | 240.36 | 139.22 | 0.008 | 1.73  |

### Supplementary Table 1. Probe set signal data for experimental and control samples

|                |        |        |       |       |
|----------------|--------|--------|-------|-------|
| PA2555_at      | 69.66  | 31.35  | 0.008 | 2.22  |
| PA2556_at      | 37.76  | 43.10  | 0.087 | -1.14 |
| PA2557_at      | 114.38 | 58.05  | 0.048 | 1.97  |
| PA2558_at      | 29.14  | 30.38  | 0.817 | -1.04 |
| PA2559_at      | 144.88 | 107.95 | 0.008 | 1.34  |
| PA2560_at      | 30.42  | 40.05  | 0.349 | -1.32 |
| PA2561_at      | 50.82  | 41.65  | 0.238 | 1.22  |
| PA2562_at      | 54.64  | 57.03  | 1.000 | -1.04 |
| PA2563_at      | 9.60   | 12.50  | 0.349 | -1.30 |
| PA2564_at      | 11.92  | 7.65   | 0.349 | 1.56  |
| PA2565_at      | 46.70  | 40.13  | 0.643 | 1.16  |
| PA2566_at      | 5.50   | 9.40   | 0.111 | -1.71 |
| PA2567_at      | 56.58  | 46.10  | 0.048 | 1.23  |
| PA2568_at      | 36.90  | 31.92  | 0.349 | 1.16  |
| PA2569_at      | 38.76  | 20.78  | 0.008 | 1.87  |
| PA2570_pa1L_at | 16.14  | 8.05   | 0.151 | 2.00  |
| PA2571_at      | 3.70   | 2.95   | 0.484 | 1.25  |
| PA2572_at      | 18.16  | 20.72  | 0.484 | -1.14 |
| PA2573_at      | 12.80  | 12.47  | 0.817 | 1.03  |
| PA2574_at      | 7.72   | 9.58   | 0.349 | -1.24 |
| PA2575_at      | 337.64 | 232.82 | 0.008 | 1.45  |
| PA2576_at      | 25.48  | 27.38  | 0.817 | -1.07 |
| PA2577_at      | 32.88  | 38.90  | 0.349 | -1.18 |
| PA2578_at      | 36.86  | 15.48  | 0.008 | 2.38  |
| PA2579_at      | 197.40 | 386.00 | 0.008 | -1.96 |
| PA2580_at      | 18.44  | 25.77  | 0.151 | -1.40 |
| PA2581_at      | 139.32 | 152.95 | 0.349 | -1.10 |
| PA2582_at      | 195.62 | 342.42 | 0.048 | -1.75 |
| PA2583_at      | 54.28  | 42.40  | 0.349 | 1.28  |
| PA2584_pgsA_at | 193.34 | 242.95 | 0.087 | -1.26 |
| PA2585_uvrC_at | 63.52  | 90.90  | 0.008 | -1.43 |
| PA2586_gacA_at | 350.04 | 345.55 | 0.817 | 1.01  |
| PA2587_at      | 95.18  | 134.02 | 0.008 | -1.41 |
| PA2588_at      | 32.34  | 34.22  | 1.000 | -1.06 |
| PA2589_at      | 17.22  | 17.95  | 0.635 | -1.04 |
| PA2590_at      | 9.54   | 15.70  | 0.143 | -1.65 |
| PA2591_at      | 34.04  | 62.02  | 0.024 | -1.82 |
| PA2592_at      | 69.34  | 111.50 | 0.008 | -1.61 |
| PA2593_at      | 19.74  | 34.05  | 0.008 | -1.72 |
| PA2594_at      | 20.26  | 22.30  | 0.484 | -1.10 |
| PA2595_at      | 5.60   | 32.95  | 0.008 | -5.88 |
| PA2596_at      | 5.56   | 12.43  | 0.024 | -2.24 |
| PA2597_at      | 51.28  | 68.20  | 0.349 | -1.33 |
| PA2598_at      | 26.64  | 25.08  | 0.817 | 1.06  |
| PA2599_at      | 27.58  | 22.28  | 0.087 | 1.24  |
| PA2600_at      | 26.34  | 12.63  | 0.008 | 2.09  |
| PA2601_at      | 52.60  | 41.52  | 0.063 | 1.27  |
| PA2602_at      | 15.34  | 15.43  | 0.817 | -1.01 |
| PA2603_at      | 21.90  | 29.88  | 0.143 | -1.36 |
| PA2604_at      | 473.56 | 341.47 | 0.048 | 1.39  |
| PA2605_at      | 85.10  | 85.13  | 0.817 | -1.00 |

### Supplementary Table 1. Probe set signal data for experimental and control samples

|                 |         |         |       |       |
|-----------------|---------|---------|-------|-------|
| PA2606_at       | 157.88  | 189.98  | 0.024 | -1.20 |
| PA2607_at       | 68.70   | 96.50   | 0.048 | -1.40 |
| PA2608_at       | 88.82   | 98.47   | 0.413 | -1.11 |
| PA2609_at       | 78.98   | 51.75   | 0.008 | 1.53  |
| PA2610_at       | 21.42   | 14.10   | 0.151 | 1.52  |
| PA2611_cysG_at  | 100.54  | 106.52  | 0.349 | -1.06 |
| PA2612_serS_at  | 841.62  | 779.65  | 0.087 | 1.08  |
| PA2613_at       | 162.28  | 170.45  | 0.643 | -1.05 |
| PA2614_lolA_at  | 278.96  | 354.10  | 0.008 | -1.27 |
| PA2615_ftsK_at  | 226.58  | 243.85  | 0.484 | -1.08 |
| PA2616_trxB1_at | 696.80  | 774.72  | 0.349 | -1.11 |
| PA2617_aat_at   | 115.86  | 104.40  | 0.048 | 1.11  |
| PA2618_at       | 34.78   | 35.58   | 1.000 | -1.02 |
| PA2619_infA_at  | 280.62  | 767.30  | 0.008 | -2.73 |
| PA2620_clpA_at  | 381.68  | 294.23  | 0.008 | 1.30  |
| PA2621_at       | 164.84  | 250.15  | 0.008 | -1.52 |
| PA2622_cspD_at  | 137.38  | 169.47  | 0.238 | -1.23 |
| PA2623_icd_at   | 1324.26 | 1188.75 | 0.349 | 1.11  |
| PA2624_idh_at   | 2521.12 | 2040.95 | 0.008 | 1.24  |
| PA2625_at       | 163.36  | 188.45  | 0.238 | -1.15 |
| PA2626_trmU_at  | 565.28  | 549.43  | 0.643 | 1.03  |
| PA2627_at       | 349.94  | 367.48  | 0.643 | -1.05 |
| PA2628_at       | 36.24   | 48.73   | 0.024 | -1.34 |
| PA2629_purB_at  | 606.96  | 922.92  | 0.008 | -1.52 |
| PA2630_at       | 88.66   | 213.63  | 0.008 | -2.41 |
| PA2631_at       | 215.04  | 248.75  | 0.484 | -1.16 |
| PA2632_at       | 72.34   | 72.65   | 0.730 | -1.00 |
| PA2633_at       | 69.54   | 62.72   | 0.349 | 1.11  |
| PA2634_at       | 460.14  | 396.80  | 0.349 | 1.16  |
| PA2635_at       | 26.30   | 19.00   | 0.238 | 1.38  |
| PA2636_at       | 17.18   | 21.85   | 0.349 | -1.27 |
| PA2637_nuoA_at  | 264.42  | 480.88  | 0.008 | -1.82 |
| PA2638_nuoB_at  | 716.56  | 836.40  | 0.151 | -1.17 |
| PA2639_nuoD_at  | 792.90  | 932.18  | 0.087 | -1.18 |
| PA2640_nuoE_at  | 1424.52 | 1259.20 | 0.008 | 1.13  |
| PA2641_nuoF_at  | 690.92  | 793.73  | 0.151 | -1.15 |
| PA2642_nuoG_at  | 1079.96 | 984.15  | 0.151 | 1.10  |
| PA2643_nuoH_at  | 922.28  | 846.42  | 1.000 | 1.09  |
| PA2644_nuoI_at  | 715.96  | 662.90  | 0.817 | 1.08  |
| PA2645_nuoJ_at  | 533.72  | 653.78  | 0.087 | -1.22 |
| PA2646_nuoK_at  | 941.70  | 1019.75 | 0.238 | -1.08 |
| PA2647_nuoL_at  | 536.20  | 548.10  | 1.000 | -1.02 |
| PA2648_nuoM_at  | 531.08  | 547.92  | 0.484 | -1.03 |
| PA2649_nuoN_at  | 368.66  | 348.82  | 1.000 | 1.06  |
| PA2650_at       | 67.22   | 52.72   | 0.048 | 1.28  |
| PA2651_at       | 63.84   | 67.60   | 0.349 | -1.06 |
| PA2652_at       | 118.70  | 181.43  | 0.008 | -1.53 |
| PA2653_at       | 55.80   | 130.32  | 0.008 | -2.34 |
| PA2654_at       | 167.32  | 130.50  | 0.048 | 1.28  |
| PA2655_i_at     | 2.74    | 5.53    | 0.087 | -2.02 |
| PA2656_at       | 42.26   | 36.42   | 0.048 | 1.16  |

**Supplementary Table 1. Probe set signal data for experimental and control samples**

|                |        |        |       |       |
|----------------|--------|--------|-------|-------|
| PA2657_at      | 96.68  | 94.63  | 0.476 | 1.02  |
| PA2658_at      | 161.48 | 169.05 | 0.484 | -1.05 |
| PA2659_at      | 135.90 | 148.27 | 0.238 | -1.09 |
| PA2660_at      | 187.26 | 155.88 | 0.087 | 1.20  |
| PA2661_at      | 97.90  | 87.77  | 0.484 | 1.12  |
| PA2662_at      | 11.46  | 15.82  | 0.349 | -1.38 |
| PA2663_at      | 12.42  | 7.98   | 0.048 | 1.56  |
| PA2664_fhp_at  | 2.48   | 2.05   | 0.905 | 1.21  |
| PA2665_at      | 55.18  | 48.48  | 0.151 | 1.14  |
| PA2666_at      | 117.26 | 168.52 | 0.087 | -1.44 |
| PA2667_at      | 160.48 | 480.75 | 0.008 | -3.00 |
| PA2668_at      | 19.30  | 16.05  | 0.349 | 1.20  |
| PA2669_at      | 8.38   | 6.83   | 0.484 | 1.23  |
| PA2670_at      | 6.00   | 2.10   | 0.048 | 2.86  |
| PA2671_at      | 11.88  | 10.75  | 0.413 | 1.11  |
| PA2672_at      | 2.68   | 15.55  | 0.008 | -5.80 |
| PA2673_at      | 5.08   | 5.78   | 0.643 | -1.14 |
| PA2674_at      | 15.22  | 14.77  | 0.730 | 1.03  |
| PA2675_at      | 11.16  | 18.10  | 0.151 | -1.62 |
| PA2676_at      | 13.18  | 8.77   | 0.286 | 1.50  |
| PA2677_at      | 6.24   | 5.28   | 0.730 | 1.18  |
| PA2678_at      | 4.78   | 11.32  | 0.024 | -2.37 |
| PA2679_at      | 22.08  | 21.77  | 0.817 | 1.01  |
| PA2680_at      | 6.58   | 10.25  | 0.349 | -1.56 |
| PA2681_at      | 7.90   | 13.70  | 0.151 | -1.73 |
| PA2682_at      | 30.10  | 53.17  | 0.024 | -1.77 |
| PA2683_at      | 55.92  | 67.70  | 0.087 | -1.21 |
| PA2684_at      | 203.34 | 164.27 | 0.048 | 1.24  |
| PA2685_at      | 179.12 | 157.07 | 1.000 | 1.14  |
| PA2686_pfeR_at | 17.82  | 20.42  | 0.484 | -1.15 |
| PA2687_pfeS_at | 16.80  | 15.77  | 0.905 | 1.07  |
| PA2688_pfeA_at | 14.16  | 6.85   | 0.151 | 2.07  |
| PA2689_at      | 2.66   | 7.50   | 0.349 | -2.82 |
| PA2691_at      | 19.44  | 26.68  | 0.087 | -1.37 |
| PA2692_at      | 80.46  | 95.20  | 0.087 | -1.18 |
| PA2693_at      | 24.78  | 21.58  | 0.238 | 1.15  |
| PA2694_at      | 12.38  | 19.65  | 0.087 | -1.59 |
| PA2695_at      | 48.78  | 52.60  | 0.484 | -1.08 |
| PA2696_at      | 15.40  | 13.93  | 0.556 | 1.11  |
| PA2697_at      | 9.54   | 13.55  | 0.190 | -1.42 |
| PA2698_at      | 34.96  | 29.48  | 0.190 | 1.19  |
| PA2699_at      | 18.42  | 10.48  | 0.048 | 1.76  |
| PA2700_at      | 7.24   | 14.13  | 0.151 | -1.95 |
| PA2701_at      | 8.38   | 9.17   | 1.000 | -1.09 |
| PA2702_at      | 171.02 | 131.50 | 0.048 | 1.30  |
| PA2703_at      | 66.68  | 66.90  | 1.000 | -1.00 |
| PA2704_at      | 12.02  | 15.60  | 0.238 | -1.30 |
| PA2705_at      | 38.88  | 51.52  | 0.087 | -1.33 |
| PA2706_at      | 115.30 | 132.27 | 0.008 | -1.15 |
| PA2707_at      | 150.92 | 139.30 | 0.643 | 1.08  |
| PA2708_at      | 26.62  | 15.27  | 0.008 | 1.74  |

### Supplementary Table 1. Probe set signal data for experimental and control samples

|                |         |         |       |       |
|----------------|---------|---------|-------|-------|
| PA2709_cysK_at | 345.22  | 235.10  | 0.008 | 1.47  |
| PA2710_at      | 42.78   | 48.00   | 0.341 | -1.12 |
| PA2711_at      | 57.14   | 43.75   | 0.151 | 1.31  |
| PA2712_at      | 28.10   | 31.35   | 0.349 | -1.12 |
| PA2713_at      | 30.40   | 23.17   | 0.087 | 1.31  |
| PA2714_at      | 17.22   | 23.25   | 0.087 | -1.35 |
| PA2715_at      | 12.76   | 5.88    | 0.008 | 2.17  |
| PA2716_at      | 7.88    | 5.13    | 0.484 | 1.54  |
| PA2717_cpo_at  | 11.68   | 11.63   | 0.643 | 1.00  |
| PA2718_at      | 54.72   | 47.47   | 0.349 | 1.15  |
| PA2719_at      | 9.30    | 3.83    | 0.008 | 2.43  |
| PA2720_at      | 43.96   | 48.17   | 0.349 | -1.10 |
| PA2721_at      | 8.76    | 6.28    | 0.286 | 1.39  |
| PA2722_at      | 13.16   | 10.98   | 0.349 | 1.20  |
| PA2723_at      | 69.82   | 60.65   | 0.151 | 1.15  |
| PA2724_r_at    | 78.02   | 70.82   | 0.730 | 1.10  |
| PA2725_at      | 149.24  | 111.78  | 0.087 | 1.34  |
| PA2726_at      | 123.78  | 76.13   | 0.008 | 1.63  |
| PA2727_at      | 147.06  | 103.13  | 0.008 | 1.43  |
| PA2728_at      | 159.30  | 120.38  | 0.151 | 1.32  |
| PA2729_at      | 173.34  | 98.57   | 0.008 | 1.76  |
| PA2730_at      | 69.18   | 153.40  | 0.008 | -2.22 |
| PA2731_at      | 100.54  | 194.85  | 0.008 | -1.94 |
| PA2732_at      | 118.44  | 157.57  | 0.048 | -1.33 |
| PA2733_at      | 301.44  | 345.13  | 0.008 | -1.14 |
| PA2734_at      | 163.22  | 237.13  | 0.008 | -1.45 |
| PA2735_at      | 271.26  | 420.78  | 0.008 | -1.55 |
| PA2736_at      | 247.90  | 372.33  | 0.008 | -1.50 |
| PA2737_at      | 541.68  | 482.83  | 0.238 | 1.12  |
| PA2738_himA_at | 863.04  | 829.03  | 0.484 | 1.04  |
| PA2739_pheT_at | 454.64  | 561.45  | 0.048 | -1.23 |
| PA2740_pheS_at | 604.48  | 829.45  | 0.008 | -1.37 |
| PA2741_rplT_at | 688.82  | 1130.90 | 0.008 | -1.64 |
| PA2742_rpml_at | 2963.10 | 3700.15 | 0.024 | -1.25 |
| PA2743_infC_at | 2375.80 | 2891.90 | 0.024 | -1.22 |
| PA2744_thrS_at | 766.20  | 842.47  | 0.349 | -1.10 |
| PA2745_at      | 32.04   | 50.68   | 0.008 | -1.58 |
| PA2746_at      | 5.18    | 3.17    | 0.190 | 1.63  |
| PA2747_at      | 41.70   | 26.45   | 0.008 | 1.58  |
| PA2748_at      | 31.32   | 35.77   | 0.349 | -1.14 |
| PA2749_endA_at | 68.14   | 90.80   | 0.008 | -1.33 |
| PA2750_at      | 59.52   | 54.85   | 0.349 | 1.09  |
| PA2751_at      | 13.14   | 19.92   | 0.048 | -1.52 |
| PA2752_at      | 20.28   | 11.67   | 0.048 | 1.74  |
| PA2753_at      | 12.58   | 20.00   | 0.238 | -1.59 |
| PA2754_at      | 31.40   | 43.75   | 0.151 | -1.39 |
| PA2755_eco_at  | 329.00  | 403.15  | 0.151 | -1.23 |
| PA2756_at      | 52.08   | 54.80   | 0.643 | -1.05 |
| PA2757_at      | 130.20  | 120.72  | 0.238 | 1.08  |
| PA2758_at      | 29.94   | 25.48   | 0.087 | 1.18  |
| PA2759_at      | 4.52    | 7.07    | 0.151 | -1.56 |

### Supplementary Table 1. Probe set signal data for experimental and control samples

|                |         |         |       |       |
|----------------|---------|---------|-------|-------|
| PA2760_at      | 1662.74 | 2565.07 | 0.024 | -1.54 |
| PA2761_at      | 216.10  | 227.88  | 0.643 | -1.05 |
| PA2762_at      | 28.40   | 22.65   | 0.238 | 1.25  |
| PA2763_at      | 12.44   | 16.52   | 0.349 | -1.33 |
| PA2764_at      | 33.54   | 24.22   | 0.151 | 1.38  |
| PA2765_at      | 327.28  | 347.33  | 0.349 | -1.06 |
| PA2766_at      | 24.60   | 21.80   | 0.643 | 1.13  |
| PA2767_at      | 10.42   | 14.25   | 0.238 | -1.37 |
| PA2768_at      | 13.44   | 14.68   | 0.643 | -1.09 |
| PA2769_at      | 63.70   | 72.13   | 0.238 | -1.13 |
| PA2770_at      | 205.86  | 281.05  | 0.008 | -1.37 |
| PA2771_at      | 20.12   | 14.28   | 0.087 | 1.41  |
| PA2772_at      | 26.70   | 37.45   | 0.048 | -1.40 |
| PA2773_at      | 29.02   | 27.65   | 0.643 | 1.05  |
| PA2774_at      | 97.56   | 134.68  | 0.008 | -1.38 |
| PA2775_at      | 82.10   | 107.73  | 0.151 | -1.31 |
| PA2776_at      | 130.26  | 109.85  | 0.024 | 1.19  |
| PA2777_at      | 21.90   | 17.20   | 0.238 | 1.27  |
| PA2778_at      | 41.82   | 23.60   | 0.024 | 1.77  |
| PA2779_at      | 70.30   | 64.28   | 0.817 | 1.09  |
| PA2780_at      | 42.56   | 45.50   | 0.484 | -1.07 |
| PA2781_at      | 47.50   | 39.58   | 0.151 | 1.20  |
| PA2782_at      | 22.48   | 24.38   | 0.643 | -1.08 |
| PA2783_at      | 15.36   | 27.08   | 0.111 | -1.76 |
| PA2784_at      | 25.00   | 30.38   | 0.087 | -1.22 |
| PA2785_at      | 6.24    | 15.45   | 0.008 | -2.48 |
| PA2786_at      | 22.20   | 17.02   | 0.643 | 1.30  |
| PA2787_cpg2_at | 13.70   | 3.80    | 0.008 | 3.61  |
| PA2788_at      | 53.28   | 47.92   | 0.413 | 1.11  |
| PA2789_at      | 23.88   | 22.77   | 0.643 | 1.05  |
| PA2790_at      | 29.86   | 23.25   | 0.063 | 1.28  |
| PA2791_at      | 17.04   | 18.50   | 0.643 | -1.09 |
| PA2792_at      | 44.26   | 62.07   | 0.008 | -1.40 |
| PA2793_at      | 126.54  | 129.05  | 1.000 | -1.02 |
| PA2794_at      | 15.80   | 10.25   | 0.048 | 1.54  |
| PA2795_at      | 55.20   | 44.45   | 0.143 | 1.24  |
| PA2796_tal_at  | 187.60  | 138.63  | 0.151 | 1.35  |
| PA2797_at      | 88.56   | 71.53   | 0.151 | 1.24  |
| PA2798_at      | 267.48  | 345.58  | 0.024 | -1.29 |
| PA2799_at      | 14.90   | 24.25   | 0.024 | -1.63 |
| PA2800_at      | 526.66  | 680.45  | 0.024 | -1.29 |
| PA2801_at      | 80.72   | 103.15  | 0.048 | -1.28 |
| PA2802_at      | 95.82   | 119.45  | 0.008 | -1.25 |
| PA2803_at      | 7.06    | 8.55    | 0.484 | -1.21 |
| PA2804_at      | 16.38   | 4.18    | 0.008 | 3.92  |
| PA2805_at      | 88.36   | 154.45  | 0.024 | -1.75 |
| PA2806_at      | 28.58   | 33.65   | 0.238 | -1.18 |
| PA2807_at      | 2.48    | 2.00    | 0.905 | 1.24  |
| PA2808_i_at    | 20.80   | 14.95   | 0.349 | 1.39  |
| PA2809_at      | 23.16   | 27.38   | 0.349 | -1.18 |
| PA2810_at      | 16.72   | 25.82   | 0.024 | -1.54 |

**Supplementary Table 1. Probe set signal data for experimental and control samples**

|                |         |         |       |       |
|----------------|---------|---------|-------|-------|
| PA2811_at      | 49.58   | 74.32   | 0.008 | -1.50 |
| PA2812_at      | 206.92  | 257.10  | 0.087 | -1.24 |
| PA2813_at      | 118.70  | 106.00  | 0.151 | 1.12  |
| PA2814_at      | 10.38   | 10.02   | 0.643 | 1.04  |
| PA2815_at      | 24.38   | 27.70   | 0.349 | -1.14 |
| PA2816_i_at    | 25.38   | 25.40   | 0.817 | -1.00 |
| PA2817_at      | 125.10  | 186.65  | 0.024 | -1.49 |
| PA2818_at      | 57.88   | 35.05   | 0.087 | 1.65  |
| PA2819_at      | 16.56   | 6.75    | 0.024 | 2.45  |
| PA2820_at      | 66.64   | 90.55   | 0.048 | -1.36 |
| PA2821_at      | 51.94   | 36.88   | 0.048 | 1.41  |
| PA2822_at      | 43.60   | 49.57   | 0.151 | -1.14 |
| PA2823_at      | 205.64  | 214.38  | 0.484 | -1.04 |
| PA2824_at      | 39.12   | 27.75   | 0.087 | 1.41  |
| PA2825_at      | 31.22   | 24.92   | 0.349 | 1.25  |
| PA2826_at      | 87.44   | 77.40   | 0.190 | 1.13  |
| PA2827_at      | 107.78  | 90.35   | 0.008 | 1.19  |
| PA2828_at      | 232.22  | 263.88  | 0.048 | -1.14 |
| PA2829_at      | 62.46   | 73.77   | 0.238 | -1.18 |
| PA2830_htpX_at | 603.96  | 393.88  | 0.024 | 1.53  |
| PA2831_at      | 115.72  | 118.40  | 0.817 | -1.02 |
| PA2832_tpm_at  | 26.10   | 29.67   | 0.151 | -1.14 |
| PA2833_i_at    | 18.66   | 13.65   | 0.238 | 1.37  |
| PA2834_at      | 19.56   | 30.05   | 0.087 | -1.54 |
| PA2835_at      | 8.88    | 11.20   | 0.238 | -1.26 |
| PA2836_at      | 9.78    | 9.48    | 0.817 | 1.03  |
| PA2837_at      | 22.86   | 17.58   | 0.349 | 1.30  |
| PA2838_at      | 7.64    | 11.52   | 0.143 | -1.51 |
| PA2839_at      | 29.24   | 20.35   | 0.024 | 1.44  |
| PA2840_at      | 331.64  | 309.30  | 0.643 | 1.07  |
| PA2841_at      | 44.30   | 23.25   | 0.008 | 1.91  |
| PA2842_at      | 34.94   | 32.70   | 0.817 | 1.07  |
| PA2843_at      | 219.84  | 160.57  | 0.048 | 1.37  |
| PA2844_at      | 12.00   | 9.27    | 0.484 | 1.29  |
| PA2845_at      | 16.78   | 9.77    | 0.024 | 1.72  |
| PA2846_at      | 22.92   | 23.60   | 0.817 | -1.03 |
| PA2847_at      | 8.10    | 3.55    | 0.024 | 2.28  |
| PA2848_at      | 26.66   | 38.95   | 0.008 | -1.46 |
| PA2849_at      | 49.74   | 92.65   | 0.008 | -1.86 |
| PA2850_ohr_at  | 81.80   | 111.70  | 0.151 | -1.37 |
| PA2851_efp_at  | 773.10  | 1357.25 | 0.008 | -1.76 |
| PA2852_at      | 34.82   | 38.53   | 0.643 | -1.11 |
| PA2853_oprl_at | 1934.72 | 3002.38 | 0.024 | -1.55 |
| PA2854_at      | 207.86  | 323.48  | 0.008 | -1.56 |
| PA2855_at      | 128.88  | 155.57  | 0.087 | -1.21 |
| PA2856_tesA_at | 64.68   | 58.38   | 0.484 | 1.11  |
| PA2857_at      | 78.22   | 71.20   | 0.151 | 1.10  |
| PA2858_at      | 111.98  | 78.95   | 0.008 | 1.42  |
| PA2859_greB_at | 53.18   | 64.20   | 0.048 | -1.21 |
| PA2860_at      | 49.32   | 49.70   | 1.000 | -1.01 |
| PA2861_ligT_at | 12.18   | 5.78    | 0.286 | 2.11  |



## Supplementary Table 1. Probe set signal data for experimental and control samples

|                |        |        |       |       |
|----------------|--------|--------|-------|-------|
| PA2862_lipA_at | 65.74  | 37.70  | 0.048 | 1.74  |
| PA2863_lipH_at | 2.92   | 10.95  | 0.008 | -3.75 |
| PA2864_at      | 14.94  | 40.55  | 0.008 | -2.71 |
| PA2865_at      | 47.96  | 49.17  | 0.817 | -1.03 |
| PA2866_mttC_at | 167.66 | 171.48 | 1.000 | -1.02 |
| PA2867_at      | 407.88 | 291.90 | 0.024 | 1.40  |
| PA2868_i_at    | 49.98  | 40.80  | 0.024 | 1.23  |
| PA2869_at      | 7.26   | 13.57  | 0.087 | -1.87 |
| PA2870_at      | 21.14  | 18.58  | 0.484 | 1.14  |
| PA2871_at      | 58.42  | 52.22  | 0.349 | 1.12  |
| PA2872_at      | 41.30  | 34.50  | 0.151 | 1.20  |
| PA2873_at      | 20.44  | 9.25   | 0.008 | 2.21  |
| PA2874_at      | 46.80  | 27.03  | 0.008 | 1.73  |
| PA2875_at      | 68.40  | 52.63  | 0.008 | 1.30  |
| PA2876_pyrF_at | 164.80 | 204.60 | 0.151 | -1.24 |
| PA2877_at      | 61.94  | 49.25  | 0.048 | 1.26  |
| PA2878_at      | 13.44  | 15.15  | 1.000 | -1.13 |
| PA2879_at      | 48.54  | 53.45  | 0.349 | -1.10 |
| PA2880_at      | 11.56  | 18.58  | 0.151 | -1.61 |
| PA2881_at      | 10.24  | 16.88  | 0.087 | -1.65 |
| PA2882_at      | 17.36  | 22.25  | 0.087 | -1.28 |
| PA2883_at      | 41.92  | 33.20  | 0.151 | 1.26  |
| PA2884_at      | 64.10  | 54.40  | 0.238 | 1.18  |
| PA2885_at      | 49.78  | 59.82  | 0.008 | -1.20 |
| PA2886_at      | 34.20  | 34.42  | 0.643 | -1.01 |
| PA2887_at      | 34.40  | 33.90  | 1.000 | 1.01  |
| PA2888_at      | 40.28  | 36.05  | 0.151 | 1.12  |
| PA2889_at      | 43.04  | 35.40  | 0.008 | 1.22  |
| PA2890_at      | 36.00  | 37.52  | 0.817 | -1.04 |
| PA2891_at      | 18.08  | 12.95  | 0.484 | 1.40  |
| PA2892_at      | 33.88  | 26.10  | 0.238 | 1.30  |
| PA2893_at      | 23.08  | 34.53  | 0.087 | -1.50 |
| PA2894_at      | 102.02 | 97.33  | 0.817 | 1.05  |
| PA2895_at      | 61.54  | 53.45  | 0.087 | 1.15  |
| PA2896_at      | 98.26  | 97.38  | 1.000 | 1.01  |
| PA2897_at      | 133.80 | 145.58 | 0.643 | -1.09 |
| PA2898_at      | 11.66  | 14.72  | 0.349 | -1.26 |
| PA2899_at      | 67.66  | 52.83  | 0.151 | 1.28  |
| PA2900_at      | 80.36  | 90.78  | 0.151 | -1.13 |
| PA2901_at      | 212.84 | 255.95 | 0.087 | -1.20 |
| PA2902_at      | 126.62 | 89.35  | 0.008 | 1.42  |
| PA2903_cobJ_at | 41.10  | 42.38  | 1.000 | -1.03 |
| PA2904_cobI_at | 83.96  | 121.43 | 0.008 | -1.45 |
| PA2905_cobH_at | 90.84  | 94.30  | 0.349 | -1.04 |
| PA2906_at      | 327.76 | 276.02 | 0.087 | 1.19  |
| PA2907_cobL_at | 158.10 | 112.72 | 0.008 | 1.40  |
| PA2908_cbiD_at | 109.58 | 92.18  | 0.151 | 1.19  |
| PA2909_i_at    | 40.56  | 26.80  | 0.151 | 1.51  |
| PA2910_at      | 19.12  | 13.18  | 0.238 | 1.45  |
| PA2911_at      | 35.66  | 84.30  | 0.008 | -2.36 |
| PA2912_at      | 59.36  | 65.38  | 0.643 | -1.10 |

**Supplementary Table 1. Probe set signal data for experimental and control samples**

|                |         |         |       |       |
|----------------|---------|---------|-------|-------|
| PA2913_at      | 31.62   | 32.88   | 0.484 | -1.04 |
| PA2914_at      | 24.84   | 25.22   | 0.992 | -1.02 |
| PA2915_at      | 86.00   | 55.50   | 0.008 | 1.55  |
| PA2916_at      | 24.92   | 14.85   | 0.151 | 1.68  |
| PA2917_at      | 42.48   | 22.13   | 0.008 | 1.92  |
| PA2918_at      | 63.16   | 59.05   | 0.643 | 1.07  |
| PA2919_at      | 6.34    | 2.15    | 0.087 | 2.95  |
| PA2920_at      | 33.88   | 20.25   | 0.087 | 1.67  |
| PA2921_at      | 52.24   | 57.33   | 0.484 | -1.10 |
| PA2922_at      | 14.16   | 16.92   | 0.817 | -1.19 |
| PA2923_hisJ_at | 20.76   | 16.60   | 0.484 | 1.25  |
| PA2924_hisQ_at | 6.96    | 6.75    | 1.000 | 1.03  |
| PA2925_hisM_at | 24.82   | 12.10   | 0.008 | 2.05  |
| PA2926_hisP_at | 3.36    | 7.07    | 0.087 | -2.10 |
| PA2927_at      | 19.78   | 8.50    | 0.008 | 2.33  |
| PA2928_at      | 36.18   | 34.10   | 1.000 | 1.06  |
| PA2929_at      | 20.44   | 16.28   | 0.151 | 1.26  |
| PA2930_at      | 32.68   | 41.92   | 0.151 | -1.28 |
| PA2931_at      | 38.04   | 37.35   | 0.643 | 1.02  |
| PA2932_morB_at | 36.98   | 42.17   | 0.238 | -1.14 |
| PA2933_at      | 15.50   | 19.75   | 0.349 | -1.27 |
| PA2934_at      | 21.30   | 19.92   | 0.349 | 1.07  |
| PA2935_at      | 6.34    | 2.45    | 0.151 | 2.59  |
| PA2936_at      | 12.98   | 13.60   | 0.817 | -1.05 |
| PA2937_at      | 7.24    | 7.77    | 0.643 | -1.07 |
| PA2938_at      | 11.30   | 12.72   | 0.643 | -1.13 |
| PA2939_at      | 14.88   | 8.63    | 0.008 | 1.72  |
| PA2940_at      | 8.44    | 16.15   | 0.151 | -1.91 |
| PA2941_at      | 36.52   | 25.70   | 0.151 | 1.42  |
| PA2942_at      | 148.26  | 147.23  | 0.643 | 1.01  |
| PA2943_at      | 85.10   | 74.45   | 0.484 | 1.14  |
| PA2944_cobN_at | 123.24  | 96.77   | 0.008 | 1.27  |
| PA2945_at      | 533.62  | 453.25  | 0.087 | 1.18  |
| PA2946_at      | 627.22  | 472.70  | 0.008 | 1.33  |
| PA2947_i_at    | 65.94   | 74.35   | 0.484 | -1.13 |
| PA2948_cobM_at | 75.36   | 65.05   | 0.484 | 1.16  |
| PA2949_at      | 34.00   | 40.25   | 0.643 | -1.18 |
| PA2950_at      | 431.22  | 655.35  | 0.008 | -1.52 |
| PA2951_etfA_at | 1624.76 | 1232.10 | 0.008 | 1.32  |
| PA2952_etfB_at | 2733.26 | 2256.30 | 0.008 | 1.21  |
| PA2953_at      | 441.08  | 611.63  | 0.008 | -1.39 |
| PA2954_at      | 34.80   | 39.03   | 0.349 | -1.12 |
| PA2955_at      | 33.94   | 44.90   | 0.048 | -1.32 |
| PA2956_at      | 48.72   | 53.20   | 0.484 | -1.09 |
| PA2957_at      | 291.86  | 561.58  | 0.008 | -1.92 |
| PA2958_at      | 28.54   | 25.95   | 0.643 | 1.10  |
| PA2959_at      | 244.22  | 241.90  | 1.000 | 1.01  |
| PA2960_pilZ_at | 113.90  | 211.60  | 0.008 | -1.86 |
| PA2961_holB_at | 145.88  | 142.35  | 0.643 | 1.02  |
| PA2962_tmk_at  | 213.82  | 220.07  | 0.643 | -1.03 |
| PA2963_at      | 120.10  | 126.15  | 0.349 | -1.05 |

## Supplementary Table 1. Probe set signal data for experimental and control samples

|                 |         |         |       |       |
|-----------------|---------|---------|-------|-------|
| PA2964_pabC_at  | 245.54  | 299.90  | 0.151 | -1.22 |
| PA2965_fabF1_at | 603.06  | 623.78  | 0.817 | -1.03 |
| PA2966_acpP_at  | 1035.40 | 1713.75 | 0.008 | -1.66 |
| PA2967_fabG_at  | 675.58  | 917.63  | 0.008 | -1.36 |
| PA2968_fabD_at  | 424.44  | 590.32  | 0.024 | -1.39 |
| PA2969_plsX_at  | 49.94   | 64.00   | 0.040 | -1.28 |
| PA2970_rpmF_at  | 632.26  | 1120.53 | 0.008 | -1.77 |
| PA2971_at       | 1539.56 | 1789.22 | 0.048 | -1.16 |
| PA2972_at       | 163.42  | 114.13  | 0.008 | 1.43  |
| PA2973_at       | 583.52  | 442.20  | 0.008 | 1.32  |
| PA2974_at       | 128.14  | 129.05  | 0.817 | -1.01 |
| PA2975_rluC_at  | 89.94   | 107.52  | 0.349 | -1.20 |
| PA2976_rne_at   | 2995.94 | 1906.15 | 0.008 | 1.57  |
| PA2977_murB_at  | 110.74  | 86.98   | 0.111 | 1.27  |
| PA2978_ptpA_at  | 128.64  | 162.68  | 0.008 | -1.26 |
| PA2979_kdsB_at  | 363.88  | 330.70  | 0.238 | 1.10  |
| PA2980_at       | 394.06  | 408.65  | 0.643 | -1.04 |
| PA2981_lpxK_at  | 64.70   | 50.65   | 0.048 | 1.28  |
| PA2982_at       | 85.58   | 102.13  | 0.087 | -1.19 |
| PA2983_at       | 279.48  | 243.05  | 0.048 | 1.15  |
| PA2984_at       | 19.06   | 18.70   | 0.817 | 1.02  |
| PA2985_at       | 101.98  | 77.10   | 0.008 | 1.32  |
| PA2986_at       | 53.36   | 87.90   | 0.008 | -1.65 |
| PA2987_at       | 181.20  | 187.17  | 0.817 | -1.03 |
| PA2988_at       | 77.82   | 77.55   | 0.643 | 1.00  |
| PA2989_at       | 55.44   | 44.50   | 0.151 | 1.25  |
| PA2990_at       | 136.16  | 110.45  | 0.008 | 1.23  |
| PA2991_sth_at   | 307.54  | 317.98  | 0.643 | -1.03 |
| PA2992_at       | 187.64  | 286.48  | 0.008 | -1.53 |
| PA2993_at       | 231.60  | 254.80  | 0.238 | -1.10 |
| PA2994_nqrF_at  | 329.48  | 389.08  | 0.024 | -1.18 |
| PA2995_nqrE_at  | 374.04  | 461.75  | 0.048 | -1.23 |
| PA2996_nqrD_at  | 501.54  | 544.38  | 0.238 | -1.09 |
| PA2997_nqrC_at  | 145.62  | 157.52  | 0.484 | -1.08 |
| PA2998_nqrB_at  | 330.62  | 399.22  | 0.024 | -1.21 |
| PA2999_nqrA_at  | 369.94  | 447.73  | 0.008 | -1.21 |
| PA3000_aroP1_at | 39.84   | 67.82   | 0.024 | -1.70 |
| PA3001_at       | 2118.48 | 2107.97 | 1.000 | 1.00  |
| PA3002_mfd_at   | 244.44  | 250.90  | 0.484 | -1.03 |
| PA3003_at       | 129.38  | 144.35  | 0.151 | -1.12 |
| PA3004_at       | 66.82   | 77.32   | 0.151 | -1.16 |
| PA3005_at       | 190.42  | 172.85  | 0.484 | 1.10  |
| PA3006_at       | 84.42   | 80.02   | 1.000 | 1.05  |
| PA3007_lexA_at  | 1267.90 | 320.93  | 0.008 | 3.95  |
| PA3008_at       | 618.58  | 109.23  | 0.008 | 5.66  |
| PA3009_at       | 75.32   | 233.80  | 0.008 | -3.10 |
| PA3010_at       | 128.06  | 153.73  | 0.024 | -1.20 |
| PA3011_topA_at  | 403.16  | 381.72  | 0.349 | 1.06  |
| PA3012_at       | 57.96   | 73.35   | 0.048 | -1.27 |
| PA3013_foaB_at  | 128.20  | 182.50  | 0.048 | -1.42 |
| PA3014_faoA_at  | 324.86  | 397.90  | 0.024 | -1.22 |

**Supplementary Table 1. Probe set signal data for experimental and control samples**

|                 |        |        |       |       |
|-----------------|--------|--------|-------|-------|
| PA3015_at       | 61.74  | 50.20  | 0.151 | 1.23  |
| PA3016_at       | 16.02  | 23.80  | 0.238 | -1.49 |
| PA3017_at       | 148.72 | 109.20 | 0.024 | 1.36  |
| PA3018_at       | 32.58  | 50.17  | 0.048 | -1.54 |
| PA3019_at       | 87.24  | 109.23 | 0.238 | -1.25 |
| PA3020_at       | 86.62  | 73.90  | 0.048 | 1.17  |
| PA3021_at       | 614.40 | 541.40 | 0.238 | 1.13  |
| PA3022_at       | 153.08 | 110.97 | 0.008 | 1.38  |
| PA3023_at       | 12.76  | 11.67  | 0.643 | 1.09  |
| PA3024_at       | 12.14  | 13.43  | 0.484 | -1.11 |
| PA3025_at       | 30.80  | 27.90  | 0.349 | 1.10  |
| PA3026_at       | 57.32  | 38.63  | 0.008 | 1.48  |
| PA3027_at       | 160.02 | 125.65 | 0.087 | 1.27  |
| PA3028_moeA2_at | 82.88  | 64.78  | 0.032 | 1.28  |
| PA3029_moaB2_at | 397.34 | 356.88 | 0.484 | 1.11  |
| PA3030_at       | 72.02  | 46.73  | 0.024 | 1.54  |
| PA3031_at       | 254.80 | 432.75 | 0.048 | -1.70 |
| PA3032_at       | 22.86  | 18.70  | 0.238 | 1.22  |
| PA3033_at       | 143.24 | 120.10 | 0.151 | 1.19  |
| PA3034_at       | 68.70  | 72.88  | 0.643 | -1.06 |
| PA3035_at       | 79.22  | 102.97 | 0.111 | -1.30 |
| PA3036_at       | 20.66  | 26.65  | 0.048 | -1.29 |
| PA3037_at       | 21.88  | 31.15  | 0.048 | -1.42 |
| PA3038_at       | 758.38 | 448.13 | 0.048 | 1.69  |
| PA3039_at       | 16.64  | 20.17  | 0.151 | -1.21 |
| PA3040_at       | 226.54 | 230.75 | 0.817 | -1.02 |
| PA3041_at       | 92.20  | 91.18  | 1.000 | 1.01  |
| PA3042_at       | 53.90  | 39.15  | 0.024 | 1.38  |
| PA3043_at       | 49.00  | 49.30  | 1.000 | -1.01 |
| PA3044_at       | 19.28  | 17.33  | 0.484 | 1.11  |
| PA3045_at       | 12.24  | 7.60   | 0.151 | 1.61  |
| PA3046_at       | 148.98 | 261.05 | 0.008 | -1.75 |
| PA3047_at       | 145.66 | 113.65 | 0.024 | 1.28  |
| PA3048_at       | 46.70  | 64.03  | 0.048 | -1.37 |
| PA3049_rmf_at   | 19.60  | 16.90  | 0.643 | 1.16  |
| PA3050_pyrD_at  | 254.00 | 351.50 | 0.008 | -1.38 |
| PA3051_at       | 14.30  | 30.20  | 0.048 | -2.11 |
| PA3052_at       | 164.36 | 86.60  | 0.008 | 1.90  |
| PA3053_at       | 71.88  | 64.30  | 0.238 | 1.12  |
| PA3054_at       | 61.76  | 69.57  | 0.349 | -1.13 |
| PA3055_at       | 172.46 | 165.58 | 0.817 | 1.04  |
| PA3056_at       | 76.46  | 70.80  | 0.817 | 1.08  |
| PA3057_at       | 17.36  | 12.77  | 0.024 | 1.36  |
| PA3058_at       | 12.96  | 20.13  | 0.413 | -1.55 |
| PA3059_at       | 20.66  | 26.88  | 0.238 | -1.30 |
| PA3060_at       | 13.34  | 23.75  | 0.087 | -1.78 |
| PA3061_at       | 16.24  | 28.63  | 0.048 | -1.76 |
| PA3062_at       | 13.58  | 17.38  | 0.730 | -1.28 |
| PA3063_at       | 12.58  | 15.70  | 0.484 | -1.25 |
| PA3064_at       | 6.60   | 1.85   | 0.008 | 3.57  |
| PA3065_at       | 11.28  | 8.45   | 0.413 | 1.33  |

**Supplementary Table 1. Probe set signal data for experimental and control samples**

|                 |         |         |       |       |
|-----------------|---------|---------|-------|-------|
| PA3066_at       | 12.48   | 22.00   | 0.048 | -1.76 |
| PA3067_at       | 38.94   | 31.52   | 0.087 | 1.24  |
| PA3068_at       | 2324.00 | 1466.85 | 0.008 | 1.58  |
| PA3069_at       | 44.84   | 30.20   | 0.024 | 1.48  |
| PA3070_at       | 187.22  | 173.93  | 0.238 | 1.08  |
| PA3071_at       | 173.36  | 143.73  | 0.087 | 1.21  |
| PA3072_at       | 68.78   | 91.20   | 0.024 | -1.33 |
| PA3073_at       | 37.70   | 35.85   | 0.484 | 1.05  |
| PA3074_at       | 47.18   | 43.85   | 0.817 | 1.08  |
| PA3075_at       | 29.34   | 32.55   | 0.349 | -1.11 |
| PA3076_at       | 66.76   | 52.72   | 0.024 | 1.27  |
| PA3077_at       | 58.90   | 72.28   | 0.349 | -1.23 |
| PA3078_at       | 37.60   | 53.43   | 0.008 | -1.42 |
| PA3079_at       | 49.84   | 47.58   | 0.484 | 1.05  |
| PA3080_at       | 205.76  | 77.63   | 0.008 | 2.65  |
| PA3081_at       | 299.42  | 243.40  | 0.048 | 1.23  |
| PA3082_at       | 243.98  | 351.60  | 0.024 | -1.44 |
| PA3083_pepN_at  | 94.92   | 140.60  | 0.008 | -1.48 |
| PA3084_at       | 167.58  | 171.20  | 0.817 | -1.02 |
| PA3085_at       | 138.48  | 167.45  | 0.087 | -1.21 |
| PA3086_at       | 29.34   | 43.03   | 0.008 | -1.47 |
| PA3087_at       | 47.40   | 51.23   | 0.817 | -1.08 |
| PA3088_at       | 156.80  | 180.73  | 0.087 | -1.15 |
| PA3089_at       | 34.76   | 22.88   | 0.048 | 1.52  |
| PA3090_at       | 17.12   | 7.30    | 0.008 | 2.35  |
| PA3091_at       | 54.92   | 37.55   | 0.087 | 1.46  |
| PA3092_fadH1_at | 38.90   | 49.33   | 0.151 | -1.27 |
| PA3093_at       | 143.60  | 117.45  | 0.151 | 1.22  |
| PA3094_at       | 61.72   | 64.85   | 0.556 | -1.05 |
| PA3095_xcpZ_at  | 44.84   | 37.65   | 1.000 | 1.19  |
| PA3096_xcpY_at  | 91.60   | 91.17   | 1.000 | 1.00  |
| PA3097_xcpX_at  | 47.60   | 54.58   | 0.238 | -1.15 |
| PA3098_xcpW_at  | 92.16   | 67.18   | 0.024 | 1.37  |
| PA3099_xcpV_at  | 110.58  | 80.92   | 0.024 | 1.37  |
| PA3100_xcpU_at  | 96.76   | 88.65   | 0.087 | 1.09  |
| PA3101_xcpT_at  | 218.24  | 217.82  | 0.817 | 1.00  |
| PA3102_xcpS_at  | 68.56   | 63.70   | 0.484 | 1.08  |
| PA3103_xcpR_at  | 138.16  | 109.85  | 0.024 | 1.26  |
| PA3104_xcpP_at  | 163.60  | 146.42  | 0.238 | 1.12  |
| PA3105_xcpQ_at  | 205.58  | 174.28  | 0.024 | 1.18  |
| PA3106_at       | 105.60  | 145.45  | 0.008 | -1.38 |
| PA3107_metZ_at  | 520.96  | 541.20  | 0.349 | -1.04 |
| PA3108_purF_at  | 543.52  | 523.00  | 0.817 | 1.04  |
| PA3109_at       | 85.34   | 95.30   | 0.643 | -1.12 |
| PA3110_at       | 246.28  | 331.05  | 0.008 | -1.34 |
| PA3111_folC_at  | 323.28  | 335.88  | 0.817 | -1.04 |
| PA3112_accD_at  | 321.24  | 342.42  | 0.484 | -1.07 |
| PA3113_trpF_at  | 372.24  | 302.72  | 0.008 | 1.23  |
| PA3114_truA_at  | 93.44   | 108.00  | 0.151 | -1.16 |
| PA3115_at       | 645.06  | 584.85  | 0.048 | 1.10  |
| PA3116_at       | 170.54  | 256.50  | 0.008 | -1.50 |

### Supplementary Table 1. Probe set signal data for experimental and control samples

|                  |         |         |       |       |
|------------------|---------|---------|-------|-------|
| PA3117_asd_at    | 241.18  | 267.73  | 0.349 | -1.11 |
| PA3118_leuB_at   | 122.36  | 133.50  | 0.817 | -1.09 |
| PA3119_at        | 54.52   | 49.20   | 0.238 | 1.11  |
| PA3120_leuD_at   | 54.76   | 51.28   | 1.000 | 1.07  |
| PA3121_leuC_at   | 56.52   | 50.83   | 0.349 | 1.11  |
| PA3122_at        | 25.68   | 29.60   | 0.151 | -1.15 |
| PA3123_at        | 112.64  | 97.43   | 0.349 | 1.16  |
| PA3124_at        | 61.16   | 60.28   | 0.817 | 1.01  |
| PA3125_at        | 21.18   | 17.67   | 0.484 | 1.20  |
| PA3126_ibpA_at   | 118.60  | 122.93  | 0.817 | -1.04 |
| PA3127_at        | 38.60   | 32.13   | 0.349 | 1.20  |
| PA3128_at        | 51.38   | 28.10   | 0.079 | 1.83  |
| PA3129_at        | 72.90   | 96.17   | 0.024 | -1.32 |
| PA3130_at        | 83.86   | 77.50   | 0.484 | 1.08  |
| PA3131_at        | 149.20  | 111.28  | 0.048 | 1.34  |
| PA3132_at        | 22.96   | 35.52   | 0.032 | -1.55 |
| PA3133_at        | 26.38   | 27.50   | 1.000 | -1.04 |
| PA3134_gltX_at   | 308.54  | 553.72  | 0.008 | -1.79 |
| PA3135_at        | 46.34   | 46.67   | 0.817 | -1.01 |
| PA3136_at        | 19.64   | 21.92   | 0.643 | -1.12 |
| PA3137_at        | 11.66   | 6.35    | 0.484 | 1.84  |
| PA3138_uvrB_at   | 107.16  | 111.63  | 0.484 | -1.04 |
| PA3139_at        | 1159.72 | 1158.90 | 0.484 | 1.00  |
| PA3140_at        | 15.36   | 6.47    | 0.008 | 2.37  |
| PA3141_wbpM_g_at | 119.46  | 138.90  | 0.238 | -1.16 |
| PA3142_i_at      | 41.06   | 51.52   | 0.238 | -1.25 |
| PA3143_at        | 44.26   | 38.20   | 0.413 | 1.16  |
| PA3144_f_at      | 29.60   | 48.90   | 0.008 | -1.65 |
| PA3145_wbpL_at   | 55.14   | 99.45   | 0.008 | -1.80 |
| PA3146_wbpK_at   | 226.16  | 279.23  | 0.008 | -1.23 |
| PA3147_wbpJ_at   | 177.20  | 361.52  | 0.008 | -2.04 |
| PA3148_wbpI_at   | 103.88  | 154.50  | 0.024 | -1.49 |
| PA3149_wbpH_at   | 62.94   | 132.70  | 0.008 | -2.11 |
| PA3150_wbpG_at   | 51.10   | 115.27  | 0.008 | -2.26 |
| PA3151_hisF2_at  | 157.34  | 255.40  | 0.008 | -1.62 |
| PA3152_hisH2_at  | 70.62   | 135.65  | 0.008 | -1.92 |
| PA3153_wzx_at    | 12.04   | 18.22   | 0.151 | -1.51 |
| PA3154_wzy_at    | 20.58   | 21.10   | 0.643 | -1.03 |
| PA3155_wbpE_at   | 148.96  | 275.40  | 0.008 | -1.85 |
| PA3156_wbpD_at   | 124.18  | 197.10  | 0.008 | -1.59 |
| PA3157_at        | 38.46   | 50.90   | 0.024 | -1.32 |
| PA3158_wbpB_at   | 211.34  | 333.45  | 0.008 | -1.58 |
| PA3159_wbpA_at   | 440.94  | 523.00  | 0.048 | -1.19 |
| PA3160_wzz_at    | 80.54   | 98.97   | 0.151 | -1.23 |
| PA3161_himD_at   | 147.14  | 200.35  | 0.024 | -1.36 |
| PA3162_rpsA_at   | 2505.94 | 2475.75 | 0.817 | 1.01  |
| PA3163_cmk_at    | 256.18  | 297.45  | 0.151 | -1.16 |
| PA3164_at        | 348.04  | 343.60  | 0.643 | 1.01  |
| PA3165_hisC2_at  | 154.10  | 209.80  | 0.008 | -1.36 |
| PA3166_pheA_at   | 300.26  | 358.20  | 0.024 | -1.19 |
| PA3167_serC_at   | 353.44  | 486.45  | 0.008 | -1.38 |

### Supplementary Table 1. Probe set signal data for experimental and control samples

|                  |        |        |       |       |
|------------------|--------|--------|-------|-------|
| PA3168_gyrA_at   | 613.50 | 745.95 | 0.024 | -1.22 |
| PA3169_at        | 346.54 | 380.72 | 0.151 | -1.10 |
| PA3170_at        | 228.06 | 218.33 | 0.484 | 1.04  |
| PA3171_ubiG_at   | 496.84 | 424.70 | 0.008 | 1.17  |
| PA3172_at        | 464.60 | 397.42 | 0.087 | 1.17  |
| PA3173_at        | 134.46 | 184.55 | 0.008 | -1.37 |
| PA3174_at        | 19.88  | 22.15  | 0.151 | -1.11 |
| PA3175_at        | 26.82  | 30.05  | 0.484 | -1.12 |
| PA3176_gltS_at   | 21.44  | 10.93  | 0.008 | 1.96  |
| PA3177_at        | 118.80 | 104.80 | 0.643 | 1.13  |
| PA3178_at        | 49.08  | 47.13  | 0.643 | 1.04  |
| PA3179_at        | 269.30 | 478.95 | 0.008 | -1.78 |
| PA3180_at        | 6.88   | 15.55  | 0.008 | -2.26 |
| PA3181_at        | 66.28  | 90.30  | 0.349 | -1.36 |
| PA3182_at        | 259.04 | 280.05 | 0.643 | -1.08 |
| PA3183_zwf_at    | 244.94 | 285.55 | 0.484 | -1.17 |
| PA3184_at        | 66.12  | 78.30  | 0.151 | -1.18 |
| PA3185_at        | 133.00 | 105.53 | 0.087 | 1.26  |
| PA3186_oprB_s_at | 288.52 | 400.67 | 0.008 | -1.39 |
| PA3187_at        | 293.90 | 243.02 | 0.484 | 1.21  |
| PA3188_at        | 118.76 | 121.25 | 1.000 | -1.02 |
| PA3189_at        | 98.54  | 79.57  | 0.484 | 1.24  |
| PA3190_at        | 611.36 | 398.47 | 0.048 | 1.53  |
| PA3191_at        | 31.08  | 23.13  | 0.048 | 1.34  |
| PA3192_gltR_at   | 80.94  | 79.90  | 0.643 | 1.01  |
| PA3193_glk_at    | 118.90 | 118.45 | 0.817 | 1.00  |
| PA3194_edd_at    | 166.88 | 181.27 | 0.238 | -1.09 |
| PA3195_gapA_at   | 278.96 | 314.45 | 0.087 | -1.13 |
| PA3196_at        | 62.18  | 69.78  | 0.238 | -1.12 |
| PA3197_at        | 95.74  | 101.85 | 0.643 | -1.06 |
| PA3198_at        | 50.62  | 64.05  | 0.087 | -1.27 |
| PA3199_at        | 122.22 | 142.90 | 0.151 | -1.17 |
| PA3200_at        | 93.14  | 73.47  | 0.048 | 1.27  |
| PA3201_at        | 339.88 | 300.33 | 0.151 | 1.13  |
| PA3202_at        | 530.32 | 441.15 | 0.008 | 1.20  |
| PA3203_at        | 360.84 | 301.58 | 0.008 | 1.20  |
| PA3204_at        | 233.84 | 161.45 | 0.024 | 1.45  |
| PA3205_at        | 340.96 | 145.52 | 0.151 | 2.34  |
| PA3206_at        | 68.12  | 40.65  | 0.008 | 1.68  |
| PA3207_at        | 32.02  | 43.85  | 0.063 | -1.37 |
| PA3208_at        | 115.70 | 92.97  | 0.008 | 1.24  |
| PA3209_at        | 19.46  | 20.67  | 0.643 | -1.06 |
| PA3210_trkH_at   | 17.10  | 55.38  | 0.008 | -3.24 |
| PA3211_at        | 142.90 | 105.13 | 0.024 | 1.36  |
| PA3212_at        | 185.86 | 129.85 | 0.024 | 1.43  |
| PA3213_at        | 121.40 | 114.03 | 0.643 | 1.06  |
| PA3214_at        | 100.82 | 86.28  | 0.048 | 1.17  |
| PA3215_at        | 68.28  | 61.42  | 0.048 | 1.11  |
| PA3216_at        | 21.62  | 11.82  | 0.008 | 1.83  |
| PA3217_at        | 62.60  | 64.05  | 0.643 | -1.02 |
| PA3218_at        | 1.60   | 2.55   | 0.730 | -1.59 |

## Supplementary Table 1. Probe set signal data for experimental and control samples

|                |        |        |       |       |
|----------------|--------|--------|-------|-------|
| PA3219_at      | 18.26  | 13.60  | 0.151 | 1.34  |
| PA3220_at      | 84.98  | 84.38  | 0.817 | 1.01  |
| PA3221_csaA_at | 39.26  | 52.93  | 0.349 | -1.35 |
| PA3222_at      | 46.60  | 40.32  | 0.238 | 1.16  |
| PA3223_acpD_at | 17.64  | 14.10  | 0.484 | 1.25  |
| PA3224_at      | 53.26  | 75.88  | 0.008 | -1.42 |
| PA3225_at      | 155.12 | 148.20 | 0.484 | 1.05  |
| PA3226_at      | 81.40  | 79.75  | 0.817 | 1.02  |
| PA3227_ppiA_at | 540.86 | 507.18 | 0.238 | 1.07  |
| PA3228_at      | 104.26 | 85.53  | 0.048 | 1.22  |
| PA3229_at      | 21.96  | 21.70  | 1.000 | 1.01  |
| PA3230_at      | 31.86  | 30.32  | 0.349 | 1.05  |
| PA3231_at      | 14.12  | 3.30   | 0.008 | 4.28  |
| PA3232_at      | 44.28  | 34.07  | 0.048 | 1.30  |
| PA3233_at      | 47.04  | 25.70  | 0.048 | 1.83  |
| PA3234_at      | 178.76 | 101.67 | 0.048 | 1.76  |
| PA3235_at      | 184.88 | 94.60  | 0.048 | 1.95  |
| PA3236_at      | 30.88  | 31.45  | 0.730 | -1.02 |
| PA3237_at      | 5.54   | 5.00   | 1.000 | 1.11  |
| PA3238_at      | 137.38 | 102.75 | 0.048 | 1.34  |
| PA3239_at      | 169.16 | 119.15 | 0.008 | 1.42  |
| PA3240_at      | 28.34  | 36.08  | 0.151 | -1.27 |
| PA3241_at      | 38.70  | 36.63  | 0.484 | 1.06  |
| PA3242_at      | 65.30  | 63.78  | 0.643 | 1.02  |
| PA3243_minC_at | 286.92 | 237.67 | 0.048 | 1.21  |
| PA3244_minD_at | 797.58 | 831.00 | 0.643 | -1.04 |
| PA3245_minE_at | 314.58 | 431.75 | 0.008 | -1.37 |
| PA3246_rluA_at | 211.70 | 267.30 | 0.048 | -1.26 |
| PA3247_at      | 120.34 | 128.25 | 0.349 | -1.07 |
| PA3248_at      | 37.10  | 32.13  | 0.349 | 1.15  |
| PA3249_at      | 5.96   | 1.70   | 0.151 | 3.51  |
| PA3250_at      | 59.42  | 52.40  | 0.151 | 1.13  |
| PA3251_at      | 22.56  | 22.00  | 0.817 | 1.03  |
| PA3252_at      | 16.08  | 9.52   | 0.111 | 1.69  |
| PA3253_at      | 12.42  | 12.05  | 0.635 | 1.03  |
| PA3254_at      | 23.58  | 28.00  | 0.349 | -1.19 |
| PA3255_at      | 113.00 | 103.83 | 0.238 | 1.09  |
| PA3256_at      | 29.16  | 40.35  | 0.008 | -1.38 |
| PA3257_prc_at  | 387.74 | 332.10 | 0.349 | 1.17  |
| PA3258_at      | 29.12  | 33.58  | 0.349 | -1.15 |
| PA3259_at      | 89.92  | 87.70  | 0.730 | 1.03  |
| PA3260_at      | 126.30 | 146.85 | 0.151 | -1.16 |
| PA3261_at      | 25.70  | 25.05  | 1.000 | 1.03  |
| PA3262_at      | 925.62 | 945.77 | 0.817 | -1.02 |
| PA3263_at      | 452.74 | 416.00 | 0.349 | 1.09  |
| PA3264_at      | 41.66  | 46.08  | 0.492 | -1.11 |
| PA3265_at      | 20.72  | 26.88  | 0.048 | -1.30 |
| PA3266_capB_at | 54.86  | 90.85  | 0.008 | -1.66 |
| PA3267_at      | 68.40  | 100.28 | 0.008 | -1.47 |
| PA3268_at      | 54.08  | 93.57  | 0.048 | -1.73 |
| PA3269_at      | 38.82  | 33.17  | 0.151 | 1.17  |



**Supplementary Table 1. Probe set signal data for experimental and control samples**

|                 |        |        |       |       |
|-----------------|--------|--------|-------|-------|
| PA3270_at       | 256.66 | 228.95 | 0.484 | 1.12  |
| PA3271_at       | 65.20  | 52.52  | 0.349 | 1.24  |
| PA3272_at       | 60.82  | 40.00  | 0.024 | 1.52  |
| PA3273_at       | 2.86   | 3.72   | 0.730 | -1.30 |
| PA3274_at       | 7.74   | 5.03   | 0.643 | 1.54  |
| PA3275_at       | 52.90  | 31.85  | 0.024 | 1.66  |
| PA3276_at       | 44.24  | 56.90  | 0.238 | -1.29 |
| PA3277_at       | 27.34  | 24.35  | 0.730 | 1.12  |
| PA3278_at       | 48.48  | 49.07  | 0.817 | -1.01 |
| PA3279_oprP_at  | 4.46   | 10.65  | 0.024 | -2.39 |
| PA3280_oprO_at  | 21.92  | 27.68  | 0.151 | -1.26 |
| PA3281_at       | 58.74  | 26.45  | 0.008 | 2.22  |
| PA3282_at       | 107.26 | 42.30  | 0.008 | 2.54  |
| PA3283_at       | 258.28 | 82.68  | 0.008 | 3.12  |
| PA3284_at       | 274.66 | 122.07 | 0.008 | 2.25  |
| PA3285_at       | 192.30 | 200.00 | 0.817 | -1.04 |
| PA3286_at       | 434.02 | 428.18 | 1.000 | 1.01  |
| PA3287_at       | 50.28  | 43.10  | 0.238 | 1.17  |
| PA3288_at       | 32.48  | 34.00  | 0.817 | -1.05 |
| PA3289_at       | 22.34  | 16.83  | 0.087 | 1.33  |
| PA3290_at       | 50.10  | 55.05  | 0.238 | -1.10 |
| PA3291_at       | 15.28  | 18.00  | 0.238 | -1.18 |
| PA3292_at       | 13.84  | 13.47  | 0.817 | 1.03  |
| PA3293_at       | 46.88  | 33.17  | 0.008 | 1.41  |
| PA3294_s_at     | 106.22 | 118.15 | 0.087 | -1.11 |
| PA3295_at       | 140.34 | 180.45 | 0.008 | -1.29 |
| PA3296_phoA_at  | 23.32  | 26.07  | 0.643 | -1.12 |
| PA3297_at       | 137.10 | 141.90 | 0.484 | -1.04 |
| PA3298_at       | 21.66  | 29.58  | 0.190 | -1.37 |
| PA3299_fadD1_at | 482.06 | 478.80 | 0.817 | 1.01  |
| PA3300_fadD2_at | 62.62  | 42.42  | 0.008 | 1.48  |
| PA3301_at       | 275.32 | 271.55 | 0.817 | 1.01  |
| PA3302_at       | 125.00 | 178.35 | 0.008 | -1.43 |
| PA3303_at       | 17.96  | 12.40  | 0.349 | 1.45  |
| PA3304_at       | 37.28  | 35.88  | 1.000 | 1.04  |
| PA3305_at       | 39.02  | 27.75  | 0.087 | 1.41  |
| PA3306_at       | 251.78 | 150.17 | 0.024 | 1.68  |
| PA3307_r_at     | 78.84  | 61.05  | 0.238 | 1.29  |
| PA3308_hepA_at  | 295.86 | 368.33 | 0.048 | -1.24 |
| PA3309_at       | 194.98 | 311.00 | 0.349 | -1.60 |
| PA3310_at       | 85.58  | 106.13 | 0.048 | -1.24 |
| PA3311_at       | 1.80   | 2.05   | 0.643 | -1.14 |
| PA3312_at       | 41.90  | 42.90  | 1.000 | -1.02 |
| PA3313_at       | 743.78 | 751.65 | 1.000 | -1.01 |
| PA3314_at       | 398.06 | 289.33 | 0.008 | 1.38  |
| PA3315_at       | 32.80  | 39.35  | 0.151 | -1.20 |
| PA3316_at       | 34.90  | 42.20  | 0.008 | -1.21 |
| PA3317_at       | 77.32  | 77.80  | 0.643 | -1.01 |
| PA3318_at       | 20.72  | 23.43  | 0.349 | -1.13 |
| PA3319_plcN_at  | 5.74   | 8.30   | 0.151 | -1.45 |
| PA3320_at       | 7.10   | 5.80   | 0.817 | 1.22  |

## Supplementary Table 1. Probe set signal data for experimental and control samples

|                 |         |         |       |       |
|-----------------|---------|---------|-------|-------|
| PA3321_at       | 41.90   | 48.92   | 0.349 | -1.17 |
| PA3322_at       | 126.46  | 82.03   | 0.008 | 1.54  |
| PA3323_at       | 34.18   | 33.15   | 0.817 | 1.03  |
| PA3324_at       | 18.46   | 11.57   | 0.048 | 1.60  |
| PA3325_at       | 13.46   | 13.67   | 0.730 | -1.02 |
| PA3326_at       | 558.56  | 464.58  | 0.087 | 1.20  |
| PA3327_at       | 303.06  | 162.43  | 0.008 | 1.87  |
| PA3328_at       | 143.86  | 77.85   | 0.008 | 1.85  |
| PA3329_at       | 141.46  | 81.82   | 0.008 | 1.73  |
| PA3330_at       | 163.72  | 84.73   | 0.008 | 1.93  |
| PA3331_at       | 408.66  | 276.73  | 0.008 | 1.48  |
| PA3332_at       | 322.84  | 214.45  | 0.008 | 1.51  |
| PA3333_fabH2_at | 196.74  | 120.72  | 0.008 | 1.63  |
| PA3334_at       | 82.92   | 100.28  | 0.349 | -1.21 |
| PA3335_at       | 75.92   | 68.95   | 0.643 | 1.10  |
| PA3336_at       | 23.14   | 25.90   | 0.643 | -1.12 |
| PA3337_rfaD_at  | 29.92   | 32.92   | 0.484 | -1.10 |
| PA3338_at       | 37.64   | 36.83   | 1.000 | 1.02  |
| PA3339_at       | 76.32   | 66.53   | 0.238 | 1.15  |
| PA3340_at       | 106.42  | 93.00   | 0.238 | 1.14  |
| PA3341_at       | 93.74   | 124.25  | 0.151 | -1.33 |
| PA3342_at       | 22.58   | 20.40   | 0.643 | 1.11  |
| PA3343_at       | 60.70   | 40.82   | 0.008 | 1.49  |
| PA3344_recQ_at  | 139.06  | 134.07  | 0.817 | 1.04  |
| PA3345_at       | 110.66  | 140.08  | 0.008 | -1.27 |
| PA3346_at       | 19.06   | 18.05   | 0.484 | 1.06  |
| PA3347_at       | 46.26   | 39.42   | 0.151 | 1.17  |
| PA3348_at       | 208.28  | 178.05  | 0.024 | 1.17  |
| PA3349_at       | 295.96  | 268.10  | 0.238 | 1.10  |
| PA3350_at       | 101.30  | 100.97  | 1.000 | 1.00  |
| PA3351_at       | 1757.92 | 1394.52 | 0.048 | 1.26  |
| PA3352_at       | 649.22  | 561.90  | 0.151 | 1.16  |
| PA3353_at       | 242.12  | 187.45  | 0.151 | 1.29  |
| PA3354_at       | 34.22   | 31.40   | 0.484 | 1.09  |
| PA3355_at       | 65.22   | 33.80   | 0.008 | 1.93  |
| PA3356_at       | 286.18  | 217.43  | 0.087 | 1.32  |
| PA3357_dsdA_at  | 157.38  | 135.92  | 0.048 | 1.16  |
| PA3358_at       | 23.44   | 29.75   | 0.349 | -1.27 |
| PA3359_at       | 7.24    | 4.80    | 0.048 | 1.51  |
| PA3360_at       | 11.48   | 7.18    | 0.286 | 1.60  |
| PA3361_at       | 23.54   | 28.08   | 0.484 | -1.19 |
| PA3362_at       | 22.46   | 16.45   | 0.238 | 1.37  |
| PA3363_amiR_at  | 49.98   | 31.10   | 0.008 | 1.61  |
| PA3364_amiC_at  | 54.92   | 32.72   | 0.008 | 1.68  |
| PA3365_at       | 98.74   | 60.28   | 0.008 | 1.64  |
| PA3366_amiE_at  | 64.36   | 54.18   | 0.349 | 1.19  |
| PA3367_at       | 4.16    | 10.40   | 0.008 | -2.50 |
| PA3368_at       | 18.60   | 18.38   | 0.992 | 1.01  |
| PA3369_at       | 54.44   | 43.85   | 0.024 | 1.24  |
| PA3370_at       | 39.80   | 18.15   | 0.008 | 2.19  |
| PA3371_at       | 42.86   | 33.25   | 0.238 | 1.29  |

### Supplementary Table 1. Probe set signal data for experimental and control samples

|                 |         |         |       |       |
|-----------------|---------|---------|-------|-------|
| PA3372_at       | 15.10   | 20.98   | 0.048 | -1.39 |
| PA3373_at       | 57.96   | 59.85   | 0.643 | -1.03 |
| PA3374_at       | 17.82   | 15.85   | 0.643 | 1.12  |
| PA3375_at       | 12.66   | 16.42   | 0.349 | -1.30 |
| PA3376_at       | 2.08    | 1.78    | 0.341 | 1.17  |
| PA3377_at       | 17.22   | 18.10   | 0.643 | -1.05 |
| PA3378_at       | 12.74   | 14.07   | 0.643 | -1.10 |
| PA3379_at       | 2.66    | 3.50    | 0.905 | -1.32 |
| PA3380_at       | 9.50    | 7.20    | 0.817 | 1.32  |
| PA3381_at       | 22.96   | 25.47   | 0.643 | -1.11 |
| PA3382_phnE_at  | 2.80    | 7.00    | 0.190 | -2.50 |
| PA3383_at       | 10.88   | 11.42   | 0.643 | -1.05 |
| PA3384_phnC_at  | 5.22    | 16.85   | 0.008 | -3.23 |
| PA3385_at       | 2670.96 | 2186.13 | 0.643 | 1.22  |
| PA3386_at       | 33.48   | 31.27   | 0.643 | 1.07  |
| PA3387_rhlG_at  | 35.68   | 26.15   | 0.048 | 1.36  |
| PA3388_at       | 149.96  | 112.75  | 0.024 | 1.33  |
| PA3389_at       | 16.08   | 25.02   | 0.151 | -1.56 |
| PA3390_at       | 18.74   | 16.38   | 0.413 | 1.14  |
| PA3391_nosR_at  | 6.84    | 7.98    | 0.556 | -1.17 |
| PA3392_nosZ_at  | 27.86   | 20.05   | 0.190 | 1.39  |
| PA3393_nosD_at  | 11.34   | 28.48   | 0.008 | -2.51 |
| PA3394_nosF_at  | 11.78   | 12.72   | 0.643 | -1.08 |
| PA3395_nosY_at  | 10.68   | 11.70   | 0.817 | -1.10 |
| PA3396_nosL_at  | 5.92    | 8.45    | 0.238 | -1.43 |
| PA3397_fpr_at   | 221.66  | 290.97  | 0.087 | -1.31 |
| PA3398_at       | 55.16   | 70.47   | 0.048 | -1.28 |
| PA3399_at       | 40.92   | 29.03   | 0.048 | 1.41  |
| PA3400_at       | 22.84   | 34.38   | 0.024 | -1.51 |
| PA3401_at       | 61.36   | 54.75   | 0.349 | 1.12  |
| PA3402_at       | 58.78   | 63.00   | 0.484 | -1.07 |
| PA3403_at       | 49.52   | 81.78   | 0.008 | -1.65 |
| PA3404_at       | 47.40   | 22.17   | 0.008 | 2.14  |
| PA3405_hasE_at  | 14.34   | 17.42   | 0.238 | -1.21 |
| PA3406_hasD_at  | 29.04   | 28.60   | 0.484 | 1.02  |
| PA3407_hasAp_at | 1.02    | 2.30    | 0.008 | -2.25 |
| PA3408_hasR_at  | 23.54   | 24.50   | 0.643 | -1.04 |
| PA3409_at       | 24.22   | 17.13   | 0.087 | 1.41  |
| PA3410_at       | 43.30   | 61.43   | 0.008 | -1.42 |
| PA3411_r_at     | 44.90   | 59.13   | 0.151 | -1.32 |
| PA3412_at       | 12.46   | 11.02   | 0.413 | 1.13  |
| PA3413_at       | 766.00  | 174.70  | 0.008 | 4.38  |
| PA3414_at       | 459.46  | 47.00   | 0.008 | 9.78  |
| PA3415_at       | 20.36   | 21.00   | 0.643 | -1.03 |
| PA3416_at       | 3.80    | 6.32    | 0.190 | -1.66 |
| PA3417_at       | 44.04   | 17.83   | 0.008 | 2.47  |
| PA3418_ldh_at   | 23.96   | 20.15   | 0.349 | 1.19  |
| PA3419_at       | 71.86   | 39.30   | 0.008 | 1.83  |
| PA3420_at       | 7.94    | 11.75   | 0.048 | -1.48 |
| PA3421_at       | 12.06   | 11.07   | 0.817 | 1.09  |
| PA3422_at       | 5.98    | 2.13    | 0.151 | 2.81  |

## Supplementary Table 1. Probe set signal data for experimental and control samples

|                 |         |         |       |       |
|-----------------|---------|---------|-------|-------|
| PA3423_at       | 44.68   | 41.35   | 0.643 | 1.08  |
| PA3424_at       | 31.42   | 22.27   | 0.008 | 1.41  |
| PA3425_at       | 26.76   | 31.35   | 0.238 | -1.17 |
| PA3426_at       | 32.38   | 26.75   | 0.635 | 1.21  |
| PA3427_at       | 11.36   | 10.05   | 0.643 | 1.13  |
| PA3428_at       | 11.38   | 10.70   | 1.000 | 1.06  |
| PA3429_at       | 10.44   | 10.05   | 0.643 | 1.04  |
| PA3430_at       | 19.74   | 10.90   | 0.008 | 1.81  |
| PA3431_at       | 13.54   | 27.38   | 0.008 | -2.02 |
| PA3432_i_at     | 18.26   | 28.33   | 0.151 | -1.55 |
| PA3433_at       | 21.44   | 22.35   | 0.484 | -1.04 |
| PA3435_at       | 423.86  | 527.78  | 0.008 | -1.25 |
| PA3436_at       | 42.76   | 40.77   | 1.000 | 1.05  |
| PA3437_at       | 158.20  | 137.40  | 0.151 | 1.15  |
| PA3438_folE1_at | 81.42   | 101.15  | 0.238 | -1.24 |
| PA3439_folX_at  | 227.64  | 204.42  | 0.484 | 1.11  |
| PA3440_at       | 1720.28 | 1399.13 | 0.008 | 1.23  |
| PA3441_at       | 7.22    | 17.33   | 0.048 | -2.40 |
| PA3442_at       | 10.02   | 17.50   | 0.238 | -1.75 |
| PA3443_at       | 20.60   | 13.68   | 0.349 | 1.51  |
| PA3444_at       | 9.92    | 4.70    | 0.087 | 2.11  |
| PA3445_at       | 7.84    | 7.70    | 0.817 | 1.02  |
| PA3446_at       | 31.70   | 35.15   | 0.817 | -1.11 |
| PA3447_at       | 3.80    | 4.50    | 0.643 | -1.18 |
| PA3448_at       | 14.14   | 10.45   | 0.817 | 1.35  |
| PA3449_at       | 5.22    | 4.50    | 0.643 | 1.16  |
| PA3450_at       | 75.92   | 101.00  | 0.643 | -1.33 |
| PA3451_at       | 1.46    | 5.05    | 0.151 | -3.46 |
| PA3452_mqoA_at  | 264.20  | 352.20  | 0.048 | -1.33 |
| PA3453_at       | 208.40  | 250.25  | 0.238 | -1.20 |
| PA3454_at       | 20.82   | 23.10   | 0.484 | -1.11 |
| PA3455_at       | 85.40   | 70.10   | 0.238 | 1.22  |
| PA3456_at       | 132.06  | 97.28   | 0.024 | 1.36  |
| PA3457_at       | 28.90   | 31.42   | 0.643 | -1.09 |
| PA3458_at       | 29.28   | 47.60   | 0.048 | -1.63 |
| PA3459_at       | 52.98   | 28.20   | 0.008 | 1.88  |
| PA3460_at       | 44.16   | 29.67   | 0.048 | 1.49  |
| PA3461_at       | 19.90   | 19.05   | 0.484 | 1.04  |
| PA3462_at       | 3.72    | 12.22   | 0.008 | -3.28 |
| PA3463_at       | 148.64  | 128.75  | 0.349 | 1.15  |
| PA3464_at       | 23.12   | 19.50   | 0.349 | 1.19  |
| PA3465_at       | 22.54   | 18.13   | 0.484 | 1.24  |
| PA3466_at       | 104.46  | 144.10  | 0.048 | -1.38 |
| PA3467_at       | 8.82    | 8.13    | 0.817 | 1.08  |
| PA3468_at       | 228.02  | 221.70  | 1.000 | 1.03  |
| PA3469_at       | 158.54  | 130.48  | 0.008 | 1.22  |
| PA3470_i_at     | 75.16   | 69.50   | 0.817 | 1.08  |
| PA3471_at       | 269.70  | 181.27  | 0.048 | 1.49  |
| PA3472_at       | 162.48  | 132.83  | 0.048 | 1.22  |
| PA3473_at       | 34.62   | 34.05   | 0.817 | 1.02  |
| PA3474_at       | 31.10   | 39.38   | 0.008 | -1.27 |

### Supplementary Table 1. Probe set signal data for experimental and control samples

|                 |        |        |       |       |
|-----------------|--------|--------|-------|-------|
| PA3475_pheC_at  | 50.14  | 62.45  | 0.151 | -1.25 |
| PA3476_rhlL_at  | 244.06 | 224.18 | 0.151 | 1.09  |
| PA3477_rhlR_at  | 152.30 | 165.75 | 0.349 | -1.09 |
| PA3478_rhlB_at  | 34.20  | 39.02  | 0.286 | -1.14 |
| PA3479_rhlA_at  | 82.78  | 70.83  | 0.087 | 1.17  |
| PA3480_at       | 806.66 | 627.13 | 0.008 | 1.29  |
| PA3481_at       | 391.34 | 339.63 | 0.151 | 1.15  |
| PA3482_metG_at  | 980.46 | 915.28 | 0.151 | 1.07  |
| PA3483_at       | 229.24 | 237.00 | 0.643 | -1.03 |
| PA3484_at       | 217.04 | 241.35 | 0.349 | -1.11 |
| PA3485_r_at     | 108.34 | 123.65 | 0.190 | -1.14 |
| PA3486_at       | 45.30  | 65.78  | 0.024 | -1.45 |
| PA3487_at       | 95.98  | 99.90  | 0.817 | -1.04 |
| PA3488_at       | 177.26 | 164.43 | 0.643 | 1.08  |
| PA3489_at       | 99.02  | 122.10 | 0.008 | -1.23 |
| PA3490_at       | 85.16  | 102.82 | 0.484 | -1.21 |
| PA3491_at       | 235.92 | 279.83 | 0.087 | -1.19 |
| PA3492_at       | 49.26  | 53.97  | 0.349 | -1.10 |
| PA3493_at       | 42.48  | 49.00  | 0.151 | -1.15 |
| PA3494_at       | 60.50  | 67.45  | 0.484 | -1.11 |
| PA3495_nth_at   | 79.12  | 107.72 | 0.008 | -1.36 |
| PA3496_at       | 73.36  | 173.32 | 0.008 | -2.36 |
| PA3497_at       | 12.86  | 17.02  | 0.349 | -1.32 |
| PA3498_at       | 12.74  | 16.75  | 0.151 | -1.31 |
| PA3499_at       | 33.16  | 38.75  | 0.087 | -1.17 |
| PA3500_at       | 36.54  | 37.03  | 0.817 | -1.01 |
| PA3501_at       | 24.80  | 36.00  | 0.048 | -1.45 |
| PA3502_at       | 31.36  | 28.53  | 0.484 | 1.10  |
| PA3503_at       | 29.54  | 26.07  | 0.484 | 1.13  |
| PA3504_at       | 27.44  | 18.15  | 0.048 | 1.51  |
| PA3505_at       | 24.38  | 26.52  | 0.484 | -1.09 |
| PA3506_at       | 25.94  | 12.10  | 0.008 | 2.14  |
| PA3507_at       | 28.70  | 15.15  | 0.008 | 1.89  |
| PA3508_at       | 30.38  | 18.83  | 0.048 | 1.61  |
| PA3509_at       | 34.72  | 27.05  | 0.151 | 1.28  |
| PA3510_at       | 46.52  | 25.72  | 0.008 | 1.81  |
| PA3511_at       | 55.96  | 32.38  | 0.024 | 1.73  |
| PA3512_at       | 25.90  | 16.33  | 0.024 | 1.59  |
| PA3513_at       | 15.84  | 6.88   | 0.087 | 2.30  |
| PA3514_at       | 32.10  | 23.20  | 0.048 | 1.38  |
| PA3515_at       | 5.82   | 7.60   | 0.349 | -1.31 |
| PA3516_at       | 16.68  | 10.52  | 0.151 | 1.59  |
| PA3517_at       | 17.02  | 21.70  | 0.238 | -1.27 |
| PA3518_at       | 10.98  | 8.95   | 0.643 | 1.23  |
| PA3519_at       | 12.92  | 12.88  | 0.468 | 1.00  |
| PA3520_at       | 10.28  | 9.23   | 0.635 | 1.11  |
| PA3521_at       | 2.42   | 3.63   | 0.063 | -1.50 |
| PA3522_at       | 19.22  | 11.30  | 0.151 | 1.70  |
| PA3523_at       | 11.98  | 3.85   | 0.151 | 3.11  |
| PA3524_gloA1_at | 393.84 | 637.38 | 0.024 | -1.62 |
| PA3525_argG_at  | 599.38 | 962.75 | 0.008 | -1.61 |

**Supplementary Table 1. Probe set signal data for experimental and control samples**

|                |         |         |       |       |
|----------------|---------|---------|-------|-------|
| PA3526_at      | 144.92  | 110.22  | 0.151 | 1.31  |
| PA3527_pyrC_at | 390.64  | 476.80  | 0.008 | -1.22 |
| PA3528_rnt_at  | 515.96  | 412.33  | 0.087 | 1.25  |
| PA3529_at      | 1051.56 | 1289.03 | 0.151 | -1.23 |
| PA3530_at      | 27.84   | 50.83   | 0.024 | -1.83 |
| PA3531_bfrB_at | 113.96  | 227.50  | 0.008 | -2.00 |
| PA3532_at      | 27.78   | 28.45   | 0.349 | -1.02 |
| PA3533_at      | 490.32  | 684.65  | 0.048 | -1.40 |
| PA3534_at      | 28.74   | 17.17   | 0.151 | 1.67  |
| PA3535_at      | 170.62  | 106.72  | 0.008 | 1.60  |
| PA3536_at      | 64.10   | 61.38   | 0.484 | 1.04  |
| PA3537_argF_at | 393.34  | 362.03  | 0.643 | 1.09  |
| PA3538_at      | 166.34  | 152.88  | 0.238 | 1.09  |
| PA3539_at      | 89.00   | 119.60  | 0.008 | -1.34 |
| PA3540_algD_at | 8.40    | 9.68    | 0.643 | -1.15 |
| PA3541_at      | 6.88    | 5.95    | 0.730 | 1.16  |
| PA3542_at      | 22.18   | 27.10   | 0.349 | -1.22 |
| PA3543_algK_at | 4.98    | 2.80    | 0.484 | 1.78  |
| PA3544_algE_at | 22.32   | 16.17   | 0.238 | 1.38  |
| PA3545_algG_at | 9.54    | 10.52   | 0.817 | -1.10 |
| PA3546_algX_at | 18.56   | 22.35   | 0.349 | -1.20 |
| PA3547_algL_at | 2.14    | 12.33   | 0.008 | -5.76 |
| PA3548_algI_at | 12.58   | 8.05    | 0.063 | 1.56  |
| PA3549_algJ_at | 24.98   | 22.30   | 0.817 | 1.12  |
| PA3550_algF_at | 13.12   | 17.88   | 0.349 | -1.36 |
| PA3551_algA_at | 34.14   | 36.20   | 1.000 | -1.06 |
| PA3552_at      | 716.64  | 448.57  | 0.008 | 1.60  |
| PA3553_at      | 407.32  | 288.63  | 0.008 | 1.41  |
| PA3554_at      | 671.30  | 443.10  | 0.008 | 1.52  |
| PA3555_at      | 108.76  | 75.97   | 0.048 | 1.43  |
| PA3556_at      | 216.02  | 218.70  | 0.349 | -1.01 |
| PA3557_at      | 56.06   | 66.43   | 0.048 | -1.18 |
| PA3558_at      | 163.98  | 177.77  | 0.238 | -1.08 |
| PA3559_at      | 251.60  | 155.25  | 0.024 | 1.62  |
| PA3560_fruA_at | 43.30   | 36.63   | 0.048 | 1.18  |
| PA3561_fruK_at | 90.28   | 88.50   | 0.643 | 1.02  |
| PA3562_at      | 71.06   | 73.90   | 0.817 | -1.04 |
| PA3563_fruR_at | 152.02  | 165.15  | 0.817 | -1.09 |
| PA3564_at      | 11.04   | 12.52   | 0.817 | -1.13 |
| PA3565_at      | 28.90   | 27.27   | 1.000 | 1.06  |
| PA3566_at      | 170.00  | 154.70  | 0.087 | 1.10  |
| PA3567_at      | 133.06  | 133.48  | 0.643 | -1.00 |
| PA3568_at      | 10.08   | 13.02   | 0.349 | -1.29 |
| PA3569_mmsB_at | 14.12   | 13.57   | 1.000 | 1.04  |
| PA3570_mmsA_at | 40.50   | 25.70   | 0.008 | 1.58  |
| PA3571_mmsR_at | 28.94   | 23.60   | 0.238 | 1.23  |
| PA3572_at      | 47.28   | 74.22   | 0.238 | -1.57 |
| PA3573_at      | 30.26   | 23.48   | 0.238 | 1.29  |
| PA3574_at      | 38.10   | 88.58   | 0.008 | -2.32 |
| PA3575_at      | 249.42  | 148.70  | 0.024 | 1.68  |
| PA3576_at      | 64.26   | 60.20   | 0.817 | 1.07  |

### Supplementary Table 1. Probe set signal data for experimental and control samples

|                |         |        |       |       |
|----------------|---------|--------|-------|-------|
| PA3577_i_at    | 11.34   | 30.25  | 0.008 | -2.67 |
| PA3578_at      | 31.12   | 40.05  | 0.238 | -1.29 |
| PA3579_at      | 40.50   | 32.92  | 0.349 | 1.23  |
| PA3580_at      | 76.10   | 87.82  | 0.151 | -1.15 |
| PA3581_glpF_at | 13.98   | 30.45  | 0.024 | -2.18 |
| PA3582_glpK_at | 36.62   | 75.57  | 0.048 | -2.06 |
| PA3583_glpR_at | 154.28  | 139.95 | 0.238 | 1.10  |
| PA3584_glpD_at | 21.84   | 34.10  | 0.008 | -1.56 |
| PA3585_glpM_at | 55.50   | 70.75  | 0.087 | -1.27 |
| PA3586_at      | 18.62   | 14.15  | 0.817 | 1.32  |
| PA3587_metR_at | 96.48   | 89.95  | 0.643 | 1.07  |
| PA3588_at      | 9.90    | 8.43   | 0.817 | 1.17  |
| PA3589_at      | 3.04    | 2.48   | 0.817 | 1.23  |
| PA3590_at      | 13.04   | 18.90  | 0.484 | -1.45 |
| PA3591_at      | 12.32   | 5.75   | 0.048 | 2.14  |
| PA3592_at      | 10.70   | 17.63  | 0.087 | -1.65 |
| PA3593_at      | 24.32   | 17.23  | 0.024 | 1.41  |
| PA3594_at      | 38.84   | 35.75  | 0.349 | 1.09  |
| PA3595_at      | 6.62    | 9.32   | 0.349 | -1.41 |
| PA3596_at      | 14.12   | 10.65  | 0.643 | 1.33  |
| PA3597_at      | 10.90   | 10.55  | 1.000 | 1.03  |
| PA3598_at      | 9.54    | 14.95  | 0.286 | -1.57 |
| PA3599_at      | 30.12   | 30.10  | 0.484 | 1.00  |
| PA3600_at      | 14.60   | 12.75  | 0.817 | 1.15  |
| PA3601_at      | 26.36   | 28.83  | 0.817 | -1.09 |
| PA3602_at      | 310.44  | 181.82 | 0.008 | 1.71  |
| PA3603_dgkA_at | 82.62   | 91.65  | 0.484 | -1.11 |
| PA3604_at      | 376.88  | 367.35 | 0.643 | 1.03  |
| PA3605_at      | 43.98   | 39.28  | 0.238 | 1.12  |
| PA3606_at      | 59.28   | 59.93  | 0.817 | -1.01 |
| PA3607_potA_at | 65.80   | 143.67 | 0.008 | -2.18 |
| PA3608_potB_at | 25.84   | 64.60  | 0.008 | -2.50 |
| PA3609_potC_at | 40.00   | 82.98  | 0.008 | -2.07 |
| PA3610_potD_at | 35.38   | 105.85 | 0.008 | -2.99 |
| PA3611_at      | 454.28  | 538.40 | 0.151 | -1.19 |
| PA3612_at      | 73.36   | 134.35 | 0.008 | -1.83 |
| PA3613_at      | 63.82   | 78.77  | 1.000 | -1.23 |
| PA3614_at      | 103.56  | 101.72 | 0.817 | 1.02  |
| PA3615_at      | 120.42  | 84.68  | 0.151 | 1.42  |
| PA3616_at      | 289.72  | 105.23 | 0.008 | 2.75  |
| PA3617_recA_at | 1917.54 | 706.10 | 0.008 | 2.72  |
| PA3618_at      | 224.80  | 167.47 | 0.008 | 1.34  |
| PA3619_at      | 19.60   | 17.20  | 0.484 | 1.14  |
| PA3620_mutS_at | 332.94  | 387.13 | 0.238 | -1.16 |
| PA3621_fdxA_at | 321.70  | 648.60 | 0.008 | -2.02 |
| PA3622_rpoS_at | 1175.56 | 742.13 | 0.008 | 1.58  |
| PA3623_at      | 110.72  | 100.18 | 0.151 | 1.11  |
| PA3624_pcm_at  | 379.26  | 369.15 | 0.817 | 1.03  |
| PA3625_surE_at | 844.86  | 758.58 | 0.048 | 1.11  |
| PA3626_at      | 190.62  | 230.90 | 0.008 | -1.21 |
| PA3627_at      | 344.04  | 330.27 | 0.643 | 1.04  |

### Supplementary Table 1. Probe set signal data for experimental and control samples

|                |         |         |       |       |
|----------------|---------|---------|-------|-------|
| PA3628_at      | 194.32  | 233.88  | 0.349 | -1.20 |
| PA3629_adhC_at | 198.40  | 229.47  | 0.238 | -1.16 |
| PA3630_at      | 16.32   | 10.05   | 0.238 | 1.62  |
| PA3631_at      | 159.24  | 229.88  | 0.008 | -1.44 |
| PA3632_at      | 207.62  | 280.90  | 0.087 | -1.35 |
| PA3633_at      | 172.68  | 206.27  | 0.087 | -1.19 |
| PA3634_at      | 210.88  | 337.08  | 0.008 | -1.60 |
| PA3635_eno_at  | 866.24  | 1031.65 | 0.087 | -1.19 |
| PA3636_kdsA_at | 292.52  | 478.13  | 0.008 | -1.63 |
| PA3637_pyrG_at | 1663.94 | 1427.97 | 0.048 | 1.17  |
| PA3638_at      | 67.02   | 76.30   | 0.484 | -1.14 |
| PA3639_accA_at | 324.78  | 416.05  | 0.048 | -1.28 |
| PA3640_dnaE_at | 383.58  | 371.95  | 0.349 | 1.03  |
| PA3641_at      | 343.90  | 659.55  | 0.008 | -1.92 |
| PA3642_rnhB_at | 86.86   | 123.75  | 0.048 | -1.42 |
| PA3643_lpxB_at | 302.98  | 337.45  | 0.484 | -1.11 |
| PA3644_lpxA_at | 520.78  | 661.45  | 0.024 | -1.27 |
| PA3645_fabZ_at | 606.84  | 932.13  | 0.008 | -1.54 |
| PA3646_lpxD_at | 820.48  | 928.95  | 0.349 | -1.13 |
| PA3647_at      | 1128.00 | 1284.47 | 0.484 | -1.14 |
| PA3648_at      | 350.64  | 483.28  | 0.048 | -1.38 |
| PA3649_at      | 89.42   | 108.28  | 0.024 | -1.21 |
| PA3650_dxr_at  | 180.92  | 211.25  | 0.151 | -1.17 |
| PA3651_cdsA_at | 101.06  | 163.95  | 0.008 | -1.62 |
| PA3652_uppS_at | 360.78  | 475.93  | 0.024 | -1.32 |
| PA3653_frr_at  | 1054.52 | 1551.15 | 0.008 | -1.47 |
| PA3654_pyrH_at | 1029.92 | 1334.82 | 0.024 | -1.30 |
| PA3655_tsf_at  | 1050.40 | 1602.80 | 0.008 | -1.53 |
| PA3656_rpsB_at | 2912.16 | 3356.13 | 0.087 | -1.15 |
| PA3657_map_at  | 815.82  | 923.73  | 0.151 | -1.13 |
| PA3658_glnD_at | 116.84  | 99.80   | 0.238 | 1.17  |
| PA3659_at      | 298.06  | 334.30  | 0.087 | -1.12 |
| PA3660_at      | 48.74   | 48.70   | 0.802 | 1.00  |
| PA3661_at      | 130.78  | 115.40  | 0.349 | 1.13  |
| PA3662_at      | 292.16  | 210.35  | 0.349 | 1.39  |
| PA3663_at      | 21.50   | 38.27   | 0.008 | -1.78 |
| PA3664_at      | 500.66  | 435.73  | 0.008 | 1.15  |
| PA3665_at      | 616.62  | 517.20  | 0.024 | 1.19  |
| PA3666_dapD_at | 801.14  | 612.68  | 0.008 | 1.31  |
| PA3667_at      | 80.38   | 96.10   | 0.238 | -1.20 |
| PA3668_at      | 47.02   | 60.38   | 0.048 | -1.28 |
| PA3669_at      | 24.46   | 10.72   | 0.008 | 2.28  |
| PA3670_at      | 77.02   | 54.80   | 0.048 | 1.41  |
| PA3671_at      | 47.48   | 28.58   | 0.087 | 1.66  |
| PA3672_at      | 161.22  | 81.05   | 0.008 | 1.99  |
| PA3673_plsB_at | 208.36  | 192.35  | 0.484 | 1.08  |
| PA3674_at      | 284.30  | 259.95  | 0.238 | 1.09  |
| PA3675_at      | 193.38  | 202.30  | 0.817 | -1.05 |
| PA3676_at      | 56.84   | 51.00   | 0.349 | 1.11  |
| PA3677_at      | 28.00   | 22.40   | 0.024 | 1.25  |
| PA3678_at      | 41.48   | 37.70   | 0.484 | 1.10  |



**Supplementary Table 1. Probe set signal data for experimental and control samples**

|                |        |         |       |       |
|----------------|--------|---------|-------|-------|
| PA3679_at      | 49.52  | 59.28   | 0.151 | -1.20 |
| PA3680_at      | 68.00  | 81.70   | 0.238 | -1.20 |
| PA3681_at      | 23.96  | 18.30   | 0.024 | 1.31  |
| PA3682_at      | 16.16  | 19.92   | 0.349 | -1.23 |
| PA3683_at      | 58.30  | 51.63   | 0.238 | 1.13  |
| PA3684_i_at    | 84.34  | 118.00  | 0.024 | -1.40 |
| PA3685_at      | 79.48  | 93.25   | 0.087 | -1.17 |
| PA3686_adk_at  | 621.48 | 743.78  | 0.151 | -1.20 |
| PA3687_ppc_at  | 145.34 | 77.10   | 0.008 | 1.89  |
| PA3688_at      | 9.70   | 19.40   | 0.151 | -2.00 |
| PA3689_at      | 113.84 | 83.30   | 0.048 | 1.37  |
| PA3690_at      | 73.10  | 64.77   | 0.349 | 1.13  |
| PA3691_at      | 484.44 | 309.00  | 0.008 | 1.57  |
| PA3692_at      | 190.80 | 120.65  | 0.024 | 1.58  |
| PA3693_at      | 72.26  | 66.25   | 0.643 | 1.09  |
| PA3694_at      | 136.56 | 149.80  | 0.238 | -1.10 |
| PA3695_at      | 115.42 | 125.75  | 0.349 | -1.09 |
| PA3696_at      | 60.18  | 59.50   | 0.643 | 1.01  |
| PA3697_at      | 209.58 | 172.95  | 0.008 | 1.21  |
| PA3698_at      | 74.16  | 70.40   | 1.000 | 1.05  |
| PA3699_at      | 140.48 | 134.48  | 0.643 | 1.04  |
| PA3700_lysS_at | 857.24 | 1089.20 | 0.048 | -1.27 |
| PA3701_prfB_at | 623.06 | 738.55  | 0.087 | -1.19 |
| PA3702_at      | 94.26  | 91.55   | 0.484 | 1.03  |
| PA3703_at      | 102.88 | 110.15  | 0.484 | -1.07 |
| PA3704_at      | 76.30  | 76.68   | 1.000 | -1.00 |
| PA3705_at      | 173.30 | 151.73  | 0.349 | 1.14  |
| PA3706_at      | 35.06  | 36.55   | 0.817 | -1.04 |
| PA3707_at      | 48.22  | 42.15   | 0.151 | 1.14  |
| PA3708_at      | 97.80  | 93.43   | 0.349 | 1.05  |
| PA3709_at      | 13.26  | 4.63    | 0.238 | 2.86  |
| PA3710_at      | 28.16  | 23.30   | 0.349 | 1.21  |
| PA3711_at      | 34.22  | 24.52   | 0.151 | 1.40  |
| PA3712_at      | 425.68 | 169.70  | 0.008 | 2.51  |
| PA3713_at      | 42.76  | 89.93   | 0.008 | -2.10 |
| PA3714_at      | 30.70  | 37.70   | 0.048 | -1.23 |
| PA3715_at      | 28.72  | 36.42   | 0.238 | -1.27 |
| PA3716_at      | 416.68 | 423.22  | 0.817 | -1.02 |
| PA3717_at      | 118.96 | 136.70  | 0.151 | -1.15 |
| PA3718_at      | 14.22  | 12.95   | 0.484 | 1.10  |
| PA3719_at      | 31.02  | 33.60   | 0.484 | -1.08 |
| PA3720_at      | 36.74  | 32.33   | 0.643 | 1.14  |
| PA3721_at      | 20.70  | 22.83   | 0.484 | -1.10 |
| PA3722_at      | 234.62 | 246.90  | 1.000 | -1.05 |
| PA3723_at      | 35.26  | 37.55   | 0.817 | -1.06 |
| PA3724_lasB_at | 134.06 | 119.88  | 0.484 | 1.12  |
| PA3725_recJ_at | 130.92 | 135.52  | 0.643 | -1.04 |
| PA3726_at      | 147.46 | 190.63  | 0.238 | -1.29 |
| PA3727_at      | 73.58  | 104.40  | 0.024 | -1.42 |
| PA3728_at      | 136.42 | 141.95  | 0.643 | -1.04 |
| PA3729_at      | 510.68 | 535.35  | 0.643 | -1.05 |

**Supplementary Table 1. Probe set signal data for experimental and control samples**

|                |         |         |       |       |
|----------------|---------|---------|-------|-------|
| PA3730_at      | 127.86  | 138.32  | 1.000 | -1.08 |
| PA3731_at      | 596.68  | 577.63  | 1.000 | 1.03  |
| PA3732_at      | 403.08  | 445.45  | 0.151 | -1.11 |
| PA3733_at      | 46.26   | 32.38   | 0.024 | 1.43  |
| PA3734_at      | 25.64   | 19.20   | 0.151 | 1.34  |
| PA3735_thrC_at | 303.80  | 352.15  | 0.238 | -1.16 |
| PA3736_hom_at  | 1053.10 | 832.85  | 0.008 | 1.26  |
| PA3737_dsbC_at | 301.48  | 336.75  | 0.238 | -1.12 |
| PA3738_xerD_at | 119.56  | 89.68   | 0.008 | 1.33  |
| PA3739_at      | 44.16   | 38.70   | 0.349 | 1.14  |
| PA3740_at      | 41.48   | 35.63   | 0.143 | 1.16  |
| PA3741_at      | 60.48   | 74.77   | 0.349 | -1.24 |
| PA3742_rplS_at | 1066.34 | 1191.25 | 0.048 | -1.12 |
| PA3743_trmD_at | 1705.14 | 2371.48 | 0.008 | -1.39 |
| PA3744_rimM_at | 1906.40 | 2043.15 | 0.238 | -1.07 |
| PA3745_rpsP_at | 2813.42 | 2683.05 | 0.643 | 1.05  |
| PA3746_ffh_at  | 318.50  | 447.63  | 0.024 | -1.41 |
| PA3747_at      | 303.10  | 264.47  | 0.024 | 1.15  |
| PA3748_at      | 178.78  | 126.73  | 0.008 | 1.41  |
| PA3749_at      | 8.40    | 10.33   | 0.151 | -1.23 |
| PA3750_at      | 51.26   | 50.88   | 0.817 | 1.01  |
| PA3751_purT_at | 87.66   | 108.03  | 0.048 | -1.23 |
| PA3752_at      | 220.40  | 202.60  | 0.286 | 1.09  |
| PA3753_at      | 146.84  | 171.70  | 0.048 | -1.17 |
| PA3754_at      | 137.34  | 124.23  | 0.151 | 1.11  |
| PA3755_at      | 93.74   | 87.15   | 0.643 | 1.08  |
| PA3756_at      | 403.02  | 424.38  | 0.484 | -1.05 |
| PA3757_at      | 65.86   | 82.72   | 0.349 | -1.26 |
| PA3758_at      | 67.64   | 89.88   | 0.087 | -1.33 |
| PA3759_at      | 55.48   | 63.28   | 0.349 | -1.14 |
| PA3760_at      | 21.24   | 27.20   | 0.286 | -1.28 |
| PA3761_at      | 26.30   | 18.90   | 0.484 | 1.39  |
| PA3762_at      | 48.42   | 37.47   | 0.008 | 1.29  |
| PA3763_purL_at | 389.10  | 529.30  | 0.024 | -1.36 |
| PA3764_at      | 94.02   | 122.17  | 0.024 | -1.30 |
| PA3765_at      | 22.98   | 27.48   | 0.349 | -1.20 |
| PA3766_at      | 50.96   | 50.80   | 0.817 | 1.00  |
| PA3767_at      | 38.50   | 83.45   | 0.008 | -2.17 |
| PA3768_at      | 339.84  | 397.80  | 0.238 | -1.17 |
| PA3769_guaA_at | 670.24  | 850.53  | 0.087 | -1.27 |
| PA3770_guaB_at | 685.82  | 797.18  | 0.151 | -1.16 |
| PA3771_at      | 6.54    | 4.55    | 1.000 | 1.44  |
| PA3772_at      | 10.88   | 10.85   | 0.817 | 1.00  |
| PA3773_at      | 22.28   | 11.95   | 0.151 | 1.86  |
| PA3774_at      | 17.46   | 14.05   | 0.635 | 1.24  |
| PA3775_at      | 8.98    | 9.70    | 0.643 | -1.08 |
| PA3776_at      | 22.24   | 31.58   | 0.087 | -1.42 |
| PA3777_xseA_at | 141.22  | 94.18   | 0.008 | 1.50  |
| PA3778_at      | 44.04   | 50.28   | 0.238 | -1.14 |
| PA3779_at      | 212.10  | 114.18  | 0.008 | 1.86  |
| PA3780_at      | 74.52   | 39.95   | 0.024 | 1.87  |

## Supplementary Table 1. Probe set signal data for experimental and control samples

|                |         |         |       |       |
|----------------|---------|---------|-------|-------|
| PA3781_at      | 79.50   | 46.97   | 0.008 | 1.69  |
| PA3782_at      | 37.58   | 30.43   | 0.817 | 1.23  |
| PA3783_at      | 39.46   | 32.47   | 0.349 | 1.22  |
| PA3784_at      | 76.92   | 73.05   | 1.000 | 1.05  |
| PA3785_at      | 108.86  | 109.23  | 0.643 | -1.00 |
| PA3786_at      | 151.68  | 93.75   | 0.008 | 1.62  |
| PA3787_at      | 232.26  | 103.57  | 0.008 | 2.24  |
| PA3788_at      | 59.84   | 51.22   | 0.643 | 1.17  |
| PA3789_at      | 25.20   | 20.90   | 0.484 | 1.21  |
| PA3790_oprC_at | 163.16  | 108.43  | 0.048 | 1.50  |
| PA3791_at      | 80.18   | 77.55   | 0.817 | 1.03  |
| PA3792_leuA_at | 445.54  | 311.85  | 0.008 | 1.43  |
| PA3793_at      | 136.26  | 176.00  | 0.024 | -1.29 |
| PA3794_at      | 142.26  | 172.07  | 0.087 | -1.21 |
| PA3795_at      | 101.52  | 61.88   | 0.087 | 1.64  |
| PA3796_at      | 74.20   | 75.55   | 1.000 | -1.02 |
| PA3797_at      | 180.64  | 159.68  | 0.349 | 1.13  |
| PA3798_at      | 179.46  | 172.83  | 0.643 | 1.04  |
| PA3799_at      | 173.94  | 295.80  | 0.008 | -1.70 |
| PA3800_at      | 342.28  | 545.40  | 0.008 | -1.59 |
| PA3801_at      | 1021.46 | 975.13  | 0.484 | 1.05  |
| PA3802_hisS_at | 468.08  | 591.13  | 0.048 | -1.26 |
| PA3803_at      | 612.50  | 656.92  | 0.238 | -1.07 |
| PA3804_at      | 331.88  | 344.73  | 0.643 | -1.04 |
| PA3805_pilF_at | 116.00  | 143.63  | 0.087 | -1.24 |
| PA3806_at      | 976.20  | 1019.28 | 0.484 | -1.04 |
| PA3807_ndk_at  | 1949.36 | 1995.23 | 0.817 | -1.02 |
| PA3808_at      | 123.58  | 243.98  | 0.008 | -1.97 |
| PA3809_fdx2_at | 202.62  | 330.95  | 0.048 | -1.63 |
| PA3810_hscA_at | 122.52  | 168.00  | 0.024 | -1.37 |
| PA3811_hscB_at | 288.06  | 413.35  | 0.008 | -1.43 |
| PA3812_iscA_at | 878.40  | 1042.08 | 0.024 | -1.19 |
| PA3813_iscU_at | 496.36  | 664.80  | 0.008 | -1.34 |
| PA3814_iscS_at | 1392.24 | 1480.57 | 0.024 | -1.06 |
| PA3815_at      | 1031.14 | 822.22  | 0.087 | 1.25  |
| PA3816_cysE_at | 203.14  | 202.05  | 0.817 | 1.01  |
| PA3817_at      | 90.32   | 114.75  | 0.087 | -1.27 |
| PA3818_at      | 283.10  | 484.92  | 0.008 | -1.71 |
| PA3819_at      | 294.60  | 241.10  | 0.151 | 1.22  |
| PA3820_secF_at | 301.76  | 392.70  | 0.008 | -1.30 |
| PA3821_secD_at | 886.66  | 1009.88 | 0.151 | -1.14 |
| PA3822_at      | 1226.26 | 1367.68 | 0.024 | -1.12 |
| PA3823_tgt_at  | 171.88  | 254.83  | 0.008 | -1.48 |
| PA3824_queA_at | 202.84  | 250.10  | 0.024 | -1.23 |
| PA3825_at      | 8.16    | 14.68   | 0.087 | -1.80 |
| PA3826_at      | 32.54   | 41.65   | 0.040 | -1.28 |
| PA3827_at      | 167.48  | 204.07  | 0.048 | -1.22 |
| PA3828_at      | 281.06  | 318.17  | 0.087 | -1.13 |
| PA3829_at      | 16.50   | 9.32    | 0.151 | 1.77  |
| PA3830_at      | 26.32   | 21.47   | 0.190 | 1.23  |
| PA3831_pepA_at | 610.70  | 512.05  | 0.238 | 1.19  |

**Supplementary Table 1. Probe set signal data for experimental and control samples**

|                 |        |        |       |       |
|-----------------|--------|--------|-------|-------|
| PA3832_holC_at  | 225.80 | 183.73 | 0.048 | 1.23  |
| PA3833_at       | 306.00 | 330.75 | 0.349 | -1.08 |
| PA3834_valS_at  | 775.32 | 905.40 | 0.008 | -1.17 |
| PA3835_at       | 28.86  | 20.20  | 0.048 | 1.43  |
| PA3836_at       | 654.62 | 438.63 | 0.008 | 1.49  |
| PA3837_at       | 408.98 | 242.85 | 0.008 | 1.68  |
| PA3838_at       | 184.42 | 152.27 | 0.238 | 1.21  |
| PA3839_at       | 15.44  | 24.27  | 0.238 | -1.57 |
| PA3840_at       | 39.10  | 44.88  | 0.238 | -1.15 |
| PA3841_exoS_at  | 49.64  | 53.20  | 0.643 | -1.07 |
| PA3842_at       | 84.08  | 112.52 | 0.087 | -1.34 |
| PA3843_at       | 18.60  | 11.27  | 0.024 | 1.65  |
| PA3844_at       | 33.56  | 33.80  | 0.484 | -1.01 |
| PA3845_at       | 46.64  | 48.38  | 0.643 | -1.04 |
| PA3846_at       | 30.56  | 24.70  | 0.484 | 1.24  |
| PA3847_at       | 57.84  | 58.10  | 1.000 | -1.00 |
| PA3848_at       | 142.30 | 96.50  | 0.008 | 1.47  |
| PA3849_at       | 98.34  | 157.23 | 0.008 | -1.60 |
| PA3850_at       | 347.16 | 302.15 | 0.151 | 1.15  |
| PA3851_at       | 22.36  | 31.68  | 0.024 | -1.42 |
| PA3852_at       | 57.20  | 75.77  | 0.008 | -1.32 |
| PA3853_at       | 60.88  | 69.30  | 0.238 | -1.14 |
| PA3854_at       | 161.66 | 152.93 | 0.643 | 1.06  |
| PA3855_at       | 63.88  | 53.83  | 0.349 | 1.19  |
| PA3856_at       | 38.44  | 35.97  | 0.643 | 1.07  |
| PA3857_at       | 151.22 | 174.45 | 0.151 | -1.15 |
| PA3858_at       | 85.90  | 50.10  | 0.008 | 1.71  |
| PA3859_at       | 154.04 | 130.32 | 0.151 | 1.18  |
| PA3860_at       | 50.46  | 44.22  | 0.238 | 1.14  |
| PA3861_rhlB_at  | 371.80 | 465.05 | 0.024 | -1.25 |
| PA3862_at       | 722.76 | 463.88 | 0.008 | 1.56  |
| PA3863_at       | 211.60 | 171.00 | 0.087 | 1.24  |
| PA3864_at       | 87.04  | 121.38 | 0.008 | -1.39 |
| PA3865_at       | 138.44 | 109.75 | 0.151 | 1.26  |
| PA3866_at       | 129.64 | 58.85  | 0.008 | 2.20  |
| PA3867_at       | 20.04  | 17.10  | 0.643 | 1.17  |
| PA3868_at       | 18.28  | 14.33  | 0.643 | 1.28  |
| PA3869_at       | 15.14  | 22.40  | 0.238 | -1.48 |
| PA3870_moaA1_at | 8.32   | 10.73  | 0.643 | -1.29 |
| PA3871_at       | 11.70  | 12.38  | 0.643 | -1.06 |
| PA3872_narI_at  | 34.96  | 37.10  | 0.556 | -1.06 |
| PA3873_narJ_at  | 22.60  | 22.17  | 1.000 | 1.02  |
| PA3874_narH_at  | 10.96  | 14.10  | 0.484 | -1.29 |
| PA3875_narG_at  | 3.88   | 4.32   | 1.000 | -1.11 |
| PA3876_narK2_at | 9.56   | 11.18  | 0.643 | -1.17 |
| PA3877_narK1_at | 8.96   | 16.02  | 0.151 | -1.79 |
| PA3878_narX_at  | 92.02  | 109.90 | 0.643 | -1.19 |
| PA3879_narL_at  | 81.18  | 115.55 | 0.238 | -1.42 |
| PA3880_at       | 128.68 | 167.73 | 0.238 | -1.30 |
| PA3881_at       | 131.72 | 97.45  | 0.024 | 1.35  |
| PA3882_at       | 60.00  | 54.25  | 0.349 | 1.11  |

## Supplementary Table 1. Probe set signal data for experimental and control samples

|                 |        |         |       |       |
|-----------------|--------|---------|-------|-------|
| PA3883_at       | 68.82  | 64.85   | 0.984 | 1.06  |
| PA3884_at       | 22.32  | 16.05   | 0.238 | 1.39  |
| PA3885_at       | 13.78  | 15.13   | 0.151 | -1.10 |
| PA3886_at       | 107.30 | 72.70   | 0.008 | 1.48  |
| PA3887_nhaP_at  | 111.30 | 119.95  | 0.151 | -1.08 |
| PA3888_at       | 30.74  | 31.30   | 0.730 | -1.02 |
| PA3889_at       | 31.42  | 30.65   | 0.905 | 1.03  |
| PA3890_at       | 13.00  | 14.52   | 0.484 | -1.12 |
| PA3891_at       | 27.12  | 32.92   | 0.484 | -1.21 |
| PA3892_at       | 12.02  | 33.05   | 0.008 | -2.75 |
| PA3893_at       | 32.70  | 42.47   | 0.238 | -1.30 |
| PA3894_at       | 49.48  | 63.28   | 0.048 | -1.28 |
| PA3895_at       | 140.42 | 140.43  | 0.484 | -1.00 |
| PA3896_at       | 123.30 | 105.93  | 0.349 | 1.16  |
| PA3897_at       | 4.66   | 2.20    | 0.048 | 2.12  |
| PA3898_at       | 66.74  | 67.22   | 1.000 | -1.01 |
| PA3899_at       | 30.40  | 31.80   | 0.643 | -1.05 |
| PA3900_at       | 8.16   | 31.13   | 0.008 | -3.81 |
| PA3901_fecA_at  | 438.82 | 205.20  | 0.008 | 2.14  |
| PA3902_at       | 87.42  | 86.57   | 1.000 | 1.01  |
| PA3903_prfC_at  | 449.16 | 545.13  | 0.048 | -1.21 |
| PA3904_i_at     | 816.82 | 1219.27 | 0.008 | -1.49 |
| PA3905_at       | 136.50 | 200.60  | 0.008 | -1.47 |
| PA3906_at       | 471.30 | 518.33  | 0.484 | -1.10 |
| PA3907_at       | 367.28 | 465.00  | 0.008 | -1.27 |
| PA3908_at       | 130.72 | 189.82  | 0.008 | -1.45 |
| PA3909_at       | 16.58  | 12.10   | 0.817 | 1.37  |
| PA3910_at       | 16.18  | 11.58   | 0.151 | 1.40  |
| PA3911_at       | 43.04  | 47.28   | 0.643 | -1.10 |
| PA3912_at       | 21.58  | 26.38   | 0.643 | -1.22 |
| PA3913_at       | 21.14  | 44.35   | 0.024 | -2.10 |
| PA3914_moeA1_at | 10.76  | 1.55    | 0.238 | 6.94  |
| PA3915_moaB1_at | 8.86   | 19.02   | 0.087 | -2.15 |
| PA3916_moaE_at  | 76.02  | 98.03   | 0.048 | -1.29 |
| PA3917_moaD_at  | 153.18 | 125.83  | 0.048 | 1.22  |
| PA3918_moaC_at  | 283.58 | 253.05  | 0.238 | 1.12  |
| PA3919_at       | 46.96  | 34.53   | 0.087 | 1.36  |
| PA3920_at       | 16.98  | 16.20   | 0.556 | 1.05  |
| PA3921_at       | 63.72  | 34.85   | 0.008 | 1.83  |
| PA3922_at       | 92.94  | 47.58   | 0.008 | 1.95  |
| PA3923_at       | 150.04 | 46.17   | 0.008 | 3.25  |
| PA3924_at       | 63.50  | 37.50   | 0.008 | 1.69  |
| PA3925_at       | 106.66 | 146.38  | 0.008 | -1.37 |
| PA3926_at       | 10.00  | 10.92   | 0.238 | -1.09 |
| PA3927_at       | 12.52  | 10.88   | 0.151 | 1.15  |
| PA3928_r_at     | 18.66  | 18.85   | 1.000 | -1.01 |
| PA3929_cioB_at  | 19.62  | 20.95   | 0.905 | -1.07 |
| PA3930_cioA_at  | 56.00  | 47.60   | 0.238 | 1.18  |
| PA3931_at       | 80.52  | 141.80  | 0.817 | -1.76 |
| PA3932_at       | 16.76  | 23.13   | 0.286 | -1.38 |
| PA3933_at       | 9.98   | 18.15   | 0.008 | -1.82 |

**Supplementary Table 1. Probe set signal data for experimental and control samples**

|                |         |         |       |       |
|----------------|---------|---------|-------|-------|
| PA3934_at      | 57.60   | 83.95   | 0.048 | -1.46 |
| PA3935_tauD_at | 36.54   | 29.92   | 0.087 | 1.22  |
| PA3936_at      | 20.84   | 20.50   | 0.817 | 1.02  |
| PA3937_at      | 22.02   | 23.03   | 1.000 | -1.05 |
| PA3938_at      | 25.12   | 25.52   | 1.000 | -1.02 |
| PA3939_at      | 20.36   | 13.02   | 0.151 | 1.56  |
| PA3940_at      | 854.58  | 1516.23 | 0.008 | -1.77 |
| PA3941_at      | 55.50   | 80.18   | 0.008 | -1.44 |
| PA3942_tesB_at | 166.84  | 178.55  | 0.484 | -1.07 |
| PA3943_at      | 56.94   | 53.17   | 0.817 | 1.07  |
| PA3944_at      | 82.24   | 68.55   | 0.087 | 1.20  |
| PA3945_at      | 65.20   | 40.50   | 0.048 | 1.61  |
| PA3946_at      | 14.08   | 16.48   | 0.349 | -1.17 |
| PA3947_at      | 23.38   | 24.25   | 0.817 | -1.04 |
| PA3948_at      | 44.36   | 77.13   | 0.008 | -1.74 |
| PA3949_at      | 115.92  | 95.73   | 0.349 | 1.21  |
| PA3950_at      | 158.90  | 160.27  | 0.817 | -1.01 |
| PA3951_at      | 87.32   | 86.80   | 0.643 | 1.01  |
| PA3952_at      | 141.90  | 95.38   | 0.151 | 1.49  |
| PA3953_at      | 45.64   | 28.47   | 0.048 | 1.60  |
| PA3954_at      | 22.66   | 18.55   | 0.151 | 1.22  |
| PA3955_at      | 78.70   | 79.95   | 0.643 | -1.02 |
| PA3956_at      | 30.28   | 26.52   | 0.484 | 1.14  |
| PA3957_at      | 2.96    | 5.07    | 0.151 | -1.71 |
| PA3958_at      | 67.00   | 68.07   | 1.000 | -1.02 |
| PA3959_at      | 49.84   | 32.15   | 0.008 | 1.55  |
| PA3960_at      | 54.00   | 38.25   | 0.063 | 1.41  |
| PA3961_at      | 97.42   | 97.30   | 1.000 | 1.00  |
| PA3962_at      | 197.16  | 214.20  | 0.349 | -1.09 |
| PA3963_at      | 24.08   | 20.00   | 0.230 | 1.20  |
| PA3964_at      | 19.26   | 12.90   | 0.087 | 1.49  |
| PA3965_at      | 83.74   | 123.92  | 0.024 | -1.48 |
| PA3966_at      | 132.34  | 204.73  | 0.008 | -1.55 |
| PA3967_at      | 92.82   | 233.88  | 0.008 | -2.52 |
| PA3968_at      | 58.58   | 56.72   | 0.817 | 1.03  |
| PA3969_at      | 91.92   | 61.78   | 0.008 | 1.49  |
| PA3970_amn_at  | 181.24  | 155.20  | 0.151 | 1.17  |
| PA3971_at      | 21.00   | 17.95   | 0.151 | 1.17  |
| PA3972_at      | 65.84   | 63.65   | 0.643 | 1.03  |
| PA3973_at      | 63.24   | 48.28   | 0.151 | 1.31  |
| PA3974_at      | 32.16   | 32.33   | 0.238 | -1.01 |
| PA3975_thiD_at | 676.22  | 478.17  | 0.008 | 1.41  |
| PA3976_thiE_at | 652.16  | 583.53  | 0.151 | 1.12  |
| PA3977_hemL_at | 1432.28 | 1094.80 | 0.008 | 1.31  |
| PA3978_at      | 252.70  | 295.25  | 0.484 | -1.17 |
| PA3979_at      | 48.36   | 85.85   | 0.008 | -1.78 |
| PA3980_at      | 497.88  | 534.23  | 0.484 | -1.07 |
| PA3981_at      | 534.08  | 534.25  | 1.000 | -1.00 |
| PA3982_at      | 583.18  | 502.75  | 0.008 | 1.16  |
| PA3983_at      | 33.28   | 62.65   | 0.008 | -1.88 |
| PA3984_lnt_at  | 111.54  | 116.75  | 0.349 | -1.05 |

### Supplementary Table 1. Probe set signal data for experimental and control samples

|                 |         |         |       |       |
|-----------------|---------|---------|-------|-------|
| PA3985_at       | 25.68   | 22.98   | 0.643 | 1.12  |
| PA3986_at       | 14.38   | 16.75   | 0.238 | -1.16 |
| PA3987_leuS_at  | 831.70  | 791.03  | 0.643 | 1.05  |
| PA3988_at       | 1170.44 | 915.42  | 0.008 | 1.28  |
| PA3989_holA_at  | 299.06  | 332.97  | 1.000 | -1.11 |
| PA3990_at       | 74.70   | 73.53   | 0.817 | 1.02  |
| PA3991_at       | 6.20    | 5.60    | 0.484 | 1.11  |
| PA3992_at       | 125.40  | 107.43  | 0.063 | 1.17  |
| PA3994_at       | 12.28   | 6.03    | 0.008 | 2.04  |
| PA3995_at       | 16.94   | 22.98   | 0.151 | -1.36 |
| PA3996_lipA_at  | 248.92  | 300.27  | 0.048 | -1.21 |
| PA3997_lipB_at  | 411.92  | 319.95  | 0.008 | 1.29  |
| PA3998_at       | 619.18  | 587.67  | 0.484 | 1.05  |
| PA3999_dacC_at  | 1196.14 | 1123.15 | 0.349 | 1.06  |
| PA4000_at       | 181.90  | 196.95  | 0.349 | -1.08 |
| PA4001_mltB2_at | 228.18  | 220.10  | 0.643 | 1.04  |
| PA4002_rodA_at  | 115.08  | 106.60  | 0.238 | 1.08  |
| PA4003_pbpA_at  | 149.26  | 136.90  | 0.238 | 1.09  |
| PA4004_at       | 451.32  | 441.30  | 0.484 | 1.02  |
| PA4005_at       | 239.52  | 308.70  | 0.008 | -1.29 |
| PA4006_at       | 541.64  | 558.50  | 0.817 | -1.03 |
| PA4007_proA_at  | 444.84  | 508.60  | 0.048 | -1.14 |
| PA4008_at       | 14.26   | 11.68   | 0.484 | 1.22  |
| PA4009_at       | 15.10   | 10.32   | 0.024 | 1.46  |
| PA4010_at       | 314.36  | 319.08  | 0.643 | -1.02 |
| PA4011_at       | 199.54  | 228.00  | 0.024 | -1.14 |
| PA4012_at       | 80.58   | 87.05   | 0.349 | -1.08 |
| PA4013_at       | 59.58   | 63.00   | 0.643 | -1.06 |
| PA4014_at       | 184.84  | 164.50  | 0.286 | 1.12  |
| PA4015_at       | 315.00  | 230.68  | 0.008 | 1.37  |
| PA4016_at       | 31.46   | 24.98   | 0.238 | 1.26  |
| PA4017_at       | 88.86   | 80.72   | 0.817 | 1.10  |
| PA4018_r_at     | 40.44   | 38.45   | 1.000 | 1.05  |
| PA4019_at       | 123.72  | 138.78  | 0.048 | -1.12 |
| PA4020_mpl_at   | 338.46  | 286.28  | 0.008 | 1.18  |
| PA4021_at       | 75.98   | 47.97   | 0.008 | 1.58  |
| PA4023_at       | 284.94  | 162.63  | 0.024 | 1.75  |
| PA4024_eutB_at  | 527.40  | 332.55  | 0.024 | 1.59  |
| PA4025_r_at     | 240.44  | 157.93  | 0.008 | 1.52  |
| PA4026_at       | 63.38   | 57.55   | 0.484 | 1.10  |
| PA4027_at       | 47.56   | 45.80   | 0.643 | 1.04  |
| PA4028_i_at     | 22.68   | 26.50   | 0.484 | -1.17 |
| PA4029_at       | 318.42  | 311.85  | 0.817 | 1.02  |
| PA4030_at       | 343.76  | 294.10  | 0.008 | 1.17  |
| PA4031_ppa_at   | 1586.76 | 2055.98 | 0.008 | -1.30 |
| PA4032_at       | 78.30   | 90.52   | 0.087 | -1.16 |
| PA4033_at       | 11.68   | 11.50   | 0.817 | 1.02  |
| PA4034_aqpZ_at  | 5.70    | 15.15   | 0.087 | -2.66 |
| PA4035_at       | 147.84  | 104.92  | 0.008 | 1.41  |
| PA4036_at       | 26.70   | 30.27   | 0.643 | -1.13 |
| PA4037_at       | 28.34   | 20.98   | 0.190 | 1.35  |

**Supplementary Table 1. Probe set signal data for experimental and control samples**

|                |         |         |       |       |
|----------------|---------|---------|-------|-------|
| PA4038_at      | 16.58   | 9.85    | 0.087 | 1.68  |
| PA4039_at      | 15.16   | 15.57   | 0.817 | -1.03 |
| PA4040_at      | 36.64   | 23.08   | 0.048 | 1.59  |
| PA4041_at      | 14.32   | 3.85    | 0.024 | 3.72  |
| PA4042_xseB_at | 777.80  | 469.08  | 0.008 | 1.66  |
| PA4043_ispA_at | 396.22  | 287.38  | 0.008 | 1.38  |
| PA4044_dxs_at  | 333.42  | 346.72  | 0.643 | -1.04 |
| PA4045_at      | 110.10  | 90.47   | 0.151 | 1.22  |
| PA4046_at      | 63.24   | 80.63   | 0.048 | -1.27 |
| PA4047_ribA_at | 282.32  | 291.93  | 0.817 | -1.03 |
| PA4048_at      | 48.60   | 44.65   | 0.484 | 1.09  |
| PA4049_at      | 116.92  | 112.07  | 0.643 | 1.04  |
| PA4050_pgpA_at | 111.76  | 171.02  | 0.008 | -1.53 |
| PA4051_thiL_at | 286.92  | 317.83  | 0.151 | -1.11 |
| PA4052_nusB_at | 435.14  | 496.45  | 0.349 | -1.14 |
| PA4053_ribE_at | 779.50  | 1047.72 | 0.008 | -1.34 |
| PA4054_ribB_at | 835.60  | 766.78  | 0.238 | 1.09  |
| PA4055_ribC_at | 346.70  | 363.85  | 0.349 | -1.05 |
| PA4056_ribD_at | 189.84  | 189.80  | 1.000 | 1.00  |
| PA4057_at      | 709.72  | 460.00  | 0.008 | 1.54  |
| PA4058_at      | 243.22  | 211.25  | 0.349 | 1.15  |
| PA4059_at      | 376.38  | 362.78  | 0.643 | 1.04  |
| PA4060_at      | 142.20  | 202.90  | 0.024 | -1.43 |
| PA4061_at      | 597.10  | 495.15  | 0.048 | 1.21  |
| PA4062_at      | 7.50    | 11.75   | 0.151 | -1.57 |
| PA4063_at      | 85.94   | 58.05   | 0.008 | 1.48  |
| PA4064_at      | 35.16   | 27.80   | 0.151 | 1.26  |
| PA4065_at      | 25.78   | 37.65   | 0.349 | -1.46 |
| PA4066_at      | 25.38   | 29.22   | 0.238 | -1.15 |
| PA4067_oprG_at | 1062.64 | 1244.40 | 0.349 | -1.17 |
| PA4068_at      | 131.62  | 77.88   | 0.008 | 1.69  |
| PA4069_at      | 373.76  | 263.98  | 0.008 | 1.42  |
| PA4070_at      | 12.96   | 9.40    | 0.643 | 1.38  |
| PA4071_at      | 2.22    | 3.70    | 0.484 | -1.67 |
| PA4072_at      | 12.26   | 10.32   | 0.643 | 1.19  |
| PA4073_at      | 40.80   | 44.52   | 0.643 | -1.09 |
| PA4074_at      | 4.12    | 7.68    | 0.087 | -1.86 |
| PA4075_at      | 34.50   | 28.33   | 0.190 | 1.22  |
| PA4076_at      | 47.54   | 58.07   | 0.111 | -1.22 |
| PA4077_at      | 22.24   | 25.85   | 0.484 | -1.16 |
| PA4078_at      | 19.74   | 14.23   | 0.286 | 1.39  |
| PA4079_at      | 105.36  | 109.90  | 0.817 | -1.04 |
| PA4080_at      | 13.26   | 15.85   | 0.151 | -1.20 |
| PA4081_at      | 4.44    | 11.70   | 0.024 | -2.64 |
| PA4082_at      | 11.60   | 8.55    | 0.349 | 1.36  |
| PA4083_at      | 8.24    | 17.08   | 0.024 | -2.07 |
| PA4084_at      | 4.00    | 3.15    | 1.000 | 1.27  |
| PA4085_at      | 4.62    | 5.92    | 0.238 | -1.28 |
| PA4086_at      | 20.00   | 33.88   | 0.008 | -1.69 |
| PA4087_at      | 15.04   | 18.63   | 0.817 | -1.24 |
| PA4088_at      | 13.24   | 11.80   | 1.000 | 1.12  |



**Supplementary Table 1. Probe set signal data for experimental and control samples**

|                |        |        |       |       |
|----------------|--------|--------|-------|-------|
| PA4089_at      | 2.26   | 2.83   | 0.825 | -1.25 |
| PA4090_at      | 163.38 | 205.55 | 0.151 | -1.26 |
| PA4091_hpaA_at | 13.74  | 22.85  | 0.087 | -1.66 |
| PA4092_hpaC_at | 12.88  | 10.32  | 0.643 | 1.25  |
| PA4093_at      | 18.62  | 9.30   | 0.087 | 2.00  |
| PA4094_at      | 87.10  | 55.22  | 0.008 | 1.58  |
| PA4095_at      | 22.36  | 20.13  | 0.817 | 1.11  |
| PA4096_at      | 1.82   | 7.65   | 0.008 | -4.20 |
| PA4097_at      | 18.34  | 18.45  | 1.000 | -1.01 |
| PA4098_at      | 23.78  | 15.25  | 0.238 | 1.56  |
| PA4099_at      | 17.38  | 7.65   | 0.048 | 2.27  |
| PA4100_at      | 14.88  | 16.95  | 0.643 | -1.14 |
| PA4101_at      | 61.64  | 45.67  | 0.087 | 1.35  |
| PA4102_at      | 51.14  | 46.45  | 0.643 | 1.10  |
| PA4103_at      | 5.68   | 8.63   | 0.230 | -1.52 |
| PA4104_at      | 35.94  | 27.75  | 0.151 | 1.30  |
| PA4105_at      | 4.66   | 7.90   | 0.238 | -1.70 |
| PA4106_at      | 16.18  | 12.58  | 0.643 | 1.29  |
| PA4107_at      | 23.74  | 18.98  | 0.484 | 1.25  |
| PA4108_at      | 34.62  | 25.93  | 0.238 | 1.34  |
| PA4109_ampR_at | 76.36  | 70.50  | 0.817 | 1.08  |
| PA4110_ampC_at | 48.46  | 42.38  | 0.556 | 1.14  |
| PA4111_i_at    | 84.66  | 69.77  | 0.151 | 1.21  |
| PA4112_at      | 31.70  | 27.88  | 0.635 | 1.14  |
| PA4113_at      | 31.48  | 36.38  | 0.349 | -1.16 |
| PA4114_at      | 78.30  | 79.30  | 0.643 | -1.01 |
| PA4115_at      | 202.62 | 157.73 | 0.008 | 1.28  |
| PA4116_at      | 234.66 | 191.03 | 0.008 | 1.23  |
| PA4117_at      | 75.68  | 86.28  | 0.238 | -1.14 |
| PA4118_at      | 60.58  | 62.97  | 0.484 | -1.04 |
| PA4119_aph_at  | 46.52  | 65.48  | 0.008 | -1.41 |
| PA4120_at      | 14.40  | 20.67  | 0.151 | -1.44 |
| PA4121_at      | 41.90  | 62.78  | 0.048 | -1.50 |
| PA4122_at      | 32.60  | 33.00  | 0.817 | -1.01 |
| PA4123_hpcC_at | 22.10  | 33.48  | 0.016 | -1.51 |
| PA4124_hpcB_at | 13.82  | 28.20  | 0.008 | -2.04 |
| PA4125_hpcD_at | 36.64  | 35.10  | 0.817 | 1.04  |
| PA4126_at      | 12.78  | 16.75  | 0.238 | -1.31 |
| PA4127_hpcG_at | 12.98  | 11.05  | 0.810 | 1.17  |
| PA4128_at      | 9.68   | 21.88  | 0.024 | -2.26 |
| PA4129_at      | 21.30  | 31.08  | 0.349 | -1.46 |
| PA4130_at      | 57.30  | 80.55  | 0.238 | -1.41 |
| PA4131_at      | 175.70 | 358.40 | 0.087 | -2.04 |
| PA4132_at      | 33.04  | 71.30  | 0.048 | -2.16 |
| PA4133_at      | 46.84  | 106.58 | 0.024 | -2.28 |
| PA4134_i_at    | 10.24  | 12.05  | 0.476 | -1.18 |
| PA4135_at      | 77.08  | 133.40 | 0.008 | -1.73 |
| PA4136_at      | 23.78  | 29.80  | 0.349 | -1.25 |
| PA4137_at      | 6.96   | 4.28   | 0.643 | 1.63  |
| PA4138_tyrS_at | 52.10  | 55.73  | 0.817 | -1.07 |
| PA4139_at      | 18.26  | 25.63  | 0.087 | -1.40 |

### Supplementary Table 1. Probe set signal data for experimental and control samples

|                 |        |        |       |       |
|-----------------|--------|--------|-------|-------|
| PA4140_at       | 6.02   | 21.45  | 0.008 | -3.56 |
| PA4141_at       | 39.98  | 83.30  | 0.008 | -2.08 |
| PA4142_at       | 26.00  | 27.93  | 0.484 | -1.07 |
| PA4143_at       | 11.62  | 22.40  | 0.087 | -1.93 |
| PA4144_at       | 6.30   | 9.32   | 0.349 | -1.48 |
| PA4145_at       | 34.56  | 32.18  | 0.817 | 1.07  |
| PA4146_at       | 22.18  | 15.33  | 0.151 | 1.45  |
| PA4147_acoR_at  | 10.74  | 14.20  | 0.484 | -1.32 |
| PA4148_at       | 6.12   | 9.45   | 0.238 | -1.54 |
| PA4149_at       | 14.80  | 9.75   | 0.238 | 1.52  |
| PA4150_at       | 20.84  | 15.17  | 0.484 | 1.37  |
| PA4151_acoB_at  | 6.40   | 10.05  | 0.413 | -1.57 |
| PA4152_at       | 19.42  | 19.00  | 1.000 | 1.02  |
| PA4153_at       | 3.78   | 7.70   | 0.087 | -2.04 |
| PA4154_at       | 62.04  | 41.00  | 0.143 | 1.51  |
| PA4155_at       | 22.64  | 16.20  | 0.190 | 1.40  |
| PA4156_at       | 3.22   | 16.32  | 0.008 | -5.07 |
| PA4157_at       | 53.80  | 54.72  | 0.817 | -1.02 |
| PA4158_fepC_at  | 6.20   | 3.83   | 0.643 | 1.62  |
| PA4159_fepB_at  | 22.02  | 15.13  | 0.238 | 1.46  |
| PA4160_fepD_at  | 8.50   | 13.15  | 0.349 | -1.55 |
| PA4161_fepG_at  | 13.38  | 16.03  | 0.817 | -1.20 |
| PA4162_at       | 81.48  | 50.88  | 0.008 | 1.60  |
| PA4163_at       | 486.34 | 376.88 | 0.008 | 1.29  |
| PA4164_at       | 125.04 | 133.17 | 0.643 | -1.07 |
| PA4165_at       | 23.06  | 18.15  | 0.151 | 1.27  |
| PA4166_at       | 14.24  | 14.05  | 1.000 | 1.01  |
| PA4167_at       | 5.02   | 4.05   | 0.476 | 1.24  |
| PA4168_at       | 23.90  | 16.80  | 0.048 | 1.42  |
| PA4169_at       | 10.66  | 11.57  | 0.484 | -1.09 |
| PA4170_at       | 14.78  | 18.35  | 0.817 | -1.24 |
| PA4171_at       | 17.88  | 27.98  | 0.151 | -1.56 |
| PA4172_at       | 16.86  | 16.35  | 1.000 | 1.03  |
| PA4173_at       | 11.14  | 18.55  | 0.024 | -1.67 |
| PA4174_at       | 36.20  | 27.73  | 0.151 | 1.31  |
| PA4175_at       | 68.82  | 75.00  | 0.484 | -1.09 |
| PA4176_ppiC2_at | 197.74 | 242.82 | 0.048 | -1.23 |
| PA4177_at       | 11.44  | 19.08  | 0.087 | -1.67 |
| PA4178_at       | 12.30  | 23.13  | 0.048 | -1.88 |
| PA4179_at       | 6.62   | 40.08  | 0.008 | -6.05 |
| PA4180_at       | 171.52 | 125.53 | 0.008 | 1.37  |
| PA4181_at       | 139.12 | 80.18  | 0.008 | 1.74  |
| PA4182_at       | 134.86 | 86.70  | 0.008 | 1.56  |
| PA4183_at       | 27.16  | 30.40  | 0.413 | -1.12 |
| PA4184_at       | 57.30  | 46.42  | 0.151 | 1.23  |
| PA4185_at       | 136.44 | 123.77 | 0.008 | 1.10  |
| PA4186_at       | 21.74  | 26.02  | 0.484 | -1.20 |
| PA4187_at       | 6.66   | 9.85   | 0.341 | -1.48 |
| PA4188_at       | 20.96  | 14.20  | 0.048 | 1.48  |
| PA4189_at       | 8.18   | 5.60   | 0.349 | 1.46  |
| PA4190_at       | 192.04 | 145.13 | 0.008 | 1.32  |

**Supplementary Table 1. Probe set signal data for experimental and control samples**

|                |         |         |       |       |
|----------------|---------|---------|-------|-------|
| PA4191_at      | 18.90   | 24.60   | 0.151 | -1.30 |
| PA4192_at      | 16.68   | 28.47   | 0.087 | -1.71 |
| PA4193_at      | 12.82   | 25.52   | 0.151 | -1.99 |
| PA4194_at      | 4.08    | 20.30   | 0.024 | -4.98 |
| PA4195_at      | 22.30   | 47.30   | 0.024 | -2.12 |
| PA4196_at      | 52.04   | 48.60   | 0.643 | 1.07  |
| PA4197_at      | 40.44   | 38.00   | 0.484 | 1.06  |
| PA4198_at      | 123.50  | 90.57   | 0.087 | 1.36  |
| PA4199_at      | 221.22  | 95.72   | 0.008 | 2.31  |
| PA4200_at      | 47.96   | 59.45   | 0.349 | -1.24 |
| PA4201_ddlA_at | 45.04   | 36.63   | 0.032 | 1.23  |
| PA4202_at      | 42.22   | 48.35   | 0.238 | -1.15 |
| PA4203_at      | 25.18   | 26.42   | 1.000 | -1.05 |
| PA4204_at      | 53.50   | 53.60   | 0.817 | -1.00 |
| PA4205_at      | 11.06   | 22.15   | 0.024 | -2.00 |
| PA4206_at      | 37.26   | 28.25   | 0.349 | 1.32  |
| PA4207_at      | 27.46   | 28.73   | 0.643 | -1.05 |
| PA4208_at      | 29.82   | 37.63   | 0.048 | -1.26 |
| PA4209_at      | 33.38   | 31.35   | 0.817 | 1.06  |
| PA4210_s_at    | 7.86    | 8.25    | 0.817 | -1.05 |
| PA4211_g_at    | 69.78   | 89.57   | 0.238 | -1.28 |
| PA4217_at      | 64.52   | 69.13   | 0.484 | -1.07 |
| PA4218_at      | 76.72   | 202.15  | 0.008 | -2.63 |
| PA4219_at      | 34.88   | 88.53   | 0.008 | -2.54 |
| PA4220_i_at    | 93.82   | 180.85  | 0.008 | -1.93 |
| PA4221_fptA_at | 154.60  | 417.85  | 0.008 | -2.70 |
| PA4222_at      | 86.22   | 182.30  | 0.008 | -2.11 |
| PA4223_at      | 95.32   | 247.35  | 0.008 | -2.59 |
| PA4224_at      | 108.04  | 262.38  | 0.008 | -2.43 |
| PA4225_pchF_at | 42.06   | 138.98  | 0.008 | -3.30 |
| PA4226_pchE_at | 103.26  | 262.97  | 0.008 | -2.55 |
| PA4227_pchR_at | 48.00   | 50.65   | 0.643 | -1.06 |
| PA4228_pchD_at | 101.10  | 235.10  | 0.008 | -2.33 |
| PA4229_pchC_at | 101.20  | 267.57  | 0.008 | -2.64 |
| PA4230_pchB_at | 49.60   | 212.05  | 0.008 | -4.28 |
| PA4231_pchA_at | 35.62   | 102.60  | 0.008 | -2.88 |
| PA4232_ssb_at  | 1404.06 | 1334.25 | 0.238 | 1.05  |
| PA4233_at      | 153.48  | 152.98  | 0.643 | 1.00  |
| PA4234_uvrA_at | 566.02  | 472.53  | 0.024 | 1.20  |
| PA4235_bfrA_at | 337.92  | 423.70  | 0.087 | -1.25 |
| PA4236_katA_at | 543.84  | 275.05  | 0.008 | 1.98  |
| PA4237_rplQ_at | 3033.60 | 2430.35 | 0.151 | 1.25  |
| PA4238_rpoA_at | 5010.22 | 4699.45 | 0.238 | 1.07  |
| PA4239_rpsD_at | 2400.30 | 2721.05 | 0.087 | -1.13 |
| PA4240_rpsK_at | 3079.78 | 3477.32 | 0.087 | -1.13 |
| PA4241_rpsM_at | 3455.08 | 3729.13 | 0.151 | -1.08 |
| PA4242_rpmJ_at | 3890.50 | 4444.57 | 0.238 | -1.14 |
| PA4243_secY_at | 2101.52 | 3048.18 | 0.008 | -1.45 |
| PA4244_rplO_at | 4440.62 | 3762.63 | 0.087 | 1.18  |
| PA4245_rpmD_at | 3092.32 | 3435.60 | 0.151 | -1.11 |
| PA4246_rpsE_at | 5106.94 | 4906.97 | 0.643 | 1.04  |

### Supplementary Table 1. Probe set signal data for experimental and control samples

|                  |         |         |       |       |
|------------------|---------|---------|-------|-------|
| PA4247_rplR_at   | 4062.82 | 4190.88 | 0.643 | -1.03 |
| PA4248_rplF_at   | 4566.36 | 4002.28 | 0.151 | 1.14  |
| PA4249_rpsH_at   | 5027.46 | 4745.72 | 0.643 | 1.06  |
| PA4250_rpsN_at   | 3012.66 | 3142.75 | 0.349 | -1.04 |
| PA4251_rplE_at   | 6128.40 | 5275.95 | 0.238 | 1.16  |
| PA4252_rplX_at   | 3276.02 | 3350.40 | 0.643 | -1.02 |
| PA4253_rplN_at   | 5149.66 | 4199.85 | 0.008 | 1.23  |
| PA4254_rpsQ_at   | 6390.00 | 6072.00 | 0.484 | 1.05  |
| PA4255_rpmC_at   | 1113.52 | 1394.28 | 0.048 | -1.25 |
| PA4256_rplP_at   | 4291.40 | 3968.80 | 0.484 | 1.08  |
| PA4257_rpsC_at   | 3249.28 | 3317.20 | 0.643 | -1.02 |
| PA4258_rplV_at   | 6125.44 | 5046.80 | 0.008 | 1.21  |
| PA4259_rpsS_at   | 3069.18 | 3465.63 | 0.048 | -1.13 |
| PA4260_rplB_at   | 6447.30 | 4698.20 | 0.024 | 1.37  |
| PA4261_rplW_at   | 4185.52 | 3716.85 | 0.151 | 1.13  |
| PA4262_rplD_at   | 4233.26 | 3943.32 | 0.484 | 1.07  |
| PA4263_rplC_at   | 5144.92 | 4261.45 | 0.048 | 1.21  |
| PA4264_rpsJ_at   | 4258.80 | 4191.70 | 0.817 | 1.02  |
| PA4265_tufA_s_at | 2034.94 | 2877.58 | 0.008 | -1.41 |
| PA4266_fusA1_at  | 2720.94 | 2721.23 | 0.817 | -1.00 |
| PA4267_rpsG_at   | 5378.78 | 4245.30 | 0.024 | 1.27  |
| PA4268_rpsL_at   | 2580.60 | 3094.78 | 0.087 | -1.20 |
| PA4269_rpoC_at   | 2950.68 | 2974.10 | 0.484 | -1.01 |
| PA4270_rpoB_at   | 956.18  | 1221.22 | 0.151 | -1.28 |
| PA4271_rplL_at   | 3448.22 | 3855.50 | 0.349 | -1.12 |
| PA4272_rplJ_at   | 4671.44 | 4460.95 | 0.643 | 1.05  |
| PA4273_rplA_at   | 4555.16 | 4159.80 | 0.151 | 1.10  |
| PA4274_rplK_at   | 5438.42 | 4486.55 | 0.087 | 1.21  |
| PA4275_nusG_at   | 570.58  | 1009.13 | 0.008 | -1.77 |
| PA4276_secE_at   | 1189.90 | 1900.88 | 0.048 | -1.60 |
| PA4278_at        | 36.92   | 57.85   | 0.008 | -1.57 |
| PA4279_at        | 123.84  | 206.37  | 0.008 | -1.67 |
| PA4280_birA_at   | 237.44  | 273.58  | 0.063 | -1.15 |
| PA4281_sbcD_at   | 151.58  | 93.77   | 0.008 | 1.62  |
| PA4282_at        | 88.18   | 52.22   | 0.008 | 1.69  |
| PA4283_recD_at   | 62.76   | 61.38   | 0.484 | 1.02  |
| PA4284_recB_at   | 206.76  | 164.03  | 0.024 | 1.26  |
| PA4285_recC_at   | 107.72  | 79.38   | 0.048 | 1.36  |
| PA4286_at        | 218.16  | 175.38  | 0.008 | 1.24  |
| PA4287_at        | 14.18   | 10.23   | 0.008 | 1.39  |
| PA4288_at        | 42.52   | 28.45   | 0.008 | 1.49  |
| PA4289_at        | 31.82   | 22.83   | 0.238 | 1.39  |
| PA4290_at        | 154.66  | 99.35   | 0.151 | 1.56  |
| PA4291_at        | 55.52   | 82.00   | 0.048 | -1.48 |
| PA4292_at        | 189.24  | 333.80  | 0.008 | -1.76 |
| PA4293_at        | 16.24   | 6.58    | 0.087 | 2.47  |
| PA4294_at        | 12.26   | 17.90   | 0.048 | -1.46 |
| PA4295_at        | 6.72    | 4.85    | 0.643 | 1.39  |
| PA4296_at        | 106.02  | 76.32   | 0.087 | 1.39  |
| PA4297_at        | 3.14    | 1.85    | 0.230 | 1.70  |
| PA4298_at        | 14.56   | 10.57   | 0.484 | 1.38  |

### Supplementary Table 1. Probe set signal data for experimental and control samples

|                 |         |         |       |       |
|-----------------|---------|---------|-------|-------|
| PA4299_at       | 26.84   | 23.80   | 0.643 | 1.13  |
| PA4300_at       | 7.82    | 16.08   | 0.087 | -2.06 |
| PA4301_at       | 15.60   | 19.27   | 0.151 | -1.24 |
| PA4302_at       | 2.32    | 8.95    | 0.008 | -3.86 |
| PA4303_at       | 19.44   | 12.95   | 0.238 | 1.50  |
| PA4304_at       | 15.04   | 6.15    | 0.024 | 2.45  |
| PA4305_at       | 8.46    | 16.98   | 0.151 | -2.01 |
| PA4306_at       | 10.16   | 10.13   | 0.730 | 1.00  |
| PA4307_pctC_at  | 409.44  | 316.35  | 0.048 | 1.29  |
| PA4308_at       | 67.60   | 44.50   | 0.024 | 1.52  |
| PA4309_pctA_at  | 125.38  | 114.60  | 0.238 | 1.09  |
| PA4310_pctB_at  | 507.48  | 547.20  | 0.349 | -1.08 |
| PA4311_at       | 27.00   | 16.08   | 0.016 | 1.68  |
| PA4312_at       | 85.32   | 88.38   | 1.000 | -1.04 |
| PA4313_at       | 34.92   | 33.70   | 0.817 | 1.04  |
| PA4314_purU1_at | 349.72  | 392.27  | 0.151 | -1.12 |
| PA4315_mvaT_at  | 1272.26 | 2350.00 | 0.087 | -1.85 |
| PA4316_sbcB_at  | 119.74  | 113.50  | 1.000 | 1.05  |
| PA4317_at       | 1311.62 | 1128.07 | 0.349 | 1.16  |
| PA4318_at       | 228.92  | 195.00  | 0.238 | 1.17  |
| PA4319_at       | 91.16   | 97.70   | 0.349 | -1.07 |
| PA4320_at       | 99.68   | 86.78   | 0.349 | 1.15  |
| PA4321_at       | 274.24  | 233.10  | 0.048 | 1.18  |
| PA4322_at       | 192.66  | 244.97  | 0.151 | -1.27 |
| PA4323_at       | 189.96  | 171.13  | 0.349 | 1.11  |
| PA4324_at       | 109.82  | 85.88   | 0.238 | 1.28  |
| PA4325_at       | 111.76  | 112.83  | 1.000 | -1.01 |
| PA4326_at       | 59.42   | 59.35   | 1.000 | 1.00  |
| PA4327_at       | 37.60   | 31.20   | 0.643 | 1.21  |
| PA4328_at       | 65.60   | 62.87   | 0.484 | 1.04  |
| PA4329_pykA_at  | 1080.40 | 725.62  | 0.008 | 1.49  |
| PA4330_at       | 30.00   | 33.38   | 0.349 | -1.11 |
| PA4331_at       | 55.78   | 44.70   | 0.087 | 1.25  |
| PA4332_at       | 38.46   | 46.13   | 0.238 | -1.20 |
| PA4333_at       | 774.32  | 1114.38 | 0.008 | -1.44 |
| PA4334_at       | 30.32   | 30.85   | 1.000 | -1.02 |
| PA4335_at       | 41.66   | 25.63   | 0.008 | 1.63  |
| PA4336_at       | 227.02  | 169.55  | 0.048 | 1.34  |
| PA4337_at       | 29.12   | 24.85   | 0.349 | 1.17  |
| PA4338_at       | 23.00   | 19.58   | 0.643 | 1.17  |
| PA4339_at       | 49.32   | 38.80   | 0.151 | 1.27  |
| PA4340_at       | 101.02  | 90.27   | 0.048 | 1.12  |
| PA4341_at       | 9.04    | 5.57    | 0.643 | 1.62  |
| PA4342_at       | 21.12   | 21.08   | 0.817 | 1.00  |
| PA4343_at       | 3.36    | 2.03    | 0.024 | 1.66  |
| PA4344_at       | 19.78   | 16.88   | 0.484 | 1.17  |
| PA4345_at       | 16.88   | 16.42   | 0.341 | 1.03  |
| PA4346_at       | 7.40    | 6.47    | 0.817 | 1.14  |
| PA4347_at       | 37.68   | 35.17   | 0.484 | 1.07  |
| PA4348_at       | 130.22  | 172.98  | 0.238 | -1.33 |
| PA4349_at       | 62.20   | 39.65   | 0.008 | 1.57  |

**Supplementary Table 1. Probe set signal data for experimental and control samples**

|                 |         |         |       |       |
|-----------------|---------|---------|-------|-------|
| PA4350_at       | 19.68   | 15.65   | 0.349 | 1.26  |
| PA4351_at       | 7.02    | 7.38    | 0.817 | -1.05 |
| PA4352_at       | 76.56   | 122.35  | 0.024 | -1.60 |
| PA4353_at       | 36.54   | 34.53   | 0.643 | 1.06  |
| PA4354_at       | 56.14   | 73.88   | 0.151 | -1.32 |
| PA4355_at       | 58.20   | 58.10   | 0.817 | 1.00  |
| PA4356_xenB_at  | 89.24   | 116.47  | 0.087 | -1.31 |
| PA4357_r_at     | 44.44   | 42.42   | 0.484 | 1.05  |
| PA4358_at       | 38.36   | 54.88   | 0.087 | -1.43 |
| PA4359_i_at     | 31.38   | 39.25   | 0.151 | -1.25 |
| PA4360_at       | 605.66  | 540.42  | 0.087 | 1.12  |
| PA4361_at       | 22.56   | 25.02   | 0.484 | -1.11 |
| PA4362_at       | 18.24   | 14.47   | 0.349 | 1.26  |
| PA4363_iciA_at  | 10.04   | 19.13   | 0.008 | -1.91 |
| PA4364_at       | 26.76   | 16.98   | 0.008 | 1.58  |
| PA4365_at       | 13.20   | 10.57   | 0.413 | 1.25  |
| PA4366_sodB_at  | 1779.44 | 1923.32 | 0.484 | -1.08 |
| PA4367_at       | 63.60   | 55.00   | 0.048 | 1.16  |
| PA4368_at       | 27.62   | 29.25   | 0.151 | -1.06 |
| PA4369_at       | 39.26   | 33.03   | 0.087 | 1.19  |
| PA4370_at       | 1924.68 | 1805.90 | 1.000 | 1.07  |
| PA4371_at       | 140.62  | 186.63  | 0.087 | -1.33 |
| PA4372_at       | 477.94  | 649.17  | 0.087 | -1.36 |
| PA4373_at       | 109.34  | 139.57  | 0.087 | -1.28 |
| PA4374_at       | 85.56   | 82.02   | 0.643 | 1.04  |
| PA4375_at       | 24.28   | 25.60   | 0.817 | -1.05 |
| PA4376_pncB2_at | 138.22  | 135.18  | 0.817 | 1.02  |
| PA4377_at       | 65.88   | 47.58   | 0.048 | 1.38  |
| PA4378_inaA_at  | 46.78   | 50.33   | 0.349 | -1.08 |
| PA4379_at       | 123.56  | 89.38   | 0.048 | 1.38  |
| PA4380_at       | 44.74   | 39.35   | 0.087 | 1.14  |
| PA4381_at       | 98.58   | 89.35   | 0.238 | 1.10  |
| PA4382_at       | 19.36   | 15.80   | 0.484 | 1.23  |
| PA4383_at       | 34.34   | 32.03   | 0.643 | 1.07  |
| PA4384_at       | 31.58   | 43.13   | 0.048 | -1.37 |
| PA4385_groEL_at | 2903.34 | 2964.98 | 0.643 | -1.02 |
| PA4386_groES_at | 6642.66 | 5044.48 | 0.008 | 1.32  |
| PA4387_at       | 146.80  | 163.80  | 0.349 | -1.12 |
| PA4388_at       | 97.22   | 99.58   | 0.817 | -1.02 |
| PA4389_at       | 117.82  | 166.70  | 0.024 | -1.41 |
| PA4390_at       | 48.44   | 117.05  | 0.008 | -2.42 |
| PA4391_at       | 37.12   | 35.88   | 0.730 | 1.03  |
| PA4392_at       | 24.86   | 30.15   | 0.238 | -1.21 |
| PA4393_at       | 59.92   | 45.22   | 0.024 | 1.33  |
| PA4394_at       | 94.90   | 130.15  | 0.087 | -1.37 |
| PA4395_at       | 690.36  | 804.05  | 0.349 | -1.16 |
| PA4396_at       | 66.54   | 64.38   | 0.817 | 1.03  |
| PA4397_panE_at  | 54.66   | 52.18   | 0.643 | 1.05  |
| PA4398_at       | 76.70   | 59.35   | 0.087 | 1.29  |
| PA4399_at       | 87.10   | 90.47   | 1.000 | -1.04 |
| PA4400_at       | 90.08   | 96.77   | 0.484 | -1.07 |

### Supplementary Table 1. Probe set signal data for experimental and control samples

|                 |         |         |       |       |
|-----------------|---------|---------|-------|-------|
| PA4401_at       | 88.12   | 125.45  | 0.024 | -1.42 |
| PA4402_argJ_at  | 181.38  | 234.93  | 0.024 | -1.30 |
| PA4403_secA_at  | 580.56  | 641.83  | 0.087 | -1.11 |
| PA4404_at       | 100.82  | 93.52   | 0.349 | 1.08  |
| PA4405_at       | 31.16   | 37.15   | 0.087 | -1.19 |
| PA4406_lpxC_at  | 602.96  | 788.72  | 0.024 | -1.31 |
| PA4407_ftsZ_at  | 1133.68 | 1331.50 | 0.048 | -1.17 |
| PA4408_ftsA_at  | 302.20  | 335.93  | 0.008 | -1.11 |
| PA4409_ftsQ_at  | 351.60  | 354.67  | 1.000 | -1.01 |
| PA4410_ddlB_at  | 269.50  | 255.65  | 0.484 | 1.05  |
| PA4411_murC_at  | 422.94  | 437.23  | 0.238 | -1.03 |
| PA4412_murG_at  | 392.84  | 321.10  | 0.151 | 1.22  |
| PA4413_ftsW_at  | 284.66  | 236.23  | 0.048 | 1.21  |
| PA4414_murD_at  | 226.02  | 186.85  | 0.151 | 1.21  |
| PA4415_mraY_at  | 249.54  | 274.32  | 0.238 | -1.10 |
| PA4416_murF_at  | 360.22  | 275.95  | 0.008 | 1.31  |
| PA4417_murE_at  | 218.56  | 202.45  | 0.151 | 1.08  |
| PA4418_ftsl_at  | 123.04  | 129.00  | 0.484 | -1.05 |
| PA4419_ftsL_at  | 105.42  | 106.82  | 1.000 | -1.01 |
| PA4420_at       | 250.66  | 253.00  | 0.817 | -1.01 |
| PA4421_at       | 299.06  | 339.30  | 0.238 | -1.13 |
| PA4422_at       | 96.96   | 140.32  | 0.008 | -1.45 |
| PA4423_at       | 727.12  | 551.53  | 0.008 | 1.32  |
| PA4424_at       | 424.30  | 501.08  | 0.008 | -1.18 |
| PA4425_at       | 1008.32 | 891.40  | 0.024 | 1.13  |
| PA4426_at       | 360.44  | 406.22  | 0.087 | -1.13 |
| PA4427_sspB_at  | 107.02  | 210.47  | 0.008 | -1.97 |
| PA4428_sspA_at  | 276.04  | 516.38  | 0.008 | -1.87 |
| PA4429_at       | 596.10  | 964.70  | 0.087 | -1.62 |
| PA4430_at       | 1221.72 | 1540.03 | 0.151 | -1.26 |
| PA4431_at       | 3504.86 | 3078.35 | 0.151 | 1.14  |
| PA4432_rpsl_at  | 493.84  | 1156.88 | 0.008 | -2.34 |
| PA4433_rplM_at  | 2525.88 | 3859.70 | 0.008 | -1.53 |
| PA4434_at       | 130.58  | 115.53  | 0.643 | 1.13  |
| PA4435_at       | 16.38   | 12.25   | 0.151 | 1.34  |
| PA4436_at       | 123.76  | 96.25   | 0.484 | 1.29  |
| PA4437_at       | 20.26   | 41.97   | 0.008 | -2.07 |
| PA4438_at       | 251.06  | 371.05  | 0.008 | -1.48 |
| PA4439_trpS_at  | 317.76  | 343.42  | 0.484 | -1.08 |
| PA4440_at       | 199.58  | 181.23  | 0.238 | 1.10  |
| PA4441_at       | 1630.14 | 1649.43 | 0.817 | -1.01 |
| PA4442_cysN_at  | 259.76  | 321.85  | 0.349 | -1.24 |
| PA4443_cysD_at  | 387.74  | 616.03  | 0.008 | -1.59 |
| PA4444_mltB1_at | 92.74   | 88.40   | 0.556 | 1.05  |
| PA4445_at       | 89.38   | 87.78   | 0.643 | 1.02  |
| PA4446_algW_at  | 132.64  | 129.88  | 0.635 | 1.02  |
| PA4447_hisC1_at | 103.24  | 171.63  | 0.008 | -1.66 |
| PA4448_hisD_at  | 187.98  | 160.90  | 0.190 | 1.17  |
| PA4449_hisG_at  | 404.86  | 521.23  | 0.008 | -1.29 |
| PA4450_murA_at  | 1215.32 | 1223.22 | 0.643 | -1.01 |
| PA4451_at       | 825.58  | 892.75  | 0.484 | -1.08 |

### Supplementary Table 1. Probe set signal data for experimental and control samples

|                 |         |         |       |       |
|-----------------|---------|---------|-------|-------|
| PA4452_at       | 187.72  | 221.65  | 0.151 | -1.18 |
| PA4453_at       | 680.82  | 884.05  | 0.008 | -1.30 |
| PA4454_at       | 653.74  | 679.55  | 0.484 | -1.04 |
| PA4455_at       | 244.02  | 370.45  | 0.008 | -1.52 |
| PA4456_at       | 365.18  | 461.60  | 0.024 | -1.26 |
| PA4457_at       | 482.22  | 525.35  | 0.349 | -1.09 |
| PA4458_at       | 405.98  | 357.03  | 0.151 | 1.14  |
| PA4459_at       | 365.28  | 505.90  | 0.008 | -1.38 |
| PA4460_at       | 1295.20 | 1427.88 | 0.087 | -1.10 |
| PA4461_at       | 465.16  | 685.32  | 0.008 | -1.47 |
| PA4462_rpoN_at  | 299.82  | 379.73  | 0.008 | -1.27 |
| PA4463_at       | 534.14  | 671.80  | 0.087 | -1.26 |
| PA4464_ptsN_at  | 1230.76 | 895.97  | 0.008 | 1.37  |
| PA4465_at       | 604.68  | 659.67  | 1.000 | -1.09 |
| PA4466_at       | 255.56  | 316.40  | 0.008 | -1.24 |
| PA4467_at       | 8.26    | 13.95   | 0.048 | -1.69 |
| PA4468_sodM_at  | 27.68   | 18.75   | 0.008 | 1.48  |
| PA4469_at       | 35.74   | 36.78   | 0.817 | -1.03 |
| PA4470_fumC1_at | 37.60   | 38.53   | 0.817 | -1.02 |
| PA4471_at       | 10.76   | 12.77   | 1.000 | -1.19 |
| PA4472_pmbA_at  | 98.48   | 83.32   | 0.151 | 1.18  |
| PA4473_at       | 301.96  | 458.45  | 0.008 | -1.52 |
| PA4474_at       | 162.30  | 146.93  | 0.643 | 1.10  |
| PA4475_at       | 132.30  | 111.63  | 0.048 | 1.19  |
| PA4476_at       | 42.26   | 49.50   | 0.238 | -1.17 |
| PA4477_cafA_at  | 88.60   | 103.88  | 0.048 | -1.17 |
| PA4478_at       | 72.28   | 100.20  | 0.008 | -1.39 |
| PA4479_mreD_at  | 219.36  | 231.63  | 0.048 | -1.06 |
| PA4480_mreC_at  | 492.58  | 437.15  | 0.024 | 1.13  |
| PA4481_mreB_at  | 1143.68 | 1150.85 | 0.643 | -1.01 |
| PA4482_gatC_at  | 513.24  | 665.57  | 0.024 | -1.30 |
| PA4483_gatA_at  | 850.90  | 1077.20 | 0.008 | -1.27 |
| PA4484_gatB_at  | 863.36  | 643.00  | 0.024 | 1.34  |
| PA4485_at       | 27.06   | 34.05   | 0.151 | -1.26 |
| PA4486_at       | 44.74   | 42.50   | 0.643 | 1.05  |
| PA4487_at       | 133.70  | 150.75  | 0.349 | -1.13 |
| PA4488_at       | 62.64   | 70.52   | 0.349 | -1.13 |
| PA4489_at       | 268.98  | 326.77  | 0.151 | -1.21 |
| PA4490_at       | 408.42  | 380.92  | 0.484 | 1.07  |
| PA4491_at       | 451.62  | 288.08  | 0.024 | 1.57  |
| PA4492_at       | 670.60  | 544.13  | 0.048 | 1.23  |
| PA4493_at       | 278.60  | 222.50  | 0.048 | 1.25  |
| PA4494_at       | 55.80   | 53.13   | 0.643 | 1.05  |
| PA4495_at       | 276.30  | 336.13  | 0.238 | -1.22 |
| PA4496_at       | 432.12  | 205.43  | 0.008 | 2.10  |
| PA4497_at       | 109.24  | 61.68   | 0.008 | 1.77  |
| PA4498_at       | 76.84   | 143.10  | 0.008 | -1.86 |
| PA4499_at       | 113.94  | 124.13  | 0.238 | -1.09 |
| PA4500_at       | 343.02  | 447.75  | 0.238 | -1.31 |
| PA4501_at       | 203.32  | 207.93  | 0.817 | -1.02 |
| PA4502_at       | 292.40  | 307.52  | 1.000 | -1.05 |



**Supplementary Table 1. Probe set signal data for experimental and control samples**

|                |        |        |       |       |
|----------------|--------|--------|-------|-------|
| PA4503_at      | 122.76 | 197.03 | 0.087 | -1.61 |
| PA4504_at      | 254.16 | 227.35 | 0.484 | 1.12  |
| PA4505_at      | 116.00 | 162.95 | 0.349 | -1.40 |
| PA4506_at      | 222.38 | 249.30 | 0.484 | -1.12 |
| PA4507_at      | 49.26  | 47.62  | 0.817 | 1.03  |
| PA4508_at      | 26.00  | 28.95  | 0.238 | -1.11 |
| PA4509_at      | 17.02  | 21.80  | 0.484 | -1.28 |
| PA4510_at      | 56.30  | 44.78  | 0.151 | 1.26  |
| PA4511_at      | 116.02 | 95.05  | 0.008 | 1.22  |
| PA4512_at      | 80.26  | 92.18  | 0.151 | -1.15 |
| PA4513_at      | 32.70  | 40.50  | 0.087 | -1.24 |
| PA4514_at      | 393.50 | 175.88 | 0.087 | 2.24  |
| PA4515_at      | 189.74 | 232.70 | 0.087 | -1.23 |
| PA4516_at      | 113.92 | 95.35  | 0.484 | 1.19  |
| PA4517_at      | 25.06  | 13.73  | 0.048 | 1.83  |
| PA4518_at      | 28.42  | 32.58  | 0.484 | -1.15 |
| PA4519_at      | 108.30 | 198.88 | 0.008 | -1.84 |
| PA4520_at      | 52.10  | 36.32  | 0.008 | 1.43  |
| PA4521_at      | 59.12  | 46.25  | 0.024 | 1.28  |
| PA4522_ampD_at | 46.72  | 34.13  | 0.024 | 1.37  |
| PA4523_at      | 123.28 | 115.02 | 0.484 | 1.07  |
| PA4524_nadC_at | 70.84  | 93.50  | 0.008 | -1.32 |
| PA4525_pilA_at | 200.68 | 291.65 | 0.008 | -1.45 |
| PA4526_pilB_at | 167.58 | 110.97 | 0.024 | 1.51  |
| PA4527_pilC_at | 146.68 | 148.70 | 0.817 | -1.01 |
| PA4528_pilD_at | 351.76 | 207.70 | 0.008 | 1.69  |
| PA4529_at      | 370.56 | 292.92 | 0.008 | 1.27  |
| PA4530_at      | 181.92 | 134.50 | 0.024 | 1.35  |
| PA4531_at      | 26.16  | 27.38  | 0.484 | -1.05 |
| PA4532_at      | 55.98  | 68.88  | 0.024 | -1.23 |
| PA4533_at      | 78.76  | 57.98  | 0.008 | 1.36  |
| PA4534_at      | 62.20  | 60.18  | 1.000 | 1.03  |
| PA4535_at      | 156.48 | 93.90  | 0.008 | 1.67  |
| PA4536_at      | 149.52 | 107.13 | 0.008 | 1.40  |
| PA4537_at      | 253.04 | 280.25 | 0.643 | -1.11 |
| PA4538_ndh_at  | 195.84 | 174.88 | 0.151 | 1.12  |
| PA4539_at      | 32.82  | 43.88  | 0.151 | -1.34 |
| PA4540_at      | 19.64  | 6.15   | 0.048 | 3.19  |
| PA4541_at      | 16.28  | 20.25  | 0.817 | -1.24 |
| PA4542_clpB_at | 116.86 | 132.50 | 0.817 | -1.13 |
| PA4543_at      | 56.22  | 42.75  | 0.008 | 1.32  |
| PA4544_rluD_at | 268.60 | 246.00 | 0.151 | 1.09  |
| PA4545_comL_at | 461.00 | 688.25 | 0.008 | -1.49 |
| PA4546_pilS_at | 81.98  | 79.15  | 0.151 | 1.04  |
| PA4547_pilR_at | 141.90 | 117.28 | 0.024 | 1.21  |
| PA4548_at      | 90.44  | 109.28 | 0.063 | -1.21 |
| PA4549_fimT_at | 6.34   | 3.15   | 0.151 | 2.01  |
| PA4550_fimU_at | 58.78  | 102.88 | 0.008 | -1.75 |
| PA4551_pilV_at | 108.78 | 181.73 | 0.087 | -1.67 |
| PA4552_pilW_at | 76.40  | 129.90 | 0.024 | -1.70 |
| PA4553_pilX_at | 37.88  | 74.40  | 0.048 | -1.96 |

### Supplementary Table 1. Probe set signal data for experimental and control samples

|                 |         |         |       |       |
|-----------------|---------|---------|-------|-------|
| PA4554_pilY1_at | 100.22  | 139.13  | 0.048 | -1.39 |
| PA4555_pilY2_at | 28.78   | 85.03   | 0.008 | -2.95 |
| PA4556_pilE_at  | 97.10   | 120.78  | 0.151 | -1.24 |
| PA4557_lytB_at  | 133.60  | 161.52  | 0.111 | -1.21 |
| PA4558_at       | 796.70  | 875.83  | 0.151 | -1.10 |
| PA4559_lspA_at  | 300.94  | 344.15  | 0.087 | -1.14 |
| PA4560_ileS_at  | 299.94  | 368.33  | 0.024 | -1.23 |
| PA4561_ribF_at  | 419.78  | 358.95  | 0.151 | 1.17  |
| PA4562_at       | 87.96   | 80.55   | 0.349 | 1.09  |
| PA4563_rpsT_at  | 1600.92 | 3648.50 | 0.008 | -2.28 |
| PA4564_at       | 64.76   | 78.78   | 0.238 | -1.22 |
| PA4565_proB_at  | 392.24  | 370.67  | 0.817 | 1.06  |
| PA4566_obg_at   | 450.40  | 479.75  | 0.349 | -1.07 |
| PA4567_rpmA_at  | 1402.18 | 2335.23 | 0.008 | -1.67 |
| PA4568_rplU_at  | 4032.84 | 4282.55 | 0.817 | -1.06 |
| PA4569_ispB_at  | 563.56  | 549.47  | 0.643 | 1.03  |
| PA4570_at       | 16.12   | 30.35   | 0.048 | -1.88 |
| PA4571_at       | 89.92   | 156.82  | 0.087 | -1.74 |
| PA4572_fklB_at  | 557.86  | 660.63  | 0.238 | -1.18 |
| PA4573_at       | 34.24   | 33.22   | 0.349 | 1.03  |
| PA4574_at       | 108.00  | 170.35  | 0.008 | -1.58 |
| PA4575_at       | 37.36   | 26.38   | 0.008 | 1.42  |
| PA4576_at       | 217.58  | 193.00  | 0.008 | 1.13  |
| PA4577_at       | 61.14   | 51.85   | 0.635 | 1.18  |
| PA4578_at       | 3303.70 | 2363.07 | 0.008 | 1.40  |
| PA4579_at       | 114.76  | 94.15   | 0.008 | 1.22  |
| PA4580_at       | 66.94   | 79.35   | 0.349 | -1.19 |
| PA4581_rtcR_at  | 29.88   | 30.53   | 0.643 | -1.02 |
| PA4582_at       | 212.98  | 66.05   | 0.008 | 3.22  |
| PA4583_at       | 272.58  | 106.35  | 0.008 | 2.56  |
| PA4584_at       | 141.50  | 47.47   | 0.008 | 2.98  |
| PA4585_rtcA_at  | 135.10  | 66.55   | 0.008 | 2.03  |
| PA4586_at       | 37.82   | 19.58   | 0.008 | 1.93  |
| PA4587_ccpR_at  | 66.72   | 64.15   | 0.643 | 1.04  |
| PA4588_gdhA_at  | 40.46   | 35.42   | 0.151 | 1.14  |
| PA4589_at       | 30.48   | 28.63   | 0.484 | 1.06  |
| PA4590_pra_at   | 53.50   | 73.93   | 0.008 | -1.38 |
| PA4591_at       | 27.96   | 25.23   | 0.643 | 1.11  |
| PA4592_at       | 46.08   | 40.17   | 0.413 | 1.15  |
| PA4593_at       | 29.88   | 25.85   | 0.484 | 1.16  |
| PA4594_at       | 33.48   | 28.23   | 0.111 | 1.19  |
| PA4595_at       | 858.68  | 725.83  | 0.008 | 1.18  |
| PA4596_at       | 37.80   | 44.67   | 0.151 | -1.18 |
| PA4597_oprJ_at  | 52.82   | 56.80   | 0.643 | -1.08 |
| PA4598_mexD_at  | 18.36   | 31.17   | 0.032 | -1.70 |
| PA4599_mexC_at  | 22.38   | 26.00   | 0.151 | -1.16 |
| PA4600_nfxB_at  | 105.36  | 127.97  | 0.087 | -1.21 |
| PA4601_at       | 50.68   | 47.53   | 0.817 | 1.07  |
| PA4602_glyA3_at | 1006.08 | 1374.95 | 0.024 | -1.37 |
| PA4603_at       | 21.02   | 22.30   | 0.484 | -1.06 |
| PA4604_at       | 105.12  | 100.68  | 0.643 | 1.04  |

**Supplementary Table 1. Probe set signal data for experimental and control samples**

|                |         |        |       |       |
|----------------|---------|--------|-------|-------|
| PA4605_at      | 130.76  | 125.03 | 0.817 | 1.05  |
| PA4606_at      | 584.94  | 441.10 | 0.151 | 1.33  |
| PA4607_at      | 158.40  | 153.13 | 0.643 | 1.03  |
| PA4608_at      | 74.18   | 56.92  | 0.151 | 1.30  |
| PA4609_radA_at | 55.60   | 68.30  | 0.048 | -1.23 |
| PA4610_at      | 26.78   | 29.88  | 0.484 | -1.12 |
| PA4611_at      | 32.88   | 60.65  | 0.151 | -1.84 |
| PA4612_at      | 9.10    | 14.60  | 0.048 | -1.60 |
| PA4613_katB_at | 152.56  | 33.60  | 0.008 | 4.54  |
| PA4614_mscL_at | 107.70  | 185.95 | 0.008 | -1.73 |
| PA4615_at      | 72.98   | 81.05  | 0.238 | -1.11 |
| PA4616_at      | 62.84   | 96.75  | 0.008 | -1.54 |
| PA4617_at      | 50.48   | 51.15  | 0.817 | -1.01 |
| PA4618_at      | 39.64   | 35.55  | 0.817 | 1.12  |
| PA4619_at      | 87.20   | 106.25 | 0.048 | -1.22 |
| PA4620_at      | 140.36  | 186.35 | 0.024 | -1.33 |
| PA4621_at      | 54.46   | 78.45  | 0.024 | -1.44 |
| PA4622_at      | 25.00   | 34.03  | 0.087 | -1.36 |
| PA4623_r_at    | 14.88   | 26.85  | 0.143 | -1.80 |
| PA4624_at      | 18.36   | 28.55  | 0.024 | -1.56 |
| PA4625_at      | 53.88   | 64.00  | 0.024 | -1.19 |
| PA4626_hprA_at | 187.76  | 127.07 | 0.008 | 1.48  |
| PA4627_at      | 324.56  | 302.27 | 0.349 | 1.07  |
| PA4628_lysP_at | 70.14   | 116.78 | 0.008 | -1.66 |
| PA4629_at      | 82.70   | 55.03  | 0.008 | 1.50  |
| PA4630_at      | 16.26   | 13.02  | 0.349 | 1.25  |
| PA4631_at      | 125.32  | 120.03 | 0.643 | 1.04  |
| PA4632_at      | 1075.08 | 951.67 | 0.048 | 1.13  |
| PA4633_at      | 196.66  | 163.55 | 0.151 | 1.20  |
| PA4634_at      | 39.46   | 39.52  | 0.643 | -1.00 |
| PA4635_at      | 17.46   | 9.60   | 0.151 | 1.82  |
| PA4636_at      | 371.28  | 370.80 | 0.643 | 1.00  |
| PA4637_i_at    | 16.74   | 21.55  | 0.349 | -1.29 |
| PA4638_at      | 15.90   | 33.60  | 0.008 | -2.11 |
| PA4639_at      | 706.32  | 765.00 | 0.349 | -1.08 |
| PA4640_mqoB_at | 727.98  | 736.92 | 0.484 | -1.01 |
| PA4641_at      | 22.52   | 31.78  | 0.048 | -1.41 |
| PA4642_at      | 104.62  | 236.05 | 0.008 | -2.26 |
| PA4643_at      | 136.00  | 115.05 | 0.151 | 1.18  |
| PA4644_at      | 37.86   | 63.82  | 0.143 | -1.69 |
| PA4645_at      | 305.72  | 685.57 | 0.008 | -2.24 |
| PA4646_upp_at  | 550.14  | 466.27 | 0.008 | 1.18  |
| PA4647_uraA_at | 183.10  | 230.70 | 0.048 | -1.26 |
| PA4648_at      | 42.44   | 38.05  | 0.484 | 1.12  |
| PA4649_at      | 37.50   | 16.85  | 0.008 | 2.23  |
| PA4650_at      | 2.58    | 6.90   | 0.151 | -2.67 |
| PA4651_at      | 12.48   | 11.25  | 0.817 | 1.11  |
| PA4652_at      | 5.04    | 3.92   | 0.413 | 1.29  |
| PA4653_at      | 15.88   | 11.43  | 0.238 | 1.39  |
| PA4654_at      | 3.42    | 7.42   | 0.349 | -2.17 |
| PA4655_hemH_at | 317.26  | 321.98 | 0.817 | -1.01 |

### Supplementary Table 1. Probe set signal data for experimental and control samples

|                |         |         |       |       |
|----------------|---------|---------|-------|-------|
| PA4656_at      | 70.80   | 68.58   | 0.817 | 1.03  |
| PA4657_at      | 94.04   | 79.15   | 0.087 | 1.19  |
| PA4658_at      | 64.08   | 69.82   | 0.484 | -1.09 |
| PA4659_at      | 19.40   | 28.35   | 0.048 | -1.46 |
| PA4660_phr_at  | 80.92   | 69.50   | 0.151 | 1.16  |
| PA4661_at      | 704.34  | 851.13  | 0.087 | -1.21 |
| PA4662_murl_at | 139.30  | 169.73  | 0.024 | -1.22 |
| PA4663_moeB_at | 140.68  | 160.45  | 0.643 | -1.14 |
| PA4664_hemK_at | 303.04  | 334.92  | 0.349 | -1.11 |
| PA4665_prfA_at | 378.42  | 442.77  | 0.087 | -1.17 |
| PA4666_hemA_at | 281.06  | 320.30  | 0.151 | -1.14 |
| PA4667_at      | 426.80  | 336.52  | 0.008 | 1.27  |
| PA4668_at      | 263.36  | 204.88  | 0.008 | 1.29  |
| PA4669_ipk_at  | 188.96  | 202.65  | 0.349 | -1.07 |
| PA4670_prs_at  | 1795.96 | 1899.40 | 0.349 | -1.06 |
| PA4671_at      | 2740.04 | 3300.27 | 0.349 | -1.20 |
| PA4672_at      | 607.92  | 780.15  | 0.048 | -1.28 |
| PA4673_at      | 211.26  | 448.82  | 0.008 | -2.12 |
| PA4674_at      | 11.54   | 15.60   | 0.151 | -1.35 |
| PA4675_at      | 330.96  | 584.97  | 0.048 | -1.77 |
| PA4676_at      | 261.64  | 237.07  | 0.008 | 1.10  |
| PA4677_at      | 67.54   | 56.47   | 0.087 | 1.20  |
| PA4678_rimI_at | 80.66   | 81.40   | 0.817 | -1.01 |
| PA4679_at      | 119.00  | 112.73  | 0.643 | 1.06  |
| PA4680_at      | 22.08   | 14.80   | 0.111 | 1.49  |
| PA4681_at      | 7.18    | 22.40   | 0.024 | -3.12 |
| PA4682_at      | 28.64   | 23.42   | 0.190 | 1.22  |
| PA4683_at      | 4.86    | 4.68    | 0.643 | 1.04  |
| PA4684_at      | 173.56  | 126.82  | 0.008 | 1.37  |
| PA4685_at      | 4.64    | 1.30    | 0.063 | 3.57  |
| PA4686_at      | 685.40  | 632.78  | 0.238 | 1.08  |
| PA4687_hitA_at | 353.46  | 445.63  | 0.151 | -1.26 |
| PA4688_hitB_at | 110.46  | 166.82  | 0.008 | -1.51 |
| PA4689_at      | 51.56   | 56.50   | 0.151 | -1.10 |
| PA4690_at      | 123.34  | 111.03  | 0.008 | 1.11  |
| PA4691_at      | 22.10   | 20.55   | 1.000 | 1.08  |
| PA4692_at      | 41.44   | 38.22   | 0.817 | 1.08  |
| PA4693_pssA_at | 197.54  | 175.98  | 0.151 | 1.12  |
| PA4694_ilvC_at | 1003.34 | 925.95  | 0.087 | 1.08  |
| PA4695_ilvH_at | 692.14  | 713.75  | 0.643 | -1.03 |
| PA4696_ilvI_at | 527.76  | 439.32  | 0.008 | 1.20  |
| PA4697_at      | 406.22  | 318.85  | 0.349 | 1.27  |
| PA4698_at      | 346.66  | 316.47  | 0.349 | 1.10  |
| PA4699_at      | 191.72  | 158.28  | 0.024 | 1.21  |
| PA4700_mrcB_at | 188.36  | 170.13  | 0.087 | 1.11  |
| PA4701_at      | 426.82  | 432.57  | 0.817 | -1.01 |
| PA4702_at      | 18.74   | 19.80   | 0.817 | -1.06 |
| PA4703_at      | 12.14   | 18.63   | 0.286 | -1.53 |
| PA4704_at      | 96.12   | 69.43   | 0.024 | 1.38  |
| PA4705_at      | 25.84   | 39.58   | 0.048 | -1.53 |
| PA4706_at      | 55.12   | 47.53   | 0.087 | 1.16  |

### Supplementary Table 1. Probe set signal data for experimental and control samples

|                |         |         |       |       |
|----------------|---------|---------|-------|-------|
| PA4707_at      | 42.12   | 28.08   | 0.008 | 1.50  |
| PA4708_at      | 56.82   | 56.37   | 0.643 | 1.01  |
| PA4709_at      | 43.00   | 73.40   | 0.087 | -1.71 |
| PA4710_at      | 17.84   | 46.00   | 0.024 | -2.58 |
| PA4711_at      | 93.14   | 83.92   | 1.000 | 1.11  |
| PA4712_at      | 29.08   | 41.33   | 0.087 | -1.42 |
| PA4713_at      | 17.60   | 12.60   | 0.151 | 1.40  |
| PA4714_at      | 96.38   | 82.42   | 0.484 | 1.17  |
| PA4715_at      | 67.34   | 107.47  | 0.008 | -1.60 |
| PA4716_at      | 49.46   | 39.92   | 0.151 | 1.24  |
| PA4717_at      | 74.66   | 68.28   | 0.151 | 1.09  |
| PA4718_at      | 32.90   | 32.60   | 0.905 | 1.01  |
| PA4719_at      | 103.36  | 223.68  | 0.008 | -2.16 |
| PA4720_trmA_at | 207.66  | 328.08  | 0.008 | -1.58 |
| PA4721_at      | 28.42   | 30.40   | 0.556 | -1.07 |
| PA4722_at      | 234.14  | 198.25  | 0.349 | 1.18  |
| PA4723_dksA_at | 756.76  | 1289.22 | 0.008 | -1.70 |
| PA4724_at      | 51.38   | 73.80   | 0.008 | -1.44 |
| PA4725_at      | 50.52   | 42.80   | 0.008 | 1.18  |
| PA4726_at      | 447.48  | 368.25  | 0.024 | 1.22  |
| PA4727_pcnB_at | 381.84  | 328.33  | 0.024 | 1.16  |
| PA4728_folK_at | 118.46  | 119.73  | 0.484 | -1.01 |
| PA4729_panB_at | 758.96  | 669.08  | 0.087 | 1.13  |
| PA4730_panC_at | 642.34  | 551.28  | 0.008 | 1.17  |
| PA4731_panD_at | 261.80  | 453.00  | 0.008 | -1.73 |
| PA4732_pgi_at  | 417.94  | 363.33  | 0.048 | 1.15  |
| PA4733_acsB_at | 159.64  | 94.68   | 0.008 | 1.69  |
| PA4734_at      | 144.14  | 115.88  | 0.008 | 1.24  |
| PA4735_at      | 110.54  | 100.50  | 0.087 | 1.10  |
| PA4736_at      | 65.08   | 84.60   | 0.048 | -1.30 |
| PA4737_at      | 61.14   | 46.75   | 0.087 | 1.31  |
| PA4738_at      | 43.36   | 43.68   | 1.000 | -1.01 |
| PA4739_at      | 95.88   | 97.05   | 0.817 | -1.01 |
| PA4740_pnp_at  | 685.58  | 1022.60 | 0.008 | -1.49 |
| PA4741_rpsO_at | 1414.28 | 1798.65 | 0.008 | -1.27 |
| PA4742_truB_at | 354.04  | 472.45  | 0.024 | -1.33 |
| PA4743_rbfA_at | 588.02  | 740.25  | 0.008 | -1.26 |
| PA4744_infB_at | 962.88  | 946.57  | 0.817 | 1.02  |
| PA4745_nusA_at | 1222.80 | 1481.63 | 0.008 | -1.21 |
| PA4746_at      | 472.02  | 607.85  | 0.024 | -1.29 |
| PA4747_secG_at | 149.92  | 391.15  | 0.008 | -2.61 |
| PA4748_tpiA_at | 488.04  | 675.22  | 0.008 | -1.38 |
| PA4749_glmM_at | 293.84  | 328.85  | 0.048 | -1.12 |
| PA4750_folP_at | 139.78  | 159.85  | 0.151 | -1.14 |
| PA4751_ftsH_at | 799.82  | 578.18  | 0.008 | 1.38  |
| PA4752_ftsJ_at | 46.64   | 83.30   | 0.008 | -1.79 |
| PA4753_at      | 69.04   | 156.68  | 0.008 | -2.27 |
| PA4754_at      | 183.28  | 209.00  | 0.238 | -1.14 |
| PA4755_greA_at | 247.36  | 301.65  | 0.087 | -1.22 |
| PA4756_carB_at | 734.52  | 755.13  | 1.000 | -1.03 |
| PA4757_at      | 400.16  | 527.00  | 0.048 | -1.32 |

### Supplementary Table 1. Probe set signal data for experimental and control samples

|                |         |         |       |       |
|----------------|---------|---------|-------|-------|
| PA4758_carA_at | 443.20  | 465.00  | 0.817 | -1.05 |
| PA4759_dapB_at | 181.44  | 409.05  | 0.008 | -2.25 |
| PA4760_dnaJ_at | 392.84  | 528.17  | 0.008 | -1.34 |
| PA4761_dnaK_at | 1074.44 | 1359.10 | 0.024 | -1.26 |
| PA4762_grpE_at | 2740.28 | 2730.55 | 0.643 | 1.00  |
| PA4763_recN_at | 1270.90 | 153.60  | 0.008 | 8.27  |
| PA4764_fur_at  | 181.52  | 287.45  | 0.008 | -1.58 |
| PA4765_omlA_at | 1041.66 | 992.20  | 0.643 | 1.05  |
| PA4766_at      | 34.86   | 45.63   | 0.087 | -1.31 |
| PA4767_at      | 183.46  | 156.98  | 0.151 | 1.17  |
| PA4768_smpB_at | 94.68   | 140.43  | 0.024 | -1.48 |
| PA4769_at      | 125.88  | 129.45  | 0.643 | -1.03 |
| PA4770_ildP_at | 17.58   | 17.63   | 0.484 | -1.00 |
| PA4771_ildD_at | 21.02   | 21.13   | 1.000 | -1.01 |
| PA4772_at      | 31.12   | 19.85   | 0.151 | 1.57  |
| PA4773_at      | 623.38  | 568.58  | 0.484 | 1.10  |
| PA4774_at      | 196.80  | 171.05  | 0.238 | 1.15  |
| PA4775_at      | 249.76  | 170.65  | 0.048 | 1.46  |
| PA4776_at      | 326.04  | 235.57  | 0.024 | 1.38  |
| PA4777_at      | 68.96   | 54.45   | 0.048 | 1.27  |
| PA4778_at      | 317.74  | 317.25  | 0.643 | 1.00  |
| PA4779_at      | 16.12   | 9.20    | 0.079 | 1.75  |
| PA4780_at      | 102.44  | 112.20  | 0.349 | -1.10 |
| PA4781_at      | 26.94   | 13.52   | 0.048 | 1.99  |
| PA4782_at      | 74.66   | 58.00   | 0.151 | 1.29  |
| PA4783_at      | 20.30   | 19.88   | 0.643 | 1.02  |
| PA4784_at      | 91.76   | 88.42   | 0.817 | 1.04  |
| PA4785_at      | 27.48   | 12.45   | 0.008 | 2.21  |
| PA4786_at      | 34.38   | 24.60   | 0.087 | 1.40  |
| PA4787_at      | 110.66  | 73.42   | 0.024 | 1.51  |
| PA4788_at      | 32.66   | 20.83   | 0.008 | 1.57  |
| PA4789_at      | 110.08  | 122.38  | 0.349 | -1.11 |
| PA4790_at      | 68.22   | 68.43   | 0.643 | -1.00 |
| PA4791_at      | 95.46   | 79.55   | 0.087 | 1.20  |
| PA4792_at      | 48.80   | 46.45   | 0.643 | 1.05  |
| PA4793_at      | 220.06  | 201.05  | 0.349 | 1.09  |
| PA4794_at      | 106.66  | 74.15   | 0.008 | 1.44  |
| PA4795_at      | 104.84  | 116.68  | 0.484 | -1.11 |
| PA4796_at      | 44.54   | 55.95   | 0.048 | -1.26 |
| PA4798_at      | 54.72   | 35.72   | 0.008 | 1.53  |
| PA4799_at      | 14.94   | 12.93   | 0.484 | 1.16  |
| PA4800_at      | 27.18   | 26.20   | 1.000 | 1.04  |
| PA4801_at      | 41.32   | 40.53   | 0.817 | 1.02  |
| PA4802_at      | 26.00   | 37.65   | 0.238 | -1.45 |
| PA4803_at      | 55.40   | 45.70   | 0.349 | 1.21  |
| PA4804_at      | 12.18   | 12.67   | 0.817 | -1.04 |
| PA4805_at      | 10.14   | 11.93   | 0.817 | -1.18 |
| PA4806_at      | 23.44   | 16.60   | 0.413 | 1.41  |
| PA4807_selB_at | 107.64  | 71.60   | 0.024 | 1.50  |
| PA4808_selA_at | 170.40  | 146.80  | 0.087 | 1.16  |
| PA4809_fdhE_at | 104.38  | 98.40   | 0.484 | 1.06  |

### Supplementary Table 1. Probe set signal data for experimental and control samples

|                 |         |         |       |       |
|-----------------|---------|---------|-------|-------|
| PA4810_fdnI_at  | 170.38  | 132.65  | 0.349 | 1.28  |
| PA4811_fdnH_at  | 163.02  | 148.20  | 0.484 | 1.10  |
| PA4812_fdnG_at  | 399.78  | 329.30  | 0.048 | 1.21  |
| PA4813_lipC_at  | 2.24    | 2.05    | 0.484 | 1.09  |
| PA4814_fadH2_at | 27.04   | 20.63   | 0.643 | 1.31  |
| PA4815_at       | 41.94   | 49.65   | 0.349 | -1.18 |
| PA4816_at       | 34.18   | 26.82   | 0.143 | 1.27  |
| PA4817_at       | 54.54   | 66.40   | 0.238 | -1.22 |
| PA4818_at       | 6.00    | 14.73   | 0.048 | -2.45 |
| PA4819_at       | 18.08   | 19.90   | 0.730 | -1.10 |
| PA4820_at       | 5.02    | 7.27    | 0.817 | -1.45 |
| PA4821_at       | 25.44   | 40.70   | 0.008 | -1.60 |
| PA4822_at       | 9.92    | 10.22   | 0.817 | -1.03 |
| PA4823_at       | 10.86   | 17.90   | 0.048 | -1.65 |
| PA4824_at       | 22.30   | 23.00   | 1.000 | -1.03 |
| PA4825_mgtA_at  | 42.10   | 27.42   | 0.151 | 1.54  |
| PA4826_at       | 213.84  | 141.08  | 0.151 | 1.52  |
| PA4827_at       | 25.72   | 19.57   | 0.151 | 1.31  |
| PA4828_at       | 7.58    | 13.65   | 0.087 | -1.80 |
| PA4829_lpd3_at  | 16.50   | 15.50   | 0.817 | 1.06  |
| PA4830_at       | 23.74   | 22.60   | 0.905 | 1.05  |
| PA4831_at       | 55.96   | 54.88   | 1.000 | 1.02  |
| PA4832_at       | 22.38   | 17.85   | 0.238 | 1.25  |
| PA4833_at       | 34.16   | 32.33   | 0.643 | 1.06  |
| PA4834_at       | 21.48   | 12.92   | 0.151 | 1.66  |
| PA4835_at       | 11.86   | 13.50   | 0.643 | -1.14 |
| PA4836_at       | 10.98   | 18.97   | 0.151 | -1.73 |
| PA4837_at       | 27.68   | 43.50   | 0.151 | -1.57 |
| PA4838_at       | 28.44   | 22.40   | 0.151 | 1.27  |
| PA4839_speA_at  | 111.70  | 321.22  | 0.008 | -2.88 |
| PA4840_at       | 80.86   | 201.27  | 0.008 | -2.49 |
| PA4841_at       | 95.24   | 87.73   | 0.349 | 1.09  |
| PA4842_at       | 315.48  | 329.63  | 0.238 | -1.04 |
| PA4843_at       | 280.62  | 138.10  | 0.008 | 2.03  |
| PA4844_at       | 23.80   | 19.73   | 0.484 | 1.21  |
| PA4845_dipZ_at  | 61.18   | 70.18   | 0.238 | -1.15 |
| PA4846_aroQ1_at | 654.44  | 982.15  | 0.008 | -1.50 |
| PA4847_accB_at  | 1810.88 | 2072.63 | 0.048 | -1.14 |
| PA4848_accC_at  | 1684.84 | 1580.83 | 0.087 | 1.07  |
| PA4849_at       | 30.50   | 43.10   | 0.008 | -1.41 |
| PA4850_prmA_at  | 568.98  | 373.33  | 0.008 | 1.52  |
| PA4851_at       | 240.40  | 198.48  | 0.063 | 1.21  |
| PA4852_at       | 866.12  | 895.90  | 1.000 | -1.03 |
| PA4853_fis_at   | 729.12  | 747.22  | 0.484 | -1.02 |
| PA4854_purH_at  | 367.04  | 466.95  | 0.008 | -1.27 |
| PA4855_purD_at  | 388.66  | 487.85  | 0.087 | -1.26 |
| PA4856_at       | 232.62  | 228.25  | 0.817 | 1.02  |
| PA4857_at       | 22.92   | 27.00   | 0.484 | -1.18 |
| PA4858_at       | 13.72   | 11.55   | 0.643 | 1.19  |
| PA4859_at       | 47.20   | 35.63   | 0.151 | 1.32  |
| PA4860_at       | 11.54   | 15.92   | 0.048 | -1.38 |

### Supplementary Table 1. Probe set signal data for experimental and control samples

|                |        |        |       |       |
|----------------|--------|--------|-------|-------|
| PA4861_at      | 8.02   | 6.60   | 1.000 | 1.22  |
| PA4862_at      | 5.64   | 11.95  | 0.087 | -2.12 |
| PA4863_at      | 166.46 | 119.60 | 0.008 | 1.39  |
| PA4864_ureD_at | 47.10  | 36.50  | 0.151 | 1.29  |
| PA4865_ureA_at | 141.58 | 122.15 | 0.087 | 1.16  |
| PA4866_at      | 92.16  | 60.00  | 0.008 | 1.54  |
| PA4867_ureB_at | 56.06  | 52.95  | 0.484 | 1.06  |
| PA4868_ureC_at | 72.36  | 59.53  | 0.151 | 1.22  |
| PA4869_at      | 28.14  | 37.30  | 0.048 | -1.33 |
| PA4870_at      | 55.86  | 75.68  | 0.151 | -1.35 |
| PA4871_at      | 10.70  | 15.25  | 0.238 | -1.43 |
| PA4872_at      | 292.34 | 188.38 | 0.008 | 1.55  |
| PA4873_at      | 40.06  | 91.47  | 0.008 | -2.28 |
| PA4874_at      | 116.98 | 108.63 | 0.643 | 1.08  |
| PA4875_at      | 38.70  | 27.25  | 0.008 | 1.42  |
| PA4876_osmE_at | 84.32  | 80.35  | 0.643 | 1.05  |
| PA4877_at      | 28.74  | 23.58  | 0.349 | 1.22  |
| PA4878_at      | 55.04  | 45.82  | 0.349 | 1.20  |
| PA4879_at      | 29.84  | 21.50  | 0.349 | 1.39  |
| PA4880_at      | 62.60  | 48.50  | 0.151 | 1.29  |
| PA4881_at      | 21.82  | 17.67  | 0.349 | 1.23  |
| PA4882_at      | 2.30   | 7.67   | 0.238 | -3.33 |
| PA4883_at      | 8.90   | 4.38   | 0.151 | 2.03  |
| PA4884_at      | 13.28  | 16.63  | 0.349 | -1.25 |
| PA4885_irlR_at | 50.42  | 47.05  | 0.817 | 1.07  |
| PA4886_at      | 14.64  | 11.13  | 0.238 | 1.32  |
| PA4887_at      | 39.48  | 61.67  | 0.048 | -1.56 |
| PA4888_at      | 50.62  | 71.68  | 0.151 | -1.42 |
| PA4889_at      | 58.78  | 90.75  | 0.008 | -1.54 |
| PA4890_at      | 112.48 | 102.72 | 0.349 | 1.10  |
| PA4891_ureE_at | 16.82  | 8.35   | 0.040 | 2.01  |
| PA4892_ureF_at | 38.34  | 42.67  | 0.484 | -1.11 |
| PA4893_ureG_at | 36.82  | 45.03  | 0.238 | -1.22 |
| PA4894_i_at    | 21.70  | 28.58  | 0.349 | -1.32 |
| PA4895_at      | 16.46  | 14.17  | 0.087 | 1.16  |
| PA4896_at      | 26.90  | 27.75  | 0.905 | -1.03 |
| PA4897_at      | 36.32  | 32.78  | 0.556 | 1.11  |
| PA4898_at      | 12.52  | 8.90   | 0.817 | 1.41  |
| PA4899_at      | 8.96   | 5.72   | 0.817 | 1.57  |
| PA4900_at      | 13.12  | 16.42  | 0.349 | -1.25 |
| PA4901_mdIC_at | 5.54   | 9.18   | 0.238 | -1.66 |
| PA4902_at      | 42.96  | 40.05  | 0.230 | 1.07  |
| PA4903_at      | 24.20  | 17.67  | 0.151 | 1.37  |
| PA4904_vanA_at | 16.56  | 15.65  | 0.817 | 1.06  |
| PA4905_vanB_at | 1.40   | 2.98   | 0.087 | -2.13 |
| PA4906_at      | 52.46  | 51.17  | 0.817 | 1.03  |
| PA4907_at      | 373.82 | 364.23 | 0.643 | 1.03  |
| PA4908_at      | 13.08  | 18.25  | 0.087 | -1.40 |
| PA4909_at      | 6.44   | 10.35  | 0.230 | -1.61 |
| PA4910_at      | 17.58  | 16.33  | 0.817 | 1.08  |
| PA4911_at      | 13.44  | 6.50   | 0.484 | 2.07  |



## Supplementary Table 1. Probe set signal data for experimental and control samples

|                 |         |         |       |       |
|-----------------|---------|---------|-------|-------|
| PA4912_at       | 14.36   | 12.45   | 0.643 | 1.15  |
| PA4913_at       | 28.86   | 26.52   | 0.556 | 1.09  |
| PA4914_at       | 32.36   | 27.48   | 0.151 | 1.18  |
| PA4915_at       | 18.24   | 17.02   | 0.817 | 1.07  |
| PA4916_at       | 63.62   | 53.15   | 0.238 | 1.20  |
| PA4917_at       | 96.82   | 77.03   | 0.087 | 1.26  |
| PA4918_at       | 291.84  | 233.80  | 0.151 | 1.25  |
| PA4919_pncB1_at | 241.90  | 208.02  | 0.151 | 1.16  |
| PA4920_nadE_at  | 705.44  | 527.00  | 0.008 | 1.34  |
| PA4921_at       | 66.18   | 54.35   | 0.024 | 1.22  |
| PA4922_azul_at  | 3964.62 | 2592.77 | 0.008 | 1.53  |
| PA4923_at       | 169.66  | 246.35  | 0.008 | -1.45 |
| PA4924_at       | 43.68   | 45.75   | 1.000 | -1.05 |
| PA4925_at       | 14.26   | 14.40   | 1.000 | -1.01 |
| PA4926_at       | 10.02   | 21.75   | 0.048 | -2.17 |
| PA4927_at       | 19.84   | 15.30   | 0.238 | 1.30  |
| PA4928_at       | 154.88  | 207.00  | 0.008 | -1.34 |
| PA4929_at       | 14.46   | 13.22   | 0.817 | 1.09  |
| PA4930_alr_at   | 112.72  | 121.38  | 0.817 | -1.08 |
| PA4931_dnaB_at  | 275.60  | 318.22  | 0.151 | -1.15 |
| PA4932_rpll_at  | 2612.24 | 2274.02 | 0.349 | 1.15  |
| PA4933_at       | 1781.12 | 2134.05 | 0.024 | -1.20 |
| PA4934_rpsR_at  | 2232.50 | 2751.55 | 0.238 | -1.23 |
| PA4935_rpsF_at  | 2483.82 | 3007.65 | 0.048 | -1.21 |
| PA4936_at       | 192.06  | 176.73  | 0.349 | 1.09  |
| PA4937_rnr_at   | 667.64  | 344.60  | 0.008 | 1.94  |
| PA4938_purA_at  | 642.74  | 785.25  | 0.048 | -1.22 |
| PA4939_at       | 148.08  | 241.55  | 0.008 | -1.63 |
| PA4940_at       | 391.46  | 450.92  | 0.087 | -1.15 |
| PA4941_hflC_at  | 934.08  | 744.42  | 0.008 | 1.25  |
| PA4942_hflK_at  | 887.60  | 712.18  | 0.008 | 1.25  |
| PA4943_at       | 1229.78 | 1018.48 | 0.151 | 1.21  |
| PA4944_at       | 1393.60 | 1644.67 | 0.087 | -1.18 |
| PA4945_miaA_at  | 80.26   | 91.80   | 0.024 | -1.14 |
| PA4946_mutL_at  | 138.96  | 134.27  | 0.643 | 1.03  |
| PA4947_amiB_at  | 419.64  | 310.97  | 0.008 | 1.35  |
| PA4948_at       | 86.10   | 98.98   | 0.238 | -1.15 |
| PA4949_at       | 68.16   | 74.25   | 0.349 | -1.09 |
| PA4950_at       | 58.42   | 50.42   | 0.238 | 1.16  |
| PA4951_orn_at   | 288.28  | 304.08  | 0.817 | -1.05 |
| PA4952_at       | 153.02  | 174.35  | 0.048 | -1.14 |
| PA4953_motB_at  | 150.90  | 118.57  | 0.024 | 1.27  |
| PA4954_motA_at  | 67.18   | 79.85   | 0.349 | -1.19 |
| PA4955_at       | 86.28   | 61.00   | 0.024 | 1.41  |
| PA4956_rhdA_at  | 194.64  | 215.12  | 0.008 | -1.11 |
| PA4957_psd_at   | 296.22  | 286.52  | 0.817 | 1.03  |
| PA4958_at       | 143.64  | 120.65  | 0.048 | 1.19  |
| PA4959_at       | 154.90  | 147.15  | 0.413 | 1.05  |
| PA4960_at       | 157.26  | 188.73  | 0.008 | -1.20 |
| PA4961_at       | 205.18  | 194.60  | 0.349 | 1.05  |
| PA4962_at       | 19.20   | 17.73   | 0.643 | 1.08  |

## Supplementary Table 1. Probe set signal data for experimental and control samples

|                |        |        |       |       |
|----------------|--------|--------|-------|-------|
| PA4963_at      | 96.56  | 116.45 | 0.151 | -1.21 |
| PA4964_parC_at | 269.04 | 176.75 | 0.008 | 1.52  |
| PA4965_at      | 225.50 | 171.82 | 0.349 | 1.31  |
| PA4966_at      | 240.80 | 172.60 | 0.008 | 1.40  |
| PA4967_parE_at | 240.96 | 174.93 | 0.008 | 1.38  |
| PA4968_at      | 257.36 | 150.07 | 0.008 | 1.71  |
| PA4969_at      | 60.52  | 54.30  | 0.238 | 1.11  |
| PA4970_at      | 187.28 | 168.98 | 0.643 | 1.11  |
| PA4971_at      | 119.02 | 123.75 | 0.817 | -1.04 |
| PA4972_at      | 82.82  | 110.35 | 0.008 | -1.33 |
| PA4973_thiC_at | 41.62  | 51.65  | 0.087 | -1.24 |
| PA4974_at      | 540.68 | 510.48 | 0.349 | 1.06  |
| PA4975_at      | 9.28   | 18.63  | 0.238 | -2.01 |
| PA4976_aspC_at | 29.46  | 29.10  | 1.000 | 1.01  |
| PA4977_at      | 43.12  | 29.65  | 0.151 | 1.45  |
| PA4978_at      | 17.48  | 19.43  | 0.484 | -1.11 |
| PA4979_at      | 15.14  | 12.75  | 0.238 | 1.19  |
| PA4980_at      | 22.18  | 30.48  | 0.238 | -1.37 |
| PA4981_at      | 4.50   | 15.05  | 0.008 | -3.34 |
| PA4982_at      | 21.48  | 23.20  | 0.643 | -1.08 |
| PA4983_at      | 62.18  | 32.80  | 0.008 | 1.90  |
| PA4984_at      | 51.20  | 34.55  | 0.048 | 1.48  |
| PA4985_at      | 24.00  | 20.63  | 0.349 | 1.16  |
| PA4986_at      | 27.50  | 20.10  | 0.484 | 1.37  |
| PA4987_at      | 68.64  | 60.15  | 0.151 | 1.14  |
| PA4988_waaA_at | 78.96  | 59.28  | 0.048 | 1.33  |
| PA4989_at      | 29.54  | 20.60  | 0.238 | 1.43  |
| PA4990_at      | 12.42  | 17.20  | 0.349 | -1.38 |
| PA4991_at      | 167.66 | 167.52 | 0.643 | 1.00  |
| PA4992_at      | 51.04  | 63.38  | 0.087 | -1.24 |
| PA4993_at      | 49.16  | 45.47  | 0.349 | 1.08  |
| PA4994_at      | 22.76  | 27.60  | 0.635 | -1.21 |
| PA4995_at      | 17.62  | 6.70   | 0.008 | 2.63  |
| PA4996_rfaE_at | 270.76 | 266.65 | 0.643 | 1.02  |
| PA4997_msbA_at | 236.14 | 292.13 | 0.087 | -1.24 |
| PA4998_at      | 425.56 | 344.28 | 0.008 | 1.24  |
| PA4999_at      | 46.58  | 44.67  | 0.643 | 1.04  |
| PA5000_at      | 102.98 | 171.23 | 0.008 | -1.66 |
| PA5001_at      | 138.40 | 188.43 | 0.008 | -1.36 |
| PA5002_at      | 125.82 | 113.60 | 0.349 | 1.11  |
| PA5003_at      | 163.80 | 157.68 | 0.643 | 1.04  |
| PA5004_at      | 200.40 | 191.75 | 0.484 | 1.05  |
| PA5005_at      | 494.24 | 653.92 | 0.008 | -1.32 |
| PA5006_at      | 119.22 | 82.08  | 0.048 | 1.45  |
| PA5007_at      | 104.20 | 146.43 | 0.008 | -1.41 |
| PA5008_at      | 238.90 | 233.60 | 1.000 | 1.02  |
| PA5009_waaP_at | 140.36 | 165.82 | 0.087 | -1.18 |
| PA5010_waaG_at | 188.62 | 217.30 | 0.151 | -1.15 |
| PA5011_waaC_at | 317.36 | 332.00 | 0.484 | -1.05 |
| PA5012_waaF_at | 422.44 | 521.13 | 0.151 | -1.23 |
| PA5013_ilvE_at | 552.90 | 800.05 | 0.008 | -1.45 |

**Supplementary Table 1. Probe set signal data for experimental and control samples**

|                 |         |         |       |       |
|-----------------|---------|---------|-------|-------|
| PA5014_glnE_at  | 116.40  | 93.40   | 0.008 | 1.25  |
| PA5015_aceE_at  | 886.66  | 1283.07 | 0.008 | -1.45 |
| PA5016_aceF_at  | 553.82  | 845.20  | 0.024 | -1.53 |
| PA5017_at       | 120.96  | 106.85  | 0.238 | 1.13  |
| PA5018_msrA_at  | 343.50  | 240.15  | 0.008 | 1.43  |
| PA5019_at       | 99.28   | 96.40   | 1.000 | 1.03  |
| PA5020_at       | 20.48   | 16.67   | 0.484 | 1.23  |
| PA5021_at       | 81.04   | 71.05   | 0.151 | 1.14  |
| PA5022_at       | 115.82  | 103.88  | 0.238 | 1.11  |
| PA5023_at       | 28.50   | 28.17   | 0.817 | 1.01  |
| PA5024_at       | 21.60   | 71.60   | 0.008 | -3.31 |
| PA5025_metY_at  | 135.56  | 115.20  | 0.024 | 1.18  |
| PA5026_at       | 27.98   | 36.97   | 0.151 | -1.32 |
| PA5027_at       | 22.28   | 32.55   | 0.238 | -1.46 |
| PA5028_at       | 289.10  | 248.92  | 0.151 | 1.16  |
| PA5029_at       | 37.84   | 42.15   | 0.349 | -1.11 |
| PA5030_at       | 40.12   | 54.02   | 0.024 | -1.35 |
| PA5031_at       | 20.58   | 24.40   | 0.643 | -1.19 |
| PA5032_at       | 15.10   | 8.63    | 0.230 | 1.75  |
| PA5033_at       | 114.08  | 92.13   | 0.048 | 1.24  |
| PA5034_hemE_at  | 53.90   | 73.68   | 0.048 | -1.37 |
| PA5035_gltD_at  | 93.36   | 84.68   | 0.238 | 1.10  |
| PA5036_gltB_at  | 149.72  | 119.32  | 0.008 | 1.25  |
| PA5037_at       | 426.30  | 460.70  | 0.087 | -1.08 |
| PA5038_aroB_at  | 107.18  | 171.73  | 0.008 | -1.60 |
| PA5039_aroK_at  | 327.80  | 380.85  | 0.048 | -1.16 |
| PA5040_pilQ_at  | 605.84  | 513.33  | 0.048 | 1.18  |
| PA5041_pilP_at  | 513.30  | 495.17  | 0.643 | 1.04  |
| PA5042_pilO_at  | 334.46  | 344.78  | 1.000 | -1.03 |
| PA5043_pilN_at  | 442.90  | 437.32  | 0.817 | 1.01  |
| PA5044_pilM_at  | 818.20  | 694.75  | 0.048 | 1.18  |
| PA5045_ponA_at  | 141.64  | 127.35  | 0.238 | 1.11  |
| PA5046_at       | 2325.92 | 1705.93 | 0.008 | 1.36  |
| PA5047_at       | 87.76   | 136.10  | 0.008 | -1.55 |
| PA5048_at       | 193.66  | 225.73  | 0.008 | -1.17 |
| PA5049_rpmE_at  | 174.94  | 481.95  | 0.008 | -2.75 |
| PA5050_priA_at  | 123.64  | 113.35  | 0.817 | 1.09  |
| PA5051_argS_at  | 265.86  | 369.17  | 0.008 | -1.39 |
| PA5052_at       | 359.76  | 410.23  | 0.087 | -1.14 |
| PA5053_hslV_at  | 631.56  | 798.82  | 0.238 | -1.26 |
| PA5054_hslU_at  | 1739.70 | 1661.72 | 0.817 | 1.05  |
| PA5055_at       | 206.78  | 225.32  | 0.643 | -1.09 |
| PA5056_phaC1_at | 98.62   | 69.55   | 0.087 | 1.42  |
| PA5057_phaD_at  | 34.66   | 22.70   | 0.008 | 1.53  |
| PA5058_phaC2_at | 24.30   | 20.80   | 0.151 | 1.17  |
| PA5059_at       | 5.70    | 2.80    | 0.111 | 2.04  |
| PA5060_phaF_at  | 300.56  | 266.27  | 0.349 | 1.13  |
| PA5061_at       | 46.18   | 51.93   | 0.238 | -1.12 |
| PA5062_at       | 114.96  | 111.57  | 0.817 | 1.03  |
| PA5063_ubiE_at  | 609.12  | 583.43  | 0.349 | 1.04  |
| PA5064_at       | 437.08  | 482.27  | 0.349 | -1.10 |

**Supplementary Table 1. Probe set signal data for experimental and control samples**

|                 |        |        |       |       |
|-----------------|--------|--------|-------|-------|
| PA5065_at       | 220.14 | 240.48 | 0.087 | -1.09 |
| PA5066_hisl_at  | 455.62 | 601.47 | 0.008 | -1.32 |
| PA5067_hisE_at  | 406.38 | 554.22 | 0.008 | -1.36 |
| PA5068_tatA_at  | 276.38 | 405.13 | 0.008 | -1.47 |
| PA5069_tatB_at  | 463.38 | 452.38 | 0.484 | 1.02  |
| PA5070_tatC_at  | 115.50 | 130.18 | 0.484 | -1.13 |
| PA5071_at       | 66.32  | 70.00  | 0.643 | -1.06 |
| PA5072_at       | 148.48 | 159.98 | 0.643 | -1.08 |
| PA5073_at       | 87.24  | 94.50  | 0.643 | -1.08 |
| PA5074_at       | 106.84 | 126.07 | 0.087 | -1.18 |
| PA5075_at       | 373.68 | 335.95 | 0.151 | 1.11  |
| PA5076_at       | 129.66 | 249.40 | 0.008 | -1.92 |
| PA5077_mdoH_at  | 237.74 | 205.18 | 0.238 | 1.16  |
| PA5078_at       | 887.92 | 742.63 | 0.008 | 1.20  |
| PA5079_at       | 142.64 | 172.63 | 0.048 | -1.21 |
| PA5080_at       | 343.44 | 313.95 | 0.484 | 1.09  |
| PA5081_at       | 44.76  | 33.38  | 0.087 | 1.34  |
| PA5082_at       | 37.72  | 49.35  | 0.008 | -1.31 |
| PA5083_at       | 25.16  | 28.67  | 0.349 | -1.14 |
| PA5084_at       | 7.80   | 7.43   | 0.817 | 1.05  |
| PA5085_at       | 70.50  | 50.80  | 0.087 | 1.39  |
| PA5086_at       | 21.58  | 12.08  | 0.087 | 1.79  |
| PA5087_at       | 14.20  | 11.85  | 0.643 | 1.20  |
| PA5088_at       | 13.14  | 9.95   | 0.151 | 1.32  |
| PA5089_at       | 26.06  | 31.38  | 0.032 | -1.20 |
| PA5090_at       | 46.76  | 41.85  | 0.413 | 1.12  |
| PA5091_hutG_at  | 59.48  | 62.90  | 0.349 | -1.06 |
| PA5092_hutI_at  | 23.60  | 22.88  | 1.000 | 1.03  |
| PA5093_at       | 14.00  | 10.30  | 0.151 | 1.36  |
| PA5094_at       | 41.82  | 41.53  | 0.643 | 1.01  |
| PA5095_at       | 45.44  | 41.85  | 0.817 | 1.09  |
| PA5096_at       | 14.50  | 15.70  | 0.817 | -1.08 |
| PA5097_at       | 11.16  | 13.08  | 0.817 | -1.17 |
| PA5098_hutH_at  | 14.12  | 10.07  | 0.817 | 1.40  |
| PA5099_at       | 10.42  | 9.55   | 0.817 | 1.09  |
| PA5100_hutU_at  | 54.92  | 39.23  | 0.024 | 1.40  |
| PA5101_at       | 40.16  | 27.95  | 0.190 | 1.44  |
| PA5102_at       | 5.48   | 14.50  | 0.024 | -2.65 |
| PA5103_at       | 24.22  | 27.63  | 1.000 | -1.14 |
| PA5104_at       | 39.20  | 47.40  | 0.111 | -1.21 |
| PA5105_hutC_at  | 43.32  | 55.32  | 0.024 | -1.28 |
| PA5106_at       | 33.94  | 35.52  | 0.643 | -1.05 |
| PA5107_blc_at   | 86.28  | 81.45  | 0.643 | 1.06  |
| PA5108_at       | 80.36  | 87.08  | 0.484 | -1.08 |
| PA5109_at       | 125.28 | 148.77 | 0.048 | -1.19 |
| PA5110_fbp_at   | 472.32 | 586.05 | 0.008 | -1.24 |
| PA5111_gloA3_at | 246.54 | 235.68 | 0.238 | 1.05  |
| PA5112_estA_at  | 945.30 | 613.63 | 0.008 | 1.54  |
| PA5113_at       | 203.66 | 249.97 | 0.238 | -1.23 |
| PA5114_at       | 98.34  | 110.38 | 0.484 | -1.12 |
| PA5115_at       | 11.48  | 17.60  | 0.151 | -1.53 |

## Supplementary Table 1. Probe set signal data for experimental and control samples

|                 |         |         |       |       |
|-----------------|---------|---------|-------|-------|
| PA5116_at       | 4.20    | 19.25   | 0.008 | -4.58 |
| PA5117_typA_at  | 425.90  | 671.80  | 0.008 | -1.58 |
| PA5118_thil_at  | 278.08  | 349.50  | 0.151 | -1.26 |
| PA5119_glnA_at  | 1409.76 | 1449.25 | 0.817 | -1.03 |
| PA5120_at       | 63.48   | 88.20   | 0.024 | -1.39 |
| PA5121_at       | 49.48   | 52.90   | 0.286 | -1.07 |
| PA5122_at       | 141.72  | 110.52  | 0.048 | 1.28  |
| PA5123_at       | 73.32   | 65.82   | 0.151 | 1.11  |
| PA5124_ntrB_at  | 48.18   | 53.50   | 0.484 | -1.11 |
| PA5125_ntrC_at  | 60.84   | 68.82   | 0.087 | -1.13 |
| PA5126_at       | 49.64   | 43.85   | 0.238 | 1.13  |
| PA5127_at       | 33.52   | 42.98   | 0.238 | -1.28 |
| PA5128_secB_at  | 1027.14 | 1513.45 | 0.008 | -1.47 |
| PA5129_grx_at   | 1770.96 | 1477.47 | 0.048 | 1.20  |
| PA5130_at       | 863.34  | 965.68  | 0.238 | -1.12 |
| PA5131_pgm_at   | 597.58  | 586.72  | 0.643 | 1.02  |
| PA5132_at       | 59.82   | 62.07   | 0.643 | -1.04 |
| PA5133_at       | 263.76  | 268.65  | 0.817 | -1.02 |
| PA5134_at       | 553.78  | 380.47  | 0.008 | 1.46  |
| PA5135_at       | 173.36  | 133.40  | 0.008 | 1.30  |
| PA5136_at       | 160.50  | 175.45  | 0.484 | -1.09 |
| PA5137_at       | 27.02   | 24.05   | 0.238 | 1.12  |
| PA5138_at       | 102.46  | 108.97  | 0.817 | -1.06 |
| PA5139_at       | 167.84  | 316.55  | 0.008 | -1.89 |
| PA5140_hisF1_at | 317.92  | 311.75  | 0.643 | 1.02  |
| PA5141_hisA_at  | 303.80  | 366.98  | 0.008 | -1.21 |
| PA5142_hisH1_at | 510.20  | 482.70  | 0.349 | 1.06  |
| PA5143_hisB_at  | 368.76  | 507.27  | 0.008 | -1.38 |
| PA5144_i_at     | 3.84    | 4.30    | 0.286 | -1.12 |
| PA5145_at       | 51.90   | 43.43   | 0.087 | 1.20  |
| PA5146_at       | 299.22  | 251.30  | 0.008 | 1.19  |
| PA5147_mutY_at  | 283.72  | 360.25  | 0.008 | -1.27 |
| PA5148_at       | 1187.84 | 1047.60 | 0.643 | 1.13  |
| PA5149_at       | 116.64  | 86.78   | 0.008 | 1.34  |
| PA5150_at       | 23.22   | 13.47   | 0.151 | 1.72  |
| PA5151_at       | 81.48   | 51.27   | 0.048 | 1.59  |
| PA5152_at       | 935.68  | 533.60  | 0.008 | 1.75  |
| PA5153_at       | 995.36  | 654.47  | 0.032 | 1.52  |
| PA5154_at       | 201.10  | 140.88  | 0.048 | 1.43  |
| PA5155_at       | 66.46   | 55.38   | 0.349 | 1.20  |
| PA5156_at       | 47.80   | 60.60   | 0.048 | -1.27 |
| PA5157_at       | 28.42   | 39.77   | 0.008 | -1.40 |
| PA5158_at       | 41.96   | 46.83   | 0.817 | -1.12 |
| PA5159_at       | 13.06   | 30.40   | 0.079 | -2.33 |
| PA5160_at       | 27.04   | 34.45   | 0.238 | -1.27 |
| PA5161_rmlB_at  | 502.26  | 540.05  | 0.349 | -1.08 |
| PA5162_rmlD_at  | 427.08  | 510.15  | 0.048 | -1.19 |
| PA5163_rmlA_at  | 1041.66 | 1104.35 | 0.643 | -1.06 |
| PA5164_rmlC_at  | 326.44  | 419.00  | 0.024 | -1.28 |
| PA5165_at       | 73.08   | 58.58   | 0.048 | 1.25  |
| PA5166_at       | 183.94  | 163.88  | 0.238 | 1.12  |

### Supplementary Table 1. Probe set signal data for experimental and control samples

|                 |         |         |       |       |
|-----------------|---------|---------|-------|-------|
| PA5167_at       | 611.26  | 240.67  | 0.008 | 2.54  |
| PA5168_at       | 194.76  | 100.18  | 0.008 | 1.94  |
| PA5169_at       | 111.70  | 64.68   | 0.008 | 1.73  |
| PA5170_arcD_at  | 403.10  | 482.80  | 0.643 | -1.20 |
| PA5171_arcA_at  | 1136.12 | 1050.07 | 1.000 | 1.08  |
| PA5172_arcB_at  | 1033.46 | 965.25  | 0.643 | 1.07  |
| PA5173_arcC_at  | 377.38  | 261.40  | 0.151 | 1.44  |
| PA5174_at       | 335.18  | 395.65  | 0.048 | -1.18 |
| PA5175_cysQ_at  | 54.88   | 45.05   | 0.238 | 1.22  |
| PA5176_at       | 127.10  | 134.73  | 0.349 | -1.06 |
| PA5177_at       | 89.54   | 97.55   | 0.349 | -1.09 |
| PA5178_at       | 290.98  | 360.80  | 0.349 | -1.24 |
| PA5179_at       | 36.62   | 38.47   | 0.817 | -1.05 |
| PA5180_at       | 37.68   | 43.90   | 0.286 | -1.17 |
| PA5181_at       | 29.68   | 39.58   | 0.151 | -1.33 |
| PA5182_at       | 395.08  | 362.70  | 0.238 | 1.09  |
| PA5183_at       | 87.00   | 76.95   | 0.238 | 1.13  |
| PA5184_at       | 126.90  | 102.42  | 0.024 | 1.24  |
| PA5185_at       | 25.64   | 21.25   | 0.484 | 1.21  |
| PA5186_at       | 30.32   | 35.17   | 0.730 | -1.16 |
| PA5187_at       | 32.94   | 40.88   | 0.151 | -1.24 |
| PA5188_at       | 34.52   | 22.60   | 0.008 | 1.53  |
| PA5189_at       | 13.62   | 11.80   | 0.484 | 1.15  |
| PA5190_at       | 96.80   | 106.92  | 0.151 | -1.10 |
| PA5191_at       | 75.74   | 68.80   | 0.349 | 1.10  |
| PA5192_pckA_at  | 998.98  | 1374.23 | 0.008 | -1.38 |
| PA5193_yrfl_at  | 317.00  | 328.70  | 0.905 | -1.04 |
| PA5194_at       | 131.90  | 211.18  | 0.024 | -1.60 |
| PA5195_at       | 83.02   | 76.18   | 0.151 | 1.09  |
| PA5196_at       | 118.40  | 103.80  | 0.238 | 1.14  |
| PA5197_rimK_at  | 34.40   | 33.73   | 0.643 | 1.02  |
| PA5198_at       | 72.62   | 56.35   | 0.048 | 1.29  |
| PA5199_envZ_at  | 203.22  | 140.42  | 0.111 | 1.45  |
| PA5200_ompR_at  | 591.18  | 359.72  | 0.008 | 1.64  |
| PA5201_at       | 519.68  | 785.42  | 0.008 | -1.51 |
| PA5202_at       | 119.02  | 140.00  | 0.484 | -1.18 |
| PA5203_gshA_at  | 144.32  | 181.08  | 0.008 | -1.25 |
| PA5204_argA_at  | 106.06  | 86.47   | 0.238 | 1.23  |
| PA5205_at       | 41.68   | 43.57   | 1.000 | -1.05 |
| PA5206_argE_at  | 141.32  | 91.58   | 0.008 | 1.54  |
| PA5207_at       | 15.64   | 7.22    | 0.008 | 2.17  |
| PA5208_at       | 43.76   | 85.00   | 0.048 | -1.94 |
| PA5209_at       | 112.00  | 98.48   | 0.151 | 1.14  |
| PA5210_at       | 151.10  | 140.77  | 0.817 | 1.07  |
| PA5211_at       | 44.36   | 32.05   | 0.008 | 1.38  |
| PA5212_i_at     | 284.18  | 189.63  | 0.048 | 1.50  |
| PA5213_gcvP1_at | 21.08   | 35.63   | 0.048 | -1.69 |
| PA5214_gcvH1_at | 499.62  | 499.63  | 1.000 | -1.00 |
| PA5215_gcvT1_at | 295.90  | 417.90  | 0.008 | -1.41 |
| PA5216_at       | 68.68   | 74.93   | 0.238 | -1.09 |
| PA5217_at       | 454.02  | 445.82  | 0.643 | 1.02  |

**Supplementary Table 1. Probe set signal data for experimental and control samples**

|                |         |         |       |       |
|----------------|---------|---------|-------|-------|
| PA5218_at      | 17.76   | 32.00   | 0.024 | -1.80 |
| PA5219_at      | 49.28   | 35.30   | 0.087 | 1.40  |
| PA5220_at      | 128.34  | 112.90  | 0.151 | 1.14  |
| PA5221_at      | 90.42   | 92.23   | 0.984 | -1.02 |
| PA5222_at      | 222.54  | 220.80  | 1.000 | 1.01  |
| PA5223_ubiH_at | 180.42  | 166.95  | 0.087 | 1.08  |
| PA5224_pepP_at | 265.76  | 271.92  | 0.817 | -1.02 |
| PA5225_at      | 376.94  | 432.90  | 0.238 | -1.15 |
| PA5226_at      | 151.70  | 216.60  | 0.087 | -1.43 |
| PA5227_at      | 203.94  | 200.40  | 0.643 | 1.02  |
| PA5228_at      | 38.88   | 44.38   | 0.048 | -1.14 |
| PA5229_at      | 71.58   | 63.78   | 0.349 | 1.12  |
| PA5230_at      | 44.86   | 60.10   | 0.111 | -1.34 |
| PA5231_at      | 113.88  | 130.13  | 0.151 | -1.14 |
| PA5232_at      | 148.46  | 209.98  | 0.008 | -1.41 |
| PA5233_at      | 119.60  | 115.65  | 1.000 | 1.03  |
| PA5234_at      | 62.60   | 64.28   | 0.643 | -1.03 |
| PA5235_glpT_at | 17.92   | 68.13   | 0.008 | -3.80 |
| PA5236_at      | 143.62  | 137.48  | 0.556 | 1.04  |
| PA5237_at      | 275.70  | 237.15  | 0.151 | 1.16  |
| PA5238_at      | 22.80   | 17.30   | 0.484 | 1.32  |
| PA5239_rho_at  | 339.72  | 543.15  | 0.008 | -1.60 |
| PA5240_trxA_at | 463.98  | 628.95  | 0.349 | -1.36 |
| PA5241_ppx_at  | 255.34  | 221.80  | 0.087 | 1.15  |
| PA5242_ppk_at  | 376.86  | 353.67  | 0.643 | 1.07  |
| PA5243_hemB_at | 393.56  | 382.15  | 0.817 | 1.03  |
| PA5244_at      | 64.60   | 63.85   | 0.643 | 1.01  |
| PA5245_at      | 295.18  | 248.75  | 0.008 | 1.19  |
| PA5246_at      | 16.96   | 24.30   | 0.008 | -1.43 |
| PA5247_at      | 93.32   | 97.72   | 0.643 | -1.05 |
| PA5248_at      | 62.02   | 68.77   | 0.413 | -1.11 |
| PA5249_at      | 16.28   | 9.38    | 0.286 | 1.74  |
| PA5250_at      | 126.58  | 154.15  | 0.048 | -1.22 |
| PA5251_at      | 101.92  | 120.58  | 0.151 | -1.18 |
| PA5252_at      | 272.72  | 298.45  | 0.238 | -1.09 |
| PA5253_algP_at | 1771.72 | 1554.43 | 0.008 | 1.14  |
| PA5254_at      | 58.98   | 35.10   | 0.048 | 1.68  |
| PA5255_algQ_at | 576.78  | 492.92  | 0.238 | 1.17  |
| PA5256_dsbH_at | 68.92   | 71.95   | 0.817 | -1.04 |
| PA5257_at      | 91.28   | 82.65   | 0.349 | 1.10  |
| PA5258_at      | 183.06  | 171.57  | 0.151 | 1.07  |
| PA5259_hemD_at | 81.26   | 95.55   | 0.087 | -1.18 |
| PA5260_hemC_at | 213.16  | 201.02  | 0.484 | 1.06  |
| PA5261_algR_at | 105.00  | 102.63  | 0.817 | 1.02  |
| PA5262_algZ_at | 73.68   | 65.60   | 0.151 | 1.12  |
| PA5263_argH_at | 674.68  | 629.25  | 0.048 | 1.07  |
| PA5264_at      | 18.22   | 13.42   | 0.349 | 1.36  |
| PA5265_at      | 2.58    | 9.07    | 0.048 | -3.52 |
| PA5266_at      | 31.52   | 19.27   | 0.048 | 1.64  |
| PA5268_corA_at | 133.48  | 112.65  | 0.048 | 1.18  |
| PA5269_at      | 59.20   | 67.53   | 0.349 | -1.14 |

**Supplementary Table 1. Probe set signal data for experimental and control samples**

|                  |         |         |       |       |
|------------------|---------|---------|-------|-------|
| PA5270_at        | 190.18  | 128.52  | 0.008 | 1.48  |
| PA5271_at        | 80.32   | 124.85  | 0.008 | -1.55 |
| PA5272_cyaA_at   | 51.90   | 46.25   | 0.349 | 1.12  |
| PA5273_at        | 90.24   | 68.10   | 0.024 | 1.33  |
| PA5274_rnk_at    | 594.72  | 564.03  | 0.643 | 1.05  |
| PA5275_at        | 41.50   | 36.15   | 0.484 | 1.15  |
| PA5276_lppL_i_at | 901.80  | 1342.63 | 0.008 | -1.49 |
| PA5277_lysA_at   | 552.08  | 581.75  | 0.484 | -1.05 |
| PA5278_dapF_at   | 308.40  | 305.90  | 0.643 | 1.01  |
| PA5279_at        | 587.22  | 489.90  | 0.087 | 1.20  |
| PA5280_sss_at    | 133.70  | 115.22  | 0.087 | 1.16  |
| PA5281_at        | 60.36   | 66.15   | 0.484 | -1.10 |
| PA5282_at        | 27.70   | 18.73   | 0.238 | 1.48  |
| PA5283_at        | 28.72   | 27.40   | 1.000 | 1.05  |
| PA5284_at        | 13.24   | 11.43   | 1.000 | 1.16  |
| PA5285_at        | 831.24  | 1504.47 | 0.008 | -1.81 |
| PA5286_at        | 457.96  | 571.95  | 0.048 | -1.25 |
| PA5287_amtB_at   | 44.10   | 43.22   | 0.643 | 1.02  |
| PA5288_glnK_at   | 395.70  | 523.23  | 0.048 | -1.32 |
| PA5289_at        | 433.88  | 364.15  | 0.238 | 1.19  |
| PA5290_at        | 54.78   | 58.30   | 0.349 | -1.06 |
| PA5291_at        | 71.18   | 85.88   | 0.151 | -1.21 |
| PA5292_at        | 29.42   | 27.25   | 0.484 | 1.08  |
| PA5293_at        | 34.12   | 37.50   | 0.190 | -1.10 |
| PA5294_at        | 11.14   | 7.70    | 0.349 | 1.45  |
| PA5295_at        | 141.58  | 129.45  | 0.151 | 1.09  |
| PA5296_rep_at    | 93.68   | 130.50  | 0.008 | -1.39 |
| PA5297_poxB_at   | 13.12   | 29.53   | 0.151 | -2.25 |
| PA5298_at        | 333.64  | 570.25  | 0.008 | -1.71 |
| PA5299_at        | 43.32   | 40.65   | 0.238 | 1.07  |
| PA5300_cycB_at   | 416.96  | 792.70  | 0.008 | -1.90 |
| PA5301_at        | 535.96  | 503.00  | 0.484 | 1.07  |
| PA5302_dadX_at   | 363.22  | 573.13  | 0.008 | -1.58 |
| PA5303_at        | 791.48  | 1107.03 | 0.024 | -1.40 |
| PA5304_dadA_at   | 1501.42 | 1624.20 | 0.349 | -1.08 |
| PA5305_at        | 90.40   | 109.33  | 0.087 | -1.21 |
| PA5306_at        | 213.74  | 367.70  | 0.008 | -1.72 |
| PA5307_at        | 42.24   | 42.00   | 1.000 | 1.01  |
| PA5308_lrp_at    | 101.54  | 150.73  | 0.024 | -1.48 |
| PA5309_at        | 73.40   | 82.03   | 0.484 | -1.12 |
| PA5310_at        | 36.64   | 43.63   | 0.484 | -1.19 |
| PA5311_at        | 7.94    | 6.85    | 1.000 | 1.16  |
| PA5312_at        | 828.26  | 444.92  | 0.008 | 1.86  |
| PA5313_at        | 122.02  | 78.60   | 0.048 | 1.55  |
| PA5314_at        | 15.10   | 22.90   | 0.151 | -1.52 |
| PA5315_rpmG_at   | 340.32  | 761.45  | 0.008 | -2.24 |
| PA5316_rpmB_at   | 2833.02 | 3578.78 | 0.048 | -1.26 |
| PA5317_at        | 123.34  | 95.40   | 0.087 | 1.29  |
| PA5318_at        | 57.50   | 36.97   | 0.024 | 1.56  |
| PA5319_radC_at   | 54.00   | 53.55   | 0.817 | 1.01  |
| PA5320_dfp_at    | 791.64  | 757.40  | 0.484 | 1.05  |



### Supplementary Table 1. Probe set signal data for experimental and control samples

|                |         |         |       |       |
|----------------|---------|---------|-------|-------|
| PA5321_dut_at  | 160.92  | 226.82  | 0.087 | -1.41 |
| PA5322_algC_at | 446.14  | 466.40  | 0.484 | -1.05 |
| PA5323_argB_at | 129.56  | 221.77  | 0.008 | -1.71 |
| PA5324_at      | 50.04   | 54.40   | 0.341 | -1.09 |
| PA5325_at      | 8.82    | 12.88   | 0.349 | -1.46 |
| PA5326_at      | 9.40    | 10.45   | 0.817 | -1.11 |
| PA5327_at      | 22.16   | 27.55   | 0.151 | -1.24 |
| PA5328_at      | 16.90   | 9.42    | 0.151 | 1.79  |
| PA5329_at      | 66.54   | 54.47   | 0.238 | 1.22  |
| PA5330_at      | 96.30   | 146.05  | 0.008 | -1.52 |
| PA5331_pyrE_at | 295.22  | 364.90  | 0.008 | -1.24 |
| PA5332_crc_at  | 673.82  | 913.88  | 0.008 | -1.36 |
| PA5333_at      | 79.62   | 117.88  | 0.008 | -1.48 |
| PA5334_rph_at  | 315.66  | 422.90  | 0.008 | -1.34 |
| PA5335_at      | 381.20  | 330.97  | 0.151 | 1.15  |
| PA5336_gmk_at  | 358.98  | 387.85  | 0.238 | -1.08 |
| PA5337_rpoZ_at | 659.66  | 1018.60 | 0.008 | -1.54 |
| PA5338_spoT_at | 557.70  | 512.22  | 0.238 | 1.09  |
| PA5339_at      | 802.08  | 1238.85 | 0.008 | -1.54 |
| PA5340_at      | 412.70  | 570.78  | 0.008 | -1.38 |
| PA5341_at      | 14.10   | 11.70   | 0.413 | 1.21  |
| PA5342_at      | 31.52   | 43.00   | 0.048 | -1.36 |
| PA5343_at      | 110.24  | 87.32   | 0.151 | 1.26  |
| PA5344_at      | 552.94  | 387.15  | 0.008 | 1.43  |
| PA5345_recG_at | 225.12  | 169.05  | 0.024 | 1.33  |
| PA5346_at      | 279.08  | 247.38  | 0.008 | 1.13  |
| PA5347_at      | 74.04   | 115.52  | 0.008 | -1.56 |
| PA5348_at      | 1866.20 | 1198.03 | 0.238 | 1.56  |
| PA5349_at      | 99.78   | 103.35  | 0.817 | -1.04 |
| PA5350_r_at    | 314.68  | 337.55  | 0.048 | -1.07 |
| PA5351_at      | 155.74  | 337.70  | 0.008 | -2.17 |
| PA5352_at      | 18.84   | 20.20   | 0.817 | -1.07 |
| PA5353_glcF_at | 11.22   | 11.35   | 1.000 | -1.01 |
| PA5354_glcE_at | 21.22   | 15.50   | 0.484 | 1.37  |
| PA5355_glcD_at | 28.76   | 24.75   | 0.238 | 1.16  |
| PA5356_glcC_at | 88.20   | 69.32   | 0.048 | 1.27  |
| PA5357_at      | 49.24   | 71.95   | 0.008 | -1.46 |
| PA5358_ubiA_at | 110.64  | 103.77  | 0.484 | 1.07  |
| PA5359_at      | 39.20   | 28.90   | 0.016 | 1.36  |
| PA5360_phoB_at | 130.92  | 166.75  | 0.008 | -1.27 |
| PA5361_phoR_at | 9.04    | 21.83   | 0.048 | -2.41 |
| PA5362_at      | 191.88  | 182.77  | 0.817 | 1.05  |
| PA5363_at      | 88.88   | 85.47   | 0.238 | 1.04  |
| PA5364_at      | 185.58  | 135.88  | 0.048 | 1.37  |
| PA5365_phoU_at | 104.14  | 120.13  | 0.643 | -1.15 |
| PA5366_pstB_at | 175.98  | 220.10  | 0.087 | -1.25 |
| PA5367_pstA_at | 102.62  | 138.10  | 0.048 | -1.35 |
| PA5368_pstC_at | 94.48   | 115.75  | 0.087 | -1.23 |
| PA5369_at      | 229.60  | 266.60  | 0.238 | -1.16 |
| PA5370_at      | 134.38  | 121.67  | 0.484 | 1.10  |
| PA5371_at      | 61.26   | 89.68   | 0.048 | -1.46 |

## Supplementary Table 1. Probe set signal data for experimental and control samples

|                   |        |        |       |       |
|-------------------|--------|--------|-------|-------|
| PA5372_betA_at    | 39.12  | 32.33  | 0.087 | 1.21  |
| PA5373_betB_at    | 439.04 | 230.60 | 0.008 | 1.90  |
| PA5374_betI_at    | 308.80 | 183.40 | 0.008 | 1.68  |
| PA5375_betT1_at   | 61.78  | 33.90  | 0.024 | 1.82  |
| PA5376_at         | 53.22  | 46.25  | 0.238 | 1.15  |
| PA5377_at         | 191.00 | 122.93 | 0.008 | 1.55  |
| PA5378_at         | 77.14  | 75.85  | 1.000 | 1.02  |
| PA5379_sdaB_at    | 46.24  | 30.45  | 0.024 | 1.52  |
| PA5380_at         | 280.72 | 140.32 | 0.008 | 2.00  |
| PA5381_at         | 18.50  | 15.45  | 0.643 | 1.20  |
| PA5382_at         | 22.56  | 32.10  | 0.151 | -1.42 |
| PA5383_at         | 14.88  | 13.68  | 0.643 | 1.09  |
| PA5384_at         | 9.16   | 4.55   | 0.286 | 2.01  |
| PA5385_at         | 3.16   | 18.42  | 0.008 | -5.83 |
| PA5386_at         | 6.32   | 10.77  | 0.151 | -1.70 |
| PA5387_at         | 17.06  | 19.95  | 0.817 | -1.17 |
| PA5388_at         | 16.22  | 18.27  | 0.484 | -1.13 |
| PA5389_at         | 36.48  | 34.20  | 0.817 | 1.07  |
| PA5390_at         | 10.46  | 8.65   | 0.984 | 1.21  |
| PA5391_at         | 16.10  | 13.27  | 0.643 | 1.21  |
| PA5392_at         | 15.66  | 9.75   | 0.190 | 1.61  |
| PA5393_at         | 27.92  | 12.72  | 0.048 | 2.19  |
| PA5394_cls_at     | 31.72  | 35.03  | 0.484 | -1.10 |
| PA5395_at         | 15.74  | 13.88  | 0.413 | 1.13  |
| PA5396_at         | 159.98 | 95.03  | 0.008 | 1.68  |
| PA5397_at         | 120.42 | 99.47  | 0.151 | 1.21  |
| PA5398_at         | 54.50  | 36.85  | 0.024 | 1.48  |
| PA5399_at         | 41.90  | 24.20  | 0.048 | 1.73  |
| PA5400_at         | 29.54  | 18.10  | 0.008 | 1.63  |
| PA5401_at         | 48.24  | 23.20  | 0.008 | 2.08  |
| PA5402_at         | 33.90  | 47.82  | 0.087 | -1.41 |
| PA5403_at         | 26.36  | 40.72  | 0.008 | -1.54 |
| PA5404_at         | 19.64  | 41.33  | 0.008 | -2.10 |
| PA5405_i_at       | 16.20  | 35.00  | 0.048 | -2.16 |
| PA5406_at         | 113.64 | 181.95 | 0.024 | -1.60 |
| PA5407_at         | 64.46  | 158.52 | 0.008 | -2.46 |
| PA5408_at         | 40.44  | 48.80  | 0.484 | -1.21 |
| PA5409_at         | 31.54  | 27.42  | 0.151 | 1.15  |
| PA5410_at         | 118.16 | 101.47 | 0.484 | 1.16  |
| PA5411_at         | 73.56  | 57.38  | 0.008 | 1.28  |
| PA5412_at         | 51.56  | 62.55  | 0.008 | -1.21 |
| PA5413_ltaA_at    | 171.98 | 227.28 | 0.048 | -1.32 |
| PA5414_at         | 640.34 | 615.25 | 0.817 | 1.04  |
| PA5415_glyA1_s_at | 574.96 | 483.10 | 0.151 | 1.19  |
| PA5416_soxB_at    | 81.08  | 53.25  | 0.024 | 1.52  |
| PA5417_soxD_at    | 62.54  | 59.97  | 0.643 | 1.04  |
| PA5418_soxA_at    | 70.86  | 56.83  | 0.413 | 1.25  |
| PA5419_soxG_at    | 160.74 | 87.27  | 0.024 | 1.84  |
| PA5420_purU2_at   | 46.10  | 44.40  | 0.817 | 1.04  |
| PA5421_fdhA_at    | 53.80  | 57.00  | 0.643 | -1.06 |
| PA5422_at         | 108.12 | 100.40 | 0.349 | 1.08  |

### Supplementary Table 1. Probe set signal data for experimental and control samples

|                |         |         |       |       |
|----------------|---------|---------|-------|-------|
| PA5423_at      | 183.64  | 162.60  | 0.349 | 1.13  |
| PA5424_at      | 78.00   | 97.90   | 0.008 | -1.26 |
| PA5425_purK_at | 168.28  | 320.48  | 0.008 | -1.90 |
| PA5426_purE_at | 613.16  | 1031.63 | 0.008 | -1.68 |
| PA5427_adhA_at | 69.42   | 63.83   | 0.643 | 1.09  |
| PA5428_at      | 55.54   | 62.50   | 0.087 | -1.13 |
| PA5429_aspA_at | 1014.74 | 1528.43 | 0.008 | -1.51 |
| PA5430_at      | 94.14   | 110.97  | 0.238 | -1.18 |
| PA5431_at      | 20.24   | 17.32   | 0.484 | 1.17  |
| PA5432_at      | 93.74   | 74.00   | 0.151 | 1.27  |
| PA5433_at      | 36.20   | 34.03   | 0.643 | 1.06  |
| PA5434_mtr_at  | 27.02   | 39.45   | 0.151 | -1.46 |
| PA5435_at      | 176.96  | 276.15  | 0.048 | -1.56 |
| PA5436_at      | 852.30  | 839.85  | 0.817 | 1.01  |
| PA5437_at      | 74.38   | 84.17   | 0.151 | -1.13 |
| PA5438_at      | 268.78  | 278.58  | 0.484 | -1.04 |
| PA5439_at      | 41.68   | 36.50   | 0.087 | 1.14  |
| PA5440_at      | 70.52   | 128.13  | 0.024 | -1.82 |
| PA5441_at      | 262.24  | 272.77  | 0.817 | -1.04 |
| PA5442_at      | 61.48   | 35.45   | 0.008 | 1.73  |
| PA5443_uvrD_at | 243.00  | 240.27  | 1.000 | 1.01  |
| PA5444_at      | 21.60   | 22.65   | 1.000 | -1.05 |
| PA5445_at      | 311.88  | 335.20  | 0.643 | -1.07 |
| PA5446_i_at    | 385.10  | 1019.50 | 0.048 | -2.65 |
| PA5447_wbpZ_at | 55.02   | 61.33   | 0.484 | -1.11 |
| PA5448_wbpY_at | 98.64   | 55.35   | 0.008 | 1.78  |
| PA5449_wbpX_at | 99.96   | 88.82   | 0.349 | 1.13  |
| PA5450_wzt_at  | 192.04  | 102.90  | 0.008 | 1.87  |
| PA5451_wzm_at  | 79.82   | 69.10   | 0.349 | 1.16  |
| PA5452_wbpW_at | 109.72  | 48.35   | 0.008 | 2.27  |
| PA5453_gmd_at  | 316.76  | 139.82  | 0.008 | 2.27  |
| PA5454_rmd_at  | 113.32  | 69.13   | 0.024 | 1.64  |
| PA5455_at      | 259.40  | 192.22  | 0.151 | 1.35  |
| PA5456_at      | 312.52  | 198.30  | 0.024 | 1.58  |
| PA5457_at      | 115.88  | 94.85   | 0.024 | 1.22  |
| PA5458_at      | 150.06  | 97.75   | 0.008 | 1.54  |
| PA5459_at      | 131.44  | 140.50  | 0.484 | -1.07 |
| PA5460_at      | 9.26    | 11.68   | 0.349 | -1.26 |
| PA5461_at      | 531.86  | 785.35  | 0.024 | -1.48 |
| PA5462_at      | 363.94  | 314.70  | 0.048 | 1.16  |
| PA5463_at      | 212.32  | 250.40  | 0.008 | -1.18 |
| PA5464_at      | 84.32   | 91.85   | 0.413 | -1.09 |
| PA5465_at      | 126.00  | 62.50   | 0.024 | 2.02  |
| PA5466_at      | 44.66   | 30.60   | 0.008 | 1.46  |
| PA5467_at      | 24.38   | 19.67   | 0.151 | 1.24  |
| PA5468_at      | 16.10   | 23.47   | 0.087 | -1.46 |
| PA5469_at      | 10.38   | 15.35   | 0.349 | -1.48 |
| PA5470_at      | 185.60  | 45.70   | 0.024 | 4.06  |
| PA5471_at      | 538.56  | 130.10  | 0.024 | 4.14  |
| PA5472_at      | 166.88  | 191.90  | 0.238 | -1.15 |
| PA5473_at      | 27.84   | 24.20   | 0.349 | 1.15  |

### Supplementary Table 1. Probe set signal data for experimental and control samples

|                |         |         |       |       |
|----------------|---------|---------|-------|-------|
| PA5474_at      | 83.18   | 71.97   | 0.484 | 1.16  |
| PA5475_at      | 41.76   | 48.55   | 0.349 | -1.16 |
| PA5476_citA_at | 15.80   | 17.98   | 0.238 | -1.14 |
| PA5477_at      | 32.98   | 46.53   | 0.008 | -1.41 |
| PA5478_at      | 64.40   | 81.75   | 0.048 | -1.27 |
| PA5479_gltP_at | 124.52  | 396.22  | 0.008 | -3.18 |
| PA5480_at      | 4.06    | 4.97    | 0.484 | -1.22 |
| PA5481_at      | 25.76   | 17.45   | 0.238 | 1.48  |
| PA5482_at      | 45.34   | 25.67   | 0.087 | 1.77  |
| PA5483_algB_at | 121.92  | 110.02  | 0.238 | 1.11  |
| PA5484_at      | 61.68   | 62.57   | 1.000 | -1.01 |
| PA5485_at      | 89.44   | 106.72  | 0.087 | -1.19 |
| PA5486_at      | 43.48   | 49.78   | 0.238 | -1.14 |
| PA5487_at      | 150.02  | 194.25  | 0.087 | -1.29 |
| PA5488_at      | 553.12  | 477.75  | 0.008 | 1.16  |
| PA5489_dsbA_at | 869.64  | 738.53  | 0.024 | 1.18  |
| PA5490_cc4_at  | 2000.46 | 1934.30 | 1.000 | 1.03  |
| PA5491_at      | 943.78  | 985.85  | 1.000 | -1.04 |
| PA5492_at      | 297.18  | 373.90  | 0.008 | -1.26 |
| PA5493_polA_at | 221.66  | 239.57  | 0.151 | -1.08 |
| PA5494_at      | 239.10  | 324.98  | 0.024 | -1.36 |
| PA5495_thrB_at | 402.52  | 313.07  | 0.008 | 1.29  |
| PA5496_at      | 42.80   | 51.35   | 0.349 | -1.20 |
| PA5497_at      | 65.30   | 72.15   | 0.643 | -1.10 |
| PA5498_at      | 82.32   | 96.75   | 0.151 | -1.18 |
| PA5499_np20_at | 251.04  | 235.50  | 0.349 | 1.07  |
| PA5500_znuC_at | 216.58  | 173.93  | 0.151 | 1.25  |
| PA5501_znuB_at | 62.10   | 65.98   | 0.643 | -1.06 |
| PA5502_at      | 227.68  | 190.32  | 0.087 | 1.20  |
| PA5503_at      | 241.82  | 302.55  | 0.024 | -1.25 |
| PA5504_at      | 297.32  | 403.45  | 0.008 | -1.36 |
| PA5505_at      | 401.00  | 718.60  | 0.008 | -1.79 |
| PA5506_at      | 853.04  | 457.15  | 0.008 | 1.87  |
| PA5507_at      | 1211.20 | 905.37  | 0.008 | 1.34  |
| PA5508_at      | 821.08  | 570.30  | 0.048 | 1.44  |
| PA5509_at      | 461.28  | 322.20  | 0.008 | 1.43  |
| PA5510_at      | 127.18  | 100.72  | 0.008 | 1.26  |
| PA5511_at      | 33.32   | 54.60   | 0.008 | -1.64 |
| PA5512_at      | 72.98   | 55.82   | 0.048 | 1.31  |
| PA5513_at      | 119.60  | 110.63  | 0.484 | 1.08  |
| PA5514_at      | 7.38    | 10.43   | 0.349 | -1.41 |
| PA5515_at      | 92.84   | 63.38   | 0.008 | 1.46  |
| PA5516_pdxY_at | 117.06  | 111.60  | 0.484 | 1.05  |
| PA5517_at      | 37.46   | 37.08   | 0.643 | 1.01  |
| PA5518_at      | 40.10   | 46.68   | 0.151 | -1.16 |
| PA5519_at      | 90.90   | 135.88  | 0.008 | -1.49 |
| PA5520_at      | 16.98   | 23.90   | 0.349 | -1.41 |
| PA5521_at      | 53.76   | 54.67   | 0.817 | -1.02 |
| PA5522_at      | 58.16   | 42.18   | 0.048 | 1.38  |
| PA5523_at      | 86.36   | 51.85   | 0.008 | 1.67  |
| PA5524_at      | 43.88   | 56.25   | 0.048 | -1.28 |

**Supplementary Table 1. Probe set signal data for experimental and control samples**

|                 |         |         |       |       |
|-----------------|---------|---------|-------|-------|
| PA5525_at       | 40.92   | 45.88   | 0.484 | -1.12 |
| PA5526_at       | 37.10   | 51.28   | 0.151 | -1.38 |
| PA5527_at       | 91.88   | 142.65  | 0.008 | -1.55 |
| PA5528_at       | 921.58  | 556.10  | 0.024 | 1.66  |
| PA5529_at       | 95.04   | 59.45   | 0.048 | 1.60  |
| PA5530_at       | 610.10  | 24.70   | 0.008 | 24.70 |
| PA5531_tonB_at  | 355.66  | 463.95  | 0.048 | -1.30 |
| PA5532_at       | 16.32   | 8.93    | 0.151 | 1.83  |
| PA5533_at       | 76.92   | 90.53   | 0.238 | -1.18 |
| PA5534_at       | 6.52    | 8.63    | 0.484 | -1.32 |
| PA5535_at       | 15.86   | 16.73   | 0.643 | -1.05 |
| PA5536_at       | 6.90    | 15.88   | 0.048 | -2.30 |
| PA5537_at       | 19.20   | 16.60   | 0.817 | 1.16  |
| PA5538_amiA_at  | 8.94    | 7.38    | 0.643 | 1.21  |
| PA5539_at       | 21.94   | 19.85   | 0.817 | 1.11  |
| PA5540_at       | 21.22   | 24.88   | 0.484 | -1.17 |
| PA5541_at       | 22.76   | 19.73   | 0.905 | 1.15  |
| PA5542_at       | 23.52   | 17.30   | 0.349 | 1.36  |
| PA5543_at       | 72.90   | 44.97   | 0.008 | 1.62  |
| PA5544_at       | 35.02   | 31.50   | 0.484 | 1.11  |
| PA5545_at       | 162.72  | 106.73  | 0.048 | 1.52  |
| PA5546_at       | 83.36   | 83.93   | 0.817 | -1.01 |
| PA5547_at       | 41.46   | 51.50   | 0.087 | -1.24 |
| PA5548_at       | 17.08   | 23.40   | 0.238 | -1.37 |
| PA5549_glmS_at  | 156.24  | 239.40  | 0.008 | -1.53 |
| PA5550_at       | 143.38  | 194.82  | 0.008 | -1.36 |
| PA5551_at       | 119.54  | 174.57  | 0.008 | -1.46 |
| PA5552_glmU_at  | 533.56  | 575.22  | 0.151 | -1.08 |
| PA5553_atpC_at  | 561.72  | 806.93  | 0.008 | -1.44 |
| PA5554_atpD_at  | 1037.06 | 1240.22 | 0.024 | -1.20 |
| PA5555_atpG_at  | 4236.76 | 3767.47 | 0.151 | 1.12  |
| PA5556_atpA_at  | 4420.42 | 3018.92 | 0.008 | 1.46  |
| PA5557_atpH_at  | 4279.04 | 3760.07 | 0.087 | 1.14  |
| PA5558_atpF_at  | 6139.24 | 4532.70 | 0.024 | 1.35  |
| PA5559_atpE_at  | 3632.70 | 3653.45 | 0.817 | -1.01 |
| PA5560_atpB_at  | 1423.86 | 2250.20 | 0.008 | -1.58 |
| PA5561_atpI_at  | 186.00  | 345.05  | 0.008 | -1.86 |
| PA5562_spoOJ_at | 276.22  | 422.70  | 0.008 | -1.53 |
| PA5563_soj_at   | 607.10  | 692.17  | 0.643 | -1.14 |
| PA5564_gidB_at  | 405.72  | 590.90  | 0.008 | -1.46 |
| PA5565_gidA_at  | 464.54  | 538.63  | 0.151 | -1.16 |
| PA5566_at       | 6.36    | 7.80    | 0.341 | -1.23 |
| PA5567_at       | 81.84   | 117.47  | 0.008 | -1.44 |
| PA5568_at       | 1133.60 | 1302.40 | 0.008 | -1.15 |
| PA5569_rnpA_at  | 2750.88 | 2581.73 | 0.024 | 1.07  |
| PA5570_rpmH_at  | 988.28  | 1398.30 | 0.008 | -1.41 |

\* The fold change is a positive number when the expression level in the experiment increased compared to the control and is a negative number when the expression level in the experiment declined.
