# Supplementary material for: Microarray analysis of Pseudomonas aeruginosa reveals induction of pyocin genes in response to hydrogen peroxide
Source: Springer Nature journal article supplement (doi:10.1186/1471-2164-6-115), 2005-09-08
Supplement: 12864_2005_316_MOESM2_ESM.pdf [file 12864_2005_316_MOESM2_ESM.pdf]

**Supplementary Table 2. Comparison of the fold changes and their directions of the significantly marked genes in this study with those in Palma *et al.* [12]**

| Gene (Name)            | Fold change * |                          | Direction      |                          |
|------------------------|---------------|--------------------------|----------------|--------------------------|
|                        | This study    | Palma <i>et al.</i> [12] | This study     | Palma <i>et al.</i> [12] |
| PA0069                 | 2.3           | 7.0                      | Upregulation   | Upregulation             |
| PA0128                 | -2.3          | Not significant          | Downregulation |                          |
| PA0162                 | -2.2          | Not significant          | Downregulation |                          |
| PA0182                 | 6.8           | Not significant          | Upregulation   |                          |
| PA0280 ( <i>cysA</i> ) | -2.9          | -5.0                     | Downregulation | Downregulation           |
| PA0281 ( <i>cysW</i> ) | -2.8          | Not significant          | Downregulation |                          |
| PA0282 ( <i>cysT</i> ) | -2.5          | -8.6                     | Downregulation | Downregulation           |
| PA0283 ( <i>sbp</i> )  | -2.0          | Not significant          | Downregulation |                          |
| PA0284                 | -2.3          | Not significant          | Downregulation |                          |
| PA0335                 | 2.0           | Not significant          | Upregulation   |                          |
| PA0352                 | -2.1          | -3.7                     | Downregulation | Downregulation           |
| PA0385                 | -2.1          | -2.4                     | Downregulation | Downregulation           |
| PA0447 ( <i>gcdH</i> ) | 2.2           | -4.7                     | Upregulation   | Downregulation           |
| PA0492                 | 2.0           | 2.9                      | Upregulation   | Upregulation             |
| PA0493                 | 2.1           | 8.0                      | Upregulation   | Upregulation             |
| PA0494                 | 2.3           | 4.6                      | Upregulation   | Upregulation             |
| PA0495                 | 2.1           | 2.9                      | Upregulation   | Upregulation             |
| PA0582 ( <i>folB</i> ) | -2.4          | -5.3                     | Downregulation | Downregulation           |
| PA0586                 | 2.4           | 3.2                      | Upregulation   | Upregulation             |
| PA0587                 | 2.2           | 3.9                      | Upregulation   | Upregulation             |
| PA0612                 | 5.3           | Not significant          | Upregulation   |                          |
| PA0613                 | 2.3           | Not significant          | Upregulation   |                          |
| PA0614                 | 2.9           | Not significant          | Upregulation   |                          |
| PA0615                 | 4.2           | Not significant          | Upregulation   |                          |
| PA0616                 | 3.5           | Not significant          | Upregulation   |                          |
| PA0617                 | 3.4           | Not significant          | Upregulation   |                          |
| PA0618                 | 3.1           | Not significant          | Upregulation   |                          |
| PA0619                 | 3.0           | Not significant          | Upregulation   |                          |
| PA0620                 | 4.2           | Not significant          | Upregulation   |                          |
| PA0621                 | 2.6           | Not significant          | Upregulation   |                          |
| PA0622                 | 3.0           | Not significant          | Upregulation   |                          |
| PA0623                 | 2.8           | Not significant          | Upregulation   |                          |
| PA0624                 | 2.5           | Not significant          | Upregulation   |                          |
| PA0625                 | 3.4           | Not significant          | Upregulation   |                          |
| PA0626                 | 2.3           | Not significant          | Upregulation   |                          |
| PA0627                 | 2.3           | Not significant          | Upregulation   |                          |
| PA0628                 | 2.2           | Not significant          | Upregulation   |                          |
| PA0629                 | 2.6           | Not significant          | Upregulation   |                          |
| PA0630                 | 2.0           | Not significant          | Upregulation   |                          |
| PA0631                 | 2.3           | Not significant          | Upregulation   |                          |
| PA0633                 | 3.3           | Not significant          | Upregulation   |                          |
| PA0634                 | 3.5           | Not significant          | Upregulation   |                          |
| PA0635                 | 3.6           | Not significant          | Upregulation   |                          |
| PA0636                 | 3.4           | Not significant          | Upregulation   |                          |
| PA0637                 | 3.3           | Not significant          | Upregulation   |                          |
| PA0638                 | 3.2           | Not significant          | Upregulation   |                          |
| PA0639                 | 3.0           | Not significant          | Upregulation   |                          |
| PA0640                 | 2.6           | Not significant          | Upregulation   |                          |
| PA0641                 | 5.0           | Not significant          | Upregulation   |                          |
| PA0642                 | 2.3           | Not significant          | Upregulation   |                          |

**Supplementary Table 2. Comparison of the fold changes and their directions of the significantly marked genes in this study with those in Palma *et al.* [12]**

|                |      |                 |                |                |
|----------------|------|-----------------|----------------|----------------|
| PA0643         | 2.1  | Not significant | Upregulation   |                |
| PA0645         | 2.5  | Not significant | Upregulation   |                |
| PA0646         | 2.5  | Not significant | Upregulation   |                |
| PA0669         | 2.8  | 2.1             | Upregulation   | Upregulation   |
| PA0670         | 5.4  | 7.0             | Upregulation   | Upregulation   |
| PA0671         | 5.02 | 22.9            | Upregulation   | Upregulation   |
| PA0745         | 3.0  | Not significant | Upregulation   |                |
| PA0746         | 3.1  | Not significant | Upregulation   |                |
| PA0747         | 2.4  | 2.6             | Upregulation   | Upregulation   |
| PA0866 (aroP2) | 2.3  | -2.8            | Upregulation   | Downregulation |
| PA0873 (phhR)  | 2.0  | Not significant | Upregulation   |                |
| PA0887 (acsA)  | 2.0  | Not significant | Upregulation   |                |
| PA0905 (csrA)  | -2.5 | Not significant | Downregulation |                |
| PA0915         | -2.0 | -21.7           | Downregulation | Downregulation |
| PA0916         | -2.2 | -11.2           | Downregulation | Downregulation |
| PA0922         | 3.7  | 10.0            | Upregulation   | Upregulation   |
| PA0975         | -2.4 | -3.2            | Downregulation | Downregulation |
| PA0976         | -2.7 | Not significant | Downregulation |                |
| PA0983         | 2.0  | 5.2             | Upregulation   | Upregulation   |
| PA0996         | -2.0 | -2.3            | Downregulation | Downregulation |
| PA1000         | -2.4 | Not significant | Downregulation |                |
| PA1001 (phnA)  | -2.0 | Not significant | Downregulation |                |
| PA1002 (phnB)  | -2.1 | Not significant | Downregulation |                |
| PA1041         | 2.2  | 4.1             | Upregulation   | Upregulation   |
| PA1112         | 2.5  | Not significant | Upregulation   |                |
| PA1150 (pys2)  | 2.9  | Not significant | Upregulation   |                |
| PA1151 (imm2)  | -2.1 | Not significant | Downregulation |                |
| PA1228         | -2.8 | -4.1            | Downregulation | Downregulation |
| PA1317 (cyoA)  | -2.3 | -2.5            | Downregulation | Downregulation |
| PA1319 (cyoC)  | -2.1 | Not significant | Downregulation |                |
| PA1372         | -2.1 | Not significant | Downregulation |                |
| PA1408         | 2.0  | 2.1             | Upregulation   | Upregulation   |
| PA1414         | -2.9 | 8.7             | Downregulation | Upregulation   |
| PA1432 (lasI)  | -2.0 | Not significant | Downregulation |                |
| PA1466         | 13.9 | 12.6            | Upregulation   | Upregulation   |
| PA1574         | -2.4 | -5.4            | Downregulation | Downregulation |
| PA1592         | -2.1 | Not significant | Downregulation |                |
| PA1634 (kdpB)  | -2.3 | Not significant | Downregulation |                |
| PA1673         | -2.0 | 3.5             | Downregulation | Upregulation   |
| PA1687 (speE)  | -2.6 | -7.6            | Downregulation | Downregulation |
| PA1759         | 2.3  | 3.9             | Upregulation   | Upregulation   |
| PA1760         | 2.8  | Not significant | Upregulation   |                |
| PA1776         | -2.0 | Not significant | Downregulation |                |
| PA1837         | -2.1 | -7.5            | Downregulation | Downregulation |
| PA1845         | -2.3 | Not significant | Downregulation |                |
| PA1852         | -2.0 | -2.3            | Downregulation | Downregulation |
| PA1865         | 3.1  | 3.6             | Upregulation   | Upregulation   |
| PA1946 (rbsB)  | 2.7  | 5.0             | Upregulation   | Upregulation   |
| PA2006         | 2.1  | Not significant | Upregulation   |                |
| PA2007 (maiA)  | 2.0  | Not significant | Upregulation   |                |
| PA2008 (fahA)  | 2.2  | Not significant | Upregulation   |                |
| PA2009 (hmgA)  | 2.2  | Not significant | Upregulation   |                |

**Supplementary Table 2. Comparison of the fold changes and their directions of the significantly marked genes in this study with those in Palma *et al.* [12]**

|                |       |                 |                |                |
|----------------|-------|-----------------|----------------|----------------|
| PA2012         | 2.0   | -2.2            | Upregulation   | Downregulation |
| PA2247 (bkdA1) | 2.1   | 2.4             | Upregulation   | Upregulation   |
| PA2248 (bkdA2) | 2.5   | Not significant | Upregulation   |                |
| PA2288         | 10.3  | 23.5            | Upregulation   | Upregulation   |
| PA2398 (fpvA)  | -5.7  | Not significant | Downregulation |                |
| PA2403         | -3.2  | -2.6            | Downregulation | Downregulation |
| PA2404         | -3.0  | -3.8            | Downregulation | Downregulation |
| PA2405         | -3.9  | -4.9            | Downregulation | Downregulation |
| PA2407         | -3.3  | -4.5            | Downregulation | Downregulation |
| PA2408         | -2.9  | -12.0           | Downregulation | Downregulation |
| PA2409         | -3.7  | Not significant | Downregulation |                |
| PA2410         | -2.5  | Not significant | Downregulation |                |
| PA2426 (pvdS)  | -3.0  | 12.7            | Downregulation | Upregulation   |
| PA2453         | -2.0  | -3.5            | Downregulation | Downregulation |
| PA2523         | 2.0   | 4.0             | Upregulation   | Upregulation   |
| PA2552         | 2.3   | Not significant | Upregulation   |                |
| PA2553         | 2.5   | Not significant | Upregulation   |                |
| PA2555         | 2.2   | 3.1             | Upregulation   | Upregulation   |
| PA2557         | 2.0   | 5.4             | Upregulation   | Upregulation   |
| PA2579         | -2.0  | Not significant | Downregulation |                |
| PA2619 (infA)  | -2.7  | -5.9            | Downregulation | Downregulation |
| PA2630         | -2.4  | -10.4           | Downregulation | Downregulation |
| PA2653         | -2.3  | -5.1            | Downregulation | Downregulation |
| PA2667         | -3.0  | Not significant | Downregulation |                |
| PA2730         | -2.2  | Not significant | Downregulation |                |
| PA3007 (lexA)  | 4.0   | 11.5            | Upregulation   | Upregulation   |
| PA3008         | 5.7   | 13.9            | Upregulation   | Upregulation   |
| PA3009         | -3.1  | Not significant | Downregulation |                |
| PA3080         | 2.7   | Not significant | Upregulation   |                |
| PA3147 (wbpJ)  | -2.0  | Not significant | Downregulation |                |
| PA3149 (wbpH)  | -2.1  | Not significant | Downregulation |                |
| PA3150 (wbpG)  | -2.3  | Not significant | Downregulation |                |
| PA3235         | 2.0   | 3.6             | Upregulation   | Upregulation   |
| PA3281         | 2.2   | 5.9             | Upregulation   | Upregulation   |
| PA3282         | 2.5   | 7.4             | Upregulation   | Upregulation   |
| PA3283         | 3.1   | 10.3            | Upregulation   | Upregulation   |
| PA3284         | 2.3   | 4.4             | Upregulation   | Upregulation   |
| PA3404         | 2.1   | Not significant | Upregulation   |                |
| PA3413         | 4.4   | 2.9             | Upregulation   | Upregulation   |
| PA3414         | 9.8   | Not significant | Upregulation   |                |
| PA3417         | 2.2   | 5.3             | Upregulation   | Upregulation   |
| PA3496         | -2.4  | 3.5             | Downregulation | Upregulation   |
| PA3531 (bfrB)  | -2.0  | Not significant | Downregulation |                |
| PA3574         | -2.3  | Not significant | Downregulation |                |
| PA3607         | -2.18 | -5.5            | Downregulation | Downregulation |
| PA3608         | -2.5  | -21.5           | Downregulation | Downregulation |
| PA3609         | -2.07 | -6.1            | Downregulation | Downregulation |
| PA3610         | -2.99 | -12.6           | Downregulation | Downregulation |
| PA3610 (potD)  | -3.0  | -12.6           | Downregulation | Downregulation |
| PA3616         | 2.8   | Not significant | Upregulation   |                |
| PA3617 (recA)  | 2.7   | 2.8             | Upregulation   | Upregulation   |
| PA3621 (fdxA)  | -2.0  | -4.5            | Downregulation | Downregulation |

**Supplementary Table 2. Comparison of the fold changes and their directions of the significantly marked genes in this study with those in Palma *et al.* [12]**

|                         |      |                 |                |                |
|-------------------------|------|-----------------|----------------|----------------|
| PA3672                  | 2.0  | Not significant | Upregulation   |                |
| PA3712                  | 2.5  | Not significant | Upregulation   |                |
| PA3713                  | -2.1 | -8.7            | Downregulation | Downregulation |
| PA3767                  | -2.2 | Not significant | Downregulation |                |
| PA3787                  | 2.2  | Not significant | Upregulation   |                |
| PA3808                  | -2.0 | -2.4            | Downregulation | Downregulation |
| PA3866                  | 2.2  | Not significant | Upregulation   |                |
| PA3901 ( <i>fecA</i> )  | 2.1  | Not significant | Upregulation   |                |
| PA3913                  | -2.1 | Not significant | Downregulation |                |
| PA3922                  | 2.0  | -2.3            | Upregulation   | Downregulation |
| PA3923                  | 3.3  | Not significant | Upregulation   |                |
| PA3967                  | -2.5 | -7.4            | Downregulation | Downregulation |
| PA4132                  | -2.2 | -3.4            | Downregulation | Downregulation |
| PA4133                  | -2.3 | Not significant | Downregulation |                |
| PA4141                  | -2.1 | Not significant | Downregulation |                |
| PA4156                  | -5.1 | 12.4            | Downregulation | Upregulation   |
| PA4199                  | 2.3  | Not significant | Upregulation   |                |
| PA4218                  | -2.6 | Not significant | Downregulation |                |
| PA4219                  | -2.5 | 29.4            | Downregulation | Upregulation   |
| PA4221 ( <i>fptA</i> )  | -2.7 | 44.1            | Downregulation | Upregulation   |
| PA4222                  | -2.1 | Not significant | Downregulation |                |
| PA4223                  | -2.6 | Not significant | Downregulation |                |
| PA4224                  | -2.4 | Not significant | Downregulation |                |
| PA4225 ( <i>pchF</i> )  | -3.3 | Not significant | Downregulation |                |
| PA4226 ( <i>pchE</i> )  | -2.6 | Not significant | Downregulation |                |
| PA4228 ( <i>pchD</i> )  | -2.3 | 15.2            | Downregulation | Upregulation   |
| PA4229 ( <i>pchC</i> )  | -2.6 | Not significant | Downregulation |                |
| PA4230 ( <i>pchB</i> )  | -4.3 | 14.5            | Downregulation | Upregulation   |
| PA4231 ( <i>pchA</i> )  | -2.9 | Not significant | Downregulation |                |
| PA4236 ( <i>katA</i> )  | 2.0  | 34.1            | Upregulation   | Upregulation   |
| PA4390                  | -2.4 | -3.1            | Downregulation | Downregulation |
| PA4427 ( <i>sspB</i> )  | -2.0 | -2.2            | Downregulation | Downregulation |
| PA4432 ( <i>rpsI</i> )  | -2.3 | -7.2            | Downregulation | Downregulation |
| PA4496                  | 2.1  | Not significant | Upregulation   |                |
| PA4553 ( <i>pilX</i> )  | -2.0 | Not significant | Downregulation |                |
| PA4555 ( <i>pilY2</i> ) | -3.0 | 2.1             | Downregulation | Upregulation   |
| PA4563 ( <i>rpsT</i> )  | -2.3 | -8.9            | Downregulation | Downregulation |
| PA4582                  | 3.2  | 21.4            | Upregulation   | Upregulation   |
| PA4583                  | 2.6  | 14.0            | Upregulation   | Upregulation   |
| PA4584                  | 3.0  | 7.7             | Upregulation   | Upregulation   |
| PA4585 ( <i>rtcA</i> )  | 2.0  | Not significant | Upregulation   |                |
| PA4613 ( <i>katB</i> )  | 4.5  | 56.9            | Upregulation   | Upregulation   |
| PA4642                  | -2.3 | Not significant | Downregulation |                |
| PA4645                  | -2.2 | -5.3            | Downregulation | Downregulation |
| PA4673                  | -2.1 | -19.2           | Downregulation | Downregulation |
| PA4719                  | -2.2 | -5.9            | Downregulation | Downregulation |
| PA4747 ( <i>secG</i> )  | -2.6 | -3.1            | Downregulation | Downregulation |
| PA4753                  | -2.3 | -3.0            | Downregulation | Downregulation |
| PA4759 ( <i>dapB</i> )  | -2.3 | Not significant | Downregulation |                |
| PA4763 ( <i>recN</i> )  | 8.3  | 11.7            | Upregulation   | Upregulation   |
| PA4839 ( <i>speA</i> )  | -2.9 | -11.4           | Downregulation | Downregulation |
| PA4840                  | -2.5 | -3.3            | Downregulation | Downregulation |

**Supplementary Table 2. Comparison of the fold changes and their directions of the significantly marked genes in this study with those in Palma *et al.* [12]**

|               |      |                 |                |                |
|---------------|------|-----------------|----------------|----------------|
| PA4843        | 2.0  | Not significant | Upregulation   |                |
| PA5049 (rpmE) | -2.8 | -5.9            | Downregulation | Downregulation |
| PA5167        | 2.5  | Not significant | Upregulation   |                |
| PA5235 (glpT) | -3.4 | Not significant | Downregulation |                |
| PA5315 (rpmG) | -2.2 | -7.4            | Downregulation | Downregulation |
| PA5351        | -2.2 | -4.8            | Downregulation | Downregulation |
| PA5380        | 2.0  | 2.4             | Upregulation   | Upregulation   |
| PA5401        | 2.1  | Not significant | Upregulation   |                |
| PA5407        | -2.5 | -5.1            | Downregulation | Downregulation |
| PA5446        | -2.7 | 3.7             | Downregulation | Upregulation   |
| PA5452 (wbpW) | 2.3  | Not significant | Upregulation   |                |
| PA5453 (gmd)  | 2.3  | Not significant | Upregulation   |                |
| PA5465        | 2.0  | 3.5             | Upregulation   | Upregulation   |
| PA5470        | 4.1  | Not significant | Upregulation   |                |
| PA5471        | 4.1  | Not significant | Upregulation   |                |
| PA5479 (glpP) | -3.2 | -19.3           | Downregulation | Downregulation |
| PA5530        | 24.7 | Not significant | Upregulation   |                |

\* The fold change is a positive number when the expression level in the experiment increased compared to the control and is a negative number when the expression level in the experiment declined.
