# Supplementary material for: Microarray analysis of Pseudomonas aeruginosa reveals induction of pyocin genes in response to hydrogen peroxide
Source: Springer Nature journal article supplement (doi:10.1186/1471-2164-6-115), 2005-09-08
Supplement: 12864_2005_316_MOESM3_ESM.pdf [file 12864_2005_316_MOESM3_ESM.pdf]

**Supplementary Table 3. Comparison of the expression change directions of genes that we discussed in this study with those in Palma *et al.* [12]**

| Gene (Name)                                  | Direction of expression change |                          | Comparison between this study and Palma <i>et al.</i> [12] (in the order named) |                                   |                                 |                                  |                                    |
|----------------------------------------------|--------------------------------|--------------------------|---------------------------------------------------------------------------------|-----------------------------------|---------------------------------|----------------------------------|------------------------------------|
|                                              | This study                     | Palma <i>et al.</i> [12] | Agreement                                                                       |                                   | Disagreement                    |                                  |                                    |
|                                              |                                |                          | Upregulation-<br>Upregulation                                                   | Downregulation-<br>Downregulation | Downregulation-<br>Upregulation | Upregulation-<br>No significance | Downregulation-<br>No significance |
| <i>Primary metabolism-related</i>            |                                |                          |                                                                                 |                                   |                                 |                                  |                                    |
| PA1317 ( <i>cyoA</i> )                       | Downregulation                 | Downregulation           |                                                                                 | X                                 |                                 |                                  |                                    |
| PA1319 ( <i>cyoC</i> )                       | Downregulation                 |                          |                                                                                 |                                   |                                 |                                  | X                                  |
| PA3621 ( <i>fdxA</i> )                       | Downregulation                 | Downregulation           |                                                                                 | X                                 |                                 |                                  |                                    |
| PA4133                                       | Downregulation                 |                          |                                                                                 |                                   |                                 |                                  | X                                  |
| PA0654 ( <i>speD</i> )                       |                                |                          |                                                                                 |                                   |                                 |                                  |                                    |
| PA1687 ( <i>speE</i> )                       | Downregulation                 | Downregulation           |                                                                                 | X                                 |                                 |                                  |                                    |
| PA4839 ( <i>speA</i> )                       | Downregulation                 | Downregulation           |                                                                                 | X                                 |                                 |                                  |                                    |
| PA3607 ( <i>potA</i> )                       | Downregulation                 | Downregulation           |                                                                                 | X                                 |                                 |                                  |                                    |
| PA3608 ( <i>potB</i> )                       | Downregulation                 | Downregulation           |                                                                                 | X                                 |                                 |                                  |                                    |
| PA3609 ( <i>potC</i> )                       | Downregulation                 | Downregulation           |                                                                                 | X                                 |                                 |                                  |                                    |
| PA3610 ( <i>potD</i> )                       | Downregulation                 | Downregulation           |                                                                                 | X                                 |                                 |                                  |                                    |
| PA4432 ( <i>rpsL</i> )                       | Downregulation                 | Downregulation           |                                                                                 | X                                 |                                 |                                  |                                    |
| PA4563 ( <i>rpsT</i> )                       | Downregulation                 | Downregulation           |                                                                                 | X                                 |                                 |                                  |                                    |
| PA5049 ( <i>rpmE</i> )                       | Downregulation                 | Downregulation           |                                                                                 | X                                 |                                 |                                  |                                    |
| PA5315 ( <i>rpmG</i> )                       | Downregulation                 | Downregulation           |                                                                                 | X                                 |                                 |                                  |                                    |
| PA0671                                       | Upregulation                   | Upregulation             | X                                                                               |                                   |                                 |                                  |                                    |
| PA3008                                       | Upregulation                   | Upregulation             | X                                                                               |                                   |                                 |                                  |                                    |
| <i>Cellular protective mechanism-related</i> |                                |                          |                                                                                 |                                   |                                 |                                  |                                    |
| PA4236 ( <i>katA</i> )                       | Upregulation                   | Upregulation             | X                                                                               |                                   |                                 |                                  |                                    |
| PA4613 ( <i>katB</i> )                       | Upregulation                   | Upregulation             | X                                                                               |                                   |                                 |                                  |                                    |
| PA4366 ( <i>sodB</i> )                       |                                |                          |                                                                                 |                                   |                                 |                                  |                                    |
| PA4468 ( <i>sodM</i> )                       |                                |                          |                                                                                 |                                   |                                 |                                  |                                    |
| PA3007 ( <i>lexA</i> )                       | Upregulation                   | Upregulation             | X                                                                               |                                   |                                 |                                  |                                    |
| PA3008                                       | Upregulation                   | Upregulation             | X                                                                               |                                   |                                 |                                  |                                    |
| PA3616                                       | Upregulation                   |                          |                                                                                 |                                   |                                 | X                                |                                    |
| PA3617 ( <i>recA</i> )                       | Upregulation                   | Upregulation             | X                                                                               |                                   |                                 |                                  |                                    |
| PA0669                                       | Upregulation                   | Upregulation             | X                                                                               |                                   |                                 |                                  |                                    |
| PA3413                                       | Upregulation                   | Upregulation             | X                                                                               |                                   |                                 |                                  |                                    |
| PA3414                                       | Upregulation                   | Upregulation             | X                                                                               |                                   |                                 |                                  |                                    |
| PA4763 ( <i>recN</i> )                       | Upregulation                   | Upregulation             | X                                                                               |                                   |                                 |                                  |                                    |
| <i>Iron regulation-related</i>               |                                |                          |                                                                                 |                                   |                                 |                                  |                                    |
| PA2426 ( <i>pvdS</i> )                       | Downregulation                 | Upregulation             |                                                                                 |                                   | X                               |                                  |                                    |
| PA2398 ( <i>fpvA</i> )                       | Downregulation                 |                          |                                                                                 |                                   |                                 |                                  | X                                  |
| PA4221 ( <i>fptA</i> )                       | Downregulation                 | Upregulation             |                                                                                 |                                   | X                               |                                  |                                    |
| PA4225 ( <i>pchF</i> )                       | Downregulation                 |                          |                                                                                 |                                   |                                 |                                  | X                                  |
| PA4226 ( <i>pchE</i> )                       | Downregulation                 |                          |                                                                                 |                                   |                                 |                                  | X                                  |
| PA4228 ( <i>pchD</i> )                       | Downregulation                 | Upregulation             |                                                                                 |                                   | X                               |                                  |                                    |



**Supplementary Table 3. Comparison of the expression change directions of genes that we discussed in this study with those in Palma *et al.* [12]**

|                        |                |   |
|------------------------|----------------|---|
| PA0637                 | Upregulation   | X |
| PA0638                 | Upregulation   | X |
| PA0639                 | Upregulation   | X |
| PA0640                 | Upregulation   | X |
| PA0641                 | Upregulation   | X |
| PA0642                 | Upregulation   | X |
| PA0643                 | Upregulation   | X |
| PA0644                 |                |   |
| PA0645                 | Upregulation   | X |
| PA0646                 | Upregulation   | X |
| PA0647                 |                |   |
| PA0648                 |                |   |
| PA1151 ( <i>imm2</i> ) | Downregulation | X |

---
