# Supplementary figures and images for: Microarray analysis of Pseudomonas aeruginosa reveals induction of pyocin genes in response to hydrogen peroxide
Source: Springer Nature journal article supplement (doi:10.1186/1471-2164-6-115), 2005-09-08

**Functional Classes**

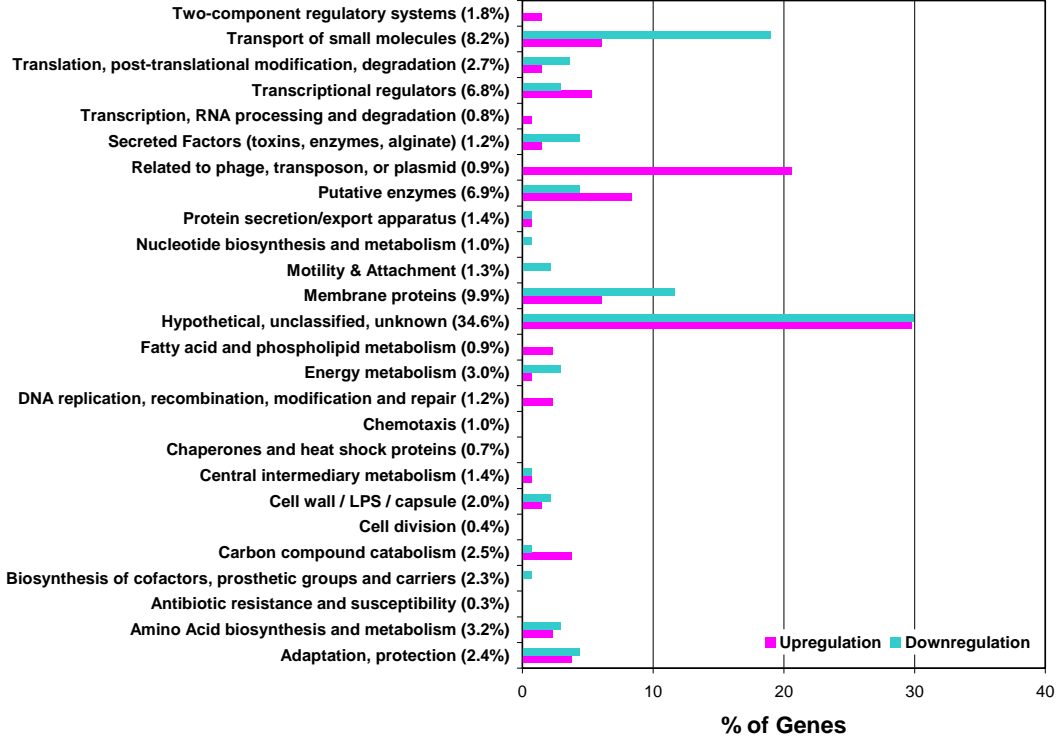

Supplement: 12864_2005_316_MOESM4_ESM.pdf [file 12864_2005_316_MOESM4_ESM.pdf]

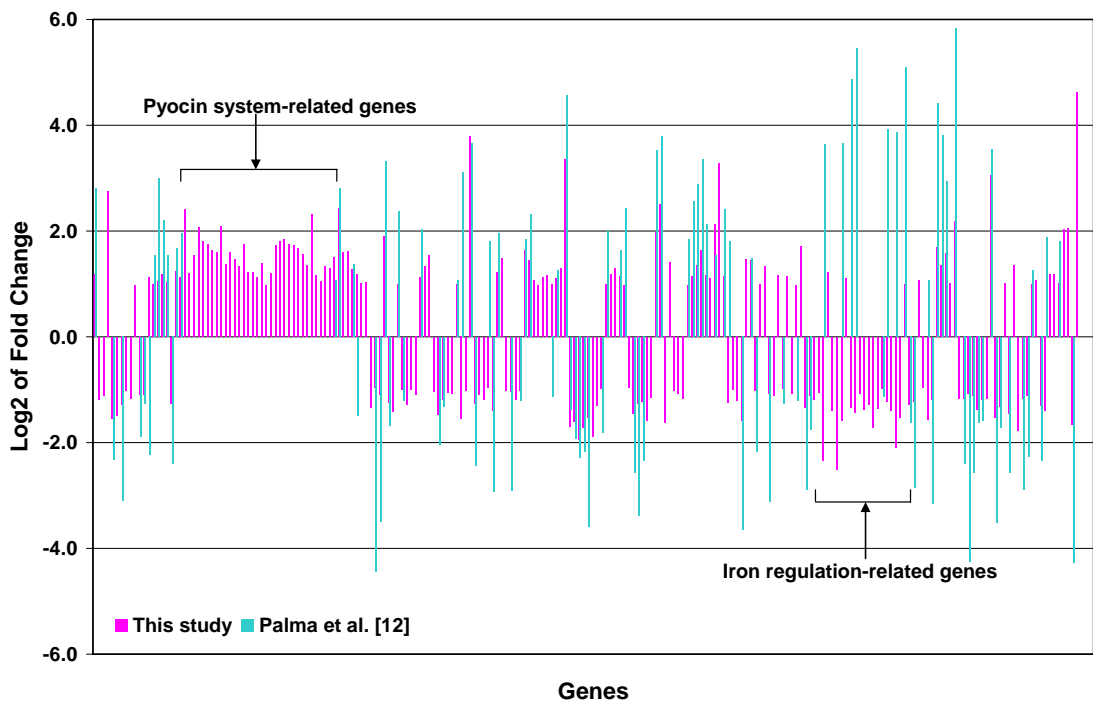

Supplement: 12864_2005_316_MOESM5_ESM.pdf [file 12864_2005_316_MOESM5_ESM.pdf]

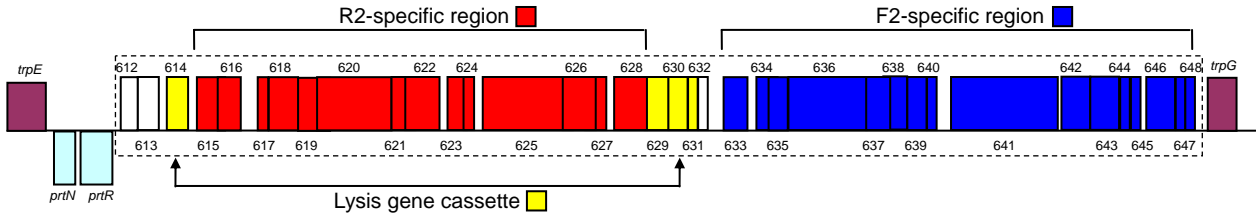

Supplement: 12864_2005_316_MOESM6_ESM.pdf [file 12864_2005_316_MOESM6_ESM.pdf]
